# Supplementary material for: The NTP generating activity of pyruvate kinase II is critical for apicoplast maintenance in Plasmodium falciparum
Source: eLife journal article supplement (doi:10.7554/elife.50807), 2020-08-20
Supplement: supp [file elife-50807-supp-v1.zip]

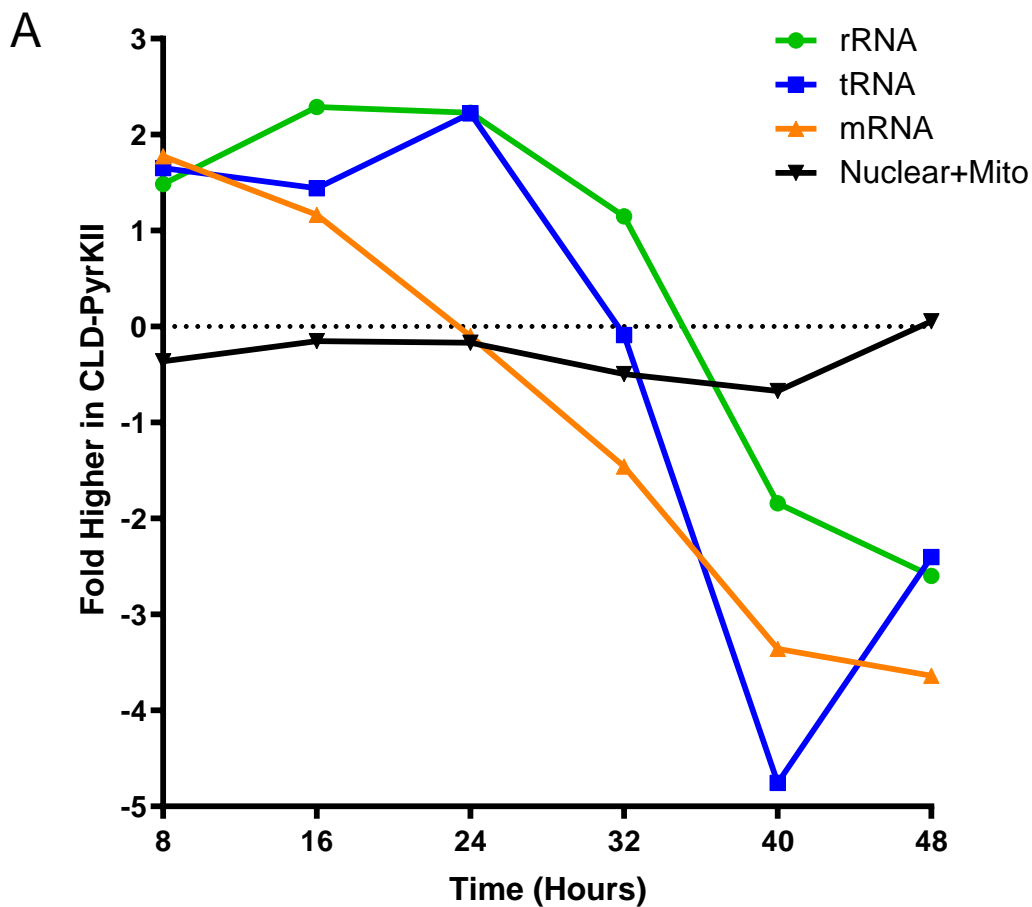

**B**

| RNA Type | Gene Name                                 | PlasmoDB ID   |
|----------|-------------------------------------------|---------------|
| rRNA     | small subunit ribosomal RNA               | PFC10_API0002 |
|          | large subunit ribosomal RNA               | PFC10_API0010 |
| tRNA     | tRNA Methionine                           | PFC10_API0009 |
|          | tRNA Tyrosine                             | PFC10_API0049 |
| mRNA     | DNA-directed RNA polymerase subunit beta" | PFC10_API0017 |
|          | elongation factor Tu                      | PFC10_API0028 |
|          | apicoplast ribosomal protein S5           | PFC10_API0033 |
|          | apicoplast ribosomal protein L16          | PFC10_API0038 |
|          | apicoplast ribosomal protein L2           | PFC10_API0041 |
|          | chaperone protein ClpM                    | PFC10_API0060 |
