# Supplementary material for: The NTP generating activity of pyruvate kinase II is critical for apicoplast maintenance in Plasmodium falciparum
Source: eLife journal article supplement (doi:10.7554/elife.50807), 2020-08-20
Supplement: supp [file elife-50807-supp-v1.zip]

*gaattc*GGCAGTGGAAACGGCTCAGGGGATCTGCTGTTCTTGAATAATATTAACATTAACAAAA  
TGTTGAACGCAAAAAGAATATCCTAGCCATTAGAAATGGGACGGTTCGTAACATTGATGACA  
TTAACCTTTTAAACCACAACAAGAAAAACGAAATTTTCGTTTACGAAATGTAAACAAATCGCAACG  
ATTGGTCCCGCTTCAGAAAATTTTGAACAACCTGAAAACTGTACCTGAACGGTATTGATGTCTT  
TCGTCTGAACTTTAGTCATGGCTTGAAAAGCATCAAGAAATACATTATTAATTCTATCAGGATCC  
TGGAAAAAAATATGACACCACAATCGGAATTTTAGGTGATATTCAAGGGCCGAAAATACGGATT  
GGCGAATTTGAAAAAACAGATTAACGAAAATGATAATAATACGTTTGTGAACTGAAAGAAGG  
TGATCTGTTTCAGTTTCGATCTGATGAATAGCCTGGGCAATCAGAATCGCGTGCAGCTGAATTATC  
CGGAACTGATTAAGAACGCAAAAGCGGGCCAGATCATTCTGCTGGACGATGGTAACCTGAAAATG  
AAAATTTTAGAAAACAACTATGATACTAGCAACATTCAGAACTCTTACATTAAGTCCAGGTCTT  
GACCGGTGGCAAACCTGTACAGCAAAAAAGGCTTCTGTATCCCAAACATGATCATGCCGATTGATG  
TTCTGAGCGAGAAAGATATTAAGACATCCTGTTCTGCATCAACGAAGAAGTTGACTTCCTGGGT  
TACTCCTTTGTGCAGACGGAATATGATCTGATCTTCTGCGTAACATCATCAACGATTACTATGA  
AAGCGATTTTACAATAACATCAAACGCAAAGATCGGATTAACCTTGACCAAAACAATCTGCAGA  
TGAAAACCTTTGATGACGAAAACGATTTCTATATTAAGAAGTAAACGATTACTACAATAACTAT  
TACCTGAAAATGTTGAGAAATACAAACAGATCTATGACGTCTATAAAAATCAGGACCTTTACAT  
TAATGATAATATTCAAACCACTACAACAAAAACATCGTCACAAATATCGGTGATGATAAAAAACA  
TTATCGACGAACAACATATCCACAACAACAATAACAACAACATTGACAATATCATGAAAACTAT  
TCGAACCTGTATAACATTAACAAAGATCACAACAAAATTGCAATAATCTCCAAAATTGAGAAACC  
GTCCGCGATCAAAAAACATCGAAAATATCATCAAACCTGAGTGATGGCATCATGATTGCCCGCGGTG  
ATCTTGGCATAGAACTAACCTGAGTAACCTGCCTATCCTGCAAAAAAATTGATTAACCTCTGC  
CGCATAAAATACAATAAACCGGTGATTGTGGCGACCCAGATGATGGAAAGCATGCGTTTCTCTCC  
ATCGCCGACCCGTGCGGAAGTGACCGATGTGGCGACCGCCCTGTACGACGGCTCTGATTGCGTGA  
TGTTATCCGCCGAAACTGCGACGGGCCAGTACCCGATTCTGACAGTATCTACCCAGAACAAAATC  
ATCAAAGATGTTGAAAACGATTATTATTATTATGAGTACACCCAACGAAAAAATGATAAACTGAA  
AATGTTGGATCACAAAACAATTGCTGTCATGAGAACAAGATATCCAACAGATCAACAAATATA  
ATCATGAGTATATCCAGAACAACAATATGAGCAGGATATCCAGAATAACATTTCTTACTTTGAT  
AAACTAATCTTTAGCATTTCGCGACATTAGCAATAACATTAATCTGAAAAGCATAATACTGTTCTC  
TAATGAATTTAATAAAATTCAGAACTGAGCAATCTGCGTACGAAAGCGCCGATTATTGTCATCA  
CCGAGAACAATAATCTCGCCCGCAAACCTGCAGCTGACCTGGGGCATTATCCACACCTTTCCAAA  
AAACAGAACCTGTTTAATCATGACTTGTTCGCTGATCAATTATGGCTGTGACGTGTCAAAAAA  
AGAGGGTTTCGTGAACAGCCCTGATGAATATTGTTAGTTACTTTTTCAAAAAATATTAATTCAG  
CAAATCTGTTATATCTGTGTCAGCCGTGCCTCACCAAC*Taagtcc*
