# Supplementary material for: The NTP generating activity of pyruvate kinase II is critical for apicoplast maintenance in Plasmodium falciparum
Source: eLife journal article supplement (doi:10.7554/elife.50807), 2020-08-20
Supplement: supp [file elife-50807-supp-v1.zip]

A MKILLLCIIFLYYVNAFKNTQKDGVS LQILKKKRSNQVNFLNRKNDYNLI  
KNKNPSGMEDAKNIKKGPAPFYPLEDGTAGEQLHKAMKRYALVPGTIAFT  
DAHIEVNITYAEYFEMSVRLAEAMKRYGLNTNHRIVVCSENSLQFFMPVL  
GALFIGVAVAPANDIYNERELLNSMNISQPTVVFVSKKGLQKILNVQKKL  
PIIQKIIIMDSKTDYQGFQSMYTFVTSHLPPGFNEYDFVPESFDRDKTIA  
LIMNSSGSTGLPKGVALPHRTACVRFSHARDPIFGNQIIPDTAILSVPVF  
HHGFGMFTTLGYLICGFRVVLMYRFEELFLRSLQDYKIQSALLVPTLFS  
FFAKSTLIDKYDLNLHEIASGGAPLSKEVGEAVAKRFHLPGIRQGYGLT  
ETTSAILITPEGDDKPGAVGVVPFFEAKVVDLDTGKTLGVNQRGELCVR  
GPMIMSGYVNNPEATNALIDKDGWLHSGDIAWDEDEHFFIVDRLKSLIK  
YKGYQVAPAELESILLQHPNIFDAGVAGLPDDDAGELPAAVVLEHGKTM  
TEKEIVDYVASQVTTAKKLRGGVVFVDEV PKGLTGKLDARKIREILIKAK  
KGGKSLRTSKGEEDNMAIIKEFMRFKVHMEGSVNGHEFEIEGEGEGRPY  
EGTQTAKLKVTKGGPLPFAWDILSPQFMYGSKAYVKHPADIPDYLKLSFP  
EGFKWERVMNFEDGGVVTVTQDSSLQDGEFIYKVKLRGTNFPSDGPVMQK  
KTMGWEASSERMYPEDGALKGEIKQRLKLKDGGHYDAEVKTTYKAKKPVQ  
LPGAYNVNIKLDITSHNEDYTIVEQYERAEGRHSTGGMDELYKYPYDVPD  
YA-

B gggcccactgtctggcaaggcagagaaaaggtcgatacggacggaatgtgatggccttgccag  
tacgatgtactgtccagaggcagagaaaaggtcgatacggacggaatgtgatggcctctggac  
aacctgtaagacgtaggaggcagagaaaaggtcgatacggacggaatgtgatggcctcctacg  
caagatagcatacgctgaggcagagaaaaggtcgatacggacggaatgtgatggcctcagcgt  
ttcatagagtcgagtcaggcagagaaaaggtcgatacggacggaatgtgatggcctggactc  
gattccttgatagcgagaggcagagaaaaggtcgatacggacggaatgtgatggcctctcgct  
actgaacttgatcctccaggcagagaaaaggtcgatacggacggaatgtgatggcctggagga  
cttcatttgacagacgaaggcagagaaaaggtcgatacggacggaatgtgatggccttcgtcg  
tagctagaactcacgtgaggcagagaaaaggtcgatacggacggaatgtgatggcctcacgtg  
tgtctactgaacagagcaggcagagaaaaggtcgatacggacggaatgtgatggcctgctctg  
actgacccggg
