# Supplementary material for: The NTP generating activity of pyruvate kinase II is critical for apicoplast maintenance in Plasmodium falciparum
Source: eLife journal article supplement (doi:10.7554/elife.50807), 2020-08-20
Supplement: supp [file elife-50807-supp-v1.zip]

A

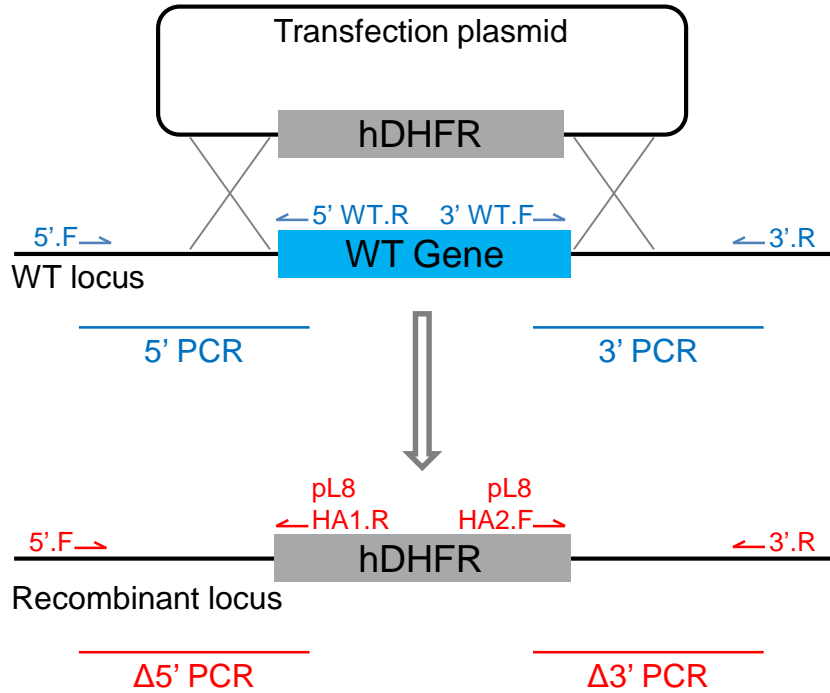

B

| Gene Deletion Genotype PCR Reactions |              |                    |          |                     |
|--------------------------------------|--------------|--------------------|----------|---------------------|
| Lane                                 | PCR Reaction | Primer Combination |          | Parasite Line       |
| 1                                    | Δ5'          | 5'.F               | pL8HA1.R | Gene deletion line  |
| 2                                    | Δ3'          | pL8HA2.F           | 3'.R     |                     |
| 3                                    | 5' WT        | 5'.F               | 5'WT.R   |                     |
| 4                                    | 3' WT        | 3'WT.F             | 3'.R     |                     |
| 5                                    | Δ5'          | 5'.F               | pL8HA1.R | PfMev parental Line |
| 6                                    | Δ3'          | pL8HA2.F           | 3'.R     |                     |
| 7                                    | 5' WT        | 5'.F               | 5'WT.R   |                     |
| 8                                    | 3' WT        | 3'WT.F             | 3'.R     |                     |

C

| Expected Amplicon Sizes (bp) |         |         |           |           |
|------------------------------|---------|---------|-----------|-----------|
| Line                         | Δ5' PCR | Δ3' PCR | 5' WT PCR | 3' WT PCR |
| oTPT                         | 562     | 776     | 614       | 816       |
| iTPT                         | 508     | 668     | 528       | 744       |
| TPI                          | 539     | 730     | 584       | 780       |
| PyrKII                       | 597     | 768     | 749       | 909       |
| PDH E2                       | 525     | 639     | 1,008     | 816       |
| DXS                          | 476     | 406     | 612       | 468       |
