# Supplementary material for: The NTP generating activity of pyruvate kinase II is critical for apicoplast maintenance in Plasmodium falciparum
Source: eLife journal article supplement (doi:10.7554/elife.50807), 2020-08-20
Supplement: supp [file elife-50807-supp-v1.zip]

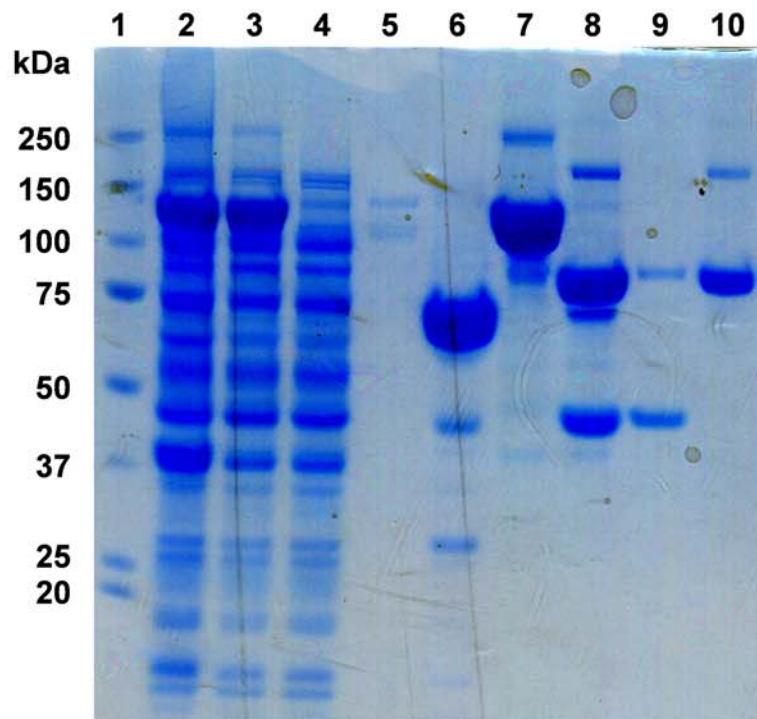

| Lane | Sample                     |
|------|----------------------------|
| 1    | Ladder                     |
| 2    | Whole cell lysate          |
| 3    | Column input (Supernatant) |
| 4    | MBP column flow through    |
| 5    | MBP column wash            |
| 6    | MBP-TEV                    |
| 7    | MBP-His-PyrKII             |
| 8    | Cleaved His-PyrKII         |
| 9    | Nickle column flow through |
| 10   | Purified His-PyrKII        |
