# Supplementary material for: The NTP generating activity of pyruvate kinase II is critical for apicoplast maintenance in Plasmodium falciparum
Source: eLife. 2020 Aug 20;9:e50807. doi: 10.7554/eLife.50807 (PMC7556864; doi:10.7554/eLife.50807)
Supplement: Supplementary file 1. [file elife-50807-supp1.xls]

## Sheet: Sheet1
Primers used to amplify homology arms for gene knockout plasmids
	Primer Name	Primer Sequence
	PyrKII.HA1.F	GCCACGAGCGGCCTATGATAAATTTTATAAGCAAGGAAG
	PyrKII.HA1.R	AAGCGCAGCGGCCTGTTTTGGTTACCTAATGAATTC
	PyrKII.HA2.F	CGACAGACGCCGGTTTCTGTATTCCTAATATGATTATGCC
	PyrKII.HA2.R	GGCCACCAGCCGGTAAATTGGATAAATTCGTTTCGATTC
	iTPT.HA1.F	GCCACGAGCGGCCCATATAAATATTATGCCTTGCCCAACC
	iTPT.HA1.R	AAGCGCAGCGGCCTTCCTATTAATTTGTGAAGGACGTTTG
	iTPT.HA2.F	CGACAGACGCCGGGTGCTGGTGCTATTAGTTTTGTTCATA
	iTPT.HA2.R	GGCCACCAGCCGGCTGTGCTTGCAACAGCATGTGTAATAT
	oTPT.HA1.F	GCCACGAGCGGCCATTATACACGCTTAAATAAATAGAATG
	oTPT.HA1.R	TAAGCGCAGCGGCCGGGGATTTTTTTCATTCCACTTATCC
	oTPT.HA2.F	CGACAGACGCCGGTTGGTGTGCAACCTTATCAAATTTTGG
	oTPT.HA2R	GGCCACCAGCCGGAATGTCATCGTTAAAATGCCACAATTC
	TPI.HA1.F	GCCACGAGCGGCCCCATTATGGTGATATTTGTTCATCTTG
	TPI.HA1.R	AAGCGCAGCGGCCGTTCATCATGGGTTAATATATTTTCCA
	TPI.HA2.F	CGACAGACGCCGGTGCTATAGGTACAGGACAACCTGTATC
	TPI.HA2.R	GGCCACCAGCCGGCACAGGGAAAATATGCTAATGATCTAC
	PDHE2.HA1.F	GCCACGAGCGGCCCGTGGAAGCATTTGATGAAGGTATAAC
	PDHE2.HA1.R	AAGCGCAGCGGCCTCCACTTCTATGGTGCTTTTATCATCC
	PDHE2.HA2.F	CGACAGACGCCGGATTACCAGATTCTCTATTAACTCCTGT
	PDHE2.HA2.R	GGCCACCAGCCGGCAATACTTCCAATATTTGTGCCGATTG
	DXS.HA1.F	GCCACGAGCGGCCGAATAGGTTGTCAAGGAAAAATTCGTTATG
	DXS.HA1.R	AAGCGCAGCGGCCATTAGCTAGTTTGTCCTGTTCATGTGAC
	DXS.HA2.F	CGACAGACGCCGGTGGTTTAACAGGTGGAATGGC
	DXS.HA2.R	GGCCACCAGCCGGAGCTCTTCTGTATTATTACCATTCACAACACC
Primers designed for In-Fusion insertion of gRNA sequences
	Primer Name	Oligonucleotide Sequence
	PyrKII.gRNA.F	TAAGTATATAATATTaatttaattgtaccctgtttGTTTTAGAGCTAGAA
	PyrKII.gRNA.R	TTCTAGCTCTAAAACaaacagggtacaattaaattAATATTATATACTTA
	iTPT.gRNA.F	TAAGTATATAATATTtctattatctgttattgctaGTTTTAGAGCTAGAA
	iTPT.gRNA.R	TTCTAGCTCTAAAACtagcaataacagataatagaAATATTATATACTTA
	oTPT.gRNA.F	TAAGTATATAATATTattttacttggatagcttttGTTTTAGAGCTAGAA
	oTPT.gRNA.R	TTCTAGCTCTAAAACaaaagctatccaagtaaaatAATATTATATACTTA
	oTPT.gRNA2.F	TAAGTATATAATATTtatcatatgaatatatcttgGTTTTAGAGCTAGAA
	oTPT.gRNA2.R	TTCTAGCTCTAAAACcaagatatattcatatgataAATATTATATACTTA
	TPI.gRNA.F	TAAGTATATAATATTtaatcatagcctttgagccaGTTTTAGAGCTAGAA
	TPI.gRNA.R	TTCTAGCTCTAAAACtggctcaaaggctatgattaAATATTATATACTTA
	PDHE2.gRNA.F	TAAGTATATAATATTgttaatataggaaatgcattGTTTTAGAGCTAGAA
	PDHE2.gRNA.R	TTCTAGCTCTAAAACaatgcatttcctatattaacAATATTATATACTTA
	DXS.gRNA.F	TAAGTATATAATATTattgctattataggagatggGTTTTAGAGCTAGAA
	DXS.gRNA.R	TTCTAGCTCTAAAACccatctcctataatagcaatAATATTATATACTTA
	PyrK.tetR.gRNA.F	TAAGTATATAATATTccatgtctaacaaattagcaGTTTTAGAGCTAGAA
	PyrK.tetR.gRNA.R	TTCTAGCTCTAAAACtgctaatttgttagacatggAATATTATATACTTA
	PyrK.CLD.gRNA.F	TAAGTATATAATATTtccattgccagaacctacaaGTTTTAGAGCTAGAA
	PyrK.CLD.gRNA.R	TTCTAGCTCTAAAACttgtaggttctggcaatggaAATATTATATACTTA
	Guide RNA sequences are in lower case text.
Primers used for confirmation of gene deletions
	Primer Name	Primer Sequence
	pl8HA1.R	TACAAAATGCTTAAGCGCAGCGGCC
	pl8HA2.F	CATATTTATTAAATCTAGAATTCGACAGACGCCG
	PyrKII.5'.F	GTTAATTGCATAAAAAAGAATAACAAACATATTGC
	PyrKII.3'.R	CCATCATTTGTGTTGCTACAATTACTGG
	PyrKII.5'WT.R	CCTTTTTTACTATATAATTTTCCACCTGTTAAAACTTGTA
	PyrKII.3'WT.F	GGGTACAATTAAATTATCCAGAATTAATAAAGAATGC
	iTPT.5’.F	GCTTATATTGTAAACAATGATTGTTATTGC
	iTPT.3’.R	CAAGAGAATATACAAATGTTCCACCAAC
	iTPT.5’WT.R	GGAATAGAAAAAACGGGTATATTAAATGC
	iTPT.3’WT.F	CCTTAATCAAAGGATTCCAAAAATACG
	oTPT.5’.F	CGTGAGACCTCAGATAAGTAAAT
	oTPT.3’.R	CTAAAACGATTTCTTAAATGTCAAAAGGAC
	oTPT.5’WT.R	GGTGGTGTTGTTTGTGCATC
	oTPT.3’WT.F	GGTGCTGTCATGGCTATGTC
	TPI.5'.F	GTGTATAATATTATGGGATTTAATATATATATGTGTG
	TPI.3'.R	GGAAGTCACGAAATAAAATTAAAAAAAAAAAAAGAATC
	TPI.5'WT.R	GCTTCCTCTTTTGATAAATAGCATTTCC
	TPI.3'WT.F	CCATATTTTATTTTCCCCAGCTTATC
	PDHE2.5'.F	GCCAGCTCTATCTAGTACCATGACG
	PDHE2.3'.R	CGCTGCTGCATGGGATCCATAG
	PDHE2.5'WT.R	GTCTAAATCTACGAACTGTCCTTCCTTGAC
	PDHE2.3'WT.F	CCGTTCCAGTGTTCCGTGTTACTC​
	DXS.5'.F	GAACTTTGTACCAGTTGTTCTATACATTCTCC
	DXS.3'.R	CGATTTTTTTGTACGTACATGAAGAACAGTAGC
	DXS.5'WT.R	GTGCAATTTTTTTTTTTATAGGCCTTATGCAG
	DXS.3'WT.F	CCTTCAGATGTGGTAGGAAGAGAAAATACG
Primers used to detect genes from the nuclear and organellar genomes
	Primer Name	Primer Sequence
	LDH.F	GGAGATGTAGTTTTGTTCGATATTG
	LDH.R	CTTGTAAAGGGATACCACCTACAG
	SufB.F	CATGTAGCTATAGTAGAAATAATAGTAAAAGATTATGG
	SufB.R	GACTCTGAAATACTTAAACCACGTTGC
	Cox1.F	CTTCATCTTTAAGAATAATTGCACAAGAAAATGTAAATC
	Cox1.R	GTACATATGATGTACCCATACTAAGCTTCC
Primers for In-Fusion cloning of harmonized PyrKII into the pMAL-cHT expression plasmid
	Primer Name	Primer Sequence
	PfPyrKIIpMAL.F	ATCACCATCACGAATTCATGGGCAGTGGAAACGGCTCAGG
	PfPyrKIIpMAL.R	CGGCCAGTGCCAAGCTTAGTTGGTGAGGCACGGCTGACAC
	Endonuclease sites are marked in bold.
Primers used for generation of the PyrKII-TetR-DOZI line
	Primer Name	Primer Sequence
	PyrKtetR.HA1.F	GATATCGTCCACCTGGATATCGAGCAAGATATTCAAAATAATATATCCTATTTTG
	PyrKtetR.HA1.R	CATAAGGATAGACGTCATTTGTTAGACATGGTTGACATAAATAAAGTAA
	PyrKtetR.HA2.F	CCCTTTCCGGGCGCGCCTTCATCTTACACATATTTATGTGCC
	PyrKtetR.HA2.R	GATATCCAGGTGGACGATATCCTTTCATAACAACATAGGATTATTAATTATGAGG
Primers used for generation of the CLD-PyrKII line
	Primer Name	Primer Sequence
	PyrKCLD.HA2.F	TTGCTAAAGTTAGAAGGTTCTGGCAATGGATCGGGGGATT
	PyrKCLD.HA2.R	TTACGCCGCGGCCGCGCCCTTGAATATCACCCAATATCCC
	PyrK.pRS.HA1.F	GCGGCCGTGCCACGAGCGGCCGACGCGTAAAGTAAATGAT
	PyrK.pRS.HA2.R	AAATGCTTAAGCGCAGCGGCCGCGCCCTTGAATATCACCC
Insertion validation primers for the CLD-PyrKII line
	Primer Name	Primer Sequence
	PyrK.CLD.5.F	CGTATATTGAAATGGGCCCTACATAGAAATATTTATAGG
	PyrK.CLD.3.R	CATTTTCATTTATTTGATTTTTTTCAAATTCTCCTATTC
	PyrK.CLD.WT5.R	GTTATTCTTTTTTATGCAATTAACATAACATTTTATTACT
	PyrK.CLD.WT3.F	CCTATGATAAATTTTATAAGCAAGGAAGTAATACCATTG
	CLD.F	CAAGTAGGGATAGAAATAAACCATTTAAATTTATGCTAG
	CLD.R	CTTGTTTTCCTAGCATAAATTTAAATGGTTTATTTCTATC
RT-qPCR primers
	Primer Name	Primer Sequence
	ClpM.F	GTGGGCCTAGTGGTACTGGTAAA
	ClpM.R	CCAACATAACCAGGAGGTGAACCTA
	EFTu.F	AGGTACTATAGGGCATGTAGATCA
	EFTu.R	CTGGAGCTGAATCAATATCTG
	LSUrna.F	GCACCTCGATGTCGGCTTATCGC
	LSUrna.R	ATATGGACCGAACTGTCTCACGACG
Primer sequences used for generation of the CLD-PyrKII api-Luciferase line
	Primer Name	Primer Sequence
	p230HA1.F	GTCGACGGCGCGCCGTCGACATAAGTTTAAATTGTCCTAATGGGAATATTAATCC
	p230HA1.NotI.R	AACGTCTCGCGGCCGCTATGGAATAATGATTTTGTGTAAAATCACAAATATATG
	p230HA2.NotI.F	GCCCTCTCGCGGCCGCGATCTAGGTTCTTTTGATAAATTCAAAATCAAATGTCC
	p230HA2.R	GTCGACGGCGCGCCGTCGACGATGATTCTAACGTTGAAGCTGACGATAATG
	p230p.gRNA.F	TAAGTATATAATATTtatagatgtaatatagatctGTTTT
	p230p.gRNA.R	TTCTAGCTCTAAAACagatctatattacatctataAATAT
	Endonuclease sites are marked in bold. Guide RNA sequences are in lower case text.
Insertion validation primers for the CLD-PyrKII api-luciferase line
	Primer Name	Primer Sequence
	p15int.F	GTTGGAACCTCTTACGTGCCG
	p230up.F	GGTTGTGATTTTTCAGGTGATTCC
	p15int.R	GGGTTTCGCCACCACTGATTTG
	p230down.R	GAAAATTGTAGGGGCAGCTAAATCCGAC
