# Supplementary material for: The NTP generating activity of pyruvate kinase II is critical for apicoplast maintenance in Plasmodium falciparum
Source: eLife. 2020 Aug 20;9:e50807. doi: 10.7554/eLife.50807 (PMC7556864; doi:10.7554/eLife.50807)
Supplement: Supplementary file 2. [file elife-50807-supp2.xls]

## Sheet: All genes
Column #	PrimaryAccession	ProbeID	Description	New Gene ID	Aliaes	Alias 2	Alias 3	Alias 4	Genomic Location (Gene)	Product Description	p-value(Time)	p-value(Treatment)	p-value(Time * Treatment)	p-value(Time 08 * PyrkII CLD vs. Time 0 * Control)	Fold-Change(Time 08 * PyrkII CLD vs. Time 0 * Control)	p-value(Time 16 * PyrkII CLD vs. Time 08 * Control)	Fold-Change(Time 16 * PyrkII CLD vs. Time 08 * Control)	p-value(Time 24 * PyrkII CLD vs. Time 16 * Control)	Fold-Change(Time 24 * PyrkII CLD vs. Time 16 * Control)	p-value(Time 32 * PyrkII CLD vs. Time 24 * Control)	Fold-Change(Time 32 * PyrkII CLD vs. Time 24 * Control)	p-value(Time 40 * PyrkII CLD vs. Time 32 * Control)	Fold-Change(Time 40 * PyrkII CLD vs. Time 32 * Control)	p-value(Time 48 * PyrkII CLD vs. Time 40 * Control)	Fold-Change(Time 48 * PyrkII CLD vs. Time 40 * Control)	p-value(Time 56 * PyrkII CLD vs. Time 48 * Control)	Fold-Change(Time 56 * PyrkII CLD vs. Time 48 * Control)	F(Time)	SS(Time)	F(Treatment)	SS(Treatment)	F(Time * Treatment)	SS(Time * Treatment)	SS(Error)	F(Error)
1123	1396.pre-tRNA-Pro-1	1396.PRE-TRNA-PRO-1_v7.1_P1/1NU	product unspecified	PF3D7_1418400	1396.pre-tRNA-Pro-1				Pf3D7_14_v3:778,092..778,163(+)	tRNA Proline	0.143376	0.810308	0.00710043	0.483987	-1.35792	0.776579	1.13165	0.289402	1.59251	0.466913	1.37454	0.897826	1.05753	0.521479	-1.32322	0.292174	-1.63975	1.69511	7.91421	0.0585176	0.03903	3.85643	12.8608	22.6773	1
3793	1399.pre-tRNA-Leu-1	1399.PRE-TRNA-LEU-1_v7.1_P1/1	product unspecified	PF3D7_1103300	1399.pre-tRNA-Leu-1				Pf3D7_11_v3:144,841..144,939(-)	tRNA Leucine	0.437296	2.77952e-07	0.169663	0.000850853	-3.48467	0.0140255	-2.42001	0.0170365	-2.35395	0.0197451	-2.30434	0.16492	-1.62298	0.0326218	-2.13851	0.000585117	-3.98768	1.01667	2.95622	40.7001	16.9066	1.66534	3.45886	14.1234	1
2203	2277.pre-tRNA-Pro-1	2277.PRE-TRNA-PRO-1_v7.1_P1/1	product unspecified	PF3D7_1216800	2277.pre-tRNA-Pro-1				Pf3D7_12_v3:666,884..666,955(+)	tRNA Proline	0.000885649	0.0167093	0.000304344	0.0157843	-1.87916	0.189084	-1.39473	0.263598	-1.32604	0.760148	-1.0794	0.488553	-1.18986	0.154708	-1.43524	3.104e-05	-3.576	4.71211	7.25341	6.33624	1.39335	6.31034	6.93826	7.47665	1
3423	2277.pre-tRNA-Val-1	2277.PRE-TRNA-VAL-1_v7.1_P1/1NU	product unspecified	PF3D7_1251900	2277.pre-tRNA-Val-1				Pf3D7_12_v3:2,112,878..2,112,950(+)	tRNA Valine	0.302328	0.0114749	0.410924	0.134979	-1.7937	0.845451	-1.07783	0.644358	-1.1945	0.275795	-1.52602	0.149947	-1.75433	0.345008	-1.44113	0.00101235	-4.33648	1.25318	4.55765	7.14276	3.71103	1.0388	2.69856	17.6647	1
724	A-type_18S:rRNA	A-type_18S_p	ncRNA	?	?	?	?	?	?	?	0.704931	0.338427	0.193002	0.453257	-1.44551	0.88806	-1.0713	0.703873	1.20461	0.757066	1.16351	0.469264	-1.4268	0.30235	-1.663	0.048074	-2.89983	0.658506	3.87915	0.942758	0.793376	1.57691	6.63522	28.6126	1
2147	A-type_28S:rRNA	A-type_28S_p	ncRNA	?	?	?	?	?	?	?	0.132646	7.27772e-07	0.0137756	0.000639601	-3.25249	0.0326937	-2.01049	0.0454026	-1.9184	0.123997	-1.63997	0.0187212	-2.16936	0.000822929	-3.16212	3.43455e-05	-4.94508	1.73982	4.27443	36.6797	12.8737	3.38356	5.93773	11.9331	1
3653	DsRed	DSRED_v7.1_P1/1	DsRed	?	?	?	?	?	?	?	0.902344	0.000574639	0.657242	0.0759276	-5.37958	0.0734703	-5.4608	0.359025	-2.35046	0.295717	-2.65414	0.161915	-3.72147	0.0625852	-5.86866	0.00196563	-27.0025	0.388886	8.20546	14.4285	43.4913	0.658463	9.92393	102.485	1
1084	Fluciferase	FLUCIFERASE_v7.1_P1/2	Firefly luciferase	?	?	?	?	?	?	?	0.0174485	0.0960057	0.280401	0.322347	-2.06522	0.673407	-1.35938	0.119813	3.16559	0.567071	1.51802	0.82514	1.17444	0.439862	1.75846	0.654612	1.41686	2.89434	37.7003	2.93093	5.45386	1.31657	12.2493	63.267	1
540	mal_mito_1	mal_mito_1_v6.4_P1/1	product unspecified	mal_mito_1	mal_mito_1				Pf_M76611:734..1,521(-)	cytochrome c oxidase subunit 3	8.74162e-13	0.00104821	5.16482e-14	3.0577e-05	3.59893	8.05755e-05	3.29801	0.000499834	-2.78771	0.000243209	-2.98115	0.00172122	-2.47634	0.640672	-1.1337	0.701895	1.11622	30.0726	53.3237	12.8432	3.25331	44.8434	56.7962	8.61251	1
2016	mal_mito_2	mal_mito_2_v6.4_P1/2	product unspecified	mal_mito_2	mal_mito_2				Pf_M76611:1,945..3,471(+)	cytochrome c oxidase subunit 1	1.40953e-15	2.95869e-07	1.39423e-13	7.17527e-05	3.1141	0.0160547	1.89096	9.85025e-05	-3.03079	0.000355061	-2.71176	0.00535509	-2.11293	0.0660486	-1.61204	0.317724	-1.31332	46.485	73.3916	40.4321	9.11932	41.8757	47.2246	7.66857	1
2113	mal_mito_3	mal_mito_3_v6.4_P2/2	product unspecified	mal_mito_3	mal_mito_3				Pf_M76611:3,492..4,622(+)	cytochrome b	8.65264e-13	0.025084	8.78728e-13	6.79608e-05	3.79836	3.95029e-05	4.00911	0.0142179	-2.13897	0.0125095	-2.17244	0.0474974	-1.83111	0.473612	-1.23762	0.660892	-1.14933	30.0941	65.0507	5.49245	1.69605	36.8114	56.836	10.4991	1
2344	mal_rna_10:rRNA	mal_rna_10:rRNA_v6.4_P1/1	mitochondrial rRNA	mal_rna_10	mal_rna_10:rRNA				Pf_M76611:1,830..1,910(+)	unspecified product	0.00065584	1.39819e-07	3.38418e-05	0.235948	-1.43033	0.489003	-1.2306	0.0300563	-1.95747	0.0173942	-2.0995	0.00126899	-2.83652	0.00151803	-2.78211	0.000139908	-3.89827	4.90886	10.789	43.7149	13.7256	8.27413	12.9896	10.6754	1
330	mal_rna_11:rRNA	mal_rna_11:rRNA_v6.4_P1/1	mitochondrial rRNA	mal_rna_11	mal_rna_11:rRNA				Pf_M76611:1,916..2,023(-)	unspecified product	0.000718778	5.10739e-11	1.07431e-05	0.00449048	-2.00056	0.0429767	-1.61459	0.00977603	-1.8659	0.000421648	-2.43597	0.000259438	-2.5319	1.08315e-05	-3.23626	1.07327e-06	-4.23569	4.84854	6.28688	88.9558	16.4778	9.3982	8.70443	6.29803	1
1531	mal_rna_14:rRNA	mal_rna_14:rRNA_v6.4_P1/1	mitochondrial rRNA	mal_rna_14	mal_rna_14:rRNA				Pf_M76611:5,026..5,201(-)	unspecified product	5.0341e-06	1.27952e-15	0.000148453	6.37717e-05	-2.40734	0.000354842	-2.14857	4.53787e-06	-2.85609	2.5808e-06	-2.96167	1.17509e-06	-3.11554	1.67394e-06	-3.04534	1.6982e-06	-3.28547	8.5659	7.94776	194.282	25.7518	6.92673	4.59063	4.50664	1
2322	mal_rna_15:rRNA	mal_rna_15:rRNA_v6.4_P1/1	mitochondrial rRNA	mal_rna_15	mal_rna_15:rRNA				Pf_M76611:5,379..5,446(-)	unspecified product	1.88916e-10	1.43381e-12	4.02963e-07	0.0457666	-1.8718	0.00233473	-2.7043	1.61758e-07	-7.272	0.00117866	-2.91733	0.0108815	-2.25815	0.00137727	-2.86787	0.00045521	-3.50529	20.3803	46.528	117.427	38.2977	13.0475	21.2765	11.0888	1
1619	mal_rna_17:rRNA	mal_rna_17:rRNA_v6.4_P1/1	mitochondrial rRNA	mal_rna_17	mal_rna_17:rRNA				Pf_M76611:5,577..5,771(-)	unspecified product	4.35456e-06	6.62161e-12	2.24675e-08	0.232965	-1.26924	0.577839	-1.11664	0.00107993	-2.01672	4.78308e-05	-2.49426	2.03388e-06	-3.06966	3.26245e-06	-2.97607	4.22048e-07	-3.70427	8.69033	8.36612	104.497	14.3713	16.8758	11.6045	4.67594	1
3697	mal_rna_18:rRNA	mal_rna_18:rRNA_v6.4_P1/1	mitochondrial rRNA	mal_rna_18	mal_rna_18:rRNA				Pf_M76611:5,772..5,854(-)	unspecified product	3.85687e-10	2.96683e-11	5.77978e-08	0.674471	-1.12856	0.00391793	-2.41967	7.68027e-07	-5.60493	0.00341479	-2.45603	0.00928993	-2.19742	0.00362175	-2.44043	0.0136212	-2.21245	19.3075	39.2931	92.9071	27.011	15.5518	22.607	9.88488	1
3809	mal_rna_19:rRNA	mal_rna_19:rRNA_v6.4_P1/1	mitochondrial rRNA	mal_rna_19	mal_rna_19:rRNA				Pf_M76611:5,855..5,954(-)	unspecified product	0.000482675	1.08085e-07	0.00129328	0.183146	-1.52862	0.151203	-1.5818	0.00135337	-2.97513	0.0220998	-2.11492	0.0951963	-1.70919	0.0082906	-2.4002	0.000609963	-3.52934	5.11265	12.4543	44.8766	15.6169	5.13613	8.93677	11.8319	1
3889	mal_rna_9:rRNA	mal_rna_9:rRNA_v6.4_P1/1	mitochondrial rRNA	mal_rna_9	mal_rna_9:rRNA				Pf_M76611:1,698..1,763(+)	unspecified product	4.3111e-07	2.19195e-14	0.00696207	0.000118444	-4.51035	5.69412e-06	-6.42687	3.98413e-07	-8.7465	0.00179375	-3.23493	0.00173738	-3.24812	6.12017e-05	-4.87571	4.08133e-06	-7.61496	10.8181	32.4429	159.322	68.2566	3.87066	8.29133	14.5663	1
1698	MAL1_18s	MAL1_18S_v7.1_P1/3NU	product unspecified	PF3D7_0112300	MAL1_18s				Pf3D7_01_v3:473,739..475,887(+)	18S ribosomal RNA	0.140772	1.55528e-06	0.0212198	0.00360781	-2.76433	0.058168	-1.89176	0.130447	-1.65525	0.0999933	-1.73299	0.00850917	-2.48002	0.000885144	-3.27103	0.000113348	-4.55592	1.70566	4.50448	33.6675	12.7018	3.08152	5.81286	12.8273	1
641	MAL1_28s	MAL1_28S_v7.1_P3/4	product unspecified	PF3D7_0112700	MAL1_28s				Pf3D7_01_v3:477,279..481,382(+)	28S ribosomal RNA	0.000284144	3.03477e-05	2.76107e-05	0.758329	-1.07597	0.365825	-1.24158	0.00665323	-1.97867	7.31659e-06	-3.48266	0.0350224	-1.67934	0.181576	-1.37986	0.257697	1.33714	5.4723	7.61763	23.1255	4.59878	8.46828	8.42011	6.76132	1
3800	MAL1_5.8s	MAL1_5.8S_v7.1_P1/1NU	product unspecified	?	?	?	?	?	?	?	0.627138	0.00169394	0.74859	0.202274	-1.94517	0.207886	-1.92892	0.392355	-1.55791	0.315725	-1.68386	0.0942327	-2.41325	0.274669	-1.76501	0.167074	-2.1649	0.756152	4.94549	11.6221	10.8589	0.534552	2.49725	31.7674	1
2340	MAL1_5.8S:rRNA	S1-type_5.8S_p	ncRNA	PF3D7_0112500	MAL1_5.8S:rRNA, MAL1_5.8s	MAL1_5.8s			Pf3D7_01_v3:476,287..476,428(+)	5.8S ribosomal RNA	0.498033	2.57579e-06	0.758151	0.00220158	-4.89346	0.0200321	-3.22174	0.0928814	-2.2907	0.0600483	-2.54095	0.0728954	-2.42849	0.135491	-2.08137	0.0194484	-3.5154	0.927498	5.32368	31.7411	26.0269	0.521594	2.13847	27.8792	1
3164	MAL1_ITS2	MAL1_ITS2_v7.1_P1/1	product unspecified	PF3D7_0112600	MAL1_ITS2				Pf3D7_01_v3:476,429..477,278(+)	unspecified product	8.31977e-08	0.00118698	1.43655e-06	0.0107108	2.58864	0.647724	-1.17629	0.000716952	-3.70661	0.00223951	-3.20385	0.540704	-1.24315	0.231049	1.53648	0.441406	1.34081	12.5114	38.7609	12.5231	5.54247	11.5531	25.5659	15.0477	1
950	MAL11/13_5.8S:rRNA	S2-type_5.8S_p	ncRNA	?	?	?	?	?	?	?	0.776426	6.34192e-10	0.50435	9.32634e-06	-13.8559	0.000891341	-6.29392	0.00975389	-3.98753	0.0150694	-3.64452	0.00465461	-4.61917	0.00166649	-5.61227	0.000536725	-7.87818	0.56809	3.61987	72.2013	65.7237	0.880955	4.0096	30.9497	1
268	MAL11_rRNA	MAL11_RRNA_v7.1_P6/7	product unspecified	PF3D7_1148600	MAL11_rRNA				Pf3D7_11_v3:1,925,995..1,928,144(+)	18S ribosomal RNA	0.194605	0.588008	0.244326	0.673314	-1.31977	0.737717	1.24642	0.16857	2.50378	0.539186	1.49886	0.591998	-1.42332	0.433957	-1.67631	0.171735	-2.64779	1.51764	16.1343	0.299117	0.454281	1.41344	10.7332	51.6371	1
3011	MAL13_5.8SrRNA	MAL13_5.8SRRNA_v7.1_P1/1NU	product unspecified	PF3D7_1371200	MAL13_5.8SrRNA				Pf3D7_13_v3:2,802,527..2,802,686(+)	5.8S ribosomal RNA	0.117573	0.63459	0.149866	0.601453	-1.32934	0.597595	-1.33339	0.348949	-1.66999	0.8893	1.07866	0.0349946	3.27354	0.136814	2.27681	0.906345	1.07082	1.80889	13.1723	0.230006	0.239272	1.75003	9.10264	35.3697	1
663	MAL13_tRNA_Arg2	MAL13_TRNA_ARG2_v7.1_P1/1	product unspecified	PF3D7_1369800	MAL13_tRNA_Arg2				Pf3D7_13_v3:2,780,354..2,780,427(+)	tRNA Arginine	0.000959218	0.767279	0.000170642	0.000484136	-4.24885	0.00485415	-3.09456	0.726656	1.14126	0.750805	1.12752	0.666807	1.17682	0.0271621	2.37624	0.0224106	-2.60849	4.66033	16.3577	0.0889916	0.0446227	6.80527	17.0617	17.0485	1
2623	MAL13_tRNA_Arg3	MAL13_TRNA_ARG3_v7.1_P1/1	product unspecified	PF3D7_1370000	MAL13_tRNA_Arg3				Pf3D7_13_v3:2,781,622..2,781,695(+)	tRNA Arginine	9.39443e-07	1.73034e-06	3.53913e-05	0.000884986	-2.989	0.439647	-1.26481	0.0385605	-1.90905	0.00354279	-2.56381	0.00294006	-2.61865	0.000854433	-3.00033	0.000135089	-3.98181	10.0702	22.7009	33.2553	10.7095	8.23171	13.2546	10.9493	1
3391	MAL13_tRNA_Met1	MAL13_TRNA_MET1_v7.1_P1/1	product unspecified	PF3D7_1339100	MAL13_tRNA_Met1				Pf3D7_13_v3:1,575,356..1,575,427(+)	tRNA Methionine	0.210808	2.5285e-05	0.376444	0.0058871	-3.22912	0.0314863	-2.44725	0.0897026	-2.00734	0.0644814	-2.14313	0.335301	-1.47679	0.528972	-1.28884	0.00146465	-4.37773	1.47054	5.8446	23.7195	13.4675	1.10403	3.13422	19.3045	1
189	MAL13_tRNA_Pro1	MAL13_TRNA_PRO1_v7.1_P1/1NU	product unspecified	PF3D7_1339200	MAL13_tRNA_Pro1				Pf3D7_13_v3:1,576,926..1,576,997(-)	tRNA Proline	1.90499e-06	0.158589	1.32015e-09	0.31761	-1.34602	0.467758	1.24004	0.239682	1.41993	0.137526	1.5614	0.105383	-1.62805	0.00180498	-2.69642	0.0053804	-2.53782	9.41935	20.1926	2.07794	0.636365	21.3125	32.6344	10.4124	1
3651	MAL13_tRNA_Ser1	MAL13_TRNA_SER1_v7.1_P1/1	product unspecified	PF3D7_1337600	MAL13_tRNA_Ser1				Pf3D7_13_v3:1,524,111..1,524,192(-)	tRNA Serine	1.1123e-07	1.33311e-06	4.8654e-06	0.896751	1.04112	0.450297	-1.26544	0.182011	-1.52193	0.101069	-1.68123	0.000254295	-3.52162	0.0212953	-2.10479	0.0711442	-1.84756	12.2008	28.955	34.2678	11.6178	10.2174	17.3201	11.527	1
3754	MAL13_tRNA_Trp1	MAL13_TRNA_TRP1_v7.1_P1/1	product unspecified	PF3D7_1369900	MAL13_tRNA_Trp1				Pf3D7_13_v3:2,781,080..2,781,151(-)	tRNA Tryptophan	0.0163538	0.000746355	0.562302	0.018173	-2.0339	0.276209	-1.37242	0.176922	-1.48358	0.0131253	-2.11443	0.0322837	-1.89383	0.728332	-1.10538	0.000650978	-3.15221	2.93175	5.99216	13.7312	4.00929	0.792877	1.15753	9.92743	1
3189	MAL13_U6_snRNA	MAL13_U6_SNRNA_v7.1_P1/1	product unspecified	PF3D7_1341100	MAL13_U6_snRNA				Pf3D7_13_v3:1,632,602..1,632,709(-)	U6 spliceosomal RNA	0.513774	0.596208	0.0985952	0.777199	-1.19536	0.961638	1.03078	0.597311	1.39602	0.703787	1.2711	0.528187	-1.48991	0.480011	-1.56328	0.0437555	-4.05818	0.905506	8.85201	0.286106	0.399559	2.03398	14.2026	47.4823	1
726	MAL13P1.1	MAL13P1.1_v7.1_P5/7	erythrocyte membrane protein 1, PfEMP1	PF3D7_1300100	MAL13P1.1				Pf3D7_13_v3:21,364..28,787(+)	erythrocyte membrane protein 1, PfEMP1	0.000152534	8.65116e-10	6.19819e-08	1.9273e-10	-6.37778	1.87321e-11	-7.65812	0.0897921	-1.43644	0.651853	-1.09901	0.0489723	-1.52729	0.477075	-1.1608	0.000374993	-2.40004	5.90713	6.346	70.3034	10.7895	15.4567	11.8608	5.218	1
1524	MAL13P1.102	MAL13P1.102_v7.1_P2/3	conserved Plasmodium protein, unknown function	PF3D7_1318700	MAL13P1.102				Pf3D7_13_v3:770,646..772,895(-)	conserved Plasmodium protein, unknown function	3.31865e-10	2.28477e-08	2.41298e-11	0.247456	-1.6562	0.504924	-1.335	0.58741	1.26473	0.00410105	-3.74231	3.42749e-08	-20.9085	0.000305002	-5.60628	0.00913578	-3.55087	19.5297	89.6609	52.281	34.2888	28.9677	94.9935	22.2991	1
722	MAL13P1.103	MAL13P1.103_v7.1_P1/4	conserved Plasmodium protein, unknown function	PF3D7_1319400	MAL13P1.103				Pf3D7_13_v3:801,712..806,029(+)	conserved Plasmodium protein, unknown function	2.55093e-08	0.00256217	4.77823e-07	0.502703	1.22105	0.443651	1.25671	0.224294	-1.44035	0.00767655	-2.306	0.0266772	-1.97975	0.878308	-1.04653	0.200652	1.50875	13.8306	30.0213	10.6008	3.2872	12.8408	19.909	10.5431	1
3218	MAL13P1.105	MAL13P1.105_v7.1_P2/3	ser/thr protein phosphatase 2A regulatory subunit A, putative	PF3D7_1319700	MAL13P1.105				Pf3D7_13_v3:815,822..818,398(-)	protein phosphatase PP2A regulatory subunit A, putative	3.29194e-11	0.97725	8.59142e-09	0.0321706	1.82404	0.0410675	1.77064	0.105376	-1.56457	0.21381	-1.40615	0.465526	1.21968	0.0774521	1.63213	0.00114278	2.77825	23.2031	41.9523	0.000825239	0.000213153	18.2994	23.6329	8.78193	1
3635	MAL13P1.111	MAL13P1.111_v7.1_P1/1	ATP-dependent Clp protease adaptor protein ClpS, putative	PF3D7_1320100	MAL13P1.111				Pf3D7_13_v3:834,180..835,308(-)	ATP-dependent Clp protease adapter protein ClpS	4.696e-11	3.5261e-07	3.00254e-08	0.466493	1.31514	0.949103	1.02421	0.000458541	-4.23139	0.00215603	-3.43827	0.0185593	-2.50888	0.294574	-1.48584	0.478713	-1.32953	22.6057	78.118	39.6847	19.5911	16.4618	40.6333	16.7848	1
1137	MAL13P1.114	MAL13P1.114_v7.1_P5/10	conserved Plasmodium protein, unknown function	PF3D7_1321100	MAL13P1.114				Pf3D7_13_v3:861,442..872,332(-)	conserved Plasmodium protein, unknown function	8.48376e-13	0.0888402	4.98934e-14	0.0245541	2.45951	0.00854695	2.90869	0.00324908	3.35758	0.024544	-2.45968	8.29714e-06	-7.43049	0.189136	-1.66952	0.994004	-1.0031	30.1356	110.118	3.06849	1.60179	44.9499	117.322	17.7484	1
3846	MAL13P1.115	MAL13P1.115_v7.1_P1/1	conserved protein, unknown function	PF3D7_1321200	MAL13P1.115				Pf3D7_13_v3:875,265..875,847(+)	conserved protein, unknown function	0.336841	0.000595542	0.28128	0.00929051	-3.03079	0.0286792	-2.50582	0.310629	-1.51255	0.390755	-1.41837	0.0079016	-3.11063	0.596733	-1.23953	0.0221762	-2.80158	1.18582	4.78719	14.3325	8.26579	1.31435	3.79005	19.6084	1
129	MAL13P1.116	MAL13P1.116_v7.1_P6/10	conserved Plasmodium membrane protein, unknown function	PF3D7_1321300	MAL13P1.116				Pf3D7_13_v3:876,221..886,264(-)	conserved Plasmodium membrane protein, unknown function	4.3753e-09	1.09553e-07	1.55189e-06	0.15424	1.19568	0.00336921	1.4721	0.000293325	1.64018	0.0470199	1.28759	0.00467921	1.44963	0.896675	-1.01618	0.796107	-1.03473	15.9732	6.00097	44.8153	2.40523	11.4658	3.07685	1.82478	1
3422	MAL13P1.117	MAL13P1.117_v7.1_P1/1	DHHC-type zinc finger protein, putative	PF3D7_1321400	MAL13P1.117				Pf3D7_13_v3:887,271..889,699(+)	palmitoyltransferase DHHC8, putative	0.000241958	0.947509	3.57676e-07	0.581895	1.15408	0.220351	1.37967	0.0829186	1.58493	0.090423	1.56709	0.723139	-1.09645	0.0196894	-1.87944	0.0299181	-1.86731	5.58331	9.26595	0.00439875	0.00104287	13.1933	15.6395	8.06082	1
2498	MAL13P1.118	MAL13P1.118_v7.1_P2/4	3',5'-cyclic nucleotide phosphodiesterase, putative	PF3D7_1321500	MAL13P1.118				Pf3D7_13_v3:890,106..894,782(-)	3',5'-cyclic nucleotide phosphodiesterase, putative	1.49117e-14	0.295327	1.42998e-14	9.01205e-06	3.76794	8.16348e-06	3.79974	0.0107234	1.98718	0.0369392	-1.73733	0.0305821	-1.77515	0.835054	1.05481	0.0242282	1.89894	39.7348	64.1926	1.12972	0.260727	48.9469	56.4821	7.84683	1
219	MAL13P1.120	MAL13P1.120_v7.1_P1/3	splicing factor, putative	PF3D7_1321700	MAL13P1.120				Pf3D7_13_v3:902,383..905,166(+)	splicing factor 1	0.0569924	1.1601e-05	0.404652	0.000244864	-7.42992	0.00549303	-4.26982	0.133342	-2.12283	0.103562	-2.2677	0.0113213	-3.70944	0.390174	-1.53121	0.00013986	-9.44079	2.21976	13.2835	26.3315	22.5105	1.05033	4.4896	29.0663	1
843	MAL13P1.121	MAL13P1.121_v7.1_P2/2	adenosine-diphosphatase, putative	PF3D7_1322000	MAL13P1.121				Pf3D7_13_v3:916,360..918,594(+)	nucleoside-diphosphatase, putative	1.94146e-12	0.051015	2.07392e-13	0.04032	1.69942	0.000932031	2.46434	0.00141839	-2.37293	0.00686172	-2.0462	0.269886	-1.32179	0.881404	-1.0381	0.549499	1.17439	28.4345	43.9392	4.09172	0.903265	40.7366	44.9639	7.50565	1
2691	MAL13P1.122	MAL13P1.122_v7.1_P1/8	SET domain protein, putative	PF3D7_1322100	MAL13P1.122				Pf3D7_13_v3:920,971..929,449(+)	histone-lysine N-methyltransferase SET2	2.36454e-09	0.272305	1.55871e-06	0.022238	-1.73427	0.808525	1.05773	0.314605	1.26437	0.746535	1.07776	0.357426	1.23913	0.280833	-1.28641	9.75711e-05	-2.95748	16.7741	22.1282	1.24515	0.234657	11.4609	10.7993	6.4075	1
794	MAL13P1.124	MAL13P1.124_v7.1_P6/10	conserved Plasmodium protein, unknown function	PF3D7_1322200	MAL13P1.124				Pf3D7_13_v3:931,314..943,825(+)	conserved Plasmodium protein, unknown function	4.81439e-15	0.00134616	5.19181e-10	0.000598259	1.89096	0.234961	1.22576	0.659097	-1.07781	0.119677	-1.30832	0.0795831	-1.35561	0.795889	-1.04487	0.914473	-1.01966	42.8535	30.3363	12.2018	1.23396	22.941	11.6001	3.4384	1
3169	MAL13P1.126	MAL13P1.126_v7.1_P1/2	DHHC-type zinc finger protein, putative	PF3D7_1322500	MAL13P1.126				Pf3D7_13_v3:953,154..955,789(+)	palmitoyltransferase DHHC5	1.63702e-11	0.573685	2.22039e-11	0.0025761	3.16304	0.00157285	3.37402	0.102934	1.80958	0.0208167	-2.35813	0.0374336	-2.15214	0.870319	-1.05994	0.298961	1.49042	24.4149	76.3734	0.322764	0.144236	29.1466	65.125	15.1939	1
2100	MAL13P1.128	MAL13P1.128_v7.1_P1/1	conserved Plasmodium protein, unknown function	PF3D7_1322800	MAL13P1.128				Pf3D7_13_v3:960,166..960,646(+)	conserved Plasmodium protein, unknown function	7.86141e-13	0.451152	8.05621e-12	0.000661875	3.09872	0.00221304	2.71519	0.014345	-2.17867	0.0929197	-1.68477	0.170514	1.52574	0.00594559	2.42416	0.0104235	2.39809	30.2963	68.8905	0.581063	0.188753	31.3985	50.9976	11.0446	1
2114	MAL13P1.13	MAL13P1.13_v7.1_P2/8	conserved Plasmodium protein, unknown function	PF3D7_1302500	MAL13P1.13				Pf3D7_13_v3:131,849..140,594(-)	conserved Plasmodium protein, unknown function	0.000694066	9.70539e-08	1.73533e-05	0.144683	-1.20648	0.00537144	1.45347	2.02078e-05	1.8623	0.562592	1.07629	0.00713387	1.43332	0.0005039	1.62162	0.539904	-1.08679	4.87154	1.92349	45.3677	2.55902	8.91968	2.51562	1.91781	1
3268	MAL13P1.130	MAL13P1.130_v7.1_P1/1	glideosome associated protein with multiple membrane spans 1	PF3D7_1323700	MAL13P1.130				Pf3D7_13_v3:982,611..983,801(+)	glideosome associated protein with multiple membrane spans 1	2.21153e-13	0.0294562	4.75784e-14	0.00503859	3.2488	0.00376395	3.39479	0.0281239	2.46235	0.00197618	-3.73269	7.59473e-05	-5.85647	0.154101	-1.77308	0.665808	1.20082	33.0803	127.542	5.16701	2.84594	45.0965	124.194	18.7269	1
2923	MAL13P1.131	MAL13P1.131_v7.1_P1/2	conserved Plasmodium membrane protein, unknown function	PF3D7_1324100	MAL13P1.131				Pf3D7_13_v3:997,721..999,262(+)	conserved Plasmodium membrane protein, unknown function	8.18085e-12	0.116592	3.0812e-08	0.00165223	2.78002	0.0316785	1.95476	0.748921	-1.10133	0.608881	1.16705	0.124361	1.60209	0.130249	1.59014	0.034452	2.0229	25.6681	57.3592	2.59287	0.827738	16.4252	26.2175	10.854	1
3352	MAL13P1.132	MAL13P1.132_v7.1_P2/2	micro-fibrillar-associated protein, putative	PF3D7_1324200	MAL13P1.132				Pf3D7_13_v3:1,000,100..1,001,882(-)	micro-fibrillar-associated protein, putative	0.0683146	1.47924e-05	0.237466	1.25392e-05	-7.37488	0.0054956	-3.19162	0.189763	-1.6882	0.0931625	-1.96612	0.0137142	-2.7658	0.557626	-1.26083	0.000232888	-5.59283	2.11723	8.09959	25.5034	13.9378	1.43333	3.91664	18.5813	1
3031	MAL13P1.134	MAL13P1.134_v7.1_P4/4	DEAD box helicase, putative	PF3D7_1324500	MAL13P1.134				Pf3D7_13_v3:1,023,260..1,027,743(-)	DEAD box helicase, putative	6.40969e-11	0.0699285	2.85108e-08	0.467186	1.28847	0.65791	-1.16647	0.0596269	-1.95753	0.165115	-1.63065	0.568397	1.21963	0.164402	1.63204	0.193269	1.63081	22.0925	65.5585	3.50178	1.48448	16.5352	35.0481	14.4133	1
2478	MAL13P1.135	MAL13P1.135_v7.1_P1/1	SNARE protein, putative	PF3D7_1324700	MAL13P1.135				Pf3D7_13_v3:1,034,900..1,035,637(+)	SNARE protein, putative	0.000152117	5.5695e-05	1.40243e-05	0.170476	1.31716	0.011683	1.68932	0.000215646	2.25845	0.182758	1.30677	0.988179	-1.00294	0.46711	1.15567	0.00788907	1.8108	5.90907	5.71179	21.1966	2.92699	9.13065	6.30415	4.69498	1
606	MAL13P1.137	MAL13P1.137_v7.1_P7/10	conserved Plasmodium protein, unknown function	PF3D7_1325400	MAL13P1.137				Pf3D7_13_v3:1,052,751..1,063,310(+)	conserved Plasmodium protein, unknown function	2.21786e-09	0.00697421	2.43032e-09	0.148112	1.73213	0.158383	1.7081	0.264208	1.52413	0.00138486	-3.64318	0.00557464	-3.00029	0.455509	-1.32343	0.996332	-1.00184	16.8591	58.0243	8.24894	4.05579	20.2944	49.8912	16.7169	1
3050	MAL13P1.139	MAL13P1.139_v7.1_P1/1	conserved Plasmodium protein, unknown function	PF3D7_1325600	MAL13P1.139				Pf3D7_13_v3:1,067,097..1,067,685(+)	mitochondrial fission 1 protein, putative	1.527e-13	0.0993978	9.13177e-13	8.46608e-05	3.18972	0.00018683	2.97266	0.00134489	-2.47982	0.0791606	-1.60082	0.29277	-1.32023	0.741558	1.09028	0.391527	1.27279	33.9331	57.2789	2.86983	0.692036	36.7113	44.2632	8.19884	1
1560	MAL13P1.139a	MAL13P1.139A_v7.1_P1/1	conserved Plasmodium protein, unknown function	PF3D7_1325700	MAL13P1.139a				Pf3D7_13_v3:1,068,050..1,068,635(-)	conserved Plasmodium protein, unknown function	2.94426e-14	0.113341	7.36083e-13	5.70807e-06	3.09705	0.0995326	1.42844	0.124639	-1.39312	0.927117	-1.01959	0.0745792	1.4731	0.00177192	2.04295	0.00114899	2.22396	37.9556	42.0362	2.6415	0.417927	37.2752	29.4876	5.37934	1
2405	MAL13P1.14	MAL13P1.14_v7.1_P2/5	DEAD/DEAH box ATP-dependent RNA helicase, putative	PF3D7_1302700	MAL13P1.14				Pf3D7_13_v3:145,174..150,198(+)	ATP-dependent RNA helicase DHR1, putative	9.14982e-14	9.64429e-06	9.25241e-09	0.614442	-1.09679	0.0882848	1.3756	0.334635	1.19464	0.0716894	1.40189	0.000603781	1.98786	0.655736	-1.08516	0.0971064	-1.39296	35.1433	28.984	26.9692	3.1775	18.1868	10.7138	4.00586	1
699	MAL13P1.140	MAL13P1.140_v7.1_P3/8	conserved Plasmodium protein, unknown function	PF3D7_1325900	MAL13P1.140				Pf3D7_13_v3:1,076,161..1,084,587(-)	conserved Plasmodium protein, unknown function	1.22895e-10	0.0119065	5.98393e-10	0.0341591	2.25364	0.0780097	1.9523	0.168317	-1.67904	0.00211375	-3.40422	0.10086	-1.86057	0.871272	1.06195	0.496106	1.311	21.0485	71.2538	7.06242	3.4154	22.6875	54.8586	16.4425	1
1861	MAL13P1.141	MAL13P1.141_v7.1_P1/1	conserved Plasmodium protein, unknown function	PF3D7_1326000	MAL13P1.141				Pf3D7_13_v3:1,085,786..1,086,861(-)	conserved Plasmodium protein, unknown function	7.67173e-11	0.220289	1.44874e-08	0.0123579	2.02087	0.0758007	1.62848	0.913904	-1.02943	0.386621	-1.26304	0.218649	-1.39612	0.964018	-1.01217	0.681742	1.12495	21.8003	38.6007	1.55936	0.394441	17.5158	22.1531	8.6003	1
3283	MAL13P1.142	MAL13P1.142_v7.1_P1/1	conserved Plasmodium protein, unknown function	PF3D7_1326100	MAL13P1.142				Pf3D7_13_v3:1,087,584..1,089,099(+)	WD repeat-containing protein, putative	0.055672	0.131016	0.0874321	0.0950779	2.17379	0.896907	1.06081	0.267379	1.66518	0.875507	1.07399	0.184704	1.8446	0.400436	1.46973	0.0645197	2.51853	2.23302	11.406	2.39456	1.74731	2.11522	7.71736	24.8098	1
371	MAL13P1.144	MAL13P1.144_v7.1_P2/2	translation initiation factor EIF-2B gamma subunit, putative	PF3D7_1326400	MAL13P1.144				Pf3D7_13_v3:1,095,553..1,098,464(-)	translation initiation factor eIF-2B subunit gamma, putative	1.33689e-05	0.00209006	0.000178637	0.018506	-1.69757	0.841158	1.04414	0.843974	-1.04333	0.139073	1.38264	0.0181547	1.70052	0.00498546	1.90092	0.228725	-1.32349	7.75345	8.85964	11.0998	1.81192	6.76555	5.52199	5.55011	1
953	MAL13P1.148	MAL13P1.148_v7.1_P2/7	myosin C	PF3D7_1329100	MAL13P1.148				Pf3D7_13_v3:1,227,372..1,234,418(-)	myosin F, putative	7.18392e-14	1.5297e-06	1.13577e-10	0.00186252	1.41562	0.00097198	-1.45056	0.0404341	-1.24542	0.922628	1.01013	0.388457	-1.09416	0.0797309	-1.2045	0.499875	-1.07799	35.7277	9.46822	33.7318	1.27704	25.7906	4.882	1.2872	1
3236	MAL13P1.15	MAL13P1.15_v7.1_P1/1	conserved Plasmodium protein, unknown function	PF3D7_1303000	MAL13P1.15				Pf3D7_13_v3:158,144..158,778(+)	conserved Plasmodium protein, unknown function	2.20537e-14	0.553066	1.28035e-10	0.00124946	1.98402	0.0513538	-1.48154	0.740688	1.06709	0.697505	1.07928	0.0103729	1.69577	0.00187735	1.92735	0.000792052	2.1524	38.7027	36.6165	0.358942	0.0485134	25.5566	17.2708	4.59533	1
3063	MAL13P1.150	MAL13P1.150_v7.1_P1/2	conserved Plasmodium protein, unknown function	PF3D7_1328400	MAL13P1.150				Pf3D7_13_v3:1,200,840..1,202,342(-)	conserved protein, unknown function	0.000235005	0.211345	0.000458402	0.875423	-1.05372	0.105917	1.73365	0.192364	-1.55364	0.807889	1.08457	0.0842014	1.80272	0.12217	1.69071	0.386604	1.36426	5.60354	15.3591	1.62278	0.635423	5.969	11.6863	13.3132	1
1419	MAL13P1.151	MAL13P1.151_v7.1_P6/7	conserved Plasmodium protein, unknown function	PF3D7_1328000	MAL13P1.151				Pf3D7_13_v3:1,174,191..1,180,832(-)	conserved Plasmodium protein, unknown function	3.64413e-12	0.0091641	1.39796e-09	0.134185	1.56659	0.485943	1.22887	0.0326436	-1.9187	0.0454976	-1.83571	0.320859	-1.34275	0.484927	1.22946	0.201002	1.50355	27.1947	58.1345	7.63705	2.33226	21.2154	32.3946	10.3832	1
508	MAL13P1.152	MAL13P1.152_v7.1_P1/3	conserved Plasmodium protein, unknown function	PF3D7_1327500	MAL13P1.152				Pf3D7_13_v3:1,155,022..1,157,905(+)	conserved Plasmodium protein, unknown function	2.71657e-10	0.524461	2.79513e-10	0.048379	2.16617	0.0315186	2.33198	0.0261285	2.40595	0.0160883	-2.60174	0.0356328	-2.28407	0.746569	-1.13087	0.298771	1.53085	19.8287	70.5689	0.413602	0.210283	24.0716	61.1921	17.2862	1
1302	MAL13P1.155	MAL13P1.155_v7.1_P4/4	conserved Plasmodium protein, unknown function	PF3D7_1327000	MAL13P1.155				Pf3D7_13_v3:1,134,070..1,138,040(-)	conserved Plasmodium protein, unknown function	5.64525e-09	3.04923e-07	2.02445e-08	0.701155	1.07955	0.180719	1.31034	0.175371	1.31486	0.312428	1.22483	0.00360733	1.85608	0.000190955	2.28727	0.00111048	2.12406	15.6499	15.2901	40.3032	5.62525	17.0263	11.8821	4.7455	1
737	MAL13P1.156	MAL13P1.156_v7.1_P1/2	conserved Plasmodium protein, unknown function	PF3D7_1329700	MAL13P1.156				Pf3D7_13_v3:1,261,345..1,262,943(-)	apicoplast calcium binding protein 1	1.52565e-11	0.0261802	5.21521e-13	0.00465111	3.21082	0.000133371	5.24927	0.000572774	4.31847	0.124438	1.83404	0.0254209	-2.45978	0.120095	-1.84757	0.386567	1.4348	24.5399	90.855	5.40535	2.85892	38.1915	100.999	17.9828	1
1476	MAL13P1.157	MAL13P1.157_v7.1_P4/4	conserved Plasmodium protein, unknown function	PF3D7_1329800	MAL13P1.157				Pf3D7_13_v3:1,265,137..1,268,763(+)	conserved Plasmodium protein, unknown function	0.00046861	0.528211	5.12166e-05	0.335963	1.30553	0.360776	1.28796	0.486811	-1.21173	0.809188	1.06874	0.0416834	1.78286	0.949923	-1.01743	0.982156	1.0066	5.13247	9.5658	0.406125	0.108133	7.88547	10.4977	9.05264	1
3259	MAL13P1.158	MAL13P1.158_v7.1_P1/2	conserved Plasmodium protein, unknown function	PF3D7_1329900	MAL13P1.158				Pf3D7_13_v3:1,269,311..1,271,434(+)	conserved Plasmodium protein, unknown function	6.3276e-13	0.705425	1.25235e-14	0.000547142	1.64655	0.301575	-1.14693	0.000332038	-1.68474	0.893563	1.01777	0.000215066	1.71829	0.204526	1.18419	0.110481	1.25729	30.7582	13.1209	0.145315	0.00885555	49.3886	15.0488	2.07197	1
3608	MAL13P1.159	MAL13P1.159_v7.1_P1/1	thioredoxin, putative	PF3D7_1330000	MAL13P1.159				Pf3D7_13_v3:1,272,213..1,273,859(+)	PITH domain-containing protein, putative	9.71058e-09	5.50113e-07	3.44527e-10	0.0524341	-1.28709	0.852011	-1.02389	0.00797723	1.42473	0.0108346	1.4029	4.54348e-06	1.98117	0.000129112	1.71977	0.00822806	1.45756	14.9773	5.89872	37.8249	2.12816	23.6852	6.66306	1.91296	1
3144	MAL13P1.160	MAL13P1.160_v7.1_P1/1	conserved Plasmodium protein, unknown function	PF3D7_1330100	MAL13P1.160				Pf3D7_13_v3:1,274,448..1,275,008(+)	conserved Plasmodium protein, unknown function	0.0689414	0.0159877	0.278447	0.00454455	-12.7494	0.0882747	-4.34957	0.419835	1.98189	0.10363	-4.05883	0.0486167	-5.54758	0.754182	1.30269	0.0315551	-7.4501	2.11206	37.0154	6.42969	16.0979	1.32152	16.5433	85.125	1
1114	MAL13P1.161	MAL13P1.161_v7.1_P1/1	conserved Plasmodium protein, unknown function	PF3D7_1330200	MAL13P1.161				Pf3D7_13_v3:1,275,104..1,275,899(+)	conserved Plasmodium protein, unknown function	5.25057e-07	0.0582766	0.000706671	0.464491	1.21229	0.287147	-1.32497	0.265328	-1.34274	0.726272	-1.09621	0.611466	-1.14273	0.664234	1.12069	0.322632	1.32208	10.6257	17.9709	3.8402	0.927832	5.61609	6.78452	8.21474	1
2830	MAL13P1.163-a	MAL13P1.163-A_v7.1_P1/1	ER lumen protein retaining receptor 1, putative	?	?	?	?	?	?	?	1.46144e-06	0.279668	3.51201e-10	0.0467254	1.31254	0.140022	1.22032	4.35032e-05	1.85464	0.39776	-1.11947	0.00476735	-1.48885	0.90382	-1.01617	0.0691489	1.30263	9.66034	4.18966	1.20689	0.0747749	23.65	7.32637	2.10653	1
502	MAL13P1.164	MAL13P1.164_v7.1_P1/2	elongation factor Tu, putative	PF3D7_1330600	MAL13P1.164				Pf3D7_13_v3:1,287,891..1,289,408(-)	elongation factor Tu, putative	8.48905e-16	0.00188389	5.62522e-14	0.273888	1.31648	0.848152	1.04886	8.17022e-06	-3.66069	0.061166	-1.61406	0.282972	1.3096	0.0978474	1.52325	0.0454892	1.73117	48.0622	73.3772	11.357	2.47698	44.5814	48.6164	7.41547	1
469	MAL13P1.165	MAL13P1.165_v7.1_P1/2	GPI transamidase subunit PIG-U, putative	PF3D7_1330700	MAL13P1.165				Pf3D7_13_v3:1,290,118..1,292,954(+)	GPI transamidase subunit PIG-U, putative	5.04616e-06	0.5979	0.000267464	0.191684	1.97795	0.360365	1.60758	0.944811	1.03635	0.369127	-1.59366	0.465589	1.45915	0.143119	2.15432	0.137564	2.29887	8.56386	56.0742	0.283468	0.265155	6.41952	30.024	31.8035	1
2309	MAL13P1.166	MAL13P1.166_v7.1_P2/4	DEAD box helicase, putative	PF3D7_1331100	MAL13P1.166				Pf3D7_13_v3:1,299,906..1,305,294(-)	DNA polymerase theta, putative	3.41028e-05	0.0164473	1.15445e-06	0.0374363	1.32356	0.681082	-1.05512	0.00437901	1.48463	0.0106951	1.41854	0.377931	1.12259	0.356086	-1.12873	0.013414	1.4347	7.01443	2.93513	6.36965	0.380761	11.8025	3.5276	2.03243	1
3440	MAL13P1.167	MAL13P1.167_v7.1_P1/1	signal peptidase 21 kDa subunit	PF3D7_1331300	MAL13P1.167				Pf3D7_13_v3:1,309,177..1,310,006(+)	signal peptidase 21 kDa subunit	1.27307e-11	0.0702965	1.43389e-10	3.90335e-05	4.91655	0.00136082	3.2423	0.00270974	-2.97598	0.0897678	-1.80175	0.291868	-1.43468	0.955902	-1.01896	0.168161	1.66114	24.8633	70.5778	3.49214	1.41613	25.337	51.3732	13.7877	1
2047	MAL13P1.168	MAL13P1.168_v7.1_P1/1	protein tyrosine phosphatase, putative	PF3D7_1331600	MAL13P1.168				Pf3D7_13_v3:1,316,496..1,317,806(-)	protein tyrosine phosphatase-like protein, putative	3.12371e-11	0.661638	1.06366e-09	0.00026292	4.88085	0.00140103	3.87332	0.145383	-1.78623	0.3625	-1.43234	0.875523	1.06337	0.248245	1.57982	0.183879	1.75859	23.2924	88.1563	0.194932	0.105396	21.6816	58.6141	18.3831	1
2783	MAL13P1.170	MAL13P1.170_v7.1_P1/3	nucleotidyltransferase, putative	PF3D7_1332400	MAL13P1.170				Pf3D7_13_v3:1,337,117..1,339,693(-)	nucleotidyltransferase, putative	3.02165e-05	3.0347e-05	0.00411526	0.403831	1.16471	0.456773	1.14543	0.0481122	1.44746	0.186668	1.27518	0.0130472	1.60412	0.120511	1.33277	0.051462	1.47588	7.1078	5.77572	23.1255	2.68451	4.25548	2.46997	3.94686	1
2342	MAL13P1.171	MAL13P1.171_v7.1_P1/1	transmembrane protein Tmp21 homologue, putative	PF3D7_1333300	MAL13P1.171				Pf3D7_13_v3:1,368,081..1,368,716(-)	transmembrane protein Tmp21 homologue, putative	7.2177e-06	0.00149004	1.77285e-06	1.33397e-06	-2.48871	0.000857866	-1.76725	0.228651	-1.2104	0.309623	1.17428	0.251992	-1.19903	0.253718	-1.19822	0.0843063	-1.34461	8.26106	5.00582	11.9445	1.03398	11.3162	4.89792	2.94321	1
608	MAL13P1.172	MAL13P1.172_v7.1_P1/1	conserved protein, unknown function	PF3D7_1333400	MAL13P1.172				Pf3D7_13_v3:1,370,083..1,370,799(+)	conserved protein, unknown function	3.37419e-11	0.234365	1.04896e-06	7.56038e-05	-1.93649	0.86433	1.0256	0.106183	1.27599	0.916341	1.01566	0.530641	-1.0975	0.78715	-1.04078	0.210217	-1.22201	23.1612	12.4753	1.46576	0.112786	11.9127	4.58324	2.6162	1
3482	MAL13P1.174	MAL13P1.174_v7.1_P1/1	MSP7-like protein	PF3D7_1334800	MAL13P1.174				Pf3D7_13_v3:1,413,102..1,413,947(-)	MSP7-like protein	0.00260765	3.57403e-06	0.0017281	0.114266	-2.19901	0.0782443	-2.41737	0.904325	-1.06064	0.00229144	-4.96812	0.000961611	-5.79671	0.163894	-1.9971	0.0521528	-2.84582	4.02737	23.7722	30.5214	25.7368	4.91102	20.7058	28.6701	1
1289	MAL13P1.176	MAL13P1.176_v7.1_P3/10NU	reticulocyte binding protein 2 homologue b	PF3D7_1335300	MAL13P1.176				Pf3D7_13_v3:1,428,874..1,438,852(-)	reticulocyte binding protein 2 homologue b	1.56995e-15	0.00643897	2.876e-16	0.323108	1.48511	0.0094976	2.95761	0.136155	1.82592	0.994814	-1.00259	5.91821e-09	-20.8501	0.00175638	-3.81694	0.4429	-1.38732	46.1557	179.358	8.43026	4.67991	63.5132	176.291	18.8745	1
2578	MAL13P1.18	MAL13P1.18_v7.1_P2/3	conserved Plasmodium protein, unknown function	PF3D7_1303700	MAL13P1.18				Pf3D7_13_v3:180,549..184,517(+)	conserved Plasmodium protein, unknown function	8.19263e-11	0.12548	1.83449e-10	0.0224607	1.98637	0.0971995	1.63149	0.0490855	1.79627	0.000950591	-2.82524	0.0129911	-2.12212	0.820704	1.06774	0.318097	1.36461	21.6942	44.6275	2.46754	0.725145	24.8642	36.5346	9.99169	1
479	MAL13P1.180	MAL13P1.180_v7.1_P1/1	conserved Plasmodium protein, unknown function	PF3D7_1336200	MAL13P1.180				Pf3D7_13_v3:1,474,274..1,475,661(+)	conserved Plasmodium protein, unknown function	4.30857e-08	9.51666e-08	0.000191232	0.123433	-1.87052	0.00628846	-3.17293	0.00649518	-3.15703	0.0257138	-2.52124	0.0280551	-2.48336	0.325578	-1.485	0.383261	-1.45403	13.2346	51.9443	45.4577	25.488	6.70662	18.8019	19.0637	1
2400	MAL13P1.183	MAL13P1.183_v7.1_P1/1	conserved Plasmodium protein, unknown function	PF3D7_1336600	MAL13P1.183				Pf3D7_13_v3:1,480,954..1,481,702(+)	conserved Plasmodium protein, unknown function	2.69411e-14	0.0127155	5.55971e-15	0.00243153	1.96962	0.0790375	1.45458	2.94014e-06	-3.17972	0.00158603	-2.03502	0.931824	-1.018	0.0690342	1.47487	0.00285344	2.03684	38.1838	40.8444	6.91999	1.05745	52.1693	39.8604	5.19559	1
2906	MAL13P1.184	MAL13P1.184_v7.1_P3/3	endopeptidase, putative	PF3D7_1337000	MAL13P1.184				Pf3D7_13_v3:1,491,265..1,494,308(-)	mitochondrial intermediate peptidase, putative	2.76532e-11	0.195627	1.04795e-11	0.856752	-1.05326	0.0203969	-2.00187	0.740657	-1.09989	0.130415	1.55614	0.000363105	3.09507	0.00444949	2.38523	0.00319425	2.63214	23.5009	47.7786	1.74261	0.506118	30.8015	44.7294	9.87485	1
485	MAL13P1.185	MAL13P1.185_v7.1_P1/1	protein kinase 6	PF3D7_1337100	MAL13P1.185				Pf3D7_13_v3:1,495,259..1,497,240(+)	protein kinase 6	1.03762e-19	0.000248064	5.47123e-19	0.482275	-1.13693	2.18519e-08	-3.70196	0.0332076	-1.49326	0.917827	-1.01895	0.00283164	1.78847	0.040222	1.47006	0.431529	1.16617	85.5588	69.7259	16.7502	1.95007	95.1188	55.3692	3.95832	1
2198	MAL13P1.186	MAL13P1.186_v7.1_P4/4	1-deoxy-D-xylulose 5-phosphate synthase	PF3D7_1337200	MAL13P1.186				Pf3D7_13_v3:1,497,877..1,501,494(+)	1-deoxy-D-xylulose 5-phosphate synthase	1.17461e-10	0.457356	4.08973e-10	0.257213	-1.21379	0.0615701	-1.38409	0.248036	-1.21849	0.407505	-1.15144	0.04202	1.42656	0.0116585	1.56559	0.187875	1.27323	21.1198	14.9117	0.565174	0.0570064	23.3718	11.787	3.42942	1
2454	MAL13P1.188	MAL13P1.188_v7.1_P2/2	conserved Plasmodium protein, unknown function	PF3D7_1337700	MAL13P1.188				Pf3D7_13_v3:1,525,562..1,527,814(+)	conserved Plasmodium protein, unknown function	8.60305e-09	0.00861983	2.23265e-09	0.261407	1.72466	0.227625	1.79745	0.145646	2.03542	0.010165	-3.66533	7.04584e-05	-8.66343	0.38607	-1.5205	0.980553	-1.01261	15.1256	86.0397	7.77314	6.31661	20.4338	83.0245	27.6291	1
1389	MAL13P1.189	MAL13P1.189_v7.1_P2/2	conserved Plasmodium membrane protein, unknown function	PF3D7_1338000	MAL13P1.189				Pf3D7_13_v3:1,536,463..1,540,353(+)	LMBR1 domain-containing protein, putative	1.37246e-08	0.194615	0.0314374	0.0724117	1.47617	0.974226	1.00686	0.262722	1.27025	0.559465	-1.1318	0.768617	-1.06427	0.654873	1.09936	0.936169	1.01828	14.5592	16.0432	1.75073	0.275597	2.81031	2.21197	5.35222	1
536	MAL13P1.19	MAL13P1.19_v7.1_P5/26	conserved Plasmodium protein, unknown function	PF3D7_1303800	MAL13P1.19				Pf3D7_13_v3:184,845..212,660(-)	conserved Plasmodium protein, unknown function	2.1578e-15	0.0203905	3.99883e-13	0.00814582	1.93253	0.290565	1.28616	0.00149587	-2.24747	0.107144	-1.47392	0.826915	1.05301	0.145129	1.41843	0.157276	1.43679	45.1963	62.0271	5.919	1.16046	38.9104	38.1431	6.66591	1
1396	MAL13P1.190	MAL13P1.190_v7.1_P2/2	proteasome regulatory subunit, putative	PF3D7_1338100	MAL13P1.190				Pf3D7_13_v3:1,542,080..1,543,981(+)	26S proteasome regulatory subunit RPN3, putative	2.40432e-09	0.210498	0.000140051	0.724124	1.06469	0.023193	-1.52006	0.179872	1.27274	0.823364	-1.04041	0.909393	1.0204	0.0486779	1.43353	0.217821	1.26669	16.752	12.9787	1.62895	0.18029	6.9778	3.86147	3.76308	1
122	MAL13P1.193	MAL13P1.193_v7.1_P3/3	conserved Plasmodium protein, unknown function	PF3D7_1338600	MAL13P1.193				Pf3D7_13_v3:1,556,659..1,559,734(-)	conserved Plasmodium protein, unknown function	0.000165424	0.00148739	1.12655e-05	0.686042	-1.16675	0.52643	1.27393	0.0279354	-2.38374	0.0644321	-2.06051	0.0571218	-2.10618	0.254279	-1.5506	0.206492	-1.68334	5.84963	20.9046	11.949	6.10027	9.35024	23.8676	17.3578	1
2554	MAL13P1.194	MAL13P1.194_v7.1_P1/2	conserved Plasmodium protein, unknown function	PF3D7_1338700	MAL13P1.194				Pf3D7_13_v3:1,561,255..1,563,123(-)	conserved Plasmodium protein, unknown function	1.7867e-12	4.73137e-06	1.71365e-09	0.137165	1.44041	0.83626	1.05119	0.004167	-2.0884	0.0177577	-1.81713	0.00807948	-1.96307	0.329291	-1.26776	0.541499	1.17123	28.6015	41.0481	29.4958	6.04738	20.8728	21.3972	6.97085	1
566	MAL13P1.196	MAL13P1.196_v7.1_P3/3	serine/threonine protein kinase, putative	PF3D7_1338900	MAL13P1.196				Pf3D7_13_v3:1,568,374..1,571,169(-)	serine/threonine protein kinase, putative	3.05811e-15	9.79018e-05	8.04375e-13	0.0208967	1.76256	0.133169	1.43329	0.000239731	-2.61255	0.00663854	-1.96701	0.231837	-1.32953	0.976252	1.00704	0.550675	1.16272	44.1647	60.3829	19.4685	3.80253	37.0423	36.1749	6.64078	1
2283	MAL13P1.200	MAL13P1.200_v7.1_P1/1	mitochondrial ribosomal protein L49 precursor, putative	PF3D7_1339500	MAL13P1.200				Pf3D7_13_v3:1,587,028..1,587,874(-)	mitochondrial ribosomal protein L49 precursor, putative	8.498e-15	0.000109259	5.73436e-13	0.0749039	-1.57844	7.40015e-07	-4.49566	0.0163691	-1.87283	0.996327	1.00115	0.0452286	1.67609	0.130448	1.46961	0.626466	1.13933	41.2602	63.5945	19.1393	4.21421	37.9373	41.7664	7.48634	1
1287	MAL13P1.202	MAL13P1.202_v7.1_P5/6	conserved Plasmodium protein, unknown function	PF3D7_1339700	MAL13P1.202				Pf3D7_13_v3:1,590,510..1,596,320(-)	conserved Plasmodium protein, unknown function	2.00778e-13	0.000245917	4.71942e-10	0.00494776	2.03405	0.632575	-1.1207	0.536827	-1.15879	0.00138566	-2.27641	0.00901277	-1.92385	0.659718	1.11062	0.284836	1.31573	33.3011	46.4046	16.7748	3.33936	23.1126	23.005	6.76836	1
2757	MAL13P1.204	MAL13P1.204_v7.1_P1/1	exoribonuclease PH, putative	PF3D7_1340100	MAL13P1.204				Pf3D7_13_v3:1,604,376..1,605,212(-)	exosome complex component RRP42, putative	1.39501e-06	9.08509e-08	1.77945e-05	0.408362	-1.12333	0.179931	1.2095	0.00412898	1.53307	0.0317125	1.36512	0.000126179	1.82382	0.00262126	1.5701	0.309449	1.16561	9.703	4.67735	45.6706	3.14509	8.89498	3.06275	2.3414	1
3448	MAL13P1.205	MAL13P1.205_v7.1_P1/1	Rab GTPase 11b	PF3D7_1340700	MAL13P1.205				Pf3D7_13_v3:1,621,292..1,622,718(-)	ras-related protein Rab-11B	9.23298e-08	0.161652	9.33535e-07	0.0406397	1.96891	0.0794001	1.77826	0.0175881	2.21311	0.213484	-1.49715	0.965438	-1.01399	0.230132	1.47545	0.20885	1.5464	12.3994	31.3797	2.04681	0.739994	12.0477	21.7783	12.2922	1
187	MAL13P1.206	MAL13P1.206_v7.1_P1/2	sodium-dependent phosphate transporter	PF3D7_1340900	MAL13P1.206				Pf3D7_13_v3:1,627,311..1,629,480(+)	sodium-dependent phosphate transporter	0.0156188	0.13118	0.000304267	0.933204	1.01941	0.78797	-1.06365	0.5339	1.15379	0.00610134	1.94588	0.237815	1.31459	0.425161	-1.20171	0.18757	-1.38717	2.95835	3.8285	2.39246	0.442309	6.31055	5.83335	6.28579	1
3161	MAL13P1.209	MAL13P1.209_v7.1_P1/1	60S ribosomal protein L18-2, putative	PF3D7_1341300	MAL13P1.209				Pf3D7_13_v3:1,636,556..1,637,833(+)	60S ribosomal protein L18-2, putative	0.00011799	1.99106e-11	0.000836188	1.12268e-07	-5.70924	2.41073e-08	-6.54774	4.72701e-06	-4.11708	0.0205632	-1.88318	0.00280158	-2.31547	0.0296008	-1.80706	2.57409e-08	-7.40808	6.09075	10.3274	95.89	23.2272	5.48097	6.63822	8.23574	1
1459	MAL13P1.21	MAL13P1.21_v7.1_P1/3	chromosome condensation protein, putative	PF3D7_1304000	MAL13P1.21				Pf3D7_13_v3:216,652..220,029(-)	condensin complex subunit 2, putative	2.73147e-09	0.29394	1.70329e-07	0.0809942	1.83717	0.114125	1.73053	0.943446	-1.02446	0.0722174	-1.87295	0.400295	-1.33385	0.530194	1.23923	0.377191	1.38197	16.5838	47.3763	1.13633	0.463752	14.1235	28.8198	13.8758	1
2833	MAL13P1.210	MAL13P1.210_v7.1_P2/3	dolichyl-phosphate-mannose-glygolipidalpha-mannosyltransferase, putative	PF3D7_1341600	MAL13P1.210				Pf3D7_13_v3:1,642,119..1,644,479(+)	GPI mannosyltransferase 3	1.04686e-13	0.447274	1.73542e-10	0.00166762	2.56269	0.423971	1.24985	0.00842882	-2.16146	0.738457	-1.09721	0.210789	1.42118	0.106857	1.57845	0.0169211	2.09597	34.8216	66.0487	0.591174	0.160189	24.9701	33.8304	9.21289	1
2101	MAL13P1.214	MAL13P1.214_v7.1_P1/1	phosphoethanolamine N-methyltransferase	PF3D7_1343000	MAL13P1.214				Pf3D7_13_v3:1,696,894..1,698,113(+)	phosphoethanolamine N-methyltransferase	0.000209072	2.24678e-15	0.000746767	0.000116329	-2.05242	0.000552748	-1.87692	1.35657e-05	-2.31375	1.76044e-06	-2.58958	5.79965e-07	-2.75344	1.01875e-06	-2.66896	2.98862e-05	-2.33964	5.685	3.8733	186.882	18.1894	5.57165	2.71148	3.30926	1
3839	MAL13P1.215	MAL13P1.215_v7.1_P1/1	conserved Plasmodium protein, unknown function	PF3D7_1343100	MAL13P1.215				Pf3D7_13_v3:1,699,683..1,700,630(-)	conserved Plasmodium protein, unknown function	3.009e-06	1.5744e-05	2.30491e-07	0.788111	1.1325	0.734441	1.17011	0.712995	-1.18575	0.00418072	-4.09787	0.000248936	-6.5489	0.028275	-2.86446	0.0549867	-2.65344	9.01208	47.4882	25.2929	19.0398	13.7394	51.7131	25.5942	1
772	MAL13P1.216	MAL13P1.216_v7.1_P2/5	DNA helicase, putative	PF3D7_1343400	MAL13P1.216				Pf3D7_13_v3:1,714,443..1,719,255(+)	DNA repair protein RAD5, putative	2.94599e-06	0.0137066	3.54694e-09	0.000185764	-1.56472	0.0502752	1.24201	0.339185	1.10906	1.89136e-05	-1.69973	0.0292439	-1.27516	0.357699	1.10469	0.02878	-1.29779	9.03071	2.57192	6.75829	0.274963	19.6816	4.00377	1.3833	1
3118	MAL13P1.217	MAL13P1.217_v7.1_P1/1	conserved Plasmodium protein, unknown function	PF3D7_1343500	MAL13P1.217				Pf3D7_13_v3:1,720,319..1,721,672(+)	conserved Plasmodium protein, unknown function	6.148e-09	0.174717	2.20501e-06	0.505003	1.29833	0.935368	-1.03216	0.216909	-1.62826	0.623821	-1.21141	0.824702	1.09034	0.415191	1.37661	0.43744	-1.38472	15.5427	58.2849	1.92149	1.02937	11.0734	29.6608	18.2143	1
347	MAL13P1.218	MAL13P1.218_v7.1_P2/2	UDP-N-acetylglucosamine pyrophosphorylase, putative	PF3D7_1343600	MAL13P1.218				Pf3D7_13_v3:1,721,904..1,723,685(-)	UDP-N-acetylglucosamine pyrophosphorylase, putative	1.76384e-16	0.0569058	1.75048e-15	0.719793	-1.05626	0.525081	-1.10205	0.0302568	-1.40799	0.409455	1.13471	2.45698e-06	2.35111	4.99278e-05	2.01829	0.00182769	1.72797	53.2587	30.4571	3.88492	0.317382	56.3625	23.0229	2.77766	1
236	MAL13P1.22	MAL13P1.22_v7.1_P3/3	DNA ligase I	PF3D7_1304100	MAL13P1.22				Pf3D7_13_v3:221,816..224,720(-)	DNA ligase I	2.89775e-08	0.0240054	6.19143e-09	0.000150068	3.0982	0.000356621	2.8615	0.252438	1.36152	0.939967	1.02031	0.551015	1.17308	0.64109	1.13279	0.474607	1.22738	13.684	24.014	5.58229	1.39947	18.803	23.5694	8.52377	1
1964	MAL13P1.220	MAL13P1.220_v7.1_P1/2	lipoate synthase, putative	PF3D7_1344600	MAL13P1.220				Pf3D7_13_v3:1,789,425..1,790,672(+)	lipoyl synthase	5.28494e-08	0.756548	3.28023e-06	0.112363	2.2448	0.0418188	2.85598	0.483584	1.42107	0.294368	-1.6962	0.879366	-1.07882	0.973749	1.01658	0.756755	1.18012	13.0072	79.9654	0.0976735	0.0857823	10.639	46.7189	29.8607	1
3224	MAL13P1.221	MAL13P1.221_v7.1_P1/2	aspartate carbamoyltransferase	PF3D7_1344800	MAL13P1.221				Pf3D7_13_v3:1,796,274..1,797,709(+)	aspartate carbamoyltransferase	2.74254e-13	0.145973	4.52932e-14	0.000413516	-1.77596	0.00319524	-1.59288	0.457749	-1.11651	0.107998	1.27405	6.98984e-05	1.94295	0.00747058	1.51804	0.738753	1.05416	32.5932	17.5248	2.21409	0.170068	45.2489	17.3782	2.6116	1
3449	MAL13P1.225	MAL13P1.225_v7.1_P1/1	thioredoxin 2	PF3D7_1345100	MAL13P1.225				Pf3D7_13_v3:1,809,736..1,810,521(-)	thioredoxin 2	5.82836e-06	0.0792006	3.37836e-07	0.636504	1.11692	0.834055	-1.05017	0.654408	1.1104	0.000976805	2.30907	0.0661001	1.55313	0.0101481	-1.87995	0.111237	-1.49979	8.44121	11.3347	3.27477	0.628189	13.2634	12.7214	6.52211	1
1368	MAL13P1.226	MAL13P1.226_v7.1_P1/5	conserved Plasmodium protein, unknown function	PF3D7_1345400	MAL13P1.226				Pf3D7_13_v3:1,816,344..1,821,300(-)	conserved Plasmodium protein, unknown function	2.07425e-15	0.000199919	1.11966e-11	0.00335735	1.7516	0.946654	-1.01205	0.0515464	-1.43132	0.00987161	-1.62544	0.138115	-1.30978	0.60412	1.09747	0.22899	1.26203	45.3144	35.7418	17.3669	1.95688	30.6526	17.2695	3.83107	1
2512	MAL13P1.227	MAL13P1.227_v7.1_P1/1	ubiquitin conjugating enzyme	PF3D7_1345500	MAL13P1.227				Pf3D7_13_v3:1,823,190..1,824,026(+)	ubiquitin-conjugating enzyme E2	3.58493e-10	0.00331555	1.70249e-05	0.752153	-1.09016	0.00448236	-2.28271	0.508701	-1.19853	0.581019	-1.1631	0.843554	-1.0554	0.316563	1.31734	0.545833	-1.19345	19.4154	35.6498	9.97919	2.61763	8.9385	11.7233	8.91851	1
2032	MAL13P1.228	MAL13P1.228_v7.1_P2/2	conserved Plasmodium protein, unknown function	PF3D7_1345600	MAL13P1.228				Pf3D7_13_v3:1,826,411..1,827,649(+)	inner membrane complex protein	1.91735e-11	0.977418	4.74502e-12	0.026594	2.3796	0.0067736	2.94005	0.00285694	3.32811	0.282575	-1.50432	0.00109048	-3.79977	0.604763	-1.21577	0.373319	1.43432	24.1364	84.3173	0.000813086	0.000405773	32.6285	81.4167	16.9678	1
152	MAL13P1.229	MAL13P1.229_v7.1_P1/1	conserved Plasmodium protein, unknown function	PF3D7_1345900	MAL13P1.229				Pf3D7_13_v3:1,835,511..1,836,799(-)	kinetochore protein SPC25, putative	1.58315e-08	0.0771132	8.23201e-06	0.557858	1.26893	0.305655	-1.51972	0.06337	-2.16484	0.991999	1.00407	0.588176	-1.24606	0.576465	1.25477	0.146351	1.89553	14.389	58.1962	3.32318	1.92008	9.66948	27.9344	19.6447	1
2285	MAL13P1.231	MAL13P1.231_v7.1_P1/2	Sec61 alpha subunit, PfSec61	PF3D7_1346100	MAL13P1.231				Pf3D7_13_v3:1,843,376..1,844,897(+)	protein transport protein SEC61 subunit alpha	5.80884e-05	0.983477	2.26116e-05	0.104873	-1.22622	0.290909	-1.14033	0.0145872	1.37033	0.702609	1.04826	0.966647	1.00517	0.872185	1.02004	0.789859	-1.03577	6.61058	2.4737	0.000435245	2.32672e-05	8.66099	2.31498	1.81756	1
2626	MAL13P1.232	MAL13P1.232_v7.1_P1/1	mog1 homolog, putative	PF3D7_1346200	MAL13P1.232				Pf3D7_13_v3:1,845,878..1,846,384(-)	nuclear import protein MOG1, putative	4.74517e-07	1.95373e-07	1.16866e-06	0.895107	-1.02831	0.477742	-1.16284	0.20337	1.31333	0.0116395	1.75144	0.000152272	2.44855	0.000690511	2.19146	0.0986126	1.4645	10.7242	11.8297	42.2315	6.65497	11.7884	9.28829	5.35783	1
3053	MAL13P1.233	MAL13P1.233_v7.1_P1/1	DNA/RNA-binding protein Alba, putative	PF3D7_1346300	MAL13P1.233				Pf3D7_13_v3:1,849,528..1,850,517(+)	DNA/RNA-binding protein Alba 2	0.968912	5.50065e-05	0.993765	0.0218224	-4.84912	0.0243773	-4.69922	0.0237927	-4.73181	0.0940668	-3.0997	0.103412	-3.00149	0.30373	-1.98547	0.0081422	-7.19603	0.249394	2.68696	21.2354	32.6842	0.087264	0.671557	52.3307	1
60	MAL13P1.234	MAL13P1.234_v7.1_P13/17	conserved Plasmodium protein, unknown function	PF3D7_1346400	MAL13P1.234				Pf3D7_13_v3:1,852,898..1,870,864(+)	conserved Plasmodium protein, unknown function	4.07606e-05	0.0303137	1.57924e-06	0.0550033	1.23757	0.0201478	1.29888	0.000174839	1.57137	0.919696	1.01095	0.103513	-1.19655	0.20668	1.14806	0.0326059	1.29107	6.87791	1.97635	5.10939	0.209739	11.4461	2.3493	1.39569	1
2328	MAL13P1.235	MAL13P1.235_v7.1_P1/1	conserved Plasmodium membrane protein, unknown function	PF3D7_1347300	MAL13P1.235				Pf3D7_13_v3:1,893,613..1,895,023(-)	conserved Plasmodium membrane protein, unknown function	2.71613e-08	0.172806	5.12913e-05	0.847571	-1.05261	0.0122552	-2.01444	0.684861	-1.11444	0.553813	-1.17151	0.35118	1.28432	0.0655799	1.65475	0.0342736	1.86665	13.7583	24.0785	1.93911	0.484806	7.88412	9.85571	8.50049	1
751	MAL13P1.236	MAL13P1.236_v7.1_P1/1	conserved Plasmodium protein, unknown function	PF3D7_1347400	MAL13P1.236				Pf3D7_13_v3:1,895,983..1,896,402(+)	conserved Plasmodium protein, unknown function	0.320957	0.0318755	0.849398	0.015179	-11.3067	0.108453	-4.77542	0.554409	1.76169	0.118126	-4.57472	0.184657	-3.61167	0.546034	1.78311	0.180936	-3.99432	1.21608	27.3198	5.0089	16.0753	0.394087	6.32382	109.118	1
1735	MAL13P1.237	MAL13P1.237_v7.1_P1/2	conserved Plasmodium protein, unknown function	PF3D7_1347500	MAL13P1.237				Pf3D7_13_v3:1,897,983..1,899,362(-)	DNA/RNA-binding protein Alba 4	3.31319e-07	0.00501428	7.94517e-05	6.48037e-05	-2.25996	0.0161556	-1.57356	0.0461953	-1.44858	0.503648	-1.12869	0.849107	-1.03493	0.0598211	-1.41724	0.000551672	-2.07511	11.0785	8.87502	9.00511	1.03057	7.48316	4.28197	3.89106	1
2893	MAL13P1.23-a	MAL13P1.23-A_v7.1_P2/2	CorA-like Mg2 transporter protein, putative	?	?	?	?	?	?	?	3.40851e-08	0.00070084	1.55799e-10	0.00255341	2.29442	0.00367102	2.21578	0.000841587	2.54433	0.000862689	2.53858	0.982604	-1.00562	0.168064	-1.43208	0.936465	1.02213	13.4989	21.9184	13.8979	3.22377	25.1769	29.2002	7.88665	1
1700	MAL13P1.241	MAL13P1.241_v7.1_P1/1	GTPase, putative	PF3D7_1348100	MAL13P1.241				Pf3D7_13_v3:1,925,049..1,926,780(+)	GTPase, putative	2.86687e-09	0.303663	1.13574e-07	0.0224614	3.0858	0.292058	1.65579	0.222612	1.79567	0.176194	-1.91719	0.233374	-1.77127	0.552432	-1.32678	0.560276	1.34487	16.5203	91.6097	1.0908	0.864112	14.6487	58.0221	26.9342	1
465	MAL13P1.242	MAL13P1.242_v7.1_P1/1	step II splicing factor, putative	PF3D7_1348200	MAL13P1.242				Pf3D7_13_v3:1,927,449..1,928,260(+)	step II splicing factor, putative	1.92841e-07	0.00823793	0.0141221	0.91002	-1.02264	0.057009	1.47315	0.193117	1.29833	0.835209	1.04208	0.856799	-1.0364	0.906471	1.02355	0.144274	-1.36911	11.6263	11.228	7.87427	1.08636	3.36607	2.32197	4.69075	1
776	MAL13P1.243	MAL13P1.243_v7.1_P2/4	elongation factor Tu, putative	PF3D7_1348300	MAL13P1.243				Pf3D7_13_v3:1,929,091..1,933,721(-)	elongation factor Tu, putative	0.000350287	0.00175379	0.0613894	0.298431	-1.43597	0.255694	1.4861	0.147643	1.66148	0.232747	1.51638	0.0631744	1.9313	0.467413	1.28639	0.887708	-1.0535	5.3291	15.6287	11.5353	4.83279	2.35443	4.93202	14.2446	1
1951	MAL13P1.244	MAL13P1.244_v7.1_P1/1	TBC domain protein, putative	PF3D7_1348500	MAL13P1.244				Pf3D7_13_v3:1,950,400..1,951,847(+)	TBC domain protein, putative	7.53869e-11	0.198822	1.20867e-09	2.09119e-05	5.7691	0.00284774	3.13427	0.102937	-1.81349	0.547355	-1.24096	0.200107	1.59058	0.133483	1.72637	0.00723108	2.95989	21.8286	68.7821	1.71733	0.773044	21.4626	48.3064	15.3049	1
3869	MAL13P1.248	MAL13P1.248_v7.1_P1/1	nucleoside diphosphate hydrolase, putative	PF3D7_1349100	MAL13P1.248				Pf3D7_13_v3:1,969,769..1,970,752(-)	nucleoside diphosphate hydrolase, putative	1.96547e-08	0.0995247	6.49191e-10	0.00118012	4.01993	0.00208531	3.70385	0.00363576	3.41259	0.351559	-1.44936	0.048752	-2.23256	0.512903	1.29669	0.277401	1.5899	14.1339	54.4984	2.86759	1.57957	22.5429	62.0875	18.7285	1
410	MAL13P1.249	MAL13P1.249_v7.1_P3/10	conserved Plasmodium protein, unknown function	PF3D7_1349500	MAL13P1.249				Pf3D7_13_v3:1,985,337..1,995,614(-)	conserved Plasmodium protein, unknown function	1.01482e-10	0.000249826	6.98418e-14	0.911002	1.00831	0.0405604	1.16944	0.0147774	1.20783	9.4763e-05	-1.38429	4.14268e-08	-1.67617	0.26127	-1.08761	0.0121956	1.23132	21.3515	2.88205	16.7301	0.322607	43.9232	4.23487	0.655624	1
3115	MAL13P1.250	MAL13P1.250_v7.1_P1/1	conserved Plasmodium protein, unknown function	PF3D7_1349600	MAL13P1.250				Pf3D7_13_v3:1,997,023..1,998,282(+)	conserved Plasmodium protein, unknown function	2.28618e-12	0.000506589	2.72925e-07	0.00305506	1.95806	0.796302	-1.05634	0.0566895	-1.51525	0.0792269	-1.464	0.318232	-1.23786	0.62661	-1.10896	0.410434	1.20645	28.1083	31.1529	14.7688	2.33837	13.5277	10.7093	5.38326	1
2721	MAL13P1.252	MAL13P1.252_v7.1_P1/1	conserved Plasmodium protein, unknown function	PF3D7_1350000	MAL13P1.252				Pf3D7_13_v3:2,003,332..2,005,134(-)	conserved Plasmodium protein, unknown function	0.0963675	0.0633427	0.395136	0.0194799	-8.65478	0.16533	-3.48246	0.592377	1.60905	0.147244	-3.68841	0.0336644	-7.01485	0.228841	2.93991	0.0754165	-5.61472	1.9222	37.1796	3.68455	10.1811	1.0681	14.7568	93.948	1
2988	MAL13P1.253	MAL13P1.253_v7.1_P1/1	small nuclear ribonucleoprotein, putative	PF3D7_1350200	MAL13P1.253				Pf3D7_13_v3:2,009,477..2,010,281(-)	small nuclear ribonucleoprotein E, putative	1.27211e-07	1.60703e-08	0.128269	0.155593	1.34618	0.0141855	1.69762	0.0152704	1.68701	0.307075	1.23647	0.0236229	1.62426	0.00114287	2.06923	0.24502	1.29546	12.059	12.6196	54.0546	8.08112	1.8558	1.38721	5.08297	1
1081	MAL13P1.256	MAL13P1.256_v7.1_P2/6	phosphatidylinositol transfer protein, putative	PF3D7_1351000	MAL13P1.256				Pf3D7_13_v3:2,033,838..2,039,882(+)	phosphatidylinositol transfer protein, putative	4.35868e-08	4.97995e-06	8.28524e-06	0.265958	1.17069	0.041712	1.34297	0.00831983	1.47762	0.010582	1.45786	0.0510994	1.32543	0.688239	1.05801	0.00422529	1.57901	13.2217	6.411	29.3105	2.03032	9.66286	3.3467	2.35516	1
681	MAL13P1.257	MAL13P1.257_v7.1_P1/1	conserved Plasmodium protein, unknown function	PF3D7_1351100	MAL13P1.257				Pf3D7_13_v3:2,040,405..2,041,555(-)	conserved protein, unknown function	4.35658e-10	0.0295993	2.03788e-08	6.03316e-05	-1.99285	0.43465	-1.1265	0.277288	1.18099	0.47791	-1.11418	0.206744	1.214	0.0017093	1.67051	0.7441	-1.05444	19.1288	10.845	5.15727	0.417699	17.0167	6.89112	2.75374	1
1066	MAL13P1.258	MAL13P1.258_v7.1_P5/5	conserved Plasmodium protein, unknown function	PF3D7_1351200	MAL13P1.258				Pf3D7_13_v3:2,043,106..2,047,758(+)	conserved Plasmodium protein, unknown function	1.86425e-10	0.000768217	1.09943e-09	3.16566e-06	-2.09301	0.00339166	-1.51911	0.445763	-1.10781	0.0145539	-1.40738	0.334116	-1.13887	0.0195164	1.38455	0.643204	-1.06856	20.4007	8.97536	13.655	0.858222	21.6248	6.79564	2.13692	1
73	MAL13P1.26	MAL13P1.26_v7.1_P7/10	conserved Plasmodium protein, unknown function	PF3D7_1305300	MAL13P1.26				Pf3D7_13_v3:256,430..267,182(-)	conserved Plasmodium protein, unknown function	1.96664e-09	4.91631e-05	8.41196e-07	0.0152553	-1.54048	0.90626	1.02026	0.277086	1.20537	0.531705	1.11277	0.00555625	1.64991	0.00447246	1.67347	0.560955	1.11199	17.0195	12.1554	21.587	2.20251	12.169	6.208	3.469	1
1446	MAL13P1.260	MAL13P1.260_v7.1_P2/4	alveolin, putative	PF3D7_1351700	MAL13P1.260				Pf3D7_13_v3:2,059,616..2,063,924(+)	inner membrane complex protein 1f, putative	2.97445e-14	0.00699926	7.42337e-16	0.598881	1.20091	0.0292251	2.19232	0.0550375	1.98393	0.370974	1.36699	3.75206e-08	-11.4072	0.000671781	-3.63495	0.179178	-1.65793	37.9294	112.624	8.24082	3.49566	59.6644	126.545	14.4224	1
2939	MAL13P1.261	MAL13P1.261_v7.1_P2/2	conserved Plasmodium protein, unknown function	PF3D7_1351900	MAL13P1.261				Pf3D7_13_v3:2,067,529..2,068,767(-)	conserved Plasmodium protein, unknown function	0.000400863	3.30143e-06	0.0280449	0.000224726	-2.03408	0.0399541	-1.44415	0.0151452	-1.55295	0.0139088	-1.56242	0.000564003	-1.92451	0.215591	-1.24247	0.000923949	-1.94938	5.23762	3.87239	30.8146	3.25464	2.88879	1.52557	3.59108	1
1537	MAL13P1.262	MAL13P1.262_v7.1_P6/6	conserved Plasmodium protein, unknown function	PF3D7_1352000	MAL13P1.262				Pf3D7_13_v3:2,069,317..2,075,337(+)	conserved Plasmodium protein, unknown function	1.06937e-12	0.000556195	9.7209e-10	0.0419615	1.3192	0.00343355	-1.51028	0.126251	-1.22808	0.0272668	-1.35308	0.239309	-1.16997	0.0107084	1.42471	0.10236	1.26519	29.6516	12.7219	14.5163	0.889738	21.8368	6.69214	2.08394	1
1205	MAL13P1.264	MAL13P1.264_v7.1_P2/2	conserved Plasmodium protein, unknown function	PF3D7_1352200	MAL13P1.264				Pf3D7_13_v3:2,080,764..2,083,152(+)	U3 small nucleolar RNA-associated protein 15, putative	1.0016e-10	9.22831e-09	1.03786e-08	0.264035	1.23362	0.0160609	1.59746	0.00132461	1.90951	0.000180939	2.17444	0.000917329	1.95696	0.816414	1.0442	0.916024	-1.02122	21.3723	18.2433	56.9269	6.94178	18.0132	10.9828	4.14603	1
3708	MAL13P1.265	MAL13P1.265_v7.1_P2/2	conserved Plasmodium protein, unknown function	PF3D7_1352300	MAL13P1.265				Pf3D7_13_v3:2,083,689..2,085,530(-)	conserved Plasmodium protein, unknown function	4.39788e-11	1.67132e-08	9.89362e-11	0.000848246	-1.55128	0.000228388	-1.6396	3.04844e-06	-1.95263	8.33721e-05	-1.70904	0.0439794	-1.28529	0.0883822	1.23426	0.0588723	1.28494	22.715	8.16615	53.8551	2.76587	26.0621	6.69246	1.74616	1
741	MAL13P1.266	MAL13P1.266_v7.1_P3/5	conserved Plasmodium protein, unknown function	PF3D7_1352400	MAL13P1.266				Pf3D7_13_v3:2,087,393..2,092,177(+)	conserved Plasmodium protein, unknown function	4.66219e-05	0.00108297	2.14427e-06	0.00640584	-1.48031	0.00318557	-1.53497	0.27145	-1.1629	0.262054	-1.16645	0.115411	-1.24373	0.390843	1.1245	0.431931	-1.12163	6.77592	3.08445	12.759	0.829712	11.1043	3.61054	2.21101	1
2194	MAL13P1.268	MAL13P1.268_v7.1_P2/2	conserved Plasmodium protein, unknown function	PF3D7_1352900	MAL13P1.268				Pf3D7_13_v3:2,114,157..2,116,211(-)	Plasmodium exported protein, unknown function	6.55226e-14	0.190442	3.01601e-13	0.883006	1.06594	0.0454072	2.44624	0.0213717	2.82659	0.0952582	2.09386	0.197426	-1.76149	6.03323e-05	-7.17817	0.00021584	-6.72886	35.9522	166.536	1.78474	1.18102	39.6864	131.309	22.499	1
2470	MAL13P1.269	MAL13P1.269_v7.1_P3/3	tryptophan-rich antigen	PF3D7_1353000	MAL13P1.269				Pf3D7_13_v3:2,118,361..2,120,913(-)	tryptophan-rich protein, pseudogene	0.0142955	1.18929e-06	0.000345352	0.149106	-1.29503	0.0397389	-1.45433	0.544382	-1.11321	0.198117	-1.25845	0.000238227	-2.05288	2.06305e-05	-2.37485	2.20066e-05	-2.51079	3.00964	2.30572	34.716	3.79948	6.20421	3.39508	3.72111	1
2608	MAL13P1.270	MAL13P1.270_v7.1_P1/1	proteasome subunit, putative	PF3D7_1353900	MAL13P1.270				Pf3D7_13_v3:2,154,162..2,155,217(+)	proteasome subunit alpha type-7, putative	3.30968e-06	9.71286e-05	1.2022e-05	0.00687269	-1.72622	0.0015731	-1.91911	0.0122471	-1.65193	0.8678	-1.03233	0.469893	-1.14871	0.544368	-1.12318	0.876002	1.0324	8.92854	8.0251	19.4924	2.50287	9.2848	5.96094	4.36567	1
2758	MAL13P1.271	MAL13P1.271_v7.1_P1/1	V-type ATPase, putative	PF3D7_1354400	MAL13P1.271				Pf3D7_13_v3:2,169,314..2,170,416(-)	V-type proton ATPase 21 kDa proteolipid subunit, putative	0.0036585	0.000121688	0.141525	0.000283903	1.84374	0.0425803	1.3752	0.0667111	1.3317	0.0988912	1.29249	0.238787	1.1988	0.679162	-1.06512	0.00020265	1.95996	3.81938	2.18132	18.8183	1.53536	1.789	0.729811	2.77401	1
2625	MAL13P1.275	MAL13P1.275_v7.1_P4/4	protein phosphatase, putative	PF3D7_1355700	MAL13P1.275				Pf3D7_13_v3:2,206,592..2,210,458(-)	NLI interacting factor-like phosphatase, putative	3.42114e-07	3.74113e-08	0.00517343	0.182553	1.17014	0.205044	1.1609	0.0262037	1.30789	0.00831197	1.3821	0.00121075	1.50349	0.082981	1.22907	0.0795682	1.24994	11.0466	3.67863	49.857	2.37183	4.08691	0.972129	1.61747	1
273	MAL13P1.278	MAL13P1.278_v7.1_P12/12	serine/threonine protein kinase, putative	PF3D7_1356800	MAL13P1.278				Pf3D7_13_v3:2,249,587..2,261,721(+)	serine/threonine protein kinase, putative	3.75161e-14	0.0566693	2.30127e-15	0.0815052	1.90125	0.00322479	3.10909	0.00465283	2.9574	0.233695	-1.54331	2.99541e-07	-9.72029	0.0450456	-2.1059	0.710191	-1.15416	37.3387	119.452	3.89276	1.77907	55.344	126.467	15.5387	1
1854	MAL13P1.279	MAL13P1.279_v7.1_P1/1	protein kinase 5	PF3D7_1356900	MAL13P1.279				Pf3D7_13_v3:2,263,199..2,264,755(-)	protein kinase 5	4.57453e-05	0.0179183	0.0315558	0.00755841	-2.39617	0.704971	-1.12465	0.701597	-1.12624	0.122509	-1.62786	0.605669	1.1739	0.701243	1.12641	0.0131759	-2.36415	6.79028	16.0539	6.18904	2.09035	2.80773	4.74156	11.4835	1
3424	MAL13P1.28	MAL13P1.28_v7.1_P1/2	conserved Plasmodium protein, unknown function	PF3D7_1305400	MAL13P1.28				Pf3D7_13_v3:268,785..270,737(-)	AAR2 protein, putative	3.98367e-08	0.0013857	0.000818203	0.0075002	-1.859	0.458286	1.17774	0.179872	1.34798	0.536414	1.14591	0.133119	1.39871	0.00175113	2.0975	0.00121623	-2.27712	13.3226	15.8231	12.1283	2.0578	5.49837	4.66452	5.76875	1
2410	MAL13P1.283	MAL13P1.283_v7.1_P1/2	TCP-1/cpn60 chaperonin family, putative	PF3D7_1357800	MAL13P1.283				Pf3D7_13_v3:2,291,897..2,294,134(+)	T-complex protein 1 subunit delta	7.24864e-05	0.00103941	3.86079e-05	0.626507	-1.15211	0.837275	-1.06149	0.969736	-1.01108	0.476538	1.23065	0.0102372	2.19	0.0373021	1.86803	0.0036727	2.61616	6.44604	13.383	12.865	3.81569	8.14958	12.0856	10.0842	1
3733	MAL13P1.284	MAL13P1.284_v7.1_P1/1	pyrroline carboxylate reductase	PF3D7_1357900	MAL13P1.284				Pf3D7_13_v3:2,295,637..2,297,156(+)	pyrroline-5-carboxylate reductase, putative	3.3265e-13	0.290929	1.57918e-13	0.0747741	-1.605	0.00960713	-2.02665	0.396006	-1.24764	0.156335	1.45222	0.00333416	2.25354	0.123948	1.50081	0.597246	1.15807	32.1615	53.2113	1.15084	0.27201	41.5155	49.0625	8.03616	1
349	MAL13P1.285	MAL13P1.285_v7.1_P6/6	patatin-like phospholipase, putative	PF3D7_1358000	MAL13P1.285				Pf3D7_13_v3:2,297,900..2,304,194(-)	patatin-like phospholipase, putative	1.99958e-11	0.158965	5.94472e-09	0.0982536	1.61833	0.678882	1.12552	0.766778	1.08835	0.00720629	-2.24706	0.396796	-1.27508	0.173366	1.48258	0.0313796	1.97311	24.0628	48.19	2.07409	0.59339	18.8661	26.9877	9.72729	1
216	MAL13P1.286	MAL13P1.286_v7.1_P1/5	conserved Plasmodium protein, unknown function	PF3D7_1358200	MAL13P1.286				Pf3D7_13_v3:2,309,035..2,314,125(+)	conserved Plasmodium protein, unknown function	1.31986e-11	0.115325	0.00015561	0.000117289	-1.53794	0.153294	1.15548	0.615298	1.05146	0.0458314	-1.22763	0.981448	-1.00232	0.190981	1.14112	0.00106698	-1.45991	24.7985	6.06305	2.61163	0.0912176	6.88557	1.20248	1.18754	1
1261	MAL13P1.287	MAL13P1.287_v7.1_P1/1	conserved Plasmodium protein, unknown function	PF3D7_1358400	MAL13P1.287				Pf3D7_13_v3:2,317,002..2,317,844(+)	conserved Plasmodium protein, unknown function	9.745e-12	0.333645	1.96379e-12	0.00095758	3.40136	0.000295635	3.91495	0.0285063	2.16925	0.0864551	-1.81786	0.0240269	-2.22481	0.908874	-1.03981	0.0999913	1.84401	25.3472	72.5464	0.961864	0.39328	34.7651	71.0725	13.9017	1
2480	MAL13P1.288	MAL13P1.288_v7.1_P1/1	conserved Plasmodium protein, unknown function	PF3D7_1358700	MAL13P1.288				Pf3D7_13_v3:2,326,394..2,326,855(-)	YOP1-like protein, putative	8.57102e-12	3.76844e-05	5.21856e-12	2.76125e-05	-1.5546	0.0921205	-1.17114	0.169841	1.13636	0.00491187	-1.31554	8.42093e-05	-1.50208	0.00450475	-1.31954	0.641022	-1.04691	25.5823	5.30837	22.4293	0.664874	32.4046	4.80286	1.00786	1
270	MAL13P1.289	MAL13P1.289_v7.1_P3/4	mitotic control protein dis3 homologue, putative	PF3D7_1359300	MAL13P1.289				Pf3D7_13_v3:2,353,681..2,356,902(+)	exosome complex exonuclease RRP44	1.16067e-11	1.14041e-07	2.38598e-08	0.197976	-1.16419	0.285258	1.13395	0.0560167	1.25745	0.352385	1.11536	0.000252883	1.60496	0.000329359	1.58797	0.756281	1.03949	25.0298	8.38097	44.6331	2.13499	16.7894	4.01554	1.62637	1
874	MAL13P1.29	MAL13P1.29_v7.1_P4/4	conserved Plasmodium protein, unknown function	PF3D7_1306000	MAL13P1.29				Pf3D7_13_v3:283,475..287,500(+)	conserved Plasmodium protein, unknown function	1.48037e-09	0.0109631	3.48214e-09	0.453203	1.36441	0.554103	1.27723	0.114043	1.94293	0.00022375	-5.42255	0.00392632	-3.5512	0.935775	-1.0338	0.544524	1.30731	17.403	72.8867	7.24233	4.33316	19.7112	58.9671	20.3425	1
3479	MAL13P1.292	MAL13P1.292_v7.1_P2/2	riboflavin kinase / FAD synthase family protein, putative	PF3D7_1359100	MAL13P1.292				Pf3D7_13_v3:2,347,863..2,349,986(-)	riboflavin kinase, putative	0.000702622	0.155367	0.188702	0.0371126	-1.41436	0.728535	1.05751	0.978582	-1.00433	0.472312	1.12314	0.426728	1.13716	0.546168	1.10231	0.0959711	-1.33973	4.86348	3.10122	2.11147	0.192342	1.59241	0.725291	3.09718	1
231	MAL13P1.293	MAL13P1.293_v7.1_P2/10	conserved Plasmodium protein, unknown function	PF3D7_1359000	MAL13P1.293				Pf3D7_13_v3:2,336,005..2,345,850(-)	conserved Plasmodium protein, unknown function	1.54785e-10	0.000876974	8.51052e-05	0.260704	-1.23183	0.991912	-1.00186	0.475437	1.1406	0.322782	1.2007	0.111225	1.34729	0.184611	1.28	0.111345	-1.37515	20.6879	17.1708	13.3071	1.57782	7.42104	4.39957	4.03138	1
3332	MAL13P1.294	MAL13P1.294_v7.1_P1/2	GTP binding protein, putative	PF3D7_1358900	MAL13P1.294				Pf3D7_13_v3:2,332,196..2,334,915(-)	GTP-binding protein, putative	6.22161e-12	0.445778	2.94488e-11	2.88019e-08	-3.30716	0.00423906	-1.66988	0.901057	-1.02117	0.848104	-1.03281	0.212829	1.23661	0.00782272	1.6045	0.000257148	-2.07427	26.1768	18.2922	0.595112	0.0594088	28.5428	14.2469	3.39415	1
113	MAL13P1.295	MAL13P1.295_v7.1_P2/6	conserved Plasmodium protein, unknown function	PF3D7_1359600	MAL13P1.295				Pf3D7_13_v3:2,371,882..2,377,959(+)	conserved Plasmodium protein, unknown function	2.01946e-16	5.33379e-09	3.08151e-14	0.172566	1.33015	0.000920723	-2.10298	4.1448e-06	-3.06818	0.102692	-1.40974	0.220572	-1.29115	0.48973	-1.15371	0.362956	-1.22367	52.792	55.2814	59.86	8.95467	46.4565	34.748	5.08618	1
3294	MAL13P1.297	MAL13P1.297_v7.1_P1/1	ADP-ribosylation factor, putative	PF3D7_1359800	MAL13P1.297				Pf3D7_13_v3:2,393,370..2,394,355(+)	ADP-ribosylation factor, putative	1.58111e-08	0.00132645	2.93895e-08	0.0989639	2.38629	0.682373	-1.23569	0.536184	1.37771	0.0793503	-2.52781	0.000179663	-8.63301	0.165391	-2.06858	0.789702	-1.15875	14.3905	94.4868	12.2394	11.4804	16.4921	77.3467	31.8915	1
2779	MAL13P1.298	MAL13P1.298_v7.1_P5/6	conserved Plasmodium membrane protein, unknown function	PF3D7_1359900	MAL13P1.298				Pf3D7_13_v3:2,395,974..2,402,354(+)	conserved Plasmodium membrane protein, unknown function	3.73596e-11	0.969623	2.95474e-12	0.300531	-1.13313	0.134487	1.19994	0.000586554	1.56943	0.946474	1.00807	2.72911e-05	-1.77881	0.0500092	-1.27327	0.530477	-1.08388	22.9889	8.1151	0.00147171	7.42163e-05	33.7619	8.51286	1.71458	1
1928	MAL13P1.299	MAL13P1.299_v7.1_P1/1	conserved protein, unknown function	PF3D7_1360200	MAL13P1.299				Pf3D7_13_v3:2,406,838..2,408,385(-)	ER membrane protein complex subunit 3, putative	2.40627e-06	2.67941e-10	0.00282462	0.076467	1.42397	0.00160277	1.94138	0.000559094	2.08897	5.54309e-05	2.43738	0.00545762	1.77561	0.00925805	1.70539	0.213979	1.29938	9.20992	8.60788	77.6535	10.3682	4.53654	3.02856	4.53963	1
3565	MAL13P1.30	MAL13P1.30_v7.1_P1/1	conserved Plasmodium protein, unknown function	PF3D7_1306100	MAL13P1.30				Pf3D7_13_v3:288,163..288,561(+)	conserved Plasmodium protein, unknown function	4.01794e-10	0.0678293	7.83093e-08	0.0859637	1.79488	0.688796	1.14294	0.0887927	-1.78515	0.319979	-1.39631	0.51509	-1.24307	0.895272	1.04484	0.570947	1.22426	19.2473	52.5958	3.55787	1.3889	15.1414	29.5541	13.2728	1
351	MAL13P1.302	MAL13P1.302_v7.1_P1/2	SUMO ligase, putative	PF3D7_1360700	MAL13P1.302, PF13_0321	PF13_0321			Pf3D7_13_v3:2,426,133..2,431,183(-)	E3 SUMO-protein ligase PIAS, putative	0.00796376	0.0548239	0.924723	0.0536091	-1.32575	0.398207	-1.12825	0.412101	-1.12425	0.476765	-1.1068	0.100486	-1.26886	0.565909	-1.0852	0.000309359	-1.83214	3.35231	1.66539	3.95518	0.280698	0.273012	0.0968779	2.41297	1
1561	MAL13P1.303-a	MAL13P1.303-A_v7.1_P2/2	polyadenylate-binding protein, putative	?	?	?	?	?	?	?	1.5996e-06	0.000471374	0.0128141	0.0627171	-2.32646	0.0572493	-2.37163	0.272151	-1.63195	0.37649	-1.48171	0.155817	-1.89055	0.975197	1.01384	0.518352	-1.35819	9.57781	46.0556	14.9647	10.2798	3.43459	11.7968	23.356	1
1129	MAL13P1.304	MAL13P1.304_v7.1_P1/6	conserved Plasmodium protein, unknown function	PF3D7_1361200	MAL13P1.304				Pf3D7_13_v3:2,455,261..2,461,424(+)	conserved Plasmodium protein, unknown function	5.39355e-05	4.20751e-05	0.116124	0.53022	1.06847	0.0595213	1.2258	0.0178009	1.29705	0.923197	1.01019	0.651273	1.04878	0.0643837	1.22096	0.00105176	1.49177	6.66613	1.81585	22.0785	0.859166	1.92324	0.374205	1.32308	1
2529	MAL13P1.306-a	MAL13P1.306-A_v7.1_P2/2	conserved Plasmodium protein, unknown function	?	?	?	?	?	?	?	3.85103e-12	0.0274537	8.46156e-13	0.233573	1.7071	0.063457	2.33045	0.0435315	2.52083	0.0885245	-2.16679	1.48336e-05	-9.26755	0.0825516	-2.20082	0.705108	-1.19711	27.0881	131.56	5.30902	3.68351	36.9099	128.044	23.5899	1
2974	MAL13P1.307	MAL13P1.307_v7.1_P1/1	conserved Plasmodium protein, unknown function	PF3D7_1361600	MAL13P1.307				Pf3D7_13_v3:2,469,127..2,469,540(-)	Fe-S assembly protein IscX, putative	3.2381e-06	0.87876	3.56968e-06	0.246799	1.58398	0.00544241	3.18616	0.451432	-1.34625	0.633485	-1.20658	0.788593	-1.11124	0.786432	1.11247	0.651251	-1.20959	8.94768	34.0422	0.0236219	0.0128388	10.5478	28.6643	18.4794	1
881	MAL13P1.308	MAL13P1.308_v7.1_P2/8	conserved Plasmodium protein, unknown function	PF3D7_1361800	MAL13P1.308				Pf3D7_13_v3:2,473,530..2,481,626(+)	glideosome-associated connector	1.57971e-13	0.0210668	4.03481e-15	0.17189	1.60235	0.00310054	2.93224	0.0109504	2.48265	0.00985608	-2.51864	9.496e-06	-5.79031	0.0275823	-2.1765	0.269266	-1.50023	33.8542	96.5049	5.8513	2.38282	53.3042	108.535	13.8458	1
183	MAL13P1.309	MAL13P1.309_v7.1_P1/1	14-3-3 protein, putative	PF3D7_1362100	MAL13P1.309				Pf3D7_13_v3:2,487,857..2,489,475(-)	14-3-3 protein	0.514354	0.0111132	0.648835	0.0963075	-3.0117	0.109911	-2.88092	0.770537	-1.20867	0.17998	-2.4168	0.227559	-2.20808	0.621531	-1.37872	0.0276969	-4.87984	0.904703	9.38884	7.21263	10.693	0.670027	4.96673	50.4065	1
2094	MAL13P1.310	MAL13P1.310_v7.1_P6/6	calpain	PF3D7_1362400	MAL13P1.310				Pf3D7_13_v3:2,495,924..2,502,070(+)	calpain	2.35186e-06	0.00675975	2.49526e-07	0.597757	-1.0683	0.0382826	1.30654	0.000714064	1.5866	0.0829574	1.24805	0.156888	-1.19669	0.89534	1.01658	0.597301	-1.07328	9.23031	3.5471	8.31973	0.456739	13.6398	3.744	1.86654	1
1313	MAL13P1.311	MAL13P1.311_v7.1_P2/3	exonuclease, putative	PF3D7_1362500	MAL13P1.311				Pf3D7_13_v3:2,503,185..2,505,458(+)	exonuclease, putative	4.15517e-10	0.699337	2.80107e-08	0.0997397	1.64931	0.624013	1.1575	0.260749	-1.40235	0.165927	-1.51985	0.413985	1.27702	0.0902463	1.67458	0.130286	1.63245	19.1981	41.9181	0.151709	0.0473213	16.5603	25.8276	10.6054	1
54	MAL13P1.318	MAL13P1.318_v7.1_P1/1	mitochondrial ribosomal protein L9 precursor, putative	PF3D7_1363300	MAL13P1.318				Pf3D7_13_v3:2,542,284..2,543,150(+)	50S ribosomal protein L9, mitochondrial, putative	0.294261	0.0656498	0.790031	0.0255049	-7.1426	0.338224	-2.26466	0.474726	1.83726	0.0761429	-4.66157	0.0642458	-5.00049	0.534271	1.69618	0.0833901	-4.97643	1.26985	22.4599	3.6182	9.14221	0.478061	6.03966	85.9088	1
290	MAL13P1.32	MAL13P1.32_v7.1_P5/13	MORN repeat protein, putative	PF3D7_1306500	MAL13P1.32				Pf3D7_13_v3:300,988..313,929(+)	MORN repeat protein, putative	0.0675622	0.37215	0.97536	0.155127	-2.75437	0.375805	-1.86893	0.537385	1.54372	0.390414	-1.83353	0.735589	-1.26778	0.544346	1.53227	0.189236	2.71288	2.1235	25.7548	0.817931	1.41718	0.160158	1.38748	58.9098	1
720	MAL13P1.321	MAL13P1.321_v7.1_P1/3	conserved Plasmodium protein, unknown function	PF3D7_1364000	MAL13P1.321				Pf3D7_13_v3:2,564,625..2,567,108(+)	conserved Plasmodium protein, unknown function	4.58222e-05	0.14142	1.97453e-08	0.0108931	1.44572	0.0225436	1.38683	0.000676127	1.66842	0.786728	-1.03802	0.00169458	-1.59437	0.994176	1.00101	0.00210456	1.62742	6.78901	3.17504	2.26666	0.151436	17.0625	5.69976	2.27155	1
1887	MAL13P1.322	MAL13P1.322_v7.1_P1/4	splicing factor, putative	PF3D7_1364300	MAL13P1.322				Pf3D7_13_v3:2,579,159..2,582,614(-)	pre-mRNA-splicing factor ATP-dependent RNA helicase PRP16	3.52047e-06	1.83477e-06	0.0116738	0.652054	1.06531	0.228693	1.18586	0.012951	1.44019	0.125434	1.24418	0.00314027	1.55606	0.176694	1.21151	0.600603	1.08174	8.87461	4.28659	33.03	2.27915	3.50054	1.20773	2.34609	1
2092	MAL13P1.323	MAL13P1.323_v7.1_P10/10	conserved Plasmodium protein, unknown function	PF3D7_1364400	MAL13P1.323				Pf3D7_13_v3:2,585,032..2,594,829(+)	conserved Plasmodium protein, unknown function	0.000117935	0.933354	0.352204	0.0517366	-1.43969	0.896471	1.02398	0.138906	-1.3151	0.975419	-1.00563	0.830052	-1.03987	0.318673	1.20072	0.00130421	-1.96835	6.09109	4.97028	0.00709753	0.000827361	1.15286	0.671944	3.96339	1
2071	MAL13P1.324	MAL13P1.324_v7.1_P3/3	aldo-keto reductase, putative	PF3D7_1364600	MAL13P1.324				Pf3D7_13_v3:2,598,757..2,601,399(+)	aldehyde reductase, putative	3.94065e-13	0.248576	5.14577e-10	0.0119526	1.84829	0.594544	1.13232	0.36166	-1.23844	0.0564402	-1.57895	0.873444	-1.03782	0.104464	1.47081	0.0242132	1.79184	31.7866	42.4665	1.37814	0.263026	22.957	21.9073	6.48908	1
2523	MAL13P1.328	MAL13P1.328_v7.1_P2/2	DNA topoisomerase VI, b subunit, putative	PF3D7_1365600	MAL13P1.328				Pf3D7_13_v3:2,621,261..2,624,000(+)	DNA topoisomerase VI, b subunit, putative	7.60311e-16	0.000483971	1.06905e-16	0.0021478	2.61607	0.000688837	2.94802	0.0653107	1.73577	0.0127019	-2.14203	1.02911e-08	-8.78878	0.00340705	-2.48837	0.610471	1.1725	48.4113	101.357	14.8929	4.45439	67.7655	101.342	10.1692	1
2339	MAL13P1.329	MAL13P1.329_v7.1_P1/2	conserved Plasmodium membrane protein, unknown function	PF3D7_1365700	MAL13P1.329				Pf3D7_13_v3:2,624,553..2,626,098(-)	SNARE associated Golgi protein, putative	7.46193e-06	0.000282804	6.17629e-07	0.00011655	1.81435	0.000633138	1.67391	0.0105736	1.44821	0.0488918	1.32257	0.49008	1.1002	0.746181	-1.04567	0.596774	1.08127	8.23321	3.85178	16.3796	1.09471	12.5333	4.18821	2.27234	1
2801	MAL13P1.331	MAL13P1.331_v7.1_P1/1	conserved Plasmodium protein, unknown function	PF3D7_1366100	MAL13P1.331				Pf3D7_13_v3:2,636,732..2,637,240(+)	DIP13 homolog, putative	2.18281e-09	0.562331	1.4995e-10	0.351863	1.36778	0.92367	1.03254	0.0104301	2.45866	0.260374	1.46194	0.0149865	-2.34029	0.0200393	-2.24719	0.536593	-1.24788	16.8803	46.4139	0.342365	0.13448	25.2506	49.592	13.3551	1
755	MAL13P1.332	MAL13P1.332_v7.1_P1/1	conserved Plasmodium protein, unknown function	PF3D7_1366200	MAL13P1.332				Pf3D7_13_v3:2,638,091..2,638,543(+)	conserved Plasmodium protein, unknown function	1.28836e-07	9.88791e-06	9.66534e-07	0.911853	1.02731	0.0537851	-1.62049	0.000379691	-2.59364	0.0927371	-1.51886	0.342904	-1.26164	0.31007	-1.28272	0.109858	-1.52819	12.0456	17.5649	26.8827	5.60004	12.0074	12.5066	7.08268	1
458	MAL13P1.333	MAL13P1.333_v7.1_P5/10	conserved Plasmodium protein, unknown function	PF3D7_1366300	MAL13P1.333, MAL13P1.334	MAL13P1.334			Pf3D7_13_v3:2,638,955..2,652,697(-)	conserved Plasmodium protein, unknown function	1.01556e-11	0.000106504	8.92242e-06	0.551591	-1.06482	0.974535	-1.00336	0.24633	1.13112	0.30787	1.11418	0.0420909	1.24683	0.213593	1.14154	0.640257	-1.05406	25.272	6.8852	19.2157	0.747886	9.58699	1.86566	1.3233	1
123	MAL13P1.334	MAL13P1.334_v7.1_P1/2	conserved Plasmodium protein, unknown function	?	?	?	?	?	?	?	4.95243e-06	0.00191901	8.25743e-05	0.000225117	-1.94883	0.00299393	-1.67705	0.000327701	-1.90814	0.718488	1.06054	0.991366	1.00176	0.231163	-1.21792	0.000781454	-1.89218	8.57989	5.60317	11.3111	1.05526	7.4483	3.47441	3.172	1
2602	MAL13P1.335	MAL13P1.335_v7.1_P2/2	phosphatidylserine synthase I, putative	PF3D7_1366800	MAL13P1.335				Pf3D7_13_v3:2,668,398..2,670,524(-)	phosphatidylserine synthase, putative	9.66692e-07	0.588314	2.35668e-07	0.0137942	1.44666	0.317012	-1.15534	0.0589979	1.32021	0.0689624	1.30609	0.229423	1.19007	0.084103	-1.2879	0.69375	1.06222	10.0434	5.0712	0.298625	0.0215407	13.7115	4.94524	2.45252	1
764	MAL13P1.336	MAL13P1.336_v7.1_P1/2	conserved Plasmodium protein, unknown function	PF3D7_1366900	MAL13P1.336				Pf3D7_13_v3:2,675,590..2,677,966(+)	conserved Plasmodium protein, unknown function	0.00921457	2.62207e-06	0.621415	0.00156151	-1.97803	0.028489	-1.57426	0.0124398	-1.68801	0.046486	-1.50658	0.00232612	-1.92118	0.00668532	-1.77353	0.0173543	-1.69956	3.26623	3.2094	31.6741	4.44614	0.708119	0.496998	4.77263	1
2759	MAL13P1.337	MAL13P1.337_v7.1_P1/1	Skp1 family protein, putative	PF3D7_1367000	MAL13P1.337				Pf3D7_13_v3:2,679,415..2,680,425(-)	suppressor of kinetochore protein 1, putative	8.29735e-06	0.101969	2.59092e-05	0.0763392	1.51412	0.928575	-1.02071	0.829897	-1.05036	0.749761	1.0757	0.0921603	1.48183	0.049275	1.58843	0.00682646	2.01141	8.14474	10.4766	2.82507	0.519131	8.52942	7.83676	6.24778	1
3239	MAL13P1.338	MAL13P1.338_v7.1_P1/2	U1 small nuclear ribonucleoprotein, putative	PF3D7_1367100	MAL13P1.338				Pf3D7_13_v3:2,681,321..2,682,592(+)	U1 small nuclear ribonucleoprotein 70 kDa homolog, putative	1.87525e-06	0.467884	0.0193484	0.00128003	-1.71225	0.272243	-1.1864	0.19535	-1.22423	0.563849	1.09337	0.181438	-1.23239	0.504033	1.10897	0.00455989	-1.64434	9.43356	5.52703	0.538991	0.0451128	3.14569	1.31645	2.84575	1
1835	MAL13P1.34	MAL13P1.34_v7.1_P1/2	RED-like protein, putative	PF3D7_1306800	MAL13P1.34				Pf3D7_13_v3:320,815..322,017(-)	RED-like protein, putative	1.40039e-07	0.0397284	0.00617312	0.000898706	-1.43866	0.678296	-1.0427	0.181557	-1.14604	0.115532	-1.17518	0.227254	-1.13077	0.134751	-1.16547	0.0948724	-1.2015	11.9581	2.98343	4.57401	0.163025	3.95792	0.705331	1.21181	1
934	MAL13P1.341	MAL13P1.341_v7.1_P1/1	ribosome biogenesis protein MRT4, putative	PF3D7_1367600	MAL13P1.341				Pf3D7_13_v3:2,693,921..2,694,859(-)	ribosome biogenesis protein MRT4, putative	7.44617e-06	0.00171607	0.000554392	0.00142052	-3.05773	0.00029987	-3.65353	0.0649859	-1.84715	0.350415	-1.35616	0.2279	-1.48456	0.615336	1.17725	1.87227e-05	-5.52893	8.23498	21.2951	11.5896	4.28143	5.813	10.7372	12.5603	1
2091	MAL13P1.342a	MAL13P1.342A_v7.1_P1/1	conserved Plasmodium protein, unknown function	PF3D7_1368000	MAL13P1.342a				Pf3D7_13_v3:2,708,813..2,709,566(-)	conserved Plasmodium protein, unknown function	3.021e-12	0.00525736	6.09466e-09	0.0195208	2.02723	0.482574	1.2271	0.331869	-1.32813	0.021997	-1.99761	0.056113	-1.76845	0.656765	1.13796	0.632789	1.16019	27.5592	57.1975	8.89548	2.63744	18.8274	27.9109	10.0807	1
3827	MAL13P1.343	MAL13P1.343_v7.1_P1/1	proteasome regulatory subunit, putative	PF3D7_1368100	MAL13P1.343				Pf3D7_13_v3:2,710,406..2,711,718(-)	26S proteasome regulatory subunit RPN11, putative	1.59563e-08	8.09263e-07	0.117143	5.75423e-08	2.63739	0.00139213	1.6295	0.000606793	1.69913	0.00873987	1.47744	0.0141759	1.43722	0.0144395	1.43568	0.000468265	1.78684	14.3797	7.06687	36.2504	2.54503	1.91732	0.673044	2.38703	1
3456	MAL13P1.344	MAL13P1.344_v7.1_P2/2	RNAse L inhibitor protein, putative	PF3D7_1368200	MAL13P1.344				Pf3D7_13_v3:2,713,463..2,715,436(-)	ABC transporter E family member 1, putative	1.49452e-08	0.00413027	1.26726e-07	0.00986401	-1.53974	0.873741	-1.0256	0.03384	1.4178	0.104364	1.3014	0.00465759	1.61325	0.125589	1.28136	0.150531	-1.28177	14.4575	8.99997	9.45821	0.841123	14.5055	6.44988	3.02363	1
1025	MAL13P1.346	MAL13P1.346_v7.1_P5/5	DNA repair endonuclease, putative	PF3D7_1368800	MAL13P1.346				Pf3D7_13_v3:2,731,041..2,736,143(-)	DNA repair endonuclease XPF, putative	7.56569e-09	0.00811708	2.33437e-07	0.473017	1.21679	0.34144	1.29809	0.0881006	-1.60771	0.0112892	-2.06363	0.307263	-1.3235	0.544891	1.17983	0.942781	1.02112	15.2841	27.9116	7.90733	2.06288	13.7234	17.901	8.87	1
2362	MAL13P1.347	MAL13P1.347_v7.1_P2/2	conserved Plasmodium protein, unknown function	PF3D7_1368900	MAL13P1.347				Pf3D7_13_v3:2,739,350..2,740,998(+)	conserved Plasmodium protein, unknown function	0.00010605	0.226457	0.000129111	0.204695	-1.25692	0.564482	-1.10838	0.61165	-1.09485	0.0170095	1.55862	0.327699	1.19197	0.0247048	1.51528	0.688531	-1.07942	6.16777	4.81714	1.51745	0.169308	7.04936	3.93263	3.79352	1
1588	MAL13P1.348	MAL13P1.348_v7.1_P2/3	glycosylphosphatidylinositol anchor attachment 1 protein, putative	PF3D7_1369000	MAL13P1.348				Pf3D7_13_v3:2,742,585..2,745,862(+)	glycosylphosphatidylinositol anchor attachment 1 protein, putative	1.00151e-09	0.000367728	1.07278e-10	0.999043	1.00028	0.000670392	2.37295	0.037053	1.65032	0.0215464	-1.74387	0.727184	1.08458	0.210819	1.34229	0.151703	1.436	17.9411	23.8734	15.6466	2.97431	25.9026	24.6196	6.46318	1
1953	MAL13P1.349	MAL13P1.349_v7.1_P5/7	conserved Plasmodium protein, unknown function	PF3D7_1369200	MAL13P1.349				Pf3D7_13_v3:2,749,595..2,756,107(+)	conserved Plasmodium protein, unknown function	1.19149e-11	1.62819e-11	2.69761e-07	0.892421	1.01451	0.00299335	1.40207	1.51637e-05	1.70381	0.0181305	1.30006	0.014904	1.31139	2.00154e-05	1.68714	0.184875	1.16522	24.9825	6.97003	97.4216	3.8829	13.5423	2.69875	1.35513	1
2732	MAL13P1.35	MAL13P1.35_v7.1_P1/2	U1 small nuclear ribonucleoprotein a, putative	PF3D7_1306900	MAL13P1.35				Pf3D7_13_v3:323,472..325,032(+)	U1 small nuclear ribonucleoprotein A, putative	1.28871e-07	4.18679e-06	0.000126965	0.172157	-1.19637	0.151659	1.20749	0.261039	1.15827	0.104785	1.23892	0.000132509	1.74004	0.0484648	1.30099	0.276628	-1.1641	12.0453	4.97171	29.9407	1.76544	7.06415	2.08267	2.00479	1
1460	MAL13P1.352	MAL13P1.352_v7.1_P2/4	conserved Plasmodium protein, unknown function	PF3D7_1369500	MAL13P1.352				Pf3D7_13_v3:2,769,916..2,773,480(+)	conserved Plasmodium protein, unknown function	9.53195e-11	2.22957e-11	1.53711e-06	0.416706	-1.13346	0.0803227	1.31608	0.00443431	1.59113	0.00915145	1.52372	0.00021349	1.88045	3.47053e-07	2.61343	0.352423	1.16599	21.4513	12.4385	95.0366	7.8724	11.4766	4.75335	2.8164	1
747	MAL13P1.356	MAL13P1.356_v7.1_P5/7NU	erythrocyte membrane protein 1, PfEMP1	PF3D7_1373500	MAL13P1.356				Pf3D7_13_v3:2,884,786..2,892,340(-)	erythrocyte membrane protein 1, PfEMP1	3.67143e-05	5.55934e-09	1.07728e-09	2.3256e-10	-5.48657	1.33422e-11	-6.75537	0.00289909	-1.85219	0.833664	1.04148	0.204164	-1.28226	0.847847	1.03783	0.00197449	-1.99033	6.95778	6.40888	59.6351	7.8472	21.6597	14.2507	4.47396	1
3667	MAL13P1.36	MAL13P1.36_v7.1_P1/1	PNAS-3 related protein, putative	PF3D7_1307000	MAL13P1.36				Pf3D7_13_v3:325,215..326,371(-)	exosome complex component RRP40, putative	2.02641e-09	0.953143	3.25132e-07	1.61661e-05	-2.04282	0.010309	-1.47177	0.0270964	-1.38911	0.475427	-1.10814	0.0601495	1.31873	0.147571	1.23474	0.118155	-1.27616	16.9795	8.58586	0.00350415	0.000253131	13.3107	4.80764	2.45607	1
824	MAL13P1.360	MAL13P1.360_v7.1_P1/2	conserved Plasmodium protein, unknown function	PF3D7_1326700	MAL13P1.360				Pf3D7_13_v3:1,125,280..1,126,908(+)	conserved Apicomplexan protein, unknown function	2.58027e-06	0.000272177	0.0012669	0.0120723	-1.40154	0.00335923	-1.49406	0.0570683	-1.28496	0.266028	-1.15483	0.0685794	-1.27052	0.0168244	-1.37721	0.0644031	-1.29709	9.14787	3.70242	16.4876	0.95329	5.15226	1.48948	1.96583	1
2216	MAL13P1.37	MAL13P1.37_v7.1_P2/3	conserved Plasmodium protein, unknown function	PF3D7_1307900	MAL13P1.37				Pf3D7_13_v3:351,840..354,818(-)	tripartite motif protein, putative	2.49587e-12	2.49593e-06	1.16457e-12	0.343556	1.43929	0.364304	1.41707	0.441961	1.34304	9.86007e-05	-5.32179	1.00627e-05	-7.12337	0.0220905	-2.48262	0.0623503	-2.18373	27.9344	100.274	31.8596	16.3377	36.0837	92.5192	17.4353	1
472	MAL13P1.380	MAL13P1.380_v7.1_P11/22	conserved Plasmodium protein, unknown function	PF3D7_1343800	MAL13P1.380				Pf3D7_13_v3:1,730,702..1,753,486(-)	conserved Plasmodium protein, unknown function	4.19886e-15	0.052613	5.90009e-16	0.00588164	2.1101	0.00403526	2.18952	0.00192913	2.34915	0.068672	-1.61241	1.05879e-06	-4.513	0.0769582	-1.58954	0.813319	1.06678	43.2451	69.7318	4.0331	0.929042	60.577	69.7709	7.83205	1
1171	MAL13P1.385	MAL13P1.385_v7.1_P2/2	RNA binding protein, putative	PF3D7_1343900	MAL13P1.385				Pf3D7_13_v3:1,756,212..1,758,158(+)	U4/U6 small nuclear ribonucleoprotein PRP4, putative	0.0130458	1.75306e-05	0.00917319	0.389715	-1.14066	0.0613914	1.33941	0.0018973	1.66305	0.00393485	1.59576	0.116479	1.27546	0.119556	1.27278	0.692031	-1.06664	3.06279	1.74544	24.9319	2.02977	3.6722	1.49481	2.76802	1
499	MAL13P1.39	MAL13P1.39_v7.1_P3/18	conserved Plasmodium protein, unknown function	PF3D7_1308400	MAL13P1.39				Pf3D7_13_v3:373,487..392,072(-)	conserved Plasmodium protein, unknown function	4.88582e-12	0.0197483	2.89074e-08	0.579666	1.04253	0.529239	1.04848	0.753111	1.0239	0.0248927	-1.19099	0.0215168	-1.19659	0.0274446	1.18721	0.0259454	1.20372	26.6328	3.68943	5.98559	0.118455	16.5155	1.63421	0.672859	1
2237	MAL13P1.395	MAL13P1.395_v7.1_P2/3	krox-like protein. putative	PF3D7_1344100	MAL13P1.395				Pf3D7_13_v3:1,764,190..1,766,607(+)	TLD domain-containing protein, putative	0.000169575	0.0797778	1.61089e-06	0.0322234	1.49879	0.469477	1.14174	0.260718	1.23029	0.0468	1.45332	0.0132364	1.60588	0.00950998	-1.64552	0.551649	1.12353	5.83211	4.78276	3.26164	0.382113	11.4237	6.69165	3.98321	1
2775	MAL13P1.40	MAL13P1.40_v7.1_P1/2	conserved Plasmodium protein, unknown function	PF3D7_1308500	MAL13P1.40				Pf3D7_13_v3:393,857..394,936(-)	conserved Plasmodium protein, unknown function	1.20433e-08	0.0204927	7.33745e-10	0.0239779	1.68493	0.122325	1.41882	0.00520531	-1.93345	0.0654645	-1.52233	0.75994	-1.07037	0.715535	-1.08451	0.713838	-1.0912	14.7161	17.9147	5.90861	1.02755	22.327	19.4142	5.91285	1
227	MAL13P1.405	MAL13P1.405_v7.1_P2/5	conserved protein, unknown function	PF3D7_1344300	MAL13P1.405				Pf3D7_13_v3:1,774,275..1,779,042(-)	zinc finger protein, putative	1.1105e-13	0.431364	1.00859e-14	0.00931739	2.02521	0.00119445	2.47255	0.0119789	1.97311	0.782177	1.07394	3.2934e-05	-3.40039	0.0335768	-1.76284	0.927749	-1.02531	34.6814	56.7554	0.634146	0.148253	50.1169	58.5824	7.94862	1
3642	MAL13P1.413	MAL13P1.413_v7.1_P1/1	membrane associated histidine-rich protein	PF3D7_1370300	MAL13P1.413				Pf3D7_13_v3:2,787,972..2,788,913(+)	membrane associated histidine-rich protein	2.17109e-06	0.0130036	4.62267e-05	0.00325489	-7.93011	0.0420672	-3.98146	0.606069	-1.40557	0.656483	-1.34108	0.145607	-2.64881	0.764003	-1.21889	3.65935e-05	-27.6133	9.30179	99.3814	6.87162	10.4882	7.98079	60.9055	51.8943	1
3532	MAL13P1.415	MAL13P1.415_v7.1_P1/2	hypothetical protein, pseudogene	?	?	?	?	?	?	?	0.668557	0.0708859	0.315013	0.0668292	-1.79269	0.281725	-1.40101	0.832209	-1.06803	0.788892	-1.08675	0.388846	-1.30877	0.35507	-1.33514	0.0386889	-2.03158	0.703994	1.67101	3.47682	1.17895	1.2336	2.09149	11.529	1
1323	MAL13P1.42	MAL13P1.42_v7.1_P1/2	recombinase, putative	PF3D7_1308800	MAL13P1.42				Pf3D7_13_v3:403,788..406,703(-)	tyrosine recombinase	0.00514804	0.0591987	0.0359584	0.918427	-1.07703	0.991001	1.0082	0.107009	-3.28919	0.378661	-1.89933	0.517088	-1.6013	0.83404	1.16398	0.7976	1.21984	3.61252	46.6662	3.81078	7.03246	2.71827	25.0817	62.7441	1
679	MAL13P1.43	MAL13P1.43_v7.1_P2/2	conserved Plasmodium protein, unknown function	PF3D7_1309000	MAL13P1.43				Pf3D7_13_v3:415,916..416,998(-)	conserved Plasmodium protein, unknown function	5.36136e-08	0.000349698	2.4925e-05	0.117027	-1.53656	0.822329	-1.0623	0.718467	1.10196	0.109081	1.55192	0.000974989	2.62254	0.0157494	1.97176	0.00712357	-2.26524	12.9913	23.1468	15.786	4.01801	8.56675	10.9025	8.65404	1
2996	MAL13P1.44	MAL13P1.44_v7.1_P3/3	protein phosphatase 2c-like protein, putative	PF3D7_1309200	MAL13P1.44				Pf3D7_13_v3:424,232..427,036(+)	protein phosphatase PPM6, putative	0.00233153	0.00419639	0.0188576	0.913836	1.01775	0.030231	-1.4406	0.53828	1.10556	0.834651	1.03454	0.0945294	-1.32	0.177601	-1.24885	0.930702	1.01523	4.09679	2.66601	9.42087	0.875811	3.16359	1.47051	3.16081	1
861	MAL13P1.45	MAL13P1.45_v7.1_P1/3	U4/U6 small nuclear ribonucleoprotein, putative	PF3D7_1309300	MAL13P1.45				Pf3D7_13_v3:427,457..429,643(-)	U4/U6 small nuclear ribonucleoprotein PRP3, putative	8.84404e-09	0.1397	0.000504687	0.000849812	-1.77449	0.906822	1.01865	0.747945	-1.05209	0.146923	-1.26194	0.184014	-1.23682	0.114643	-1.28889	0.00148637	-1.78467	15.0917	9.25948	2.28703	0.200458	5.88988	2.58123	2.98009	1
3432	MAL13P1.465	MAL13P1.465_v7.1_P1/1	Plasmodium exported protein, unknown function	PF3D7_1371900	MAL13P1.465				Pf3D7_13_v3:2,829,856..2,830,669(+)	Plasmodium exported protein, unknown function	1.39372e-14	0.029621	3.97134e-13	0.00955977	-2.55584	0.00295411	-2.9867	0.361107	-1.37202	0.278271	1.45711	0.0163265	2.37107	0.233481	1.51352	0.974062	1.01204	39.9155	116.375	5.1558	2.14741	38.9292	81.0708	14.1611	1
2786	MAL13P1.47	MAL13P1.47_v7.1_P1/1	mitochondrial ATP synthase delta subunit, putative	PF3D7_1310000	MAL13P1.47				Pf3D7_13_v3:448,907..449,668(+)	ATP synthase subunit O, mitochondrial, putative	3.21626e-17	6.20633e-05	5.0951e-14	1.50039e-07	3.73457	0.178088	1.31658	2.56327e-06	-3.08689	0.0481328	-1.50687	0.60144	-1.11122	0.773535	1.05973	0.157082	1.36257	59.4556	59.4054	20.8602	2.97752	44.8852	32.0338	4.85305	1
3363	MAL13P1.470	MAL13P1.470_v7.1_P2/2	Plasmodium exported protein (PHISTa), unknown function	PF3D7_1372000	MAL13P1.470				Pf3D7_13_v3:2,832,952..2,834,322(+)	Plasmodium exported protein (PHISTa), unknown function	7.08096e-10	0.00648789	2.75704e-06	0.232923	1.80846	0.910821	-1.05659	0.296471	1.67743	0.12059	2.17437	0.407038	1.50614	0.431915	1.47404	0.0499371	-2.88681	18.4287	109.538	8.41303	7.1437	10.8278	45.9709	28.8702	1
2181	MAL13P1.480	MAL13P1.480_v7.1_P1/1	histidine-rich protein III	PF3D7_1372200	MAL13P1.480				Pf3D7_13_v3:2,840,727..2,841,703(-)	histidine-rich protein III	7.34235e-10	0.29451	1.70442e-09	0.000841758	-8.50027	0.0773066	-2.89925	0.658937	1.29717	0.428839	1.59662	0.100999	2.67786	0.0219441	-4.06819	4.5939e-05	-18.4784	18.3773	156.713	1.13361	1.38099	20.8819	127.194	41.4196	1
1490	MAL13P1.485	MAL13P1.485_v7.1_P3/3	acyl-CoA synthetase, PfACS4	PF3D7_1372400	MAL13P1.485				Pf3D7_13_v3:2,850,891..2,853,482(+)	acyl-CoA synthetase	9.57352e-10	8.60576e-06	6.42654e-07	0.733236	-1.15397	0.0991241	-2.02705	0.00157663	-4.18576	0.0103177	-3.10114	0.24387	-1.63923	0.907466	1.05001	0.206171	-1.77567	18.0039	78.0966	27.3661	16.9582	12.4861	38.6868	21.0691	1
1409	MAL13P1.49	MAL13P1.49_v7.1_P1/1	conserved Plasmodium protein, unknown function	PF3D7_1310200	MAL13P1.49				Pf3D7_13_v3:454,061..454,636(+)	conserved Plasmodium protein, unknown function	5.60747e-06	0.00171297	4.32383e-08	0.715586	-1.23335	0.321207	1.77647	0.369649	1.68033	0.0551781	-3.10647	2.54493e-05	-16.1001	0.120705	-2.48082	0.0574055	-3.32092	8.474	68.9643	11.5941	13.4796	15.9508	92.7236	39.5291	1
1341	MAL13P1.490	MAL13P1.490_v7.1_P1/1	stevor	PF3D7_1372500	MAL13P1.490				Pf3D7_13_v3:2,854,544..2,855,568(-)	stevor, pseudogene	1.26901e-08	4.34713e-09	2.06199e-09	0.147871	2.42997	0.952081	1.03697	0.00878385	5.29723	9.86978e-05	14.0689	5.03768e-06	25.6328	2.42544e-05	18.7013	0.000486082	11.8546	14.6531	131.578	60.979	78.2231	20.565	131.903	43.6147	1
3089	MAL13P1.495	MAL13P1.495_v7.1_P1/1	rifin	PF3D7_1372600	MAL13P1.495				Pf3D7_13_v3:2,856,586..2,858,026(+)	rifin	1.92688e-09	3.33983e-12	2.48325e-09	0.143165	2.061	0.26458	1.72868	0.000108992	8.25973	1.65066e-06	16.2845	1.76413e-08	34.1943	1.08596e-06	17.4221	0.000473698	7.34934	17.0469	99.1337	110.137	91.4982	20.2591	84.1529	28.246	1
939	MAL13P1.50	MAL13P1.50_v7.1_P1/1	conserved Plasmodium protein, unknown function	PF3D7_1310500	MAL13P1.50				Pf3D7_13_v3:463,385..464,002(-)	conserved protein, unknown function	0.00497061	0.175177	0.000804653	0.704425	-1.11088	0.477666	-1.21816	0.770955	1.084	0.588258	1.16209	0.204305	1.42721	0.173111	1.46588	0.0724605	1.72409	3.63363	6.85599	1.91728	0.516792	5.51174	7.4283	9.16453	1
1457	MAL13P1.51	MAL13P1.51_v7.1_P1/1	secretory complex protein 61 alpha,Rab GTPase 5b	PF3D7_1310600	MAL13P1.51				Pf3D7_13_v3:465,091..466,552(-)	ras-related protein Rab-5B	9.24382e-13	0.0265601	3.38829e-11	0.000186162	2.18606	0.287949	1.22313	0.652437	-1.08847	0.512715	1.13137	0.0117533	-1.64346	0.0428903	-1.48063	0.271389	1.24982	29.9554	26.0433	5.37609	0.667711	28.2466	17.5412	4.2228	1
342	MAL13P1.52	MAL13P1.52_v7.1_P3/4	conserved Plasmodium protein, unknown function	PF3D7_1310800	MAL13P1.52				Pf3D7_13_v3:470,595..475,002(-)	conserved Plasmodium protein, unknown function	2.61615e-12	0.367699	5.325e-09	0.000128242	-2.0668	0.017933	-1.51896	0.363038	-1.16759	0.127195	1.30051	0.0474015	1.41301	0.217611	1.23504	8.59271e-06	-2.55979	27.8415	19.6391	0.833472	0.0839888	19.0379	9.59224	3.42617	1
3055	MAL13P1.53	MAL13P1.53_v7.1_P1/1	conserved Plasmodium protein, unknown function	PF3D7_1311000	MAL13P1.53				Pf3D7_13_v3:477,424..477,852(-)	protein ISD11	6.23768e-09	0.032051	3.85504e-06	0.000671719	-2.62613	0.384701	-1.25502	0.902866	1.03222	0.12348	1.50294	0.155746	1.45421	0.079678	1.59362	0.0110542	-2.0984	15.5245	25.799	4.99794	1.18653	10.4652	12.4224	8.07171	1
1650	MAL13P1.54	MAL13P1.54_v7.1_P1/2	conserved Plasmodium protein, unknown function	PF3D7_1311200	MAL13P1.54				Pf3D7_13_v3:481,499..483,082(-)	alternative splicing regulator, putative	8.38804e-12	0.483474	3.02116e-12	5.42307e-05	-1.76802	0.00866666	-1.41079	0.557775	-1.07587	0.23439	1.16131	0.00184984	1.51762	0.262694	1.15108	0.982414	1.00294	25.622	9.76596	0.501951	0.0273316	33.708	9.17714	1.85133	1
300	MAL13P1.540	MAL13P1.540_v7.1_P3/3	heat shock protein 70, putative	PF3D7_1344200	MAL13P1.540				Pf3D7_13_v3:1,769,129..1,771,927(+)	heat shock protein 110, putative	2.01433e-06	0.24928	4.78847e-10	0.0145613	-1.33243	0.0277633	-1.29215	0.0333092	1.28056	0.0611133	-1.24099	0.00639887	-1.38256	0.337422	1.11457	0.198386	1.16921	9.36907	2.90792	1.37396	0.0609206	23.0864	5.11816	1.50753	1
1370	MAL13P1.55	MAL13P1.55_v7.1_P1/1	cytochrome c2 precursor, putative	PF3D7_1311700	MAL13P1.55				Pf3D7_13_v3:497,534..498,013(-)	cytochrome c, putative	3.51686e-07	0.000164983	1.26362e-06	0.866337	-1.04846	0.800001	-1.07385	0.375317	1.28492	0.0663176	1.69798	0.0103965	2.13188	0.00232444	2.50608	0.673098	-1.13537	11.0192	21.4327	17.923	4.98014	11.699	16.2536	9.44731	1
3845	MAL13P1.550	MAL13P1.550_v7.1_P1/1	conserved Plasmodium protein, unknown function	PF3D7_1326200	MAL13P1.550				Pf3D7_13_v3:1,090,329..1,091,327(-)	conserved Plasmodium protein, unknown function	5.53434e-07	0.000358198	8.49928e-08	0.925525	1.01569	0.782179	1.04714	0.752907	1.05386	0.509749	1.11642	0.0204534	1.4947	0.000265932	1.95914	2.42859e-05	2.37026	10.5747	7.21622	15.7193	1.53242	15.0319	7.32704	3.31454	1
1328	MAL13P1.56	MAL13P1.56_v7.1_P1/4	M1-family alanyl aminopeptidase	PF3D7_1311800	MAL13P1.56				Pf3D7_13_v3:501,790..505,047(+)	M1-family alanyl aminopeptidase	1.76837e-08	0.113132	5.39436e-08	0.0369379	-1.41924	0.00405721	-1.6436	0.0313114	-1.43631	0.688634	-1.06732	0.0779139	1.34051	0.220647	-1.22281	0.143566	-1.29438	14.2581	9.25506	2.64467	0.245239	15.6461	7.25428	3.15281	1
3881	MAL13P1.58	MAL13P1.58_v7.1_P1/1	Plasmodium exported protein (PHISTa-like), unknown function	PF3D7_1301300	MAL13P1.58				Pf3D7_13_v3:78,614..79,470(-)	Plasmodium exported protein (PHISTa-like), unknown function, pseudogene	1.74184e-10	1.00433e-05	3.39503e-05	0.305106	-1.35197	0.614609	1.15856	0.00501751	2.38457	0.275612	1.37838	0.137186	1.55407	0.0600598	1.75656	0.308735	1.37704	20.5052	42.9572	26.8287	8.02921	8.27109	12.3768	10.1754	1
1904	MAL13P1.580	MAL13P1.580_v7.1_P1/1	conserved Plasmodium protein, unknown function	PF3D7_1365200	MAL13P1.580				Pf3D7_13_v3:2,611,483..2,611,638(+)	conserved Plasmodium protein, unknown function	2.92138e-10	0.00536797	3.57564e-10	0.0460002	-1.71656	0.276997	-1.33405	0.74095	-1.09084	0.0416651	1.73716	0.0175947	1.91748	0.0113343	2.01079	0.549297	1.18375	19.7198	33.5201	8.84738	2.14843	23.6171	28.6749	8.25628	1
2685	MAL13P1.59	MAL13P1.59_v7.1_P1/1	Plasmodium exported protein (PHISTa), unknown function	PF3D7_1301500	MAL13P1.59				Pf3D7_13_v3:85,563..86,624(-)	Plasmodium exported protein (PHISTa), unknown function	7.63038e-06	0.723218	8.18601e-09	0.250615	1.31742	0.0218972	-1.76232	0.122383	-1.45307	0.189822	1.37102	0.0356704	1.67527	0.405702	1.21967	0.503439	1.18592	8.21456	11.4139	0.127526	0.0253136	18.3731	18.235	6.74889	1
2144	MAL13P1.60	MAL13P1.60_v7.1_P2/4	erythrocyte binding antigen-140	PF3D7_1301600	MAL13P1.60				Pf3D7_13_v3:89,319..93,352(-)	erythrocyte binding antigen-140	1.2645e-15	0.0486402	9.74502e-17	0.316234	1.44851	0.000990894	3.71664	0.114859	1.80301	0.351716	1.41051	2.40652e-07	-10.3978	0.000182594	-4.61551	0.166622	-1.73397	46.8188	155.163	4.1827	1.98028	68.1761	161.389	16.0972	1
3052	MAL13P1.61	MAL13P1.61_v7.1_P1/1	Plasmodium exported protein (hyp8), unknown function	PF3D7_1301700	MAL13P1.61				Pf3D7_13_v3:99,548..100,521(+)	CX3CL1-binding protein 2	2.07902e-14	0.00409387	2.35963e-11	0.438262	-1.33044	0.939441	1.02825	0.148874	1.71195	0.0302	2.27821	0.0185316	2.46052	0.0576817	-2.04439	0.0216825	-2.55099	38.8568	128.588	9.47904	4.48125	29.0157	68.5865	16.0736	1
44	MAL13P1.63	MAL13P1.63_v7.1_P3/4	eukaryotic translation initation factor 4 gamma, putative	PF3D7_1312900	MAL13P1.63				Pf3D7_13_v3:548,586..552,841(+)	eukaryotic translation initation factor 4 gamma	7.12608e-05	5.17602e-08	3.89847e-05	0.000815563	-1.33473	0.0356871	-1.18757	0.017893	-1.21599	0.125441	-1.13141	0.00179107	-1.30514	8.54398e-05	-1.41965	2.9174e-05	-1.49951	6.45864	0.996334	48.2995	1.06441	8.14043	0.896981	0.749281	1
3271	MAL13P1.64	MAL13P1.64_v7.1_P1/1	ubiquitin-like protein nedd8 homologue, putative	PF3D7_1313000	MAL13P1.64				Pf3D7_13_v3:553,752..554,251(-)	ubiquitin-like protein nedd8 homologue, putative	0.192445	0.00181257	0.447312	0.00697024	-9.10005	0.00898319	-8.42142	0.765895	-1.25955	0.174975	-2.901	0.064484	-4.34531	0.862694	1.14336	0.0576484	-5.02731	1.52419	22.5015	11.453	24.1543	0.974468	10.2757	71.7056	1
998	MAL13P1.67	MAL13P1.67_v7.1_P2/2	methionyl-tRNA formyltransferase, putative	PF3D7_1313200	MAL13P1.67				Pf3D7_13_v3:566,236..568,233(+)	methionyl-tRNA formyltransferase, putative	8.2097e-11	0.77418	3.33895e-10	0.0848415	-1.3758	0.0592314	-1.42022	0.880537	-1.02759	0.551926	-1.11404	0.0577926	1.42323	0.00847622	1.65253	0.0144139	1.64133	21.6909	17.501	0.0836398	0.00964051	23.7428	13.6832	3.91892	1
2839	MAL13P1.69	MAL13P1.69_v7.1_P1/1	septum formation protein MAF homologue, putative	PF3D7_1313700	MAL13P1.69				Pf3D7_13_v3:587,015..587,809(-)	Maf-like protein, putative	8.69722e-08	0.689144	0.000686532	0.772105	1.07115	0.894066	-1.03209	0.989908	-1.003	0.965284	1.01038	0.105465	1.4793	0.243864	1.32208	0.554572	-1.16208	12.4636	17.2543	0.162771	0.0321908	5.63942	5.57648	6.7241	1
525	MAL13P1.70	MAL13P1.70_v7.1_P9/10	conserved Plasmodium membrane protein, unknown function	PF3D7_1313800	MAL13P1.70				Pf3D7_13_v3:588,800..599,198(-)	conserved Plasmodium membrane protein, unknown function	3.77083e-08	0.000371452	4.18095e-06	0.806675	-1.04176	0.511425	1.11636	0.0145179	1.53304	0.0371953	1.43292	0.0632467	1.37508	0.482891	-1.12488	0.747059	-1.05935	13.3845	9.19727	15.6187	1.53321	10.3784	5.09402	3.33762	1
2084	MAL13P1.72	MAL13P1.72_v7.1_P2/4	conserved Plasmodium protein, unknown function	PF3D7_1314000	MAL13P1.72				Pf3D7_13_v3:602,983..606,600(+)	conserved Plasmodium protein, unknown function	2.25623e-11	0.00994959	1.81815e-08	0.180004	-1.42409	0.041928	-1.72627	0.0614357	-1.64797	0.0641717	-1.63903	0.346843	1.27937	0.0380014	1.74642	0.219579	1.41243	23.8523	39.7348	7.45527	1.77422	17.1825	20.4456	8.09137	1
1675	MAL13P1.73	MAL13P1.73_v7.1_P3/3	conserved Plasmodium protein, unknown function	PF3D7_1314100	MAL13P1.73				Pf3D7_13_v3:607,794..610,052(+)	conserved Plasmodium protein, unknown function	6.71673e-11	3.12573e-07	8.92895e-11	0.736048	1.05697	0.304678	1.18519	0.359916	1.16335	0.0320395	1.43979	0.000155791	2.00052	8.97734e-05	2.06298	0.00725184	1.64523	22.0161	14.6151	40.1973	3.81206	26.2654	12.4542	3.22434	1
3312	MAL13P1.74	MAL13P1.74_v7.1_P2/2	conserved Plasmodium protein, unknown function	PF3D7_1314300	MAL13P1.74				Pf3D7_13_v3:619,131..620,525(-)	conserved Plasmodium protein, unknown function	6.63125e-17	1.34268e-06	2.38887e-13	0.405907	1.15161	3.73563e-05	-2.21418	7.73655e-06	-2.41919	0.189384	-1.25186	0.0623063	1.38169	0.24473	1.21964	0.877362	-1.02827	56.745	39.8754	34.2398	3.43725	40.3374	20.2469	3.41318	1
2451	MAL13P1.76	MAL13P1.76_v7.1_P1/2	TFIIH basal transcription factor subunit	PF3D7_1314900	MAL13P1.76				Pf3D7_13_v3:632,336..634,510(+)	general transcription factor IIH subunit 2	1.83998e-10	0.00165326	1.39332e-07	1.16198e-05	-2.26339	0.717597	-1.05978	0.715792	1.06019	0.153046	1.26199	0.00330218	1.65396	0.0261152	1.44819	0.0124677	-1.56689	20.4208	12.9276	11.683	1.05658	14.3822	6.50346	3.07487	1
2122	MAL13P1.78	MAL13P1.78_v7.1_P1/4	conserved Plasmodium protein, unknown function	PF3D7_1315200	MAL13P1.78				Pf3D7_13_v3:639,681..642,890(-)	conserved Plasmodium protein, unknown function	1.92927e-05	0.353397	0.000874311	0.367214	1.48337	0.750768	-1.14816	0.963697	-1.01998	0.416969	1.42553	0.133539	1.94097	0.174755	1.81856	0.0131463	3.34369	7.45947	34.6853	0.885281	0.588059	5.44537	18.0858	22.5849	1
3274	MAL13P1.79	MAL13P1.79_v7.1_P2/2	conserved Plasmodium protein, unknown function	PF3D7_1315400	MAL13P1.79				Pf3D7_13_v3:647,986..650,511(-)	zinc finger (CCCH type) protein, putative	0.00115326	0.341791	0.000344574	0.491532	1.07445	0.362679	-1.09997	0.806447	-1.02583	0.0226873	1.27955	0.123541	1.17713	0.0630319	-1.21953	0.773583	1.03253	4.54152	1.2096	0.929536	0.0353679	6.2061	1.18068	1.29366	1
1687	MAL13P1.81	MAL13P1.81_v7.1_P1/1	conserved Plasmodium protein, unknown function	PF3D7_1315500	MAL13P1.81				Pf3D7_13_v3:652,794..653,838(-)	conserved Plasmodium protein, unknown function	0.372709	6.53293e-05	0.020428	0.00245557	-3.12732	0.0021791	-3.17612	0.0236672	-2.28307	0.272185	1.47546	0.204544	-1.56955	0.0788234	-1.88038	0.00129694	-3.69293	1.12149	3.40182	20.7017	8.97063	3.10793	6.73378	14.7332	1
928	MAL13P1.82	MAL13P1.82_v7.1_P1/1	phosphatidylinositol synthase	PF3D7_1315600	MAL13P1.82				Pf3D7_13_v3:655,207..657,259(-)	CDP-diacylglycerol--inositol 3-phosphatidyltransferase	1.30631e-06	0.0921107	0.0121552	4.83522e-06	4.87919	0.787883	1.08248	0.309464	1.3519	0.622138	1.15644	0.259055	1.39854	0.354324	1.31577	0.000594337	3.26395	9.76345	20.8248	3.0042	0.915395	3.47192	5.28955	10.36	1
1267	MAL13P1.83	MAL13P1.83_v7.1_P4/4	exportin 1-like protein, putative	PF3D7_1315900	MAL13P1.83				Pf3D7_13_v3:663,741..667,929(+)	exportin-T, putative	1.64984e-08	0.463133	0.00461901	0.0168136	-1.3579	0.991961	-1.00124	0.753427	1.03928	0.709899	-1.0467	0.566328	1.073	0.448129	-1.09787	0.0248007	-1.35726	14.3401	5.30183	0.550687	0.0290857	4.1702	1.10129	1.79579	1
689	MAL13P1.86	MAL13P1.86_v7.1_P1/3	cholinephosphate cytidylyltransferase	PF3D7_1316600	MAL13P1.86				Pf3D7_13_v3:691,014..694,125(+)	choline-phosphate cytidylyltransferase	5.26123e-10	2.57232e-09	0.000108868	0.0706195	1.33375	5.20096e-06	-2.30049	0.00204917	-1.67397	0.213631	-1.21599	0.00310344	-1.6344	0.00513062	-1.5867	0.570824	-1.09902	18.8545	11.2116	63.9124	5.42926	7.20043	3.05833	2.88825	1
180	MAL13P1.88	MAL13P1.88_v7.1_P1/3	conserved Plasmodium protein, unknown function	PF3D7_1316900	MAL13P1.88				Pf3D7_13_v3:701,047..703,923(-)	conserved Plasmodium protein, unknown function	9.19559e-10	9.42378e-06	2.34592e-06	6.96779e-07	-1.48934	0.000191863	-1.31569	0.00040569	-1.2934	0.775011	1.01908	0.268207	-1.07665	0.135525	-1.10552	1.14191e-06	-1.51322	18.0602	1.94191	27.0496	0.415496	11.005	0.845215	0.522259	1
2424	MAL13P1.89	MAL13P1.89_v7.1_P1/1	conserved Plasmodium protein, unknown function	PF3D7_1317500	MAL13P1.89				Pf3D7_13_v3:734,604..734,873(-)	conserved Plasmodium protein, unknown function	1.81654e-15	0.000720937	1.20184e-11	0.00232269	2.16224	0.0176374	-1.79362	0.00249963	-2.14843	0.398835	-1.22156	0.393208	1.22452	0.109458	1.46958	0.870405	1.04202	45.7134	62.633	13.823	2.70559	30.494	29.8433	6.65488	1
2646	MAL13P1.90	MAL13P1.90_v7.1_P1/2	conserved Plasmodium protein, unknown function	PF3D7_1317600	MAL13P1.90				Pf3D7_13_v3:735,538..738,068(+)	conserved Plasmodium protein, unknown function	1.43657e-14	1.06186e-08	5.30633e-11	0.735785	1.06219	2.12205e-06	-2.74729	0.000225978	-2.07829	0.00275978	-1.77266	0.90226	-1.02218	0.514342	1.12397	0.0455925	1.4821	39.8345	31.2913	56.1913	6.30574	27.3155	15.3266	3.81545	1
3392	MAL13P1.92	MAL13P1.92_v7.1_P1/1	40S ribosomal protein S15/S19, putative	PF3D7_1317800	MAL13P1.92				Pf3D7_13_v3:740,527..741,454(+)	40S ribosomal protein S19	0.0242495	1.07729e-05	0.129683	0.000175537	-8.12728	0.00273943	-4.98821	0.154654	-2.06283	0.0716747	-2.52133	0.00780746	-4.08133	0.46081	-1.44927	0.000455113	-7.87461	2.70526	16.7178	26.5863	23.4709	1.84836	8.15887	30.0159	1
1915	MAL13P1.93	MAL13P1.93_v7.1_P1/3	small ribosomal subunit nuclear export protein, putative	PF3D7_1317900	MAL13P1.93				Pf3D7_13_v3:741,926..744,850(-)	nucleolar complex protein 4, putative	4.43707e-12	5.54467e-05	4.40302e-07	0.177681	-1.39606	0.19169	1.38113	0.148973	1.43038	0.319179	1.27769	0.0108175	1.92256	0.159344	1.41733	0.00143096	-2.45821	26.8164	39.3552	21.2105	4.44688	12.9397	13.5643	7.12825	1
3154	MAL13P1.94	MAL13P1.94_v7.1_P1/1	conserved Plasmodium membrane protein, unknown function	PF3D7_1318000	MAL13P1.94				Pf3D7_13_v3:745,947..746,525(-)	conserved Plasmodium membrane protein, unknown function	5.29131e-11	0.105025	5.09662e-12	0.0174312	2.19754	0.0348644	1.99843	0.0367973	1.98315	0.752134	1.1055	8.55708e-06	-5.19917	0.054214	-1.87414	0.63366	1.1758	22.4077	55.5362	2.77352	0.982003	32.4601	57.4647	12.0382	1
2784	MAL13P1.96	MAL13P1.96_v7.1_P2/4	chromosome segregation protein, putative	PF3D7_1318400	MAL13P1.96				Pf3D7_13_v3:760,326..764,139(-)	structural maintenance of chromosomes protein 2, putative	7.86007e-11	0.0134682	1.17212e-07	0.0640789	1.83516	0.735226	1.11423	0.312137	-1.38468	0.0216037	-2.14666	0.375944	-1.32923	0.591873	1.18731	0.410277	1.32674	21.7611	54.693	6.796	2.4401	14.6074	26.2238	12.2077	1
3699	MAL14_5S_1	MAL14_5S_1_v7.1_P1/1NU	product unspecified	PF3D7_1418500	MAL14_5S_1				Pf3D7_14_v3:779,377..779,495(+)	5S ribosomal RNA	0.114357	2.25258e-08	0.00340006	0.000161598	-8.15951	0.00445168	-4.51835	0.341473	-1.61215	0.104754	-2.282	0.000632991	-6.44506	0.000581766	-6.54123	6.43352e-06	-16.7725	1.82472	11.1675	52.3518	45.7711	4.39745	19.2234	29.7262	1
3284	MAL14_5S_2	MAL14_5S_2_v7.1_P1/1NU	product unspecified	PF3D7_1418600	MAL14_5S_2				Pf3D7_14_v3:780,006..780,124(+)	5S ribosomal RNA	0.075464	1.27153e-08	0.00221145	9.52755e-05	-8.73076	0.0030223	-4.78375	0.393331	-1.5276	0.0887001	-2.36042	0.000356606	-6.98484	0.000474222	-6.65073	4.09149e-06	-17.6494	2.06088	12.3619	55.2556	47.349	4.72196	20.2314	29.1349	1
2748	MAL14_5S_3	MAL14_5S_3_v7.1_P1/1NU	product unspecified	PF3D7_1418700	MAL14_5S_3				Pf3D7_14_v3:780,916..781,034(+)	5S ribosomal RNA	0.107166	3.3486e-08	0.00276398	0.000197781	-7.9126	0.00479793	-4.46639	0.426606	-1.49039	0.097997	-2.32503	0.00105789	-5.90355	0.000604041	-6.5203	8.77658e-06	-15.9562	1.86176	11.4354	50.3956	44.2204	4.55289	19.975	29.8338	1
2045	MAL14_tRNA.SelCys1	MAL14_TRNA.SELCYS1_v7.1_P1/1	product unspecified	PF3D7_1438200	MAL14_tRNA.SelCys1				Pf3D7_14_v3:1,545,135..1,545,239(-)	tRNA Selenocysteine	1.74962e-07	0.00115003	9.60696e-08	0.00140717	1.67358	0.00974007	1.5003	0.0159835	1.45582	0.0503153	1.3506	0.695498	1.06021	0.298597	-1.16922	0.596933	1.0882	11.7265	6.42468	12.6043	0.986513	14.8692	5.8189	2.66111	1
3649	MAL3_tRNA_Val1	MAL3_TRNA_VAL1_v7.1_P1/1	product unspecified	PF3D7_0312600	MAL3_tRNA_Val1				Pf3D7_03_v3:531,213..531,289(+)	tRNA Valine	0.309616	7.77151e-07	0.503913	0.0023244	-2.73861	0.171812	-1.53287	0.0326644	-1.9769	0.00499775	-2.50599	0.0150473	-2.18953	0.0427967	-1.90413	1.11874e-05	-5.37988	1.23845	2.89656	36.4139	12.1668	0.881643	1.47289	11.3602	1
3792	MAL4_tRNA_Ala1	MAL4_TRNA_ALA1_v7.1_P1/1	product unspecified	PF3D7_0411500	MAL4_tRNA_Ala1				Pf3D7_04_v3:517,722..517,793(+)	tRNA Alanine	0.023764	0.184563	0.0221097	0.0150794	-3.17344	0.0938355	-2.17615	0.303625	-1.60184	0.84973	1.08993	0.751232	1.15507	0.167705	1.88872	0.113873	-2.18705	2.71684	13.8073	1.83422	1.33167	3.05302	11.0827	24.6846	1
2919	MAL4_tRNA_Asn1	MAL4_TRNA_ASN1_v7.1_P1/1	product unspecified	PF3D7_0403000	MAL4_tRNA_Asn1				Pf3D7_04_v3:174,829..174,902(+)	tRNA Asparagine	8.05318e-07	0.0365018	1.43196e-08	0.351321	-1.65406	0.889753	-1.07721	0.439108	1.51725	0.407054	1.56368	0.0320967	-3.28758	0.00200161	-5.94565	0.0144246	-4.34015	10.2155	72.352	4.74018	4.79609	17.533	88.6988	34.401	1
395	MAL4_tRNA_Glu1	MAL4_TRNA_GLU1_v7.1_P1/1	product unspecified	PF3D7_0411600	MAL4_tRNA_Glu1				Pf3D7_04_v3:518,154..518,225(-)	tRNA Glutamic acid	3.84025e-07	0.174067	7.95346e-06	0.00575809	-3.14154	0.597982	-1.22967	0.398515	1.3939	0.969141	1.01525	0.263392	-1.55537	0.360364	-1.43351	1.57452e-05	-8.07081	10.9321	41.1919	1.92746	1.03752	9.70485	26.1199	18.3017	1
3292	MAL4_tRNA_Ser1	MAL4_TRNA_SER1_v7.1_P1/1	product unspecified	PF3D7_0410100	MAL4_tRNA_Ser1				Pf3D7_04_v3:469,218..469,299(+)	tRNA Serine	0.0944108	3.63204e-13	0.156614	0.0999984	-1.73004	0.000572598	-3.42724	4.8333e-06	-5.8023	1.42394e-05	-5.16143	2.74099e-05	-4.80662	0.000141102	-4.01405	0.000180245	-4.29128	1.93385	5.07569	130.066	48.7683	1.72001	3.22458	12.7483	1
2213	MAL5/7_5.8S:rRNA	A-type_5.8S_p	ncRNA	?	?	?	?	?	?	?	0.147603	1.01215e-10	0.00188874	0.000207768	-3.92892	0.00267521	-2.90718	0.00364686	-2.7974	0.0162771	-2.29973	0.00148262	-3.1238	3.6863e-06	-6.14989	8.35384e-07	-8.30187	1.67836	4.54858	84.1574	32.5824	4.84262	9.37436	13.1635	1
1054	MAL5_18S	MAL5_18S_v7.1_P2/2NU	product unspecified	PF3D7_0531600	MAL5_18S				Pf3D7_05_v3:1,289,601..1,291,692(+)	18S ribosomal RNA	0.107559	2.49621e-05	0.00909974	0.00519354	-2.69843	0.172475	-1.589	0.239626	-1.48844	0.323424	-1.3951	0.0247698	-2.18279	0.00147559	-3.15707	0.00014017	-4.58983	1.85967	5.12898	23.7616	9.36208	3.67796	7.24558	13.396	1
1104	MAL5_28S	MAL5_28S_v7.1_P1/4NU	product unspecified	PF3D7_0532000	MAL5_28S				Pf3D7_05_v3:1,292,410..1,296,199(+)	28S ribosomal RNA	0.0720954	7.46671e-07	0.00564738	0.00463142	-2.41824	0.0212902	-2.0204	0.0592741	-1.76554	0.145714	-1.54299	0.0237148	-1.99324	0.000342859	-3.18786	2.28368e-05	-4.60556	2.08674	4.4223	36.5758	11.0733	4.02279	6.08948	10.2935	1
3895	MAL5_5.8S	MAL5_5.8S_v7.1_P1/1NU	product unspecified	PF3D7_0531800	MAL5_5.8S				Pf3D7_05_v3:1,292,052..1,292,210(+)	5.8S ribosomal RNA	0.0509778	2.11756e-09	0.0143881	0.000623346	-3.69896	0.00536464	-2.80726	0.00479693	-2.84972	0.0143891	-2.44757	0.00165746	-3.27305	8.44331e-05	-4.70466	7.0379e-07	-9.49537	2.28287	6.86531	65.0234	27.9351	3.35294	7.2024	14.607	1
1744	MAL5_tRNA_Leu1	MAL5_TRNA_LEU1_v7.1_P1/1	product unspecified	PF3D7_0510600	MAL5_tRNA_Leu1				Pf3D7_05_v3:451,355..451,434(+)	tRNA Leucine	0.198541	0.668561	0.227254	0.10822	-2.90784	0.530864	1.50634	0.280214	-2.03401	0.640364	-1.35665	0.733636	1.24857	0.386496	1.76409	0.265209	-2.18935	1.50587	15.7466	0.186513	0.278618	1.46394	10.9343	50.79	1
835	MAL5_tRNA_Leu2	MAL5_TRNA_LEU2_v7.1_P1/1	product unspecified	PF3D7_0527800	MAL5_tRNA_Leu2				Pf3D7_05_v3:1,151,227..1,151,309(-)	tRNA Leucine	0.0195925	5.10732e-09	0.0396571	0.000791673	-5.25601	0.000216659	-6.4515	0.00562632	-3.78619	0.00444478	-3.94477	0.0240288	-2.89758	0.0669459	-2.3452	0.00360519	-4.50703	2.82758	14.3242	60.0962	43.4916	2.65139	9.59403	24.6058	1
3501	MAL5_tRNA_Phe1	MAL5_TRNA_PHE1_v7.1_P1/1	product unspecified	PF3D7_0514400	MAL5_tRNA_Phe1				Pf3D7_05_v3:603,951..604,023(-)	tRNA Phenylalanine	0.114461	0.000190846	0.503574	0.00189115	-4.86851	0.0481769	-2.61969	0.667783	-1.2256	0.0546101	-2.54804	0.115197	-2.13744	0.799187	-1.12803	0.00524608	-4.47526	1.8242	10.0589	17.5008	13.786	0.882177	3.4746	26.783	1
1063	MAL6_tRNA_Ala1	MAL6_TRNA_ALA1_v7.1_P1/1	product unspecified	PF3D7_0620800	MAL6_tRNA_Ala1				Pf3D7_06_v3:861,017..861,088(+)	tRNA Alanine	0.131399	0.0012805	0.356857	0.1122	-1.89351	0.0829176	-2.01276	0.210184	-1.64881	0.260252	-1.56557	0.303392	-1.50553	0.909616	-1.0458	0.0397916	-2.447	1.74524	6.68196	12.3292	6.74349	1.14327	3.12658	18.5964	1
3416	MAL6_tRNA_Leu1	MAL6_TRNA_LEU1_v7.1_P1/1	product unspecified	PF3D7_0620900	MAL6_tRNA_Leu1				Pf3D7_06_v3:861,685..861,765(-)	tRNA Leucine	0.00374883	0.00126772	0.0027746	0.0119928	-3.36553	0.0164008	-3.17197	0.0748747	-2.31658	0.487428	-1.37844	0.868952	-1.07896	0.783086	1.13526	0.036352	-2.90077	3.80451	19.8601	12.3548	9.2134	4.55	16.9655	25.355	1
3576	MAL6_tRNA_Ser1	MAL6_TRNA_SER1_v7.1_P1/1	product unspecified	PF3D7_0621600	MAL6_tRNA_Ser1				Pf3D7_06_v3:883,563..883,644(-)	tRNA Serine	0.182558	0.00720695	0.0326738	0.305054	-1.23752	0.13012	-1.3736	0.041126	-1.54408	0.148277	-1.35354	0.470449	-1.1611	0.543571	1.13379	0.0806208	-1.48283	1.55505	1.62656	8.17471	1.22152	2.78385	2.07991	5.08049	1
892	MAL7_18S	MAL7_18S_v7.1_P1/1NU	product unspecified	PF3D7_0725600	MAL7_18S				Pf3D7_07_v3:1,083,761..1,085,847(+)	18S ribosomal RNA	0.189436	9.77948e-07	0.00841063	0.000668682	-3.09234	0.0321246	-1.96142	0.0915209	-1.68796	0.245282	-1.42823	0.0134392	-2.195	0.000636166	-3.10889	3.53132e-05	-4.63392	1.53342	3.48087	35.4914	11.5094	3.73441	6.05509	11.0257	1
2920	MAL7_18Sa	MAL7_18SA_v7.1_P1/1NU	product unspecified	?	?	?	?	?	?	?	0.146315	0.824182	0.216721	0.612193	-1.43169	0.793337	1.20345	0.244248	2.29579	0.577003	1.48437	0.501531	-1.61034	0.316627	-2.03977	0.127096	-3.23036	1.68342	20.682	0.0501274	0.0879789	1.49688	13.1359	59.6736	1
2056	MAL7_28S	MAL7_28S_v7.1_P2/3NU	product unspecified	PF3D7_0726000	MAL7_28S				Pf3D7_07_v3:1,086,570..1,090,357(+)	28S ribosomal RNA	0.0378623	1.29227e-09	0.0049856	8.12378e-05	-3.00789	0.00360821	-2.15835	0.00215656	-2.26337	0.0224752	-1.80095	0.00835536	-1.99177	8.53969e-06	-3.62454	8.76327e-06	-3.95257	2.45143	3.70643	67.9018	14.6663	4.11404	4.44301	7.34375	1
3521	MAL7_28Sa	MAL7_28SA_v7.1_P1/1NU	product unspecified	?	?	?	?	?	?	?	0.0700837	3.43817e-09	0.00728044	0.000136557	-3.1019	0.0028526	-2.33228	0.00918382	-2.07	0.0612502	-1.66492	0.00142098	-2.49609	5.35911e-05	-3.37331	3.38187e-06	-4.76148	2.10276	3.64241	62.2792	15.4115	3.83833	4.74913	8.41356	1
3242	MAL7_5.8s	MAL7_5.8S_v7.1_P1/1NU	product unspecified	PF3D7_0725800	MAL7_5.8s				Pf3D7_07_v3:1,086,213..1,086,371(+)	5.8S ribosomal RNA	0.0897573	7.42872e-10	0.00705612	6.21211e-05	-4.13605	0.00303262	-2.69797	0.00480487	-2.55486	0.015259	-2.21294	0.001603	-2.90399	3.1841e-05	-4.43674	2.08977e-06	-6.65617	1.96255	4.73709	71.2302	24.5616	3.86095	6.65666	11.7239	1
2842	MAL7_tRNA_Ser1	MAL7_TRNA_SER1_v7.1_P1/1	product unspecified	PF3D7_0714900	MAL7_tRNA_Ser1				Pf3D7_07_v3:672,735..672,816(-)	tRNA Serine	0.0609124	0.69688	0.000614368	0.443268	-1.32204	0.0196882	-2.4132	0.557407	-1.23769	0.587163	1.21808	0.0588254	2.0211	0.0363143	2.19107	0.121362	-1.84278	2.18212	7.0591	0.154334	0.0713238	5.72936	13.2388	15.7127	1
3664	MAL7_tRNA_Thr2	MAL7_TRNA_THR2_v7.1_P1/1	product unspecified	PF3D7_0730700	MAL7_tRNA_Thr2				Pf3D7_07_v3:1,319,011..1,319,082(-)	tRNA Threonine	0.0439929	0.415613	0.526844	0.076282	-2.80772	0.979756	1.01454	0.309088	1.79149	0.573635	-1.37827	0.962384	1.02719	0.0122627	4.45378	0.0430617	-3.55614	2.36632	18.8434	0.67918	0.772632	0.846059	4.81237	38.6783	1
1039	MAL7_tRNA_Val1	MAL7_TRNA_VAL1_v7.1_P1/1NU	product unspecified	PF3D7_0730600	MAL7_tRNA_Val1				Pf3D7_07_v3:1,318,059..1,318,131(+)	tRNA Valine	0.366651	0.0115653	0.409813	0.14927	-1.69771	0.879257	-1.05644	0.659132	-1.17307	0.224408	-1.55873	0.147058	-1.70279	0.410602	-1.34829	0.00148642	-3.76464	1.132	3.63791	7.12566	3.27138	1.04084	2.38923	15.6094	1
3155	MAL7P1.10	MAL7P1.10_v7.1_P1/1	centrin, putative	PF3D7_0702900	MAL7P1.10				Pf3D7_07_v3:113,144..113,948(-)	centrin, putative	0.00254469	0.00202907	0.00328401	0.00783493	-1.8567	0.00121218	-2.16668	0.0715609	-1.5027	0.322785	-1.24569	0.293531	-1.26315	0.57489	1.13202	0.00421917	-2.0503	4.0425	4.8408	11.173	1.91134	4.42341	3.78353	5.81632	1
1301	MAL7P1.102	MAL7P1.102_v7.1_P1/5	conserved Plasmodium protein, unknown function	PF3D7_0719400	MAL7P1.102				Pf3D7_07_v3:848,398..853,593(-)	conserved Plasmodium protein, unknown function	1.11217e-12	0.915801	5.05144e-11	6.4924e-05	2.69417	0.00124512	2.15268	0.616656	1.11628	0.0307162	-1.63374	0.395619	-1.20602	0.374432	1.21648	0.00415226	2.04492	29.5702	35.0109	0.011345	0.00191891	27.4165	23.1864	5.75083	1
3720	MAL7P1.104	MAL7P1.104_v7.1_P1/1	3'-5' exoribonuclease Csl4 homolog, putative	PF3D7_0720000	MAL7P1.104				Pf3D7_07_v3:876,795..877,500(+)	exosome complex component CSL4, putative	0.000309462	0.000306728	0.000341844	3.24508e-05	-2.73389	0.000506097	-2.24248	0.0463832	-1.54403	0.285405	-1.25616	0.093876	-1.43642	0.446827	-1.17553	0.252249	-1.29904	5.41371	5.97004	16.1516	2.54448	6.21276	4.89371	5.35627	1
3829	MAL7P1.107	MAL7P1.107_v7.1_P1/1	conserved Plasmodium protein, unknown function	PF3D7_0720600	MAL7P1.107				Pf3D7_07_v3:887,816..889,378(-)	conserved Plasmodium protein, unknown function	1.57004e-06	2.02956e-06	5.55239e-09	1.35462e-08	-2.33432	0.000166832	-1.62222	0.360596	-1.11182	0.00096886	-1.51157	0.0645499	-1.24422	0.867431	-1.01942	0.00307049	-1.47671	9.59481	3.1352	32.6438	1.52382	18.9726	4.4282	1.58712	1
428	MAL7P1.108	MAL7P1.108_v7.1_P1/7	phosphoinositide-binding protein, putative	PF3D7_0720700	MAL7P1.108				Pf3D7_07_v3:891,683..899,051(+)	phosphoinositide-binding protein, putative	5.29466e-14	0.0381689	1.38465e-15	0.00194386	-1.5066	0.633182	-1.06053	0.00152884	1.52291	0.210936	1.16836	3.25305e-05	-1.79322	0.00060762	-1.58589	0.0315893	-1.33978	36.4767	13.5685	4.6524	0.247226	57.2484	15.2108	1.80674	1
1274	MAL7P1.110	MAL7P1.110_v7.1_P1/1	Ham1-like protein, putative	PF3D7_0720800	MAL7P1.110				Pf3D7_07_v3:899,751..901,137(+)	Ham1-like protein, putative	4.76433e-11	9.39958e-06	3.84503e-10	0.10202	-1.69023	0.00667315	-2.46562	0.000106416	-3.9321	0.266437	-1.42317	0.69224	-1.13279	0.932069	1.02718	0.272262	-1.45151	22.5816	55.0162	27.0585	9.41762	23.4842	40.868	11.8336	1
3822	MAL7P1.111	MAL7P1.111_v7.1_P1/1	conserved Plasmodium protein, unknown function	PF3D7_0720900	MAL7P1.111				Pf3D7_07_v3:901,549..902,787(+)	conserved Plasmodium protein, unknown function	0.138979	0.0824314	0.719915	0.149794	-4.53885	0.309732	-2.88218	0.211258	3.69852	0.0384784	-9.11931	0.0706261	-6.79335	0.342108	2.68867	0.0430012	-10.0459	1.71303	45.0857	3.20262	12.0415	0.573306	10.7778	127.836	1
3700	MAL7P1.112	MAL7P1.112_v7.1_P2/3	conserved Plasmodium protein, unknown function	PF3D7_0721200	MAL7P1.112				Pf3D7_07_v3:917,958..920,816(-)	conserved Plasmodium protein, unknown function	4.67963e-08	0.00200552	7.9752e-07	0.22173	-1.18518	0.070835	1.28988	0.00160878	1.59663	0.803478	-1.03482	0.473216	-1.10407	0.207227	1.19183	0.389823	-1.13553	13.1423	6.11511	11.2018	0.744601	12.2314	4.0652	2.26002	1
1367	MAL7P1.113	MAL7P1.113_v7.1_P2/3	DEAD/DEAH box ATP-dependent RNA helicase, putative	PF3D7_0721300	MAL7P1.113				Pf3D7_07_v3:922,285..924,984(+)	ATP-dependent RNA helicase DBP7, putative	4.02287e-12	1.81848e-11	2.609e-06	0.282949	1.21988	0.00315604	1.78403	0.00140459	1.88426	0.019005	1.56622	1.03932e-05	2.56384	0.00181983	1.85197	0.509073	1.13878	27.0041	22.3837	96.5779	11.4362	10.8882	6.44658	4.02607	1
3596	MAL7P1.114	MAL7P1.114_v7.1_P1/1	P36-like protein homologue, putative	PF3D7_0721400	MAL7P1.114				Pf3D7_07_v3:926,692..928,028(+)	conserved Plasmodium protein, unknown function	1.41488e-14	6.98381e-12	2.87518e-08	0.481073	-1.11754	0.000139478	-1.95309	9.74987e-05	-1.99076	0.00103064	-1.75067	0.00949635	-1.53551	0.21487	-1.21794	0.0584505	-1.3862	39.8752	24.2355	104.068	9.03586	16.5232	7.17326	2.9521	1
3490	MAL7P1.117	MAL7P1.117_v7.1_P1/1	conserved Plasmodium protein, unknown function	PF3D7_0721800	MAL7P1.117				Pf3D7_07_v3:938,279..938,895(+)	conserved Plasmodium protein, unknown function	0.237216	0.0418013	0.753184	0.0281943	-6.3744	0.106962	-3.81105	0.797427	-1.23248	0.203945	-2.84796	0.348104	-2.15708	0.499985	1.73481	0.0128289	-9.671	1.4004	22.8354	4.47491	10.4242	0.528329	6.15367	79.2024	1
2552	MAL7P1.118	MAL7P1.118_v7.1_P1/2	PelOta protein homologue, putative	PF3D7_0722100	MAL7P1.118				Pf3D7_07_v3:944,023..945,234(+)	protein pelota homolog, putative	9.26217e-07	6.93081e-05	8.21768e-07	0.000962556	-1.79548	0.358638	1.16263	0.00206133	1.71653	0.106238	1.30826	0.0676252	1.35753	0.00638725	1.60105	0.366775	-1.17157	10.0835	6.6035	20.5195	1.91969	12.1964	5.70512	3.18085	1
1336	MAL7P1.119	MAL7P1.119_v7.1_P1/3	rhoptry-associated leucine zipper-like protein 1	PF3D7_0722200	MAL7P1.119				Pf3D7_07_v3:946,363..948,612(+)	rhoptry-associated leucine zipper-like protein 1	8.23733e-10	6.04682e-05	4.30771e-11	0.522214	1.37431	0.575151	1.32085	0.259378	1.75769	0.00152499	-5.44778	9.96174e-07	-18.658	0.0380946	-2.8893	0.353033	-1.64044	18.2147	109.992	20.9409	18.0649	27.7452	119.674	29.3305	1
844	MAL7P1.12	MAL7P1.12_v7.1_P2/7	erythrocyte membrane-associated antigen	PF3D7_0703500	MAL7P1.12				Pf3D7_07_v3:135,606..142,505(+)	erythrocyte membrane-associated antigen	3.32128e-10	0.00011971	6.28505e-06	0.774786	-1.03343	0.41648	1.09832	0.0770264	1.23109	0.30142	1.12709	0.0130748	1.34798	0.271436	1.13593	0.236011	-1.15839	19.5285	6.33982	18.867	0.875006	9.94863	2.30697	1.57684	1
224	MAL7P1.120	MAL7P1.120_v7.1_P3/4	ubiquitin carboxyl-terminal hydrolase, putative	PF3D7_0722300	MAL7P1.120				Pf3D7_07_v3:949,449..953,114(-)	ubiquitin carboxyl-terminal hydrolase, putative	4.19217e-10	2.09796e-07	8.26689e-05	0.532843	-1.07555	0.0157378	1.34158	0.00555622	1.40812	0.682984	1.04876	0.00193549	1.47458	0.0581765	1.25433	0.594639	1.06863	19.1851	6.4018	41.9195	1.99828	7.44726	1.77504	1.62076	1
912	MAL7P1.122	MAL7P1.122_v7.1_P2/2	GTP binding protein, putative	PF3D7_0722400	MAL7P1.122				Pf3D7_07_v3:954,784..956,343(+)	Obg-like ATPase 1, putative	7.104e-06	2.32551e-07	0.000349288	0.182975	1.22033	0.0873764	1.29411	0.133586	1.25247	0.0253892	1.40849	0.000970372	1.69726	0.00224715	1.62268	0.899638	-1.0201	8.27436	4.4342	41.4708	3.17486	6.19473	2.37123	2.60292	1
539	MAL7P1.125	MAL7P1.125_v7.1_P2/3	conserved Plasmodium protein, unknown function	PF3D7_0723300	MAL7P1.125				Pf3D7_07_v3:975,766..978,408(+)	conserved Plasmodium protein, unknown function	2.5806e-11	0.00672274	1.84264e-11	0.15713	1.53873	0.057519	1.79609	0.0925621	1.67459	0.0257799	-2.00284	0.00119636	-2.86711	0.0365478	-1.91245	0.800091	-1.08467	23.6198	52.3483	8.33219	2.63808	29.5509	46.7809	10.7648	1
2426	MAL7P1.126	MAL7P1.126_v7.1_P4/4	conserved Plasmodium protein, unknown function	PF3D7_0723900	MAL7P1.126				Pf3D7_07_v3:1,000,701..1,004,746(-)	RNA-binding protein, putative	1.28346e-08	0.130697	2.14221e-10	0.000768763	-1.51237	0.0500466	-1.25542	0.190103	1.16147	0.420667	1.09555	0.136721	1.18606	0.0140659	1.33623	0.207135	1.16639	14.6395	4.583	2.39867	0.107274	24.57	5.49415	1.52056	1
1259	MAL7P1.127	MAL7P1.127_v7.1_P5/6	conserved Plasmodium membrane protein, unknown function	PF3D7_0724000	MAL7P1.127				Pf3D7_07_v3:1,006,335..1,012,145(+)	Rab GTPase activator and protein kinase, putative	8.10024e-11	0.140874	2.68281e-07	0.000623515	1.83919	0.17307	1.25226	0.27063	1.19843	0.0956107	-1.31927	0.616116	1.08523	0.000814452	1.81112	0.000250456	2.02722	21.7125	14.1697	2.27308	0.211919	13.5492	6.31591	3.16981	1
779	MAL7P1.129	MAL7P1.129_v7.1_P2/3	conserved Plasmodium protein, unknown function	PF3D7_0724100	MAL7P1.129				Pf3D7_07_v3:1,013,295..1,016,449(-)	conserved Plasmodium protein, unknown function	2.05776e-05	1.31262e-10	0.000389721	1.49473e-06	-2.28646	0.00042637	-1.74215	5.73434e-06	-2.14509	0.000860024	-1.68159	0.000516815	-1.72545	0.0375174	-1.36048	8.26117e-05	-1.97302	7.4084	3.74175	82.384	5.94422	6.10339	2.20188	2.45319	1
3775	MAL7P1.131	MAL7P1.131_v7.1_P1/1	conserved Plasmodium protein, unknown function	PF3D7_0724500	MAL7P1.131				Pf3D7_07_v3:1,024,672..1,026,167(+)	conserved Plasmodium protein, unknown function	1.11339e-09	2.19578e-09	5.49939e-06	0.0278851	1.61265	0.000307203	2.30688	0.000669187	2.1791	0.0125915	1.72987	0.00209427	1.99948	0.515965	1.14631	0.997271	1.00077	17.794	19.2312	64.8153	10.0072	10.0883	7.78798	5.24945	1
739	MAL7P1.132	MAL7P1.132_v7.1_P6/6	conserved Plasmodium protein, unknown function	PF3D7_0724600	MAL7P1.132				Pf3D7_07_v3:1,026,444..1,033,077(-)	protein kinase, putative	1.18562e-12	0.176707	4.53842e-09	0.0451729	1.43355	0.0460654	1.4313	0.767402	1.05299	0.0095682	-1.60897	0.434102	-1.14693	0.164203	1.27919	0.027633	1.53121	29.4379	22.0522	1.90338	0.203691	19.2893	10.3213	3.63853	1
1430	MAL7P1.134	MAL7P1.134_v7.1_P7/10	conserved Plasmodium protein, unknown function	PF3D7_0724700	MAL7P1.134				Pf3D7_07_v3:1,034,969..1,046,109(-)	conserved Plasmodium protein, unknown function	1.76021e-14	8.26764e-09	2.01227e-11	0.0177047	-1.24535	0.988652	-1.00126	0.00599362	1.29438	0.133135	1.14503	1.46258e-05	1.56023	5.79664e-05	1.49787	0.180817	-1.13719	39.2944	7.60335	57.5074	1.58964	29.3594	4.05782	0.939842	1
1726	MAL7P1.137	MAL7P1.137_v7.1_P2/2	kelch protein, putative	PF3D7_0724800	MAL7P1.137				Pf3D7_07_v3:1,047,427..1,049,362(-)	kelch domain-containing protein, putative	2.78433e-05	0.0397042	1.09472e-07	0.421641	-1.30595	0.0455702	1.97607	0.857377	1.06123	0.102797	-1.73358	0.20306	-1.53099	0.0768246	-1.81999	0.00828155	-2.67432	7.17127	19.2884	4.5752	1.75797	14.6969	28.2357	13.0641	1
2624	MAL7P1.138	MAL7P1.138_v7.1_P1/5	conserved Plasmodium membrane protein, unknown function	PF3D7_0725100	MAL7P1.138				Pf3D7_07_v3:1,065,252..1,070,240(+)	conserved Plasmodium membrane protein, unknown function	8.77084e-05	2.0893e-08	0.0726941	0.0754477	1.2323	0.000646561	1.53404	0.00258189	1.44851	0.0844405	1.22441	0.13148	1.19249	0.0151708	1.33819	0.0032425	1.47063	6.30594	2.04345	52.7283	2.44096	2.24003	0.51849	1.57397	1
3457	MAL7P1.139	MAL7P1.139_v7.1_P1/1	mago nashi protein homolog, putative	PF3D7_0725200	MAL7P1.139				Pf3D7_07_v3:1,070,980..1,071,737(+)	mago nashi protein homologue, putative	3.18864e-07	2.456e-06	7.9057e-08	0.382479	-1.1082	0.606035	1.06231	0.0213748	1.32333	0.269009	1.13937	0.00111085	1.51239	0.00120653	1.50714	0.0161297	1.3693	11.1168	3.74348	31.9204	1.53556	15.1287	3.63889	1.6356	1
3796	MAL7P1.14	MAL7P1.14_v7.1_P1/1	conserved Plasmodium protein, unknown function	PF3D7_0703700	MAL7P1.14				Pf3D7_07_v3:146,645..147,394(-)	conserved Plasmodium protein, unknown function	3.68354e-09	8.88536e-09	0.00019616	0.137045	1.3276	0.020712	1.57063	0.0616742	1.43274	0.0819458	1.39593	0.000502948	2.0454	0.00296312	1.81434	0.122127	-1.37079	16.1943	14.0057	57.1265	7.058	6.68466	4.12946	4.20072	1
43	MAL7P1.141	MAL7P1.141_v7.1_P1/1	conserved Plasmodium protein, unknown function	PF3D7_0725400	MAL7P1.141				Pf3D7_07_v3:1,079,015..1,080,055(+)	conserved Plasmodium protein, unknown function	1.72585e-13	4.68424e-05	7.82227e-15	0.158332	-1.70483	0.170279	1.6789	0.91229	1.0419	0.605991	1.21234	8.04869e-08	-12.3619	0.000422792	-4.24118	0.0122978	-2.84479	33.6492	114.956	21.7392	10.6097	50.984	124.412	16.5935	1
1995	MAL7P1.144	MAL7P1.144_v7.1_P1/3	serine/threonine protein kinase, FIKK family	PF3D7_0726200	MAL7P1.144				Pf3D7_07_v3:1,100,134..1,102,967(+)	serine/threonine protein kinase, FIKK family	1.30039e-12	0.217892	1.48467e-10	0.0895381	-1.70375	0.0179798	-2.13403	0.84933	-1.0601	0.246233	1.43292	0.873031	1.05032	0.991156	1.00341	6.34828e-05	-4.41974	29.2477	67.8978	1.57604	0.522675	25.2698	41.9022	11.2757	1
956	MAL7P1.145	MAL7P1.145_v7.1_P3/4	mismatch repair protein pms1 homologue, putative	PF3D7_0726300	MAL7P1.145				Pf3D7_07_v3:1,104,156..1,108,364(+)	DNA mismatch repair protein PMS1, putative	0.000856686	1.55363e-09	9.61998e-06	9.63484e-05	-2.08998	0.0797569	-1.35171	0.0606977	-1.38227	1.33512e-05	-2.33588	6.04838e-05	-2.14591	0.00723717	-1.61092	4.55783e-05	-2.30103	4.73375	3.29189	66.8184	6.638	9.51022	4.72391	3.37769	1
712	MAL7P1.146	MAL7P1.146_v7.1_P3/14	conserved Plasmodium membrane protein, unknown function	PF3D7_0726400	MAL7P1.146				Pf3D7_07_v3:1,108,831..1,124,492(-)	conserved Plasmodium membrane protein, unknown function	0.00195068	0.00014067	3.38183e-08	0.298361	1.11018	0.693289	1.04015	2.55189e-05	1.61884	0.570789	-1.05829	0.866182	-1.01695	0.00755405	1.32463	0.00010766	1.58948	4.20812	1.02951	18.3898	0.642719	16.2939	2.84734	1.18829	1
1486	MAL7P1.147	MAL7P1.147_v7.1_P8/9	ubiquitin carboxyl-terminal hydrolase, putative	PF3D7_0726500	MAL7P1.147				Pf3D7_07_v3:1,126,556..1,136,577(-)	ubiquitin carboxyl-terminal hydrolase, putative	7.85733e-07	3.16078e-05	1.77394e-06	0.0368124	-1.19301	0.0897182	1.15239	0.0039792	1.28517	0.989818	1.00104	0.316879	1.08599	0.00618126	1.26753	0.0467361	1.19621	10.2389	1.68627	22.994	0.540993	11.3155	1.33113	0.799938	1
2613	MAL7P1.149	MAL7P1.149_v7.1_P3/3	conserved Plasmodium protein, unknown function	PF3D7_0727100	MAL7P1.149				Pf3D7_07_v3:1,152,155..1,155,355(-)	conserved Plasmodium protein, unknown function	1.75874e-06	0.043142	0.00163427	0.370663	-1.49381	0.0321235	-2.68721	0.632497	-1.23796	0.703473	-1.18507	0.808541	-1.11408	0.290353	1.60822	0.23478	-1.77185	9.4916	46.3903	4.41365	3.08168	4.95413	17.2953	23.7393	1
496	MAL7P1.15	MAL7P1.15_v7.1_P6/12	conserved Plasmodium membrane protein, unknown function	PF3D7_0703900	MAL7P1.15				Pf3D7_07_v3:153,320..166,396(-)	conserved Plasmodium membrane protein, unknown function	9.27623e-13	0.0760771	4.16816e-07	0.00365425	-1.8382	0.777969	-1.05698	0.871812	-1.03221	0.458225	1.15755	0.172997	1.31181	0.82676	1.04394	0.000153518	-2.42947	29.9481	28.4404	3.34775	0.454173	13.0063	8.8225	4.61261	1
1241	MAL7P1.151	MAL7P1.151_v7.1_P1/2	DNA (cytosine-5)-methyltransferase, putative;with=InterPro:IPR001525	PF3D7_0727300	MAL7P1.151				Pf3D7_07_v3:1,159,700..1,161,820(-)	DNA (cytosine-5)-methyltransferase	6.6626e-13	6.39179e-08	4.07675e-08	0.0061563	-1.40515	0.0229255	1.31975	0.00841304	1.38511	0.348496	1.11706	0.000450566	1.57194	0.00425034	1.42881	0.752483	-1.04037	30.6479	10.3795	47.3033	2.28859	16.0325	3.87836	1.64496	1
3182	MAL7P1.153	MAL7P1.153_v7.1_P2/2	actin-like protein, putative	PF3D7_0728200	MAL7P1.153				Pf3D7_07_v3:1,211,657..1,213,517(+)	actin-like protein, putative	5.43677e-07	0.236941	1.09588e-05	0.453569	1.36511	0.213251	1.68323	0.913229	1.0461	0.0214757	-2.6902	0.578205	-1.25918	0.550283	1.28105	0.429028	1.42086	10.5919	44.5809	1.44939	0.871489	9.3781	28.1943	20.4435	1
2270	MAL7P1.154	MAL7P1.154_v7.1_P1/1	conserved Plasmodium protein, unknown function	PF3D7_0728400	MAL7P1.154				Pf3D7_07_v3:1,215,174..1,215,763(+)	conserved Plasmodium protein, unknown function	7.88095e-13	6.92533e-06	1.21503e-08	0.348811	1.30351	0.434055	-1.24717	0.000848267	-2.77627	0.100507	-1.60167	0.252691	-1.38354	0.826046	-1.06374	0.312356	-1.35782	30.2911	58.8939	28.1306	7.81334	17.7769	24.6879	9.44358	1
99	MAL7P1.155	MAL7P1.155_v7.1_P2/7	zinc finger, C3HC4 type, putative	PF3D7_0728600	MAL7P1.155				Pf3D7_07_v3:1,218,426..1,225,473(+)	RING zinc finger protein, putative	7.7703e-08	0.0325873	1.23383e-06	0.584456	1.23143	0.265977	1.53176	0.658542	1.18305	0.00992546	-2.80058	0.0855891	-1.94952	0.873774	1.06221	0.866021	1.07092	12.5852	44.6832	4.96487	2.51822	11.7263	29.7384	17.2451	1
2880	MAL7P1.157	MAL7P1.157_v7.1_P1/2	conserved Plasmodium protein, unknown function	PF3D7_0728800	MAL7P1.157				Pf3D7_07_v3:1,230,589..1,232,180(+)	conserved Plasmodium protein, unknown function	2.06508e-14	0.00387937	4.27086e-11	0.189203	1.42988	0.071516	-1.64297	0.0117308	-2.03585	0.424208	-1.24097	0.326816	1.30413	0.261164	1.35659	0.454525	1.24094	38.8744	69.1659	9.60598	2.44159	27.7631	35.2832	8.64191	1
1762	MAL7P1.158	MAL7P1.158_v7.1_P1/1	signal recognition particle SRP9	PF3D7_0729000	MAL7P1.158				Pf3D7_07_v3:1,235,699..1,236,707(+)	signal recognition particle subunit SRP9	5.66112e-09	0.858703	0.000687232	0.00138483	-1.60428	0.598687	-1.07477	0.914063	-1.01486	0.360109	-1.13417	0.947956	-1.00896	0.704134	-1.05335	0.139302	-1.24563	15.6463	7.19806	0.0321777	0.00211475	5.6386	1.85288	2.23452	1
448	MAL7P1.159	MAL7P1.159_v7.1_P1/1	1-cys peroxiredoxin	PF3D7_0729200	MAL7P1.159				Pf3D7_07_v3:1,247,398..1,248,264(+)	1-cys peroxiredoxin	4.10901e-10	0.0578681	6.36352e-08	0.951617	1.02439	0.649651	1.19802	0.00125396	-4.00353	0.703855	-1.16313	0.451066	1.3506	0.230875	1.61756	0.625456	1.23072	19.2144	74.5775	3.85341	2.13662	15.421	42.7528	18.8522	1
518	MAL7P1.16	MAL7P1.16_v7.1_P2/10	conserved Plasmodium membrane protein, unknown function	PF3D7_0704000	MAL7P1.16				Pf3D7_07_v3:167,489..177,295(-)	conserved Plasmodium membrane protein, unknown function	1.80474e-13	2.79414e-11	6.23018e-11	7.57603e-05	-1.49504	0.0199727	1.24387	6.66438e-05	1.50087	0.0509697	1.19821	1.79767e-05	1.56129	1.04652e-07	1.82158	0.962067	1.00459	33.546	6.69275	93.3512	2.66063	26.9882	3.846	0.969045	1
2474	MAL7P1.160-a	MAL7P1.160-A_v7.1_P1/1	conserved Plasmodium protein, unknown function	?	?	?	?	?	?	?	1.03754e-08	0.0102557	4.60061e-06	0.0178042	2.58917	0.781997	1.11243	0.0284696	-2.3966	0.204908	-1.63839	0.455775	-1.33401	0.976494	1.0114	0.864864	1.07254	14.8966	54.2903	7.38858	3.84679	10.2767	26.7523	17.7018	1
1522	MAL7P1.163	MAL7P1.163_v7.1_P1/1	conserved Plasmodium protein, unknown function	PF3D7_0730000	MAL7P1.163				Pf3D7_07_v3:1,281,785..1,282,322(-)	conserved Plasmodium protein, unknown function	1.3786e-13	0.0317494	2.49446e-12	0.0326918	1.54403	0.771115	-1.05887	0.850026	-1.03787	0.0201676	1.60885	1.9878e-05	2.627	0.0201071	1.60926	0.224139	-1.29462	34.1718	32.4801	5.01681	0.681207	34.1748	23.2021	4.61668	1
781	MAL7P1.164	MAL7P1.164_v7.1_P1/3	adapter-related protein, putative	PF3D7_0730200	MAL7P1.164				Pf3D7_07_v3:1,286,057..1,289,399(-)	AP-4 complex subunit beta, putative	7.99983e-06	2.18931e-09	0.00119251	0.892643	1.02127	0.000325146	1.8569	8.21686e-05	1.99808	0.161272	1.24813	0.0264697	1.43206	0.00159949	1.70051	0.70666	1.06481	8.17512	4.89182	64.8322	5.54203	5.19971	2.22243	2.90641	1
511	MAL7P1.167	MAL7P1.167_v7.1_P2/8	conserved Plasmodium protein, unknown function	PF3D7_0730500	MAL7P1.167				Pf3D7_07_v3:1,305,894..1,314,215(-)	conserved Plasmodium protein, unknown function	7.85649e-14	0.000190674	1.27741e-13	0.00444774	2.00581	0.00236983	2.11785	0.00397161	-2.02577	0.00209626	-2.14001	0.0111612	-1.84613	0.161944	-1.38622	0.984874	-1.00467	35.5105	46.2815	17.5034	3.25893	42.1303	39.2209	6.33041	1
491	MAL7P1.17	MAL7P1.17_v7.1_P3/10	conserved Plasmodium membrane protein, unknown function	PF3D7_0704100	MAL7P1.17				Pf3D7_07_v3:180,036..190,715(+)	conserved Plasmodium membrane protein, unknown function	6.48636e-12	1.17142e-05	2.80371e-12	0.171604	1.60199	0.260933	1.47074	0.386746	1.34429	1.71158e-05	-5.40653	1.93967e-05	-5.33055	0.0806144	-1.83612	0.475717	-1.29714	26.0989	74.2239	26.2982	10.6844	33.8894	68.8428	13.8135	1
1859	MAL7P1.170	MAL7P1.170_v7.1_P1/1	Plasmodium exported protein, unknown function	PF3D7_0730800	MAL7P1.170				Pf3D7_07_v3:1,321,306..1,322,367(+)	Plasmodium exported protein, unknown function, unspecified product	0.0204313	0.153798	0.14259	0.0878308	-4.2353	0.396533	-2.02432	0.719465	1.34642	0.280465	-2.46144	0.178241	-3.0925	0.827143	-1.19809	0.0548477	-5.73144	2.80349	47.2317	2.12809	5.12184	1.7839	21.4673	81.8306	1
1119	MAL7P1.171	MAL7P1.171_v7.1_P4/6	Plasmodium exported protein, unknown function	PF3D7_0730900	MAL7P1.171				Pf3D7_07_v3:1,325,375..1,331,813(+)	EMP1-trafficking protein	1.0743e-11	0.00373325	1.73555e-10	0.055025	-1.67491	0.00291285	-2.29937	0.0107217	-2.01552	0.853967	1.04932	0.640748	1.13	0.0560547	-1.67108	2.09953e-05	-3.93047	25.1698	42.3547	9.69683	2.33106	24.97	30.0132	8.17341	1
248	MAL7P1.172	MAL7P1.172_v7.1_P3/3	Plasmodium exported protein (PHISTc), unknown function	PF3D7_0731100	MAL7P1.172				Pf3D7_07_v3:1,338,959..1,341,790(+)	EMP1-trafficking protein	8.48568e-09	0.567458	2.15353e-08	0.0574609	-2.28466	0.152355	-1.84997	0.0255793	2.66747	0.416411	1.41294	0.465782	-1.36335	0.0111742	-3.08789	0.00860046	-3.49991	15.1425	66.7698	0.333418	0.210026	16.9369	53.3444	21.4172	1
736	MAL7P1.174	MAL7P1.174_v7.1_P1/1	Plasmodium exported protein (PHISTb), unknown function	PF3D7_0731300	MAL7P1.174				Pf3D7_07_v3:1,350,032..1,351,149(+)	Plasmodium exported protein (PHISTb), unknown function	8.67967e-09	0.480338	3.25721e-05	0.0233464	-2.3873	0.089661	-1.89677	0.650787	-1.18217	0.462137	1.31328	0.827711	-1.08368	0.859644	-1.06747	6.79081e-05	-5.91305	15.1147	50.6872	0.50924	0.243962	8.31045	19.9065	16.2884	1
2998	MAL7P1.175	MAL7P1.175_v7.1_P2/2	serine/threonine protein kinase, FIKK family, pseudogene	PF3D7_0731400	MAL7P1.175				Pf3D7_07_v3:1,353,758..1,355,482(+)	serine/threonine protein kinase, FIKK family, pseudogene	2.11933e-12	0.0738509	2.20845e-10	0.22679	-1.19618	0.334512	-1.15311	0.395895	-1.1333	0.363869	1.14332	0.00512672	1.54567	0.94851	1.00951	6.94543e-05	-2.02308	28.2591	14.9478	3.40185	0.257062	24.5126	9.26149	2.56922	1
147	MAL7P1.176	MAL7P1.176_v7.1_P4/5	erythrocyte binding antigen-175	PF3D7_0731500	MAL7P1.176				Pf3D7_07_v3:1,358,055..1,362,929(+)	erythrocyte binding antigen-175	1.72329e-12	0.142711	2.88929e-14	0.0628552	2.23079	0.00215265	3.99623	0.00242732	3.92248	0.00305038	3.78486	0.00233961	-3.94498	0.00128804	-4.3231	0.709938	1.18208	28.6744	124.647	2.25155	1.39821	46.6612	144.883	21.114	1
1868	MAL7P1.177	MAL7P1.177_v7.1_P1/1	Plasmodium exported protein (hyp9), unknown function	PF3D7_0731700	MAL7P1.177				Pf3D7_07_v3:1,372,063..1,372,760(+)	Plasmodium exported protein (hyp9), unknown function	2.55127e-12	8.70129e-05	4.12295e-09	0.122798	1.43122	0.405694	-1.21016	0.00109819	-2.24369	0.00742559	-1.90616	0.454504	-1.18698	0.569475	1.13898	0.0400676	1.67708	27.891	35.7567	19.8247	3.6308	19.4415	17.8031	6.22693	1
2868	MAL7P1.178	MAL7P1.178_v7.1_P2/2	alpha/beta hydrolase, putative	PF3D7_0731800	MAL7P1.178				Pf3D7_07_v3:1,378,618..1,380,769(+)	alpha/beta hydrolase, putative	2.144e-10	0.685331	5.75209e-09	0.531156	-1.30959	0.169847	1.8182	0.0280177	2.66023	0.808378	-1.10981	0.0151137	-2.97704	0.0682575	-2.2317	0.128818	-2.03275	20.1868	91.6227	0.167027	0.108299	18.9174	61.3294	22.0453	1
3071	MAL7P1.18	MAL7P1.18_v7.1_P4/5	serine/threonine protein kinase, putative	PF3D7_0704500	MAL7P1.18				Pf3D7_07_v3:208,690..213,501(-)	serine/threonine protein kinase, putative	3.73322e-09	0.00858212	2.01418e-09	0.29439	1.6324	0.326481	1.58111	0.0769903	2.31453	0.000649017	-5.6295	0.0021659	-4.60428	0.620653	-1.2584	0.68688	-1.2214	16.177	85.5528	7.78291	5.88002	20.6039	77.8315	25.6872	1
2550	MAL7P1.185	MAL7P1.185_v7.1_P1/2	rifin	PF3D7_0732500	MAL7P1.185				Pf3D7_07_v3:1,402,623..1,403,978(-)	rifin	0.139428	0.000409155	0.104732	0.103179	-4.02423	0.109422	-3.92253	0.0412798	-5.83324	0.122002	-3.73823	0.184683	-3.08238	0.388498	-2.06737	0.841472	1.19619	1.71118	29.5437	15.3521	37.8651	1.99313	24.5798	83.8592	1
688	MAL7P1.187	MAL7P1.187_v7.1_P2/8	erythrocyte membrane protein 1, PfEMP1	PF3D7_0733000	MAL7P1.187				Pf3D7_07_v3:1,417,588..1,426,234(-)	erythrocyte membrane protein 1, PfEMP1	2.79611e-06	0.000717693	0.0206979	0.88094	-1.02848	0.000245242	-2.14345	0.584071	-1.10834	0.167104	1.30049	0.841366	-1.03825	0.06386	-1.42832	0.433964	-1.17062	9.07676	7.85208	13.8349	1.70975	3.09881	1.91479	4.20179	1
213	MAL7P1.19	MAL7P1.19_v7.1_P8/11	ubiquitin transferase, putative	PF3D7_0704600	MAL7P1.19				Pf3D7_07_v3:216,024..229,072(-)	E3 ubiquitin-protein ligase	4.26892e-06	0.0586135	0.000288057	0.00907616	-1.30814	0.597859	-1.05304	0.628896	1.04848	0.270652	-1.11482	0.118393	-1.16824	0.0725701	-1.19705	0.0166306	-1.29875	8.70745	2.04892	3.82939	0.128726	6.35674	1.06841	1.14292	1
109	MAL7P1.201	MAL7P1.201_v7.1_P1/4	RNA helicase, putative	PF3D7_0705600	MAL7P1.201				Pf3D7_07_v3:281,035..284,433(-)	RNA helicase, putative	2.09503e-11	2.51825e-05	4.46115e-10	0.000466052	-2.05023	0.00687085	-1.70503	0.00063264	-2.00958	0.140707	-1.32266	0.599082	1.10339	0.142183	1.32125	0.00659016	-1.77478	23.9813	20.5889	23.7328	2.91079	23.2142	14.2359	4.17004	1
960	MAL7P1.202	MAL7P1.202_v7.1_P4/4	conserved Plasmodium protein, unknown function	PF3D7_0706000	MAL7P1.202				Pf3D7_07_v3:293,400..297,089(+)	importin-7, putative	2.01002e-07	0.0101629	0.0755107	0.319758	-1.12397	0.141438	1.19034	0.319936	1.12392	0.958798	1.00604	0.620066	-1.05962	0.621531	1.05936	0.747854	-1.04091	11.5837	3.87559	7.40857	0.354101	2.21432	0.529179	1.62507	1
2664	MAL7P1.203	MAL7P1.203_v7.1_P5/5	conserved Plasmodium protein, unknown function	PF3D7_0706100	MAL7P1.203				Pf3D7_07_v3:297,506..303,059(-)	conserved Plasmodium protein, unknown function	1.02721e-08	0.083997	7.65209e-07	0.208761	1.38341	0.896127	1.03388	0.11208	-1.51161	0.252337	-1.34307	0.485705	-1.19547	0.343273	1.27564	0.412787	-1.25174	14.9088	23.8911	3.16879	0.72542	12.28	14.056	7.78349	1
1521	MAL7P1.204	MAL7P1.204_v7.1_P3/5	conserved Plasmodium protein, unknown function	PF3D7_0706500	MAL7P1.204				Pf3D7_07_v3:309,902..315,022(-)	conserved Plasmodium protein, unknown function	5.52048e-08	6.78432e-06	0.00404839	0.385083	1.15941	0.0548597	1.39689	0.0678614	1.37304	0.325102	1.18275	0.0693798	1.37054	0.0334167	1.45159	0.116244	-1.33596	12.959	9.14557	28.2035	2.84345	4.26762	2.15128	3.42784	1
133	MAL7P1.207	MAL7P1.207_v7.1_P2/6	conserved Plasmodium protein, unknown function	PF3D7_0707200	MAL7P1.207				Pf3D7_07_v3:329,936..336,325(-)	conserved Plasmodium protein, unknown function	1.19612e-05	0.520246	1.61873e-08	0.0137406	2.55732	4.48708e-07	9.45876	0.765479	-1.11477	0.14901	-1.70489	0.135094	-1.73861	0.846109	-1.07322	0.762277	1.12501	7.8438	25.5774	0.422122	0.196639	17.3524	40.4169	15.8384	1
2531	MAL7P1.208	MAL7P1.208_v7.1_P1/3	rhoptry-associated membrane antigen	PF3D7_0707300	MAL7P1.208				Pf3D7_07_v3:338,885..342,083(+)	rhoptry-associated membrane antigen	7.66278e-13	0.00650397	3.49028e-14	0.0515239	2.3794	0.00720647	3.41475	0.0690243	2.24011	0.00143973	-4.43659	5.28024e-06	-10.1458	0.0904985	-2.11355	0.496354	-1.37129	30.3505	139.858	8.40739	5.53457	46.063	151.616	22.3821	1
1553	MAL7P1.21	MAL7P1.21_v7.1_P2/3	origin recognition complex subunit 2, putative	PF3D7_0705300	MAL7P1.21				Pf3D7_07_v3:261,977..264,454(+)	origin recognition complex subunit 2, putative	1.01788e-06	0.000636775	9.61265e-05	0.815724	1.1014	0.922398	1.04118	0.137476	-1.86927	0.0359066	-2.4557	0.0426498	-2.37772	0.681898	-1.18532	0.719833	-1.17234	9.99506	42.2194	14.1532	8.54052	7.31158	22.0602	20.5167	1
471	MAL7P1.212	MAL7P1.212_v7.1_P5/7	erythrocyte membrane protein 1, PfEMP1	PF3D7_0833500	MAL7P1.212				Pf3D7_08_v3:1,435,794..1,443,449(-)	erythrocyte membrane protein 1, PfEMP1	0.00353364	0.000597071	1.53675e-07	1.49689e-06	-3.04344	6.52575e-09	-4.33734	0.677854	-1.0835	0.208119	1.27837	0.669656	1.08585	0.531135	1.12874	0.0867804	-1.43456	3.84057	3.51387	14.3256	1.87243	14.2556	9.31643	4.44397	1
1541	MAL7P1.214	MAL7P1.214_v7.1_P1/2NU	VAR pseudogene fragment, erythrocyte membrane protein 1 (PfEMP1) pseudogene fragment	PF3D7_0833300	MAL7P1.214				Pf3D7_08_v3:1,429,330..1,430,514(+)	erythrocyte membrane protein 1 (PfEMP1), exon 2, pseudogene	1.71147e-05	2.52629e-13	0.0137098	3.3888e-07	-5.41289	1.51459e-05	-3.85295	6.82223e-05	-3.36429	9.96185e-06	-4.00018	4.98632e-06	-4.25532	3.11045e-05	-3.61184	3.94866e-05	-3.85701	7.55483	13.5033	133.582	34.1087	3.38693	4.32408	8.68151	1
177	MAL7P1.22	MAL7P1.22_v7.1_P4/5	conserved Plasmodium protein, unknown function	PF3D7_0707500	MAL7P1.22				Pf3D7_07_v3:348,277..353,082(+)	conserved Plasmodium protein, unknown function	2.31164e-10	0.0315165	3.32694e-11	0.691751	1.11491	0.0145586	2.01445	0.00681913	2.18945	0.40226	1.25951	0.635623	1.13889	0.00550733	-2.23978	0.201648	-1.46028	20.0724	37.094	5.03151	1.32833	28.2851	37.3365	8.97605	1
2300	MAL7P1.225-a	MAL7P1.225-A_v7.1_P1/3	Plasmodium exported protein (PHISTa-like), unknown function	?	?	?	?	?	?	?	2.05485e-11	7.01679e-06	5.55321e-13	0.779946	1.10476	0.196285	-1.59412	0.12049	1.75674	0.000244123	4.26267	2.48431e-05	5.61319	0.00167639	3.34493	0.0100072	2.80611	24.0151	75.0744	28.0842	12.5421	38.0231	84.9037	15.1841	1
3558	MAL7P1.227	MAL7P1.227_v7.1_P1/1	stevor	PF3D7_0832000	MAL7P1.227				Pf3D7_08_v3:1,383,349..1,384,377(-)	stevor	0.00475652	0.391029	0.00294767	0.659746	-1.58648	0.368	-2.58062	0.322711	2.83692	0.14481	4.71506	0.146684	4.68018	0.78734	1.32649	0.306687	3.16713	3.66017	98.7046	0.754876	2.90812	4.50444	86.7658	130.983	1
1869	MAL7P1.228	MAL7P1.228_v7.1_P1/2	heat shock protein 70, putative	PF3D7_0831700	MAL7P1.228				Pf3D7_08_v3:1,365,467..1,367,506(-)	heat shock protein 70	6.45244e-11	0.0781249	2.69143e-09	0.00109249	-2.30799	0.0878125	-1.5097	0.820453	-1.05507	0.0821374	1.52169	0.00818679	1.93134	0.708561	1.09236	0.000451177	-2.646	22.0817	30.2914	3.29953	0.646609	20.1277	19.7221	6.66297	1
1831	MAL7P1.229	MAL7P1.229_v7.1_P1/4	cytoadherence linked asexual protein	PF3D7_0831600	MAL7P1.229				Pf3D7_08_v3:1,358,314..1,363,618(+)	cytoadherence linked asexual protein 8	7.17368e-14	0.276247	4.39998e-15	0.00114348	3.35389	0.000872842	3.46687	0.00157765	3.2227	0.0178896	-2.33429	5.78617e-05	-4.77776	0.145451	-1.66125	0.778974	-1.10852	35.7311	103.564	1.2245	0.507019	52.9954	109.717	14.0781	1
850	MAL7P1.23	MAL7P1.23_v7.1_P1/4	RAP protein, putative	PF3D7_0707800	MAL7P1.23				Pf3D7_07_v3:362,005..365,779(+)	RAP protein, putative	2.83403e-14	1.61367e-05	6.95269e-10	0.903407	-1.02363	0.0303448	-1.53972	0.0162136	-1.62116	0.0311615	-1.53625	0.359354	-1.19417	0.382696	1.184	0.467976	1.16167	38.0535	34.6651	25.21	3.28074	22.4218	14.5895	4.42465	1
2461	MAL7P1.231	MAL7P1.231_v7.1_P1/1NU	histidine-rich protein II	PF3D7_0831800	MAL7P1.231				Pf3D7_08_v3:1,374,236..1,375,299(-)	histidine-rich protein II	0.602881	0.0569636	0.0218345	0.505948	-1.605	0.0138342	-6.21429	0.0590668	-3.95342	0.802431	1.19419	0.0868918	3.45808	0.218731	-2.41539	0.217723	-2.57246	0.787103	9.73672	3.88301	6.86202	3.06171	27.0531	60.0845	1
2156	MAL7P1.24	MAL7P1.24_v7.1_P1/1	large ribosomal subunit processing protein, putative	PF3D7_0707900	MAL7P1.24				Pf3D7_07_v3:366,929..367,708(+)	ribosomal protein S8e, putative	1.17088e-06	0.0679784	0.000174353	0.00219332	-2.04862	0.123146	-1.40798	0.0330329	-1.61755	0.826448	-1.04898	0.734596	1.07678	0.293396	-1.25982	0.000759003	-2.3536	9.86466	11.5402	3.55382	0.593919	6.78659	5.67092	5.68212	1
1005	MAL7P1.25	MAL7P1.25_v7.1_P3/3	cytoskeleton associated protein, putative	PF3D7_0708000	MAL7P1.25				Pf3D7_07_v3:368,707..371,672(+)	cytoskeleton associated protein, putative	1.04055e-14	0.188954	5.65836e-13	0.726189	-1.07258	0.00278017	-1.89652	0.651891	1.09452	0.0687271	1.45212	0.000890968	2.06009	0.00133105	2.00166	0.110713	1.4154	40.705	40.0336	1.79709	0.252492	37.973	26.6761	4.77702	1
2136	MAL7P1.26	MAL7P1.26_v7.1_P1/1	O-sialoglycoprotein endopeptidase, putative	PF3D7_0708300	MAL7P1.26				Pf3D7_07_v3:378,031..379,305(+)	EKC/KEOPS complex subunit BUD32	3.89374e-14	2.26437e-15	4.87975e-11	0.289924	1.20093	0.00098975	1.84762	8.81092e-06	2.43425	1.76155e-05	2.34001	4.67914e-09	3.76439	2.28018e-06	2.6287	0.248341	1.23845	37.2448	26.9848	186.781	19.3325	27.4876	14.2253	3.51912	1
3574	MAL7P1.27	MAL7P1.27_v7.1_P2/2	chloroquine resistance transporter	PF3D7_0709000	MAL7P1.27				Pf3D7_07_v3:403,222..406,317(+)	chloroquine resistance transporter	2.47655e-08	0.000671967	3.41316e-06	0.949282	1.01774	0.23969	1.38868	0.0894752	1.61548	0.0880348	1.61914	0.0099677	2.1148	0.39391	-1.26734	0.171615	-1.50624	13.8648	26.0694	14.0098	3.76313	10.5961	14.231	9.13265	1
64	MAL7P1.28	MAL7P1.28_v7.1_P2/4	rRNA/tRNA ribonuclease MRP/P subunit, putative	PF3D7_0709600	MAL7P1.28				Pf3D7_07_v3:429,857..433,758(-)	ribonucleases P/MRP protein subunit POP1, putative	2.4412e-14	6.214e-06	9.84092e-08	0.00102624	-1.66569	0.233117	1.18824	0.14778	1.23421	0.471202	1.10907	0.00237039	1.59471	0.0212042	1.40955	0.000461951	-1.80151	38.4385	19.3784	28.5158	2.05371	14.8373	5.34292	2.44868	1
3713	MAL7P1.29a	MAL7P1.29A_v7.1_P1/1	conserved Plasmodium protein, unknown function	PF3D7_0709800	MAL7P1.29a				Pf3D7_07_v3:437,900..438,094(+)	conserved protein, unknown function	2.35903e-06	0.0772522	2.57175e-08	0.525666	1.09106	0.00024764	1.74427	0.00549256	1.4964	0.571305	-1.0808	0.33419	-1.14242	0.723596	1.04966	0.582448	1.084	9.22759	4.25745	3.31991	0.218821	16.682	5.49772	2.241	1
627	MAL7P1.3	MAL7P1.3_v7.1_P1/1NU	Plasmodium exported protein (hyp5), unknown function	PF3D7_0701400	MAL7P1.3				Pf3D7_07_v3:65,718..66,854(-)	exported protein family 4, pseudogene	1.50974e-13	9.57798e-07	6.24278e-10	0.511957	1.2218	0.0983845	1.67137	0.0107262	2.26166	0.00452541	2.50673	0.000595055	3.14049	0.209147	-1.47247	0.556327	-1.21166	33.9596	77.4897	35.5744	11.5964	22.6123	36.8551	11.0831	1
287	MAL7P1.30	MAL7P1.30_v7.1_P5/10	conserved Plasmodium protein, unknown function	PF3D7_0710000	MAL7P1.30				Pf3D7_07_v3:447,515..458,496(-)	conserved Plasmodium protein, unknown function	5.8986e-12	0.241091	9.69954e-11	0.0814427	1.35937	0.331306	1.18355	0.0143717	1.55448	0.00105789	-1.84447	0.0892136	-1.34871	0.246136	1.22358	0.12598	1.33208	26.2768	19.1869	1.42348	0.148486	26.1013	13.6134	3.54661	1
1558	MAL7P1.300	MAL7P1.300_v7.1_P1/1	40S ribosomal protein S29, putative	PF3D7_0705700	MAL7P1.300				Pf3D7_07_v3:285,472..286,166(-)	40S ribosomal protein S29, putative	7.22622e-06	3.54942e-06	1.83555e-05	9.67097e-05	-2.73351	1.59205e-05	-3.14007	0.000891946	-2.29149	0.43911	-1.19513	0.0200682	-1.7428	0.707087	-1.09011	0.000958328	-2.41133	8.26007	10.6955	30.5469	5.65046	8.86449	8.19863	6.28921	1
3774	MAL7P1.31	MAL7P1.31_v7.1_P1/1	conserved Plasmodium membrane protein, unknown function	PF3D7_0710300	MAL7P1.31				Pf3D7_07_v3:472,501..473,541(-)	conserved Plasmodium membrane protein, unknown function	1.23598e-10	5.54716e-05	7.58953e-10	0.525592	1.16399	0.937529	1.01887	0.0700629	1.55712	0.00348256	2.10335	0.00114849	2.31796	0.00793311	1.95022	0.123563	1.49138	21.0395	29.4578	21.2091	4.24218	22.2677	22.2696	6.80056	1
3152	MAL7P1.320	MAL7P1.320_v7.1_P1/1	ribosomal protein, L37e, putative	PF3D7_0706400	MAL7P1.320				Pf3D7_07_v3:306,855..307,133(-)	60S ribosomal protein L37	0.000562038	3.13411e-08	0.00322018	5.34572e-06	-10.3532	8.4785e-06	-9.68437	0.000127563	-6.51446	0.535056	-1.31224	0.0147694	-3.04603	0.224862	-1.7092	3.77993e-07	-18.3451	5.01108	23.5326	50.7191	34.0261	4.4381	14.887	22.8097	1
3326	MAL7P1.33	MAL7P1.33_v7.1_P1/1	conserved Plasmodium protein, unknown function	PF3D7_0710500	MAL7P1.33				Pf3D7_07_v3:476,116..477,552(-)	conserved Plasmodium protein, unknown function	4.36274e-14	0.154464	9.05716e-14	0.652888	1.12726	0.165844	-1.4533	3.87802e-05	-3.48232	0.828137	1.05945	0.00638104	2.15422	0.0332131	1.79675	0.302093	1.3441	36.959	64.3322	2.12101	0.527415	43.1436	53.641	8.45453	1
3375	MAL7P1.34	MAL7P1.34_v7.1_P1/1	conserved Plasmodium membrane protein, unknown function	PF3D7_0711100	MAL7P1.34				Pf3D7_07_v3:492,519..493,232(-)	conserved Plasmodium membrane protein, unknown function	2.28881e-08	0.00728721	6.76546e-07	0.000268964	-2.8526	0.0277216	-1.80962	0.647979	1.12614	0.649172	1.12566	0.00416737	-2.20834	0.0721085	-1.61397	8.21948e-07	-5.25139	13.9562	23.1831	8.14971	1.93396	12.4252	14.7428	8.06835	1
3484	MAL7P1.340	MAL7P1.340_v7.1_P1/1	ATP synthase subunit C, putative	PF3D7_0705900	MAL7P1.340				Pf3D7_07_v3:290,100..291,220(-)	ATP synthase subunit C, putative	3.38857e-12	0.0679757	9.70389e-11	4.60712e-05	1.96816	0.761767	1.04532	0.878284	-1.02263	0.274317	-1.17488	0.103136	1.27498	0.000295784	1.79457	5.15607e-05	2.05022	27.3355	14.3639	3.55389	0.266779	26.1004	9.79635	2.55226	1
3437	MAL7P1.36	MAL7P1.36_v7.1_P1/1	conserved Plasmodium protein, unknown function	PF3D7_0711300	MAL7P1.36				Pf3D7_07_v3:499,336..499,695(+)	conserved Plasmodium protein, unknown function	8.71558e-07	6.88763e-07	0.000922404	0.152651	1.32766	0.0907527	1.40109	0.105236	1.38047	0.0310788	1.54613	0.00573367	1.77051	0.0175338	1.6221	0.528767	1.14088	10.1408	9.50555	36.9036	4.9417	5.40272	3.61734	4.55288	1
1023	MAL7P1.37	MAL7P1.37_v7.1_P1/3	sin3 associated polypeptide p18-like protein	PF3D7_0711400	MAL7P1.37				Pf3D7_07_v3:500,408..502,594(-)	histone deacetylase complex subunit SAP18, putative	2.83565e-08	0.926705	2.26323e-06	0.306536	-1.3129	0.170655	-1.44348	0.857446	1.04861	0.846398	1.05252	0.21015	1.39788	0.00388629	2.25373	0.775424	1.08396	13.7089	23.5461	0.00858893	0.00210746	11.0446	13.55	8.34255	1
1214	MAL7P1.38	MAL7P1.38_v7.1_P1/2	regulator of chromosome condensation, putative	PF3D7_0711500	MAL7P1.38				Pf3D7_07_v3:505,245..507,311(+)	regulator of chromosome condensation, putative	2.22826e-09	0.0320739	1.95531e-09	0.0324478	-1.41042	0.301805	-1.17548	0.564109	-1.09397	0.176687	1.23708	0.00875267	1.53568	0.00729707	1.5529	0.395958	1.15226	16.8529	10.0086	4.99652	0.423907	20.653	8.76106	2.88457	1
2860	MAL7P1.5	MAL7P1.5_v7.1_P1/1	Pfmc-2TM Maurer's cleft two transmembrane protein	PF3D7_0701600	MAL7P1.5				Pf3D7_07_v3:71,049..71,860(+)	Pfmc-2TM Maurer's cleft two transmembrane protein	4.42354e-14	4.32806e-08	2.83945e-12	0.00636172	4.16001	0.995236	-1.00295	0.00478099	4.39267	3.00104e-05	10.5805	3.1114e-05	10.5176	0.0317005	2.99885	0.00944037	4.22858	36.9243	221.581	49.1541	42.1388	33.8586	145.132	29.1475	1
1232	MAL7P1.50	MAL7P1.50_v7.1_P2/7	erythrocyte membrane protein 1, PfEMP1	PF3D7_0712300	MAL7P1.50				Pf3D7_07_v3:542,906..550,520(-)	erythrocyte membrane protein 1, PfEMP1	0.000161133	0.149366	0.00155286	0.00225805	-7.29914	0.0494043	-3.40896	0.566694	1.4165	0.527162	-1.46888	0.268085	-1.96912	0.26185	1.98706	0.000541357	-11.6742	5.86823	53.0832	2.17614	2.81216	4.9937	32.2659	43.937	1
1944	MAL7P1.55	MAL7P1.55_v7.1_P1/7	erythrocyte membrane protein 1, PfEMP1	PF3D7_0712800	MAL7P1.55				Pf3D7_07_v3:581,386..588,923(-)	erythrocyte membrane protein 1, PfEMP1	0.022847	0.252304	0.00031989	0.011091	-1.80514	0.000266744	-2.44556	0.0841254	1.47876	0.365731	1.2233	0.973911	-1.00727	0.458772	1.17911	0.394563	-1.22467	2.73937	3.30725	1.3562	0.233905	6.26843	5.40563	5.86403	1
92	MAL7P1.56	MAL7P1.56_v7.1_P4/7	erythrocyte membrane protein 1, PfEMP1	PF3D7_0712900	MAL7P1.56				Pf3D7_07_v3:590,326..597,733(-)	erythrocyte membrane protein 1, PfEMP1	3.66846e-05	6.90672e-07	6.65248e-09	1.77569e-06	-2.31878	1.88978e-08	-2.90282	0.393507	-1.13455	0.422622	1.12587	0.0959669	-1.28414	0.0685987	-1.31614	0.00516469	-1.59486	6.9584	3.70779	36.8924	2.8083	18.6917	7.11421	2.58813	1
2653	MAL7P1.58	MAL7P1.58_v7.1_P1/1	Pfmc-2TM Maurer's cleft two transmembrane protein	PF3D7_0713100	MAL7P1.58				Pf3D7_07_v3:605,653..606,440(+)	Pfmc-2TM Maurer's cleft two transmembrane protein	8.34192e-10	0.0246182	2.42064e-09	0.00179859	-5.65464	0.000264456	-8.02077	0.576575	-1.33428	0.432964	1.50064	0.379026	1.5776	0.511597	-1.40395	0.20239	-2.03558	18.197	118.908	5.53072	5.16294	20.3009	94.7548	31.7391	1
2393	MAL7P1.6	MAL7P1.6_v7.1_P1/1	Plasmodium exported protein (hyp12), unknown function	PF3D7_0702000	MAL7P1.6				Pf3D7_07_v3:84,797..85,674(+)	Plasmodium exported protein (hyp12), unknown function	4.76006e-13	0.0002498	3.44641e-13	0.0945208	-2.0717	0.407085	-1.42686	0.995076	-1.00264	0.463228	1.36913	0.00334852	-3.80431	1.3437e-07	-16.5359	0.00355373	-4.12961	31.3729	140.514	16.7304	10.7047	39.3178	125.784	21.7544	1
3162	MAL7P1.61	MAL7P1.61_v7.1_P2/2	erythrocyte membrane protein 1 (PfEMP1), pseudogene	PF3D7_0713300	MAL7P1.61				Pf3D7_07_v3:609,297..610,522(+)	erythrocyte membrane protein 1 (PfEMP1), pseudogene	5.81775e-06	6.6565e-07	4.47412e-05	1.41512e-05	-15.7885	8.92457e-05	-11.2564	0.0114626	-4.28971	0.0330413	-3.3552	0.17341	-2.13299	0.201449	-2.0333	2.44716e-07	-42.1187	8.44276	62.5836	37.0427	39.2266	8.01128	42.418	36.0045	1
162	MAL7P1.64	MAL7P1.64_v7.1_P1/2	serpentine receptor, putative	PF3D7_0713400	MAL7P1.64				Pf3D7_07_v3:612,458..613,740(+)	GPCR-like receptor SR25	9.83795e-06	6.87217e-08	0.0042272	0.0191626	1.48302	0.0227901	1.46549	0.00290654	1.6722	0.00144794	1.74276	0.168841	1.25266	0.203084	1.23116	0.273007	1.21029	8.00385	5.13279	46.964	4.30251	4.23563	1.94019	3.11484	1
962	MAL7P1.65	MAL7P1.65_v7.1_P2/3	conserved Plasmodium protein, unknown function	PF3D7_0713500	MAL7P1.65				Pf3D7_07_v3:614,385..617,249(+)	conserved Plasmodium protein, unknown function	0.0416297	1.77843e-05	0.840554	0.112763	1.36036	0.220472	1.26613	0.0766062	1.41232	0.0640079	1.43607	0.304126	1.21804	0.0777224	1.4104	0.010519	1.7285	2.39762	2.14002	24.8838	3.17291	0.406972	0.259463	4.33531	1
1583	MAL7P1.68	MAL7P1.68_v7.1_P1/4	zinc finger protein, putative	PF3D7_0714300	MAL7P1.68				Pf3D7_07_v3:656,871..661,669(+)	palmitoyltransferase DHHC4, putative	4.72054e-06	0.688878	0.108547	0.00065523	-1.81084	0.856582	1.02924	0.967498	1.00652	0.506433	-1.11213	0.217722	-1.21989	0.818761	1.03722	0.00105579	-1.83289	8.62096	5.39316	0.163066	0.0145731	1.96892	0.879807	3.03856	1
2647	MAL7P1.69	MAL7P1.69_v7.1_P1/1	calmodulin, putative	PF3D7_0714400	MAL7P1.69				Pf3D7_07_v3:662,284..663,407(-)	calmodulin, putative	0.00160889	0.495799	0.00196838	0.225148	-1.32924	0.857939	1.04243	0.429331	-1.20234	0.0142417	-1.81348	0.865538	1.04009	0.176537	1.37432	0.0723327	1.57897	4.32938	5.73885	0.474056	0.0897698	4.81094	4.55513	6.43843	1
825	MAL7P1.7	MAL7P1.7_v7.1_P2/2	Plasmodium exported protein (PHISTb), unknown function	PF3D7_0702100	MAL7P1.7				Pf3D7_07_v3:88,685..90,886(+)	Plasmodium exported protein (PHISTb), unknown function, pseudogene	2.11824e-15	0.313925	5.56252e-16	0.656295	1.16214	0.0117074	2.43933	0.00543043	2.70198	0.00524583	2.71414	0.00351871	-2.85682	3.53792e-05	-4.9143	0.455942	-1.30974	45.2516	126.597	1.0448	0.417566	60.8131	121.523	13.5884	1
3878	MAL7P1.74	MAL7P1.74_v7.1_P1/1	secreted ookinete protein, putative	PF3D7_0715400	MAL7P1.74				Pf3D7_07_v3:687,891..688,848(-)	secreted ookinete protein, putative	3.94436e-06	0.00297228	0.000139549	0.243931	-1.92081	0.159871	-2.20563	0.0253707	-3.62328	0.161927	-2.19685	0.549249	-1.39514	0.744082	1.19863	0.11029	-2.62463	8.77581	66.4204	10.2414	11.0732	6.98095	37.7399	36.7617	1
3494	MAL7P1.75	MAL7P1.75_v7.1_P1/1	mitochondrial ATP synthase F1, epsilon subunit, putative	PF3D7_0715500	MAL7P1.75				Pf3D7_07_v3:689,543..690,057(-)	ATP synthase subunit epsilon, mitochondrial, putative	8.72113e-10	1.5536e-05	1.56057e-07	0.884683	-1.0665	0.000745623	-5.11787	0.00686351	-3.55428	0.0450188	-2.50157	0.199967	-1.77865	0.609492	1.25501	0.752474	-1.16154	18.1345	87.9178	25.3377	17.5486	14.2358	49.2977	23.5479	1
2013	MAL7P1.76	MAL7P1.76_v7.1_P1/3	conserved Plasmodium protein, unknown function	PF3D7_0716200	MAL7P1.76				Pf3D7_07_v3:712,469..714,967(+)	PDCD2 domain-containing protein, putative	1.02743e-11	0.744761	9.44595e-07	0.0157315	-1.74043	0.477676	-1.16939	0.72504	1.08036	0.891878	1.0303	0.633812	-1.11045	0.0244717	-1.67052	0.000285897	-2.56541	25.2508	29.9594	0.107725	0.0182591	12.034	10.1986	5.76287	1
247	MAL7P1.77	MAL7P1.77_v7.1_P1/2	conserved Plasmodium protein, unknown function	PF3D7_0716300	MAL7P1.77				Pf3D7_07_v3:717,281..718,968(+)	conserved Plasmodium protein, unknown function	5.81552e-15	4.66554e-09	1.08831e-11	0.243841	1.31475	0.000356878	-2.49696	8.43704e-07	-3.99861	0.175883	-1.37567	0.0283733	-1.69601	0.475746	-1.18103	0.142545	-1.44813	42.3178	56.2664	60.5908	11.5089	30.7164	29.1722	6.45813	1
3682	MAL7P1.78	MAL7P1.78_v7.1_P1/1	conserved Plasmodium protein, unknown function	PF3D7_0716400	MAL7P1.78				Pf3D7_07_v3:720,010..721,467(+)	transcription initiation factor IIA subunit 1, putative	3.08616e-08	0.162284	9.73038e-09	0.322195	-1.2197	0.560939	-1.1231	0.0849712	1.42017	0.00374885	-1.85025	0.329836	-1.21586	0.193877	1.29957	0.0260158	1.63552	13.612	13.2883	2.04048	0.284567	18.1105	12.6285	4.74166	1
2535	MAL7P1.79	MAL7P1.79_v7.1_P2/2	conserved Plasmodium protein, unknown function	PF3D7_0716500	MAL7P1.79				Pf3D7_07_v3:721,717..724,715(+)	conserved Plasmodium protein, unknown function	3.18818e-13	0.00187095	1.55061e-10	0.236943	1.29888	0.512675	-1.15455	0.000410321	-2.34167	0.283206	-1.26725	0.689005	1.09163	0.232215	1.30241	0.290283	1.28332	32.2561	38.0117	11.3741	1.91481	25.1861	21.2001	5.72383	1
3203	MAL7P1.81	MAL7P1.81_v7.1_P1/1	eukaryotic translation initiation factor 3 37.28 kDa subunit, putative	PF3D7_0716800	MAL7P1.81				Pf3D7_07_v3:732,070..733,496(-)	eukaryotic translation initiation factor 3 subunit I, putative	4.54365e-11	2.15509e-10	7.20613e-07	0.194591	-1.2462	0.0212392	1.49448	0.018521	1.50905	0.0212705	1.49432	0.000253621	1.97287	8.14938e-06	2.39451	0.280993	1.21507	22.6606	15.6595	79.076	7.80644	12.3507	6.09633	3.35651	1
3378	MAL7P1.82	MAL7P1.82_v7.1_P1/1	conserved Plasmodium membrane protein, unknown function	PF3D7_0717000	MAL7P1.82				Pf3D7_07_v3:738,578..741,209(+)	conserved Plasmodium membrane protein, unknown function	1.28324e-08	0.0593969	8.04026e-08	0.235167	1.64896	0.175455	1.77294	0.661781	1.20037	0.0208966	-2.72503	0.0561235	-2.26688	0.893349	-1.05749	0.713341	1.17809	14.6397	62.6202	3.80452	2.32479	15.1061	46.1535	20.776	1
463	MAL7P1.83	MAL7P1.83_v7.1_P2/3	conserved Plasmodium protein, unknown function	PF3D7_0717100	MAL7P1.83				Pf3D7_07_v3:742,010..744,901(+)	conserved Plasmodium protein, unknown function	1.15739e-14	0.474507	8.52077e-12	0.000370149	1.90743	0.12369	-1.29416	0.109505	-1.30794	0.478612	-1.12415	0.116315	1.30113	0.0149057	1.5204	0.000162386	2.09644	40.416	26.9344	0.523008	0.0497925	31.2704	14.8854	3.23694	1
2450	MAL7P1.84	MAL7P1.84_v7.1_P1/2	conserved Plasmodium protein, unknown function	PF3D7_0717200	MAL7P1.84				Pf3D7_07_v3:745,191..746,663(-)	conserved Plasmodium protein, unknown function	3.21228e-11	0.000102784	1.73457e-09	0.00204033	1.53532	0.66982	-1.05676	0.634835	-1.06344	0.176422	-1.19385	0.00056034	-1.63012	0.00173027	-1.54734	0.630424	1.06888	23.2448	9.56318	19.3223	1.13563	20.8525	6.12784	1.99829	1
1567	MAL7P1.87	MAL7P1.87_v7.1_P3/3	conserved Plasmodium protein, unknown function	PF3D7_0717600	MAL7P1.87				Pf3D7_07_v3:758,720..762,877(-)	conserved Plasmodium protein, unknown function	7.85102e-07	0.00126183	1.54273e-06	0.289943	1.58964	0.558494	1.29017	0.92741	1.04037	0.00915561	-3.29267	0.00434561	-3.73455	0.346074	-1.5098	0.412656	-1.46566	10.2396	47.545	12.3667	8.20306	11.4725	38.0497	22.5529	1
1821	MAL7P1.88	MAL7P1.88_v7.1_P1/2	thioredoxin-like protein	PF3D7_0717900	MAL7P1.88				Pf3D7_07_v3:772,951..775,264(-)	thioredoxin-like protein	6.69077e-13	1.30875e-06	1.47051e-12	8.04594e-07	-2.78378	3.25287e-05	-2.25577	0.00168836	-1.78554	0.409459	-1.15254	0.594893	1.09555	0.891536	-1.02363	0.00187047	-1.84578	30.6389	22.113	34.34	3.54061	35.4901	18.2959	3.50555	1
2068	MAL7P1.93	MAL7P1.93_v7.1_P1/1	mitochondrial ribosomal protein S8 precursor, putative	PF3D7_0718400	MAL7P1.93				Pf3D7_07_v3:822,438..823,015(+)	mitochondrial ribosomal protein S8 precursor, putative	2.4764e-06	0.0594877	0.00213095	0.316049	1.28107	0.515449	-1.17349	0.529581	-1.16719	0.450107	1.2044	0.764975	1.07611	0.18384	-1.39127	0.516903	-1.18581	9.18436	13.5911	3.80166	0.803677	4.75024	5.02105	7.18766	1
3538	MAL7P1.94	MAL7P1.94_v7.1_P1/1	prefoldin subunit 3, putative	PF3D7_0718500	MAL7P1.94				Pf3D7_07_v3:824,445..825,884(+)	prefoldin subunit 3, putative	9.58307e-10	0.822902	1.99297e-06	0.126264	-1.17003	0.334053	1.10314	0.554286	1.06166	0.509156	-1.06912	0.898088	1.01301	0.160109	1.15473	0.0442131	-1.25079	18.0025	4.51237	0.0508727	0.00182162	11.1855	2.00262	1.21745	1
3295	MAL7P1.97	MAL7P1.97_v7.1_P1/1	conserved Plasmodium protein, unknown function	PF3D7_0718900	MAL7P1.97				Pf3D7_07_v3:835,957..836,861(+)	conserved Plasmodium protein, unknown function	0.309031	0.0678588	0.985332	0.13258	-5.37344	0.388584	-2.59349	0.888153	-1.16721	0.156107	-4.86784	0.349536	-2.81524	0.899434	1.14905	0.721095	1.52182	1.23962	36.8642	3.55707	15.1116	0.126784	2.69309	144.443	1
495	MAL7P1.99	MAL7P1.99_v7.1_P1/1	conserved Plasmodium protein, unknown function	PF3D7_0719100	MAL7P1.99				Pf3D7_07_v3:838,990..840,024(-)	conserved Plasmodium protein, unknown function	9.56633e-10	0.250285	3.36445e-08	0.000154046	4.00713	0.00432344	2.71029	0.319544	-1.3901	0.49922	-1.24945	0.264335	1.44782	0.224139	1.49737	0.017919	2.38014	18.005	47.8092	1.36803	0.518939	16.3011	30.9178	12.8973	1
866	MAL8a_5.8s	MAL8A_5.8S_v7.1_P1/1NU	product unspecified	?	?	?	?	?	?	?	0.749798	0.477456	0.668064	0.852076	-1.11411	0.857544	-1.10962	0.867195	1.10175	0.781504	1.17443	0.432592	-1.57893	0.963146	-1.02713	0.377489	-1.73288	0.602105	4.97396	0.51601	0.608961	0.643641	3.79792	40.1246	1
3211	MAL8a_5.8S:rRNA	MAL8a_5.8S_p	ncRNA	PF3D7_0830000	MAL8a_5.8S:rRNA, MAL8a_5.8s	MAL8a_5.8s			Pf3D7_08_v3:1,280,004..1,280,114(+)	5.8S ribosomal RNA	0.309699	0.301131	0.552253	0.57048	1.35922	0.718218	-1.21521	0.793001	1.15222	0.89821	1.07148	0.497113	-1.44443	0.801421	-1.14544	0.271966	-1.89555	1.23828	8.87577	1.10247	1.1289	0.807743	4.13554	34.8151	1
2218	MAL8b_28s	MAL8B_28S_v7.1_P5/6	product unspecified	PF3D7_0801100	MAL8b_28s				Pf3D7_08_v3:91,397..97,571(-)	28S ribosomal RNA	4.80127e-11	0.000165783	1.38772e-08	0.0207485	2.12525	0.228743	1.4637	0.394702	-1.30727	0.0601141	1.83029	4.32488e-05	4.29565	0.000155688	3.75124	0.0137492	2.37122	22.5688	54.4585	17.909	6.17347	17.5794	30.2994	11.7203	1
3328	MAL8P1.10	MAL8P1.10_v7.1_P1/1	conserved protein, unknown function	PF3D7_0829100	MAL8P1.10				Pf3D7_08_v3:1,252,349..1,253,796(+)	conserved protein, unknown function	0.3411	0.00938259	0.450769	0.00875827	-8.60117	0.154948	-3.0811	0.804933	-1.21234	0.13433	-3.27578	0.167706	-2.97593	0.831371	-1.18058	0.0556337	-5.14986	1.17791	17.6066	7.58485	16.1962	0.968565	10.341	72.6013	1
1061	MAL8P1.101	MAL8P1.101_v7.1_P3/4	RNA binding protein, putative	PF3D7_0811900	MAL8P1.101				Pf3D7_08_v3:596,190..600,328(+)	RNA-binding protein, putative	1.10926e-13	2.76625e-05	3.54418e-10	0.0449836	1.55522	0.599367	1.11908	0.0187841	-1.68804	0.0142529	-1.72998	0.0539053	-1.5275	0.722234	-1.07901	0.652849	-1.10841	34.6841	38.9925	23.4262	3.76231	23.6332	18.9778	5.46049	1
2662	MAL8P1.102	MAL8P1.102_v7.1_P1/2	conserved Plasmodium protein, unknown function	PF3D7_0811800	MAL8P1.102				Pf3D7_08_v3:593,649..595,412(-)	conserved Plasmodium protein, unknown function	2.3642e-13	0.679407	4.60703e-13	0.00838612	-1.57317	0.00621868	-1.60354	0.276969	-1.19585	0.813097	1.03932	0.00276693	1.68605	6.76135e-05	2.08471	0.000277724	2.0167	32.9285	21.5509	0.173765	0.0162464	38.5258	18.0101	3.17888	1
2986	MAL8P1.103	MAL8P1.103_v7.1_P1/2	conserved Plasmodium protein, unknown function	PF3D7_0811400	MAL8P1.103				Pf3D7_08_v3:575,986..578,370(+)	conserved protein, unknown function	8.5555e-09	0.00204876	8.97398e-10	2.77344e-05	-1.68813	5.43821e-06	-1.79074	0.010225	-1.34212	0.826688	-1.02416	0.638507	-1.05263	0.22208	1.14406	0.00407838	-1.42805	15.1324	4.42514	11.1491	0.465758	21.9753	4.59014	1.42036	1
703	MAL8P1.104	MAL8P1.104_v7.1_P5/5	CAF1 family ribonuclease, putative	PF3D7_0811300	MAL8P1.104				Pf3D7_08_v3:567,824..573,148(+)	CCR4-associated factor 1	1.08617e-09	8.27744e-07	3.24305e-07	0.251335	1.17682	0.00107204	1.64684	0.00030656	1.75195	0.240091	1.18154	0.310399	1.1545	0.673276	1.06114	0.703495	1.05892	17.8283	8.66741	36.1595	2.51133	13.3138	4.62331	2.36135	1
1244	MAL8P1.105	MAL8P1.105_v7.1_P2/4	conserved protein, unknown function	PF3D7_0811200	MAL8P1.105				Pf3D7_08_v3:560,744..564,276(+)	ER membrane protein complex subunit 1, putative	5.2885e-08	0.871901	2.36332e-08	0.0121818	-1.46495	0.0119309	-1.46675	0.907156	-1.01709	0.61721	-1.07544	0.849409	1.02797	0.091427	1.28461	0.295862	1.1778	13.0064	6.75336	0.0263951	0.00195789	16.8031	6.23193	2.52198	1
1733	MAL8P1.106-a	MAL8P1.106-A_v7.1_P1/1	conserved Plasmodium protein, unknown function	?	?	?	?	?	?	?	1.25866e-09	4.45278e-06	3.70291e-10	0.620448	1.20136	0.0999758	1.86027	0.0894739	-1.89963	0.0327443	-2.26392	0.000127731	-4.88526	0.00345802	-3.16988	0.0989103	-1.94596	17.6249	59.3109	29.7162	14.2858	23.553	56.6144	16.3451	1
3276	MAL8P1.107	MAL8P1.107_v7.1_P1/1	conserved Plasmodium protein, unknown function	PF3D7_0810700	MAL8P1.107				Pf3D7_08_v3:546,163..547,365(-)	conserved Plasmodium protein, unknown function	1.78808e-15	0.000157584	1.04756e-17	5.59043e-06	-2.5288	1.75367e-08	-3.53857	0.114778	-1.32228	0.651207	-1.0819	0.15845	1.28259	0.00351682	1.71836	0.801644	1.04783	45.7611	34.0468	18.0569	1.91922	78.774	41.8634	3.61377	1
3582	MAL8P1.108	MAL8P1.108_v7.1_P1/1	protein phosphatase, putative	PF3D7_0810500	MAL8P1.108				Pf3D7_08_v3:534,469..536,619(-)	protein phosphatase PPM7, putative	0.162163	0.0359744	0.660454	0.00279402	-13.9625	0.101804	-3.95654	0.659397	1.43859	0.0419753	-5.63259	0.555549	-1.6273	0.482532	1.78731	0.0218028	-8.18346	1.62398	27.1322	4.76887	11.3821	0.654057	7.80533	81.1494	1
2676	MAL8P1.109	MAL8P1.109_v7.1_P2/2	protein phosphatase, putative	PF3D7_0810300	MAL8P1.109				Pf3D7_08_v3:525,058..527,604(-)	protein phosphatase PPM5, putative	6.29028e-12	0.0459406	8.74403e-14	0.0489776	1.79695	0.000498959	3.01799	0.199505	1.4558	0.164337	-1.50374	0.000276763	-3.2021	0.00372976	-2.44464	0.0965465	-1.6895	26.1563	53.8213	4.29228	1.26173	43.2485	63.5654	9.99445	1
70	MAL8P1.11	MAL8P1.11_v7.1_P6/6	conserved Plasmodium membrane protein, unknown function	PF3D7_0829000	MAL8P1.11				Pf3D7_08_v3:1,245,211..1,251,078(+)	conserved Plasmodium membrane protein, unknown function	0.624253	7.50574e-08	0.00958662	8.22634e-05	1.54712	5.94233e-05	1.56389	0.00071121	1.43809	0.6741	1.04227	0.447234	1.07793	0.00115218	1.41399	1.29144e-05	1.7017	0.759813	0.180749	46.5531	1.58205	3.64069	0.618621	1.15545	1
2489	MAL8P1.110	MAL8P1.110_v7.1_P1/1	apicoplast ribosomal protein L33 precursor, putative	PF3D7_0810100	MAL8P1.110				Pf3D7_08_v3:519,331..519,991(-)	apicoplast ribosomal protein L33 precursor, putative	4.78404e-09	1.71843e-05	5.29411e-07	0.699412	1.12497	0.465842	-1.24988	0.00172627	-2.79792	0.0308876	-1.97598	0.0885465	-1.69937	0.960229	1.01531	0.157709	-1.59529	15.8594	36.2268	24.9987	8.15764	12.7174	20.7498	11.0949	1
2571	MAL8P1.111	MAL8P1.111_v7.1_P4/4	JmjC domain containing protein	PF3D7_0809900	MAL8P1.111				Pf3D7_08_v3:508,224..512,428(-)	JmjC domain-containing protein, putative	8.90809e-11	1.45556e-12	2.0311e-12	0.27067	1.12133	4.22089e-08	2.05005	8.05943e-08	2.00428	0.69053	-1.04192	0.0342413	1.25308	0.000208165	1.52921	0.0045862	1.39352	21.5597	5.63166	117.294	4.37695	34.6814	6.47089	1.26875	1
1347	MAL8P1.113	MAL8P1.113_v7.1_P2/17	peptidase family C50, putative	PF3D7_0809600	MAL8P1.113				Pf3D7_08_v3:479,980..497,382(-)	peptidase family C50, putative	5.05701e-13	0.0971973	6.4413e-12	0.596331	1.14965	0.405349	-1.24577	0.000943676	-2.57166	0.289185	-1.32422	0.227657	1.37773	0.0137703	1.969	0.0479491	1.77198	31.2414	53.0783	2.90919	0.706091	31.9136	38.7289	8.25215	1
2284	MAL8P1.114	MAL8P1.114_v7.1_P1/1	conserved Plasmodium protein, unknown function	PF3D7_0809500	MAL8P1.114				Pf3D7_08_v3:478,512..478,826(-)	histone acetyltransferase subunit NuA4, putative	7.11982e-12	2.54696e-08	0.000265531	0.878836	-1.0195	0.0259934	1.3401	0.0170478	1.3709	0.364859	1.12242	0.0573861	1.28062	0.00188509	1.52766	0.559883	1.08237	25.9252	10.2386	51.7408	2.91912	6.42567	1.81262	1.91822	1
3234	MAL8P1.121	MAL8P1.121_v7.1_P1/1	coatomer epsilon subunit, putative	PF3D7_0808400	MAL8P1.121				Pf3D7_08_v3:423,527..424,536(+)	coatomer subunit epsilon, putative	0.0137528	0.0781605	0.00140238	0.157638	1.23512	0.665998	1.06571	0.0144415	1.45757	0.522304	1.09909	0.457398	1.11612	0.598153	-1.08086	0.894949	1.021	3.03211	1.61754	3.29871	0.251394	5.07291	1.93303	2.59114	1
3840	MAL8P1.122	MAL8P1.122_v7.1_P1/1	ubiquitin regulatory protein, putative	PF3D7_0808300	MAL8P1.122				Pf3D7_08_v3:421,493..422,640(+)	ubiquitin regulatory protein, putative	8.35616e-10	0.750043	1.76595e-12	0.499188	-1.11268	0.0898553	1.31378	0.00285742	1.65293	0.173122	1.24297	0.496523	-1.11343	0.000123864	-1.96823	0.0282752	-1.46648	18.1946	11.1035	0.103154	0.00899304	35.0298	15.2697	2.96415	1
2347	MAL8P1.124	MAL8P1.124_v7.1_P2/4	conserved Plasmodium protein, unknown function	PF3D7_0808000	MAL8P1.124				Pf3D7_08_v3:404,996..409,084(+)	conserved Plasmodium protein, unknown function	3.02415e-19	3.87481e-05	3.2363e-18	0.092964	1.25427	1.00357e-06	-2.18079	3.08868e-05	-1.87668	0.70094	1.05207	0.00462279	1.48798	0.359892	1.12935	0.176002	1.21365	80.001	34.3247	22.3405	1.36932	84.9398	26.0312	2.08397	1
2745	MAL8P1.125	MAL8P1.125_v7.1_P2/2	tyrosyl-tRNA synthetase, putative	PF3D7_0807900	MAL8P1.125				Pf3D7_08_v3:402,595..404,141(+)	tyrosine--tRNA ligase	0.000216246	0.253046	0.00330533	0.0170637	-1.61282	0.105331	-1.37309	0.595217	-1.10761	0.760348	-1.06034	0.448083	-1.15749	0.560958	1.11839	0.0796783	-1.44489	5.66145	5.1346	1.35188	0.175153	4.41857	2.86242	4.40514	1
1760	MAL8P1.126	MAL8P1.126_v7.1_P2/3	serine protease, putative	PF3D7_0807700	MAL8P1.126				Pf3D7_08_v3:395,648..398,787(-)	serine protease DegP	1.99872e-12	0.00844936	4.04843e-12	0.0026616	1.74259	0.00048513	1.93676	1.5644e-05	2.36786	0.56802	1.10383	0.00365616	-1.7072	0.260052	1.21681	0.0116885	1.62924	28.3762	20.8027	7.81767	0.818738	33.0049	17.2828	3.56079	1
1412	MAL8P1.127	MAL8P1.127_v7.1_P1/4	conserved Plasmodium protein, unknown function	PF3D7_0807600	MAL8P1.127				Pf3D7_08_v3:389,596..394,259(-)	conserved Plasmodium protein, unknown function	0.000182691	0.00024463	0.125065	0.41325	-1.14186	0.298117	1.18438	0.478187	1.1217	0.458182	1.12769	0.343416	1.16634	0.00272198	1.6783	0.341939	1.1794	5.77959	3.70208	16.7898	1.53637	1.87296	0.85694	3.11122	1
2610	MAL8P1.13	MAL8P1.13_v7.1_P2/2	folate/biopterin transporter, putative	PF3D7_0828600	MAL8P1.13				Pf3D7_08_v3:1,229,899..1,232,132(-)	folate transporter 1	5.26734e-13	0.0468377	9.36565e-14	0.00514959	3.43436	0.00375866	3.60992	0.00374044	3.61268	0.00176975	-4.05473	8.87161e-05	-6.26057	0.231816	-1.6525	0.81581	-1.10909	31.1531	132.446	4.25509	2.58434	43.044	130.714	20.65	1
2743	MAL8P1.130	MAL8P1.130_v7.1_P2/2	conserved Plasmodium membrane protein, unknown function	PF3D7_0807200	MAL8P1.130				Pf3D7_08_v3:378,024..379,446(+)	conserved Plasmodium membrane protein, unknown function	2.40699e-07	3.1533e-05	1.51841e-05	0.717365	-1.10642	0.617983	1.14964	0.00901714	2.15428	0.168269	1.47705	0.00745062	2.20012	0.0704931	1.67761	0.804867	1.07654	11.3999	21.8563	23.0016	6.29996	9.05165	12.3959	9.31233	1
3414	MAL8P1.131	MAL8P1.131_v7.1_P1/1	gas41 homologue, putative	PF3D7_0807000	MAL8P1.131				Pf3D7_08_v3:370,784..372,623(+)	YEATS domain-containing protein, putative	1.00229e-07	0.0692264	3.12489e-08	0.0432527	-1.56692	0.278515	-1.26561	0.472984	1.16792	0.0787586	1.47354	0.0274137	1.63718	0.186687	1.33409	0.292427	1.27702	12.3116	14.0683	3.52033	0.574662	16.4053	13.3901	5.5502	1
760	MAL8P1.132	MAL8P1.132_v7.1_P2/3	kinesin-like protein, putative	PF3D7_0806600	MAL8P1.132				Pf3D7_08_v3:349,317..353,362(-)	kinesin-like protein, putative	3.03661e-15	0.000678932	7.99199e-11	0.00104903	-1.91678	0.652786	1.08591	0.000795951	1.95159	0.708482	-1.07086	0.473719	-1.14059	0.0567391	1.43065	0.0840165	-1.41271	44.1854	36.3827	13.9823	1.64474	26.4864	15.578	3.99942	1
3335	MAL8P1.133	MAL8P1.133_v7.1_P1/1	glycosyltransferase family 28 protein, putative	PF3D7_0806400	MAL8P1.133				Pf3D7_08_v3:344,288..344,821(+)	glycosyltransferase family 28 protein, putative	6.87717e-10	0.000783906	5.44284e-09	0.234194	1.56869	0.226578	1.58063	0.629305	-1.19852	0.000163511	-4.83064	0.0428063	-2.18658	0.712324	-1.14824	0.878239	-1.06327	18.4703	63.7542	13.6017	6.70702	19.0037	46.8539	16.7655	1
1804	MAL8P1.135	MAL8P1.135_v7.1_P1/3	conserved Plasmodium membrane protein, unknown function	PF3D7_0806200	MAL8P1.135				Pf3D7_08_v3:333,379..337,727(+)	Dpy-19-like C-mannosyltransferase, putative	1.84998e-12	0.369949	1.55569e-13	0.000371116	4.04058	4.24825e-05	5.2538	0.00244143	3.17937	0.00763208	-2.7241	0.035625	-2.16646	0.965022	-1.01573	0.151408	1.74073	28.5314	88.9512	0.825584	0.367699	41.5587	92.5472	15.1429	1
2799	MAL8P1.136	MAL8P1.136_v7.1_P1/1	conserved Plasmodium protein, unknown function	PF3D7_0805900	MAL8P1.136				Pf3D7_08_v3:324,279..325,655(-)	conserved protein, unknown function	0.140292	0.0912237	0.937319	0.022544	-4.89121	0.453929	-1.65402	0.948382	1.04427	0.376666	-1.81307	0.214542	-2.3167	0.524377	1.53308	0.00100571	-12.8771	1.70762	18.8184	3.02138	4.75661	0.249195	1.96155	53.5267	1
2367	MAL8P1.138	MAL8P1.138_v7.1_P1/1	alpha/beta hydrolase, putative	PF3D7_0805000	MAL8P1.138				Pf3D7_08_v3:283,066..284,522(-)	alpha/beta hydrolase, putative	3.22034e-09	0.486139	2.33192e-08	0.00608942	3.65308	0.022511	2.88257	0.775643	1.13568	0.0788898	-2.2307	0.868946	-1.07641	0.153145	1.91005	0.00871519	3.73568	16.3685	80.1875	0.495817	0.346993	16.8223	58.8647	23.7946	1
880	MAL8P1.139	MAL8P1.139_v7.1_P2/17	conserved Plasmodium membrane protein, unknown function	PF3D7_0804500	MAL8P1.139				Pf3D7_08_v3:250,083..268,437(+)	conserved Plasmodium membrane protein, unknown function	4.06678e-12	0.262459	5.81531e-07	0.0331109	1.26272	0.514382	-1.07165	0.432796	1.08695	0.433168	-1.08687	0.431573	-1.08719	0.018282	1.29743	0.00127418	1.48355	26.9833	7.4339	1.29846	0.0511037	12.605	2.48049	1.33814	1
3497	MAL8P1.14	MAL8P1.14_v7.1_P1/2	mitochondrial inner membrane protein, putative	PF3D7_0828400	MAL8P1.14				Pf3D7_08_v3:1,224,094..1,225,863(-)	mitochondrial inner membrane protein OXA1, putative	3.14728e-08	0.700096	8.51687e-06	0.237429	1.59858	0.883611	1.05922	0.577784	-1.24512	0.84502	-1.07986	0.247905	1.58184	0.0758131	2.04294	0.0645724	2.21792	13.5896	51.646	0.150903	0.0819278	9.63459	26.1538	18.4591	1
1480	MAL8P1.140	MAL8P1.140_v7.1_P3/3	methionine aminopeptidase 1c, putative	PF3D7_0804400	MAL8P1.140				Pf3D7_08_v3:245,711..247,933(+)	methionine aminopeptidase 1c, putative	2.88009e-16	2.63704e-07	1.05437e-13	0.00399919	1.86326	0.810171	1.05	6.61759e-06	-2.92132	0.00109512	-2.05261	0.0286344	-1.58512	0.728125	-1.0732	0.220578	1.30851	51.5853	52.3377	40.9267	5.93193	42.6933	30.9399	4.92798	1
1269	MAL8P1.141	MAL8P1.141_v7.1_P3/3	conserved Plasmodium protein, unknown function	PF3D7_0804300	MAL8P1.141				Pf3D7_08_v3:242,103..244,775(+)	zinc finger protein, putative	1.62296e-11	0.000616363	7.64973e-06	0.463842	-1.17108	0.146899	1.37222	0.233418	1.29512	0.224557	1.30171	0.237752	1.29197	0.787567	1.0596	0.0207455	-1.73798	24.4302	27.7246	14.2404	2.30868	9.74494	7.89934	5.51214	1
3646	MAL8P1.142	MAL8P1.142_v7.1_P1/1	20S proteasome beta subunit	PF3D7_0803800	MAL8P1.142				Pf3D7_08_v3:233,467..234,426(-)	proteasome subunit beta type-4	0.0131765	4.50635e-07	0.0477516	0.00015333	-2.09472	0.000524838	-1.94463	0.0372867	-1.45694	0.0697477	-1.3842	0.154536	-1.28765	0.34155	-1.18232	0.0950513	-1.37537	3.05699	2.30168	38.6529	4.15753	2.52488	1.35789	3.65706	1
1175	MAL8P1.143-a	MAL8P1.143-A_v7.1_P1/5	conserved Plasmodium protein, unknown function	?	?	?	?	?	?	?	0.000119326	1.69558e-05	0.000137869	0.0111323	-1.41309	0.118779	-1.22887	0.861998	-1.02281	0.181097	-1.19225	0.000444276	-1.65017	0.0364897	-1.32367	0.520238	-1.09357	6.08265	2.51973	25.0436	1.48204	6.99159	2.06875	2.01206	1
1878	MAL8P1.144	MAL8P1.144_v7.1_P1/5	AAA family ATPase, putative	PF3D7_0803500	MAL8P1.144				Pf3D7_08_v3:217,888..222,291(+)	AAA family ATPase, putative	2.04222e-10	0.741479	2.59134e-12	0.0508994	1.5411	0.00285025	1.98823	0.328008	1.23624	0.459961	1.17318	0.969107	-1.00837	0.000164854	-2.47134	0.167869	-1.37978	20.261	23.1097	0.110623	0.0180251	34.0816	27.7666	5.54004	1
1852	MAL8P1.145	MAL8P1.145_v7.1_P2/2	mitogen-activated protein kinase organizer 1, putative	PF3D7_0803300	MAL8P1.145				Pf3D7_08_v3:208,451..210,291(+)	mitogen-activated protein kinase organizer 1, putative	2.86196e-13	0.0693068	1.54881e-10	0.000206086	2.41305	0.0350714	1.59233	0.0194145	-1.68201	0.411439	-1.19271	0.324453	-1.236	0.971341	-1.0077	0.108591	1.45254	32.4975	36.4494	3.51819	0.563719	25.1883	20.1796	5.44781	1
1357	MAL8P1.146	MAL8P1.146_v7.1_P1/3	filament assembling protein, putative	PF3D7_0803200	MAL8P1.146				Pf3D7_08_v3:204,241..206,661(-)	filament assembling protein, putative	2.93566e-10	0.147104	3.85758e-11	0.0013345	4.17133	0.000491006	4.82777	0.00300913	3.68916	0.0176332	-2.7705	0.1194	-1.92052	0.521289	1.30309	0.0604362	2.33536	19.7125	82.1598	2.20132	1.3107	27.9749	83.2833	20.2441	1
864	MAL8P1.15	MAL8P1.15_v7.1_P2/4	conserved Plasmodium protein, unknown function	PF3D7_0828100	MAL8P1.15				Pf3D7_08_v3:1,212,337..1,215,630(-)	conserved Plasmodium protein, unknown function	6.84999e-13	0.542	4.19982e-11	0.112502	1.4385	0.000874647	-2.25769	0.815893	-1.05376	0.498204	1.16509	0.0361591	1.62719	0.0200943	1.72351	0.00556063	2.02668	30.5887	38.0534	0.37945	0.0674356	27.7979	24.7011	6.04245	1
1451	MAL8P1.150	MAL8P1.150_v7.1_P5/7	adenylyl cyclase beta, putative	PF3D7_0802600	MAL8P1.150				Pf3D7_08_v3:180,563..188,113(+)	adenylyl cyclase beta	1.00319e-08	0.508299	2.65149e-10	0.0351118	2.70651	6.65414e-05	7.85609	0.067578	2.35498	0.665329	-1.21892	0.00414537	-4.03323	0.407602	-1.46287	0.541735	1.34844	14.9376	76.7847	0.446954	0.328215	24.1698	88.7442	24.9675	1
2240	MAL8P1.151	MAL8P1.151_v7.1_P4/4	inositol phosphatase, putative	PF3D7_0802500	MAL8P1.151				Pf3D7_08_v3:174,647..178,906(-)	inositol 5-phosphatase, putative	9.56776e-07	0.0116151	2.02892e-07	0.0110725	1.37356	0.0387332	1.28916	0.000333073	1.6021	0.373688	1.11236	0.897469	-1.01545	0.480556	-1.0879	0.0702398	1.2662	10.053	3.50325	7.11631	0.354267	13.9005	3.46001	1.6926	1
2046	MAL8P1.152	MAL8P1.152_v7.1_P3/3	conserved Plasmodium protein, unknown function	PF3D7_0802400	MAL8P1.152				Pf3D7_08_v3:171,865..174,385(+)	conserved Plasmodium protein, unknown function	3.33641e-17	0.178621	1.65023e-09	6.55536e-05	-1.59044	0.513899	-1.06961	0.512783	-1.0698	0.643083	-1.04885	0.434073	1.0841	0.675131	1.04407	4.39934e-06	-1.81286	59.3154	15.4159	1.8862	0.0700308	20.936	3.88656	1.26235	1
75	MAL8P1.153	MAL8P1.153_v7.1_P4/8	transcription factor with AP2 domain(s), putative	PF3D7_0802100	MAL8P1.153				Pf3D7_08_v3:151,808..159,668(-)	AP2 domain transcription factor, putative	1.65954e-12	0.081277	1.72538e-13	0.00102712	3.00119	0.000276114	3.45956	0.416875	1.28599	0.000542451	-3.21788	0.00571738	-2.46649	0.324711	-1.35774	0.9067	1.03939	28.7506	67.2558	3.22803	1.07875	41.2611	68.9439	11.3622	1
498	MAL8P1.154	MAL8P1.154_v7.1_P7/14	conserved Plasmodium protein, unknown function	PF3D7_0801900	MAL8P1.154				Pf3D7_08_v3:128,849..142,837(+)	lysine-specific histone demethylase, putative	0.000179274	9.29378e-06	2.7082e-05	0.00991996	-1.47597	0.731932	-1.05046	0.050286	1.33543	0.082509	1.29044	0.000264968	1.78609	0.000182487	1.81924	0.973752	1.00506	5.79288	2.93884	27.0979	1.9639	8.48684	3.07538	2.46412	1
3199	MAL8P1.156	MAL8P1.156_v7.1_P2/3	mannose-6-phosphate isomerase, putative	PF3D7_0801800	MAL8P1.156				Pf3D7_08_v3:119,032..122,067(-)	mannose-6-phosphate isomerase, putative	1.90479e-10	0.0668395	0.000147734	0.0106765	-1.36804	0.277887	1.13644	0.141949	-1.19051	0.486874	1.08495	0.333417	1.12053	0.8878	1.01662	0.140255	-1.20592	20.3677	6.84344	3.585	0.172077	6.93098	1.66341	1.63198	1
46	MAL8P1.157	MAL8P1.157_v7.1_P1/6	ubiquitin-like protease 1 homolog, Ulp1 homolog, putative	PF3D7_0801700	MAL8P1.157				Pf3D7_08_v3:112,299..117,877(+)	sentrin-specific protease 2, putative	1.31489e-15	3.43621e-06	2.4239e-14	3.84407e-06	-1.8878	0.00104311	-1.51317	0.000399548	-1.57397	0.0714058	-1.23985	0.5553	1.07124	0.0518202	1.26216	0.995178	1.00075	46.6984	15.5657	30.6666	1.46027	47.2231	11.2433	1.619	1
1925	MAL8P1.160	MAL8P1.160_v7.1_P1/1	Plasmodium exported protein (hyp7), unknown function	PF3D7_0800900	MAL8P1.160				Pf3D7_08_v3:83,128..83,904(+)	Plasmodium exported protein (hyp7), unknown function, pseudogene	4.95055e-14	0.0121024	2.0532e-11	0.217636	1.74986	0.0164716	3.077	0.0159572	3.09527	0.262253	1.66165	0.24663	-1.69068	0.0114046	-3.29241	0.864329	1.08544	36.6435	181.603	7.027	4.97507	29.3158	103.777	24.0718	1
2932	MAL8P1.161	MAL8P1.161_v7.1_P1/1	Plasmodium exported protein (hyp7), unknown function	PF3D7_0800800	MAL8P1.161				Pf3D7_08_v3:79,823..80,642(+)	Plasmodium exported protein (hyp7), unknown function	6.20401e-08	0.00470417	8.73543e-10	0.245424	1.54716	0.431219	-1.34195	0.72397	-1.14052	0.596096	1.21843	0.456737	-1.32044	1.08056e-05	-6.7091	0.0505382	-2.22598	12.8305	43.6895	9.15355	4.45271	22.0221	53.5629	16.5392	1
49	MAL8P1.17	MAL8P1.17_v7.1_P1/2	protein disulfide isomerase	PF3D7_0827900	MAL8P1.17				Pf3D7_08_v3:1,206,788..1,208,394(-)	protein disulfide isomerase	4.56411e-07	0.193164	7.61e-07	0.549663	-1.08906	0.342278	-1.14566	0.337238	1.14732	0.652622	-1.06622	0.0327645	1.36922	0.00316705	1.56587	0.00551902	1.5641	10.7623	5.35801	1.76245	0.125349	12.2865	4.36917	2.41814	1
802	MAL8P1.18	MAL8P1.18_v7.1_P3/5	conserved Plasmodium protein, unknown function	PF3D7_0827600	MAL8P1.18				Pf3D7_08_v3:1,187,623..1,192,925(-)	conserved Plasmodium protein, unknown function	2.61683e-12	3.4117e-06	3.64743e-09	0.818526	1.06383	0.0244173	-1.87805	0.00398792	-2.28532	0.0208981	-1.91206	0.130066	-1.51456	0.771236	1.08158	0.574988	-1.17581	27.841	49.7879	30.693	7.84116	19.6369	25.0832	8.68599	1
1098	MAL8P1.19	MAL8P1.19_v7.1_P4/4	DEAD/DEAH box ATP-dependent RNA helicase, putative	PF3D7_0827000	MAL8P1.19				Pf3D7_08_v3:1,167,579..1,171,448(-)	ATP-dependent RNA helicase DBP10, putative	4.65917e-11	0.0675889	3.64584e-06	0.00163431	-1.77381	0.854887	1.03134	0.956838	-1.00917	0.624126	1.08634	0.279652	1.202	0.0448915	1.4173	4.04886e-05	-2.32462	22.6188	15.8443	3.56442	0.356693	10.5251	5.26626	3.4024	1
3407	MAL8P1.2	MAL8P1.2_v7.1_P1/2	Plasmodium exported protein (PHISTb), unknown function	PF3D7_0831000	MAL8P1.2				Pf3D7_08_v3:1,321,417..1,322,825(+)	Plasmodium exported protein (PHISTb), unknown function	2.66879e-15	3.15718e-06	6.09671e-13	0.432242	1.25437	0.592451	-1.16659	0.339276	1.31833	0.00502168	2.35257	0.000290929	3.16202	0.0455355	1.80746	0.596492	-1.17695	44.565	90.4999	30.9804	8.98757	37.7739	54.7921	9.86358	1
1058	MAL8P1.20	MAL8P1.20_v7.1_P1/3	conserved Plasmodium protein, unknown function	PF3D7_0826900	MAL8P1.20				Pf3D7_08_v3:1,164,655..1,167,205(+)	conserved Plasmodium protein, unknown function	0.000311248	9.58811e-05	0.0570577	0.0909154	-2.1541	0.0848373	-2.18775	0.321296	-1.55876	0.015469	-3.07836	0.0892989	-2.16281	0.73989	-1.15908	0.239029	-1.75954	5.40977	26.2816	19.5313	13.5552	2.40401	8.34221	23.5968	1
3600	MAL8P1.200	MAL8P1.200_v7.1_P1/1	acetyltransferase, putative	PF3D7_0805400	MAL8P1.200				Pf3D7_08_v3:303,370..304,596(-)	N-acetyltransferase, GNAT family, putative	1.42756e-09	0.000205937	9.57642e-08	0.740363	1.05136	0.720621	-1.05555	0.511881	1.10448	0.537905	1.09778	0.00396074	1.58958	0.0310918	1.40101	0.320099	1.17552	17.4525	9.79728	17.2816	1.38591	14.8734	5.9639	2.72665	1
2267	MAL8P1.201	MAL8P1.201_v7.1_P2/4	conserved Plasmodium protein, unknown function	PF3D7_0805500	MAL8P1.201				Pf3D7_08_v3:305,295..308,549(-)	conserved Plasmodium protein, unknown function	2.86044e-10	0.521117	6.33719e-11	0.615696	-1.06715	0.136248	1.21626	0.0581189	1.28605	0.0830504	-1.25748	0.0333494	-1.32914	0.428361	-1.10831	0.517236	-1.09391	19.7513	8.11957	0.420351	0.024686	26.9536	7.91455	1.99672	1
2859	MAL8P1.202	MAL8P1.202_v7.1_P1/1	apicoplast phosphatidic acid phosphatase, putative	PF3D7_0805600	MAL8P1.202				Pf3D7_08_v3:312,034..312,960(+)	PAP2-like protein, putative	7.50595e-07	0.490765	2.79625e-09	0.597399	1.12436	0.0244162	1.67835	0.339017	1.23763	0.205444	1.32817	0.661939	1.10183	0.0013959	-2.14909	0.0164814	-1.80934	10.2823	12.4126	0.485305	0.083693	20.0655	17.3019	5.86345	1
437	MAL8P1.203	MAL8P1.203_v7.1_P4/5	serine/threonine protein kinase, FIKK family	PF3D7_0805700	MAL8P1.203				Pf3D7_08_v3:314,172..318,726(-)	serine/threonine protein kinase, FIKK family	4.24829e-11	0.0362281	3.2347e-10	0.0183961	2.30563	0.0367734	2.08177	0.924297	1.03282	0.0076383	-2.60285	0.0501112	-1.98398	0.737596	-1.12068	0.574448	1.22684	22.7729	64.7082	4.75501	1.93016	23.8012	48.3072	13.8013	1
1777	MAL8P1.204	MAL8P1.204_v7.1_P2/3	DnaJ protein, putative	PF3D7_0831200	MAL8P1.204				Pf3D7_08_v3:1,333,288..1,336,299(+)	DnaJ protein, putative	6.26063e-12	0.193061	3.09966e-08	0.0690286	-1.43328	0.662213	1.08816	0.123783	1.35331	0.684814	-1.08165	0.0198518	-1.59776	0.540529	1.12584	0.05375	-1.50609	26.1651	24.0187	1.76329	0.231235	16.4167	10.7643	4.45869	1
3005	MAL8P1.206	MAL8P1.206_v7.1_P1/1	Plasmodium exported protein, unknown function	PF3D7_0831400	MAL8P1.206				Pf3D7_08_v3:1,344,405..1,345,487(-)	Plasmodium exported protein, unknown function	2.5046e-15	0.000905951	7.16759e-15	0.254741	-1.64724	4.1626e-08	-20.6198	0.1369	-1.9277	0.620004	1.2406	0.0743228	2.21058	0.0896623	2.12263	0.131793	2.03648	44.7528	207.467	13.2221	8.75654	51.2852	169.822	22.517	1
2448	MAL8P1.208	MAL8P1.208_v7.1_P1/2NU	rifin	?	?	?	?	?	?	?	0.004817	7.97462e-13	0.000396387	0.00150923	-4.30229	0.0477895	-2.38242	1.54106e-07	-16.14	2.97051e-06	-10.6092	1.68147e-06	-11.4965	0.00353879	-3.76249	8.46731e-05	-7.51226	3.65255	16.3054	122.702	78.2507	6.0893	19.4166	21.6828	1
2095	MAL8P1.209	MAL8P1.209_v7.1_P1/1NU	var-like protein	PF3D7_0701000	MAL8P1.209, MAL8P1.211	MAL8P1.211			Pf3D7_07_v3:52,086..53,636(+)	erythrocyte membrane protein 1 (PfEMP1), pseudogene	0.118058	7.12215e-08	0.0139406	0.000271352	-3.76709	0.000373445	-3.63255	0.418278	-1.30678	0.472115	-1.26801	0.000315643	-3.70291	0.0182923	-2.24687	0.00531334	-2.82854	1.80653	4.81148	46.7973	17.8055	3.37517	6.42097	12.9364	1
3282	MAL8P1.21	MAL8P1.21_v7.1_P1/1	SNARE protein, putative	PF3D7_0826600	MAL8P1.21				Pf3D7_08_v3:1,157,321..1,158,151(-)	SNARE protein, putative	4.55513e-06	0.909429	0.000591651	0.543396	1.17394	0.318785	-1.30255	0.266668	1.34316	0.351273	1.28005	0.933644	-1.02215	0.328218	1.29582	0.796182	-1.07541	8.65158	14.7473	0.0131352	0.00319856	5.75999	7.01311	8.27938	1
2611	MAL8P1.213	MAL8P1.213_v7.1_P1/1	Pfmc-2TM Maurer's cleft two transmembrane protein	PF3D7_0700800	MAL8P1.213				Pf3D7_07_v3:48,300..49,106(+)	Pfmc-2TM Maurer's cleft two transmembrane protein	1.5854e-10	7.67057e-16	4.03159e-10	0.000826422	-6.38175	5.11476e-10	-76.0772	2.60993e-08	-37.6859	6.05565e-05	-10.0879	0.000223083	-8.05234	4.94548e-05	-10.4434	8.2071e-07	-25.76	20.6507	131.61	201.225	183.206	23.3979	106.513	30.9554	1
2175	MAL8P1.216	MAL8P1.216_v7.1_P1/1	rifin	PF3D7_0700500	MAL8P1.216				Pf3D7_07_v3:40,288..41,453(-)	rifin	0.0877781	1.95304e-09	0.00595903	0.000375222	-9.74444	0.00107121	-7.86056	1.24059e-05	-19.0262	4.43965e-05	-14.8625	0.00083477	-8.27754	0.919381	-1.06056	0.00272964	-7.33269	1.97521	16.4016	65.489	77.6861	3.98361	23.6277	40.3324	1
2250	MAL8P1.218	MAL8P1.218_v7.1_P1/1NU	rifin	PF3D7_0700300	MAL8P1.218				Pf3D7_07_v3:33,585..34,804(-)	rifin	2.86306e-11	5.37116e-06	6.78195e-11	0.00236912	-4.08494	2.0758e-05	-8.28756	0.0324115	-2.60016	0.5921	-1.26076	0.640727	1.22351	0.689197	-1.18863	5.42276e-05	-8.26986	23.4413	107.446	29.0378	19.0141	26.8164	87.7975	22.2634	1
2901	MAL8P1.219	MAL8P1.219_v7.1_P1/1	rifin	PF3D7_0700200	MAL8P1.219				Pf3D7_07_v3:30,097..31,269(+)	rifin	0.162116	1.37719e-15	3.09263e-05	0.0306116	-4.10282	5.075e-06	-29.4791	1.04187e-10	-309.039	1.43019e-08	-102.079	1.37721e-07	-62.8239	0.0130199	-5.15488	0.000599083	-12.5667	1.62415	15.8827	193.302	270.045	8.35981	58.394	47.4986	1
2087	MAL8P1.22	MAL8P1.22_v7.1_P1/1	dehydrodolichyl diphosphate synthetase, putative	PF3D7_0826400	MAL8P1.22				Pf3D7_08_v3:1,148,010..1,149,830(-)	dehydrodolichyl diphosphate synthetase, putative	3.82479e-10	0.0498609	1.5188e-07	0.0441977	2.07802	0.376382	1.36851	0.309112	-1.43533	0.133781	-1.71195	0.275368	-1.47408	0.772148	1.10756	0.730844	-1.13858	19.3198	59.1139	4.13533	1.80759	14.2708	31.1894	14.8617	1
984	MAL8P1.23	MAL8P1.23_v7.1_P25/25	ubiquitin-protein ligase 1, putative	PF3D7_0826100	MAL8P1.23				Pf3D7_08_v3:1,113,369..1,139,144(-)	HECT-like E3 ubiquitin ligase, putative	8.75775e-14	5.4766e-07	2.45749e-07	0.00919593	-1.29161	0.459057	1.07184	0.111122	1.16362	0.0516025	1.2055	0.0262757	1.24016	0.00434195	1.32729	0.194466	-1.14007	35.2485	7.55594	37.8433	1.15888	13.6589	2.09139	1.04119	1
2248	MAL8P1.25a	MAL8P1.25A_v7.1_P1/1	conserved Plasmodium protein, unknown function	PF3D7_0825400	MAL8P1.25a				Pf3D7_08_v3:1,096,423..1,097,363(+)	conserved Apicomplexan protein, unknown function	7.52845e-11	0.000130208	9.51103e-07	4.7526e-05	3.42477	0.033163	1.79832	0.321085	1.30491	0.046171	1.728	0.00761415	2.11687	0.00273478	2.34925	0.00450448	2.36216	21.8308	38.0899	18.6178	4.64056	12.0261	14.9877	8.47465	1
3102	MAL8P1.26	MAL8P1.26_v7.1_P1/1	conserved protein, unknown function	PF3D7_0825300	MAL8P1.26				Pf3D7_08_v3:1,095,116..1,095,562(-)	SAYSvFN domain-containing protein, putative	5.09251e-10	1.00452e-05	1.84047e-07	1.33741e-06	2.68356	0.703773	1.06681	0.0433965	1.42458	0.238177	1.22447	0.00874244	1.59885	1.8384e-05	2.31515	2.17265e-07	3.20681	18.9017	13.4297	26.828	2.72305	14.0245	7.11744	3.45101	1
1663	MAL8P1.29	MAL8P1.29_v7.1_P5/5	conserved Plasmodium protein, unknown function	PF3D7_0825000	MAL8P1.29				Pf3D7_08_v3:1,086,048..1,091,248(+)	conserved Plasmodium protein, unknown function	4.68324e-11	1.70119e-05	4.20748e-07	0.366082	1.17192	0.890187	-1.02438	0.366087	-1.17192	0.00254896	-1.75802	0.00604289	-1.66052	0.775125	-1.05113	0.924692	-1.01779	22.6102	16.9367	25.0325	2.67874	12.9949	6.95293	3.63835	1
3553	MAL8P1.3	MAL8P1.3_v7.1_P1/1	Plasmodium exported protein (hyp9), unknown function	PF3D7_0830700	MAL8P1.3				Pf3D7_08_v3:1,307,053..1,307,924(+)	Plasmodium exported protein (hyp9), unknown function	4.26045e-09	0.15674	0.000152755	0.0180907	-2.13382	0.0975658	-1.68183	0.128538	-1.60861	0.706925	-1.12266	0.45818	-1.25732	0.361249	1.32632	6.96482e-06	-5.63838	16.0073	37.2286	2.09708	0.696752	6.90175	11.4655	11.2964	1
3892	MAL8P1.300	MAL8P1.300_v7.1_P1/1	integral membrane protein	PF3D7_0807400	MAL8P1.300				Pf3D7_08_v3:384,298..385,797(+)	coenzyme Q-binding protein COQ10 homolog, mitochondrial	8.16063e-05	0.071121	6.98533e-06	0.000670996	3.67215	0.00340649	2.98655	0.926169	-1.03297	0.583567	1.21205	0.562641	1.22526	0.55212	-1.23205	0.11005	1.83955	6.35877	19.176	3.47075	1.49524	9.83885	21.1934	14.6476	1
3798	MAL8P1.31	MAL8P1.31_v7.1_P1/1	anamorsin related protein, putative	PF3D7_0824600	MAL8P1.31				Pf3D7_08_v3:1,068,563..1,069,902(+)	Fe-S cluster assembly protein DRE2, putative	7.09808e-06	0.338165	0.208198	0.260936	-1.44653	0.93615	-1.0264	0.414869	-1.30546	0.127866	1.65528	0.697551	-1.13492	0.827059	1.07368	0.00174253	-3.23263	8.27506	21.5522	0.943795	0.351156	1.52464	2.83636	12.6503	1
3415	MAL8P1.32	MAL8P1.32_v7.1_P2/2	nucleoside transporter 2	PF3D7_0824400	MAL8P1.32				Pf3D7_08_v3:1,062,304..1,064,061(-)	nucleoside transporter 2	1.2196e-15	2.3377e-09	3.91065e-14	0.0393364	-1.50751	9.50956e-06	-2.706	2.64354e-06	-2.9368	0.0711136	-1.42875	0.704005	1.07614	0.53267	-1.12831	0.827625	-1.04595	46.9304	42.9921	64.457	8.43542	45.7062	29.9076	4.44955	1
3695	MAL8P1.320	MAL8P1.320_v7.1_P1/1NU	hypothetical protein, pseudogene	?	?	?	?	?	?	?	0.0561478	0.00036562	0.0409872	0.00110606	-12.5952	0.000579908	-14.8415	0.196556	-2.55036	0.0321197	-4.89518	0.322525	-2.04112	0.594135	1.46568	0.00907275	-8.1891	2.2282	28.1128	15.6625	28.23	2.62888	23.6915	61.2815	1
3417	MAL8P1.33	MAL8P1.33_v7.1_P1/3	GTP binding protein, putative	PF3D7_0824300	MAL8P1.33				Pf3D7_08_v3:1,059,246..1,061,567(-)	GTP-binding protein, putative	2.2168e-10	0.281977	1.99605e-09	0.00893199	2.33993	0.0334536	1.9725	0.0409786	-1.9177	0.0890864	-1.7099	0.970586	-1.01145	0.443829	1.26802	0.138127	1.64466	20.136	47.2403	1.19516	0.400559	20.6188	34.5522	11.3952	1
367	MAL8P1.35	MAL8P1.35_v7.1_P2/2	exonuclease, putative	PF3D7_0824100	MAL8P1.35				Pf3D7_08_v3:1,052,771..1,053,991(+)	exonuclease, putative	0.00257274	0.466301	4.72651e-08	0.0246586	2.05594	0.00131422	2.92568	0.0201957	-2.11084	0.663494	-1.14403	0.147976	1.57433	0.990168	-1.00381	0.173104	-1.57781	4.03571	9.4729	0.542867	0.182036	15.8277	26.537	11.401	1
3597	MAL8P1.36	MAL8P1.36_v7.1_P1/1	conserved Plasmodium protein, unknown function	PF3D7_0823700	MAL8P1.36				Pf3D7_08_v3:1,041,832..1,042,327(-)	mitochondrial import receptor subunit TOM7, putative	9.79279e-09	0.00303453	2.48016e-08	0.0557827	-1.63808	0.156448	-1.43494	0.393052	1.24057	0.00602513	2.07508	0.0764129	1.5768	0.0824164	1.56201	0.616639	1.14408	14.967	23.2128	10.1915	2.25804	16.7339	18.5379	7.53309	1
3446	MAL8P1.4	MAL8P1.4_v7.1_P2/2	Plasmodium exported protein (PHISTc), unknown function	PF3D7_0830600	MAL8P1.4				Pf3D7_08_v3:1,303,323..1,304,813(+)	Plasmodium exported protein (PHISTc), unknown function	1.47567e-10	0.105738	2.58896e-09	0.0404894	-2.49823	0.252391	-1.64953	0.801548	-1.11504	0.234506	1.68245	0.445771	-1.3932	0.000347598	-5.52207	0.000298201	-6.36811	20.7621	95.8142	2.76173	1.82071	20.191	66.5559	22.415	1
1434	MAL8P1.40	MAL8P1.40_v7.1_P1/1	RNA binding protein, putative	PF3D7_0823200	MAL8P1.40				Pf3D7_08_v3:1,022,629..1,023,846(-)	RNA-binding protein, putative	7.29049e-08	4.54525e-07	6.38519e-05	7.57886e-07	-2.75862	0.000439431	-1.92273	0.000547953	-1.89777	0.269207	-1.20758	0.072471	-1.36518	0.00340866	-1.69674	3.0239e-06	-2.72313	12.6543	8.91242	38.617	3.88541	7.68223	3.86469	3.42087	1
3226	MAL8P1.43	MAL8P1.43_v7.1_P1/1	U5 snrnp-specific protein, putative	PF3D7_0822800	MAL8P1.43				Pf3D7_08_v3:1,005,836..1,006,810(+)	U5 small nuclear ribonucleoprotein 40 kDa protein, putative	1.51417e-09	4.8476e-13	2.05456e-07	0.618987	1.06178	0.00857906	1.39546	0.000847004	1.54835	0.000433323	1.59293	2.85238e-06	1.95198	7.45023e-06	1.87868	1.42963e-05	1.90844	17.3723	6.18987	127.323	6.48089	13.8846	3.53371	1.73064	1
2053	MAL8P1.45	MAL8P1.45_v7.1_P3/3	conserved Plasmodium protein, unknown function	PF3D7_0822700	MAL8P1.45				Pf3D7_08_v3:1,000,981..1,003,755(-)	thrombospondin-related protein 1, putative	4.96838e-05	0.307237	1.07309e-08	0.784373	-1.0507	0.233435	1.243	0.179777	-1.27838	3.92139e-05	-2.33219	0.905684	1.02164	0.469154	-1.14027	0.938266	1.01507	6.72789	5.40292	1.07455	0.123276	17.963	10.3039	3.90059	1
655	MAL8P1.49	MAL8P1.49_v7.1_P2/4	conserved Plasmodium membrane protein, unknown function	PF3D7_0822200	MAL8P1.49				Pf3D7_08_v3:982,570..987,696(+)	phosphorylated CTD interacting factor 1 WW domain-containing protein, putative	2.24251e-16	3.16136e-08	5.00933e-13	0.000155986	-1.85405	0.926159	-1.01365	0.0470835	1.34864	0.0489351	1.34512	1.08364e-05	2.11324	2.61879e-05	2.02443	0.000685696	-1.7856	52.4333	27.5977	50.6767	3.81045	38.2998	14.3991	2.5565	1
3325	MAL8P1.51	MAL8P1.51_v7.1_P1/1	secretory complex protein 61 beta subunit	PF3D7_0821800	MAL8P1.51				Pf3D7_08_v3:976,074..976,644(+)	protein transport protein SEC61 subunit beta, putative	0.00356184	0.00138332	0.229448	0.310698	-1.21499	0.0246347	-1.56045	0.156281	-1.31567	0.517626	-1.1317	0.0101664	-1.6737	0.0870034	-1.39583	0.0106507	-1.7277	3.83572	3.43058	12.1327	1.55017	1.45725	0.930955	4.34413	1
3077	MAL8P1.52	MAL8P1.52_v7.1_P1/1	conserved Plasmodium protein, unknown function	PF3D7_0821400	MAL8P1.52				Pf3D7_08_v3:965,822..966,657(+)	conserved Plasmodium protein, unknown function	1.50624e-11	0.319775	3.12332e-13	0.105273	1.35486	0.00621638	1.70299	0.0284029	1.51856	0.242009	-1.24272	0.00521732	-1.72433	0.000356481	-2.06237	0.0102881	-1.69903	24.5626	20.4318	1.01948	0.121146	39.5895	23.5225	4.04029	1
1568	MAL8P1.53	MAL8P1.53_v7.1_P2/2	conserved Plasmodium protein, unknown function	PF3D7_0821000	MAL8P1.53				Pf3D7_08_v3:948,745..950,899(+)	conserved Plasmodium protein, unknown function	9.28666e-14	0.429356	2.12535e-12	1.52433e-05	3.41509	0.00161966	2.3043	0.0251949	-1.7694	0.373679	-1.24568	0.695095	-1.10112	0.928493	1.02228	0.175964	1.4334	35.1077	52.0724	0.639747	0.135555	34.5691	36.6239	7.2042	1
2656	MAL8P1.54	MAL8P1.54_v7.1_P1/5	conserved Plasmodium protein, unknown function	PF3D7_0820900	MAL8P1.54				Pf3D7_08_v3:939,583..944,645(-)	conserved Plasmodium protein, unknown function	1.59342e-07	0.148576	7.4092e-10	0.584858	1.09116	0.0400579	1.40168	0.000140008	1.97098	0.205319	-1.22659	0.0277758	-1.43854	0.205265	1.22662	0.0631942	1.3837	11.8234	7.38766	2.18489	0.195027	22.3099	9.9571	3.03489	1
23	MAL8P1.57	MAL8P1.57_v7.1_P2/3	C-13 antigen	PF3D7_0820500	MAL8P1.57				Pf3D7_08_v3:925,113..927,671(+)	protein transport protein YIF1, putative	2.66799e-05	0.0218155	2.0511e-05	0.0702039	-1.41515	0.606407	1.10142	0.0313798	1.51743	0.203329	1.27244	0.0659022	1.4233	0.606154	-1.10149	0.279542	-1.24385	7.20451	6.20858	5.77905	0.711454	8.75585	5.38962	4.18571	1
1454	MAL8P1.58	MAL8P1.58_v7.1_P1/2	phosphatidylglycerophosphate synthase	PF3D7_0820200	MAL8P1.58				Pf3D7_08_v3:912,264..914,249(-)	phosphatidylglycerophosphate synthase	0.121372	0.00133381	0.192222	0.520758	1.12729	0.170735	1.29487	0.0844602	1.38845	0.509353	1.13104	0.697441	1.07508	0.0240539	1.54668	0.000153006	2.31826	1.79071	1.52495	12.2253	1.48728	1.5797	0.960898	4.1363	1
1008	MAL8P1.59	MAL8P1.59_v7.1_P1/2	conserved Plasmodium protein, unknown function	PF3D7_0820100	MAL8P1.59				Pf3D7_08_v3:909,207..910,716(-)	RNA-binding protein, putative	0.44929	0.0227797	0.967141	0.0741394	-6.69174	0.114971	-5.30662	0.8435	1.22782	0.0937341	-5.92368	0.113078	-5.35508	0.677276	1.54203	0.724655	-1.47954	0.998441	26.5432	5.68989	21.6091	0.182913	3.47333	129.125	1
1589	MAL8P1.6	MAL8P1.6_v7.1_P1/1	early transcribed membrane protein 8	PF3D7_0829600	MAL8P1.6				Pf3D7_08_v3:1,269,135..1,269,647(+)	early transcribed membrane protein 8	0.000583771	0.0379214	8.16022e-05	0.254195	1.83163	0.0258304	3.37443	0.000438562	7.62777	0.375083	-1.59838	0.225688	-1.90384	0.0823086	2.54518	0.571032	1.37592	4.98588	33.9066	4.66516	4.53222	7.459	36.2322	33.0311	1
3360	MAL8P1.62	MAL8P1.62_v7.1_P1/1	conserved Plasmodium protein, unknown function	PF3D7_0819600	MAL8P1.62				Pf3D7_08_v3:885,198..886,136(-)	conserved Plasmodium protein, unknown function	5.15165e-10	4.73014e-05	2.78295e-07	0.000835396	1.96614	0.782873	-1.05257	0.0667752	-1.41812	0.414911	-1.16444	0.0187823	-1.57649	0.0170305	-1.58856	0.50893	-1.14069	18.8849	16.0477	21.7085	2.63528	13.5035	8.19623	4.12741	1
1818	MAL8P1.63	MAL8P1.63_v7.1_P2/2	conserved protein, unknown function	PF3D7_0819500	MAL8P1.63				Pf3D7_08_v3:881,590..884,390(+)	conserved protein, unknown function	3.25396e-15	0.00570759	7.04956e-17	0.0041307	-2.25449	5.42003e-10	-9.59426	0.043886	-1.73888	0.0333555	1.7972	0.00302594	2.32598	0.0365482	1.77776	0.756375	-1.0924	43.9833	76.7576	8.70609	2.1705	69.6299	86.7963	8.47646	1
37	MAL8P1.64	MAL8P1.64_v7.1_P4/4	conserved Plasmodium protein, unknown function	PF3D7_0819000	MAL8P1.64				Pf3D7_08_v3:863,505..868,137(-)	conserved Plasmodium protein, unknown function	4.17053e-10	2.42781e-06	0.000724884	0.262601	-1.18564	0.106197	1.28155	0.080727	1.30875	0.324711	1.16111	0.0150467	1.4664	0.0220024	1.4316	0.228501	-1.21649	19.1926	10.7108	31.964	2.54829	5.59559	2.23051	2.71061	1
14	MAL8P1.65	MAL8P1.65_v7.1_P3/4	DNA helicase, putative	PF3D7_0818700	MAL8P1.65				Pf3D7_08_v3:848,277..852,947(-)	DNA helicase, putative	0.00317665	0.000138551	0.0410527	0.000366562	-2.13916	0.0459221	-1.48914	0.170871	-1.30848	0.123152	-1.35504	0.00192802	-1.90794	0.129799	-1.34766	0.00683671	-1.80705	3.90576	3.60305	18.4345	2.4294	2.6278	1.73152	4.4807	1
322	MAL8P1.66	MAL8P1.66_v7.1_P1/1	conserved Plasmodium protein, unknown function	PF3D7_0818600	MAL8P1.66				Pf3D7_08_v3:845,253..847,380(-)	BEM46-like protein, putative	1.11348e-09	0.687312	2.21218e-11	0.0276257	1.8258	0.00499477	2.19325	0.00263503	2.33721	0.641685	-1.13069	0.273981	-1.33758	0.00275077	-2.32739	0.732781	-1.10105	17.7939	30.4116	0.164807	0.0402389	29.1546	35.5915	8.30134	1
2738	MAL8P1.67	MAL8P1.67_v7.1_P1/1	nucleolar preribosomal assembly protein, putative	PF3D7_0818400	MAL8P1.67				Pf3D7_08_v3:835,978..836,848(-)	rRNA-processing protein FCF1, putative	4.09436e-05	0.394256	8.14763e-05	0.0133288	-1.87275	0.0216721	-1.783	0.0580552	-1.60206	0.91067	1.02753	0.244988	1.32878	0.706307	1.0956	0.0283014	-1.80114	6.87449	9.9127	0.744542	0.153371	7.46039	7.68395	7.00377	1
145	MAL8P1.69	MAL8P1.69_v7.1_P1/1	14-3-3 protein, putative	PF3D7_0818200	MAL8P1.69				Pf3D7_08_v3:830,006..831,454(+)	14-3-3 protein	0.133297	2.68934e-05	0.392624	0.0496494	1.58769	0.0400466	1.62398	0.0359798	1.64202	0.0971266	1.47321	0.0262053	1.69538	0.0457981	1.60134	0.00492155	2.07573	1.73701	2.23761	23.5181	4.32797	1.07285	0.987167	6.25694	1
3249	MAL8P1.70	MAL8P1.70_v7.1_P1/2	conserved Plasmodium protein, unknown function	PF3D7_0818100	MAL8P1.70				Pf3D7_08_v3:824,564..826,518(+)	zinc finger protein, putative	1.69485e-14	7.04242e-05	1.87049e-15	0.905347	-1.04377	0.0846583	1.88732	0.490134	1.28337	0.40105	-1.35541	3.35345e-07	-9.57154	3.38395e-05	-5.51001	0.0484467	-2.18708	39.3945	125.826	20.4704	9.34033	56.1141	128.02	15.5137	1
263	MAL8P1.71	MAL8P1.71_v7.1_P1/2	conserved Plasmodium protein, unknown function	PF3D7_0818000	MAL8P1.71				Pf3D7_08_v3:821,334..822,452(+)	U4/U6.U5 small nuclear ribonucleoprotein, putative	0.23968	0.0372863	0.0102426	0.119831	-1.53202	0.8764	-1.04279	0.851604	1.05169	0.717419	-1.10249	0.179441	-1.44263	0.0970495	-1.57809	0.0023494	-2.55949	1.39422	2.48902	4.69833	1.19824	3.59348	4.58232	8.67119	1
3336	MAL8P1.72	MAL8P1.72_v7.1_P1/1	high mobility group protein	PF3D7_0817900	MAL8P1.72				Pf3D7_08_v3:816,803..817,102(-)	high mobility group protein B2	0.609922	0.114378	0.922855	0.224223	-4.29235	0.514381	-2.17156	0.928571	1.11213	0.353497	-3.02539	0.207456	-4.53716	0.955885	1.06778	0.821246	1.33171	0.778077	26.9142	2.62581	12.9755	0.27641	6.82943	168.012	1
1987	MAL8P1.73	MAL8P1.73_v7.1_P3/4	rhoptry neck protein 5, putative	PF3D7_0817700	MAL8P1.73				Pf3D7_08_v3:805,797..813,465(-)	rhoptry neck protein 5	1.30234e-12	0.000126661	1.28557e-13	0.155096	1.88895	0.134654	1.95487	0.0809547	2.19625	0.000333264	-5.7273	8.83952e-07	-13.7444	0.0502017	-2.43049	0.467199	-1.41034	29.2446	139.749	18.6995	12.7654	42.1118	143.74	23.2105	1
1452	MAL8P1.74	MAL8P1.74_v7.1_P2/3	conserved Plasmodium protein, unknown function	PF3D7_0817400	MAL8P1.74				Pf3D7_08_v3:794,287..797,806(-)	phosphatase, putative	4.73862e-19	2.00798e-07	2.97411e-16	0.932605	-1.01133	0.00538072	-1.48183	2.67425e-06	-2.10325	0.00433608	-1.49824	0.267618	1.16074	0.17363	1.20179	0.500236	1.10114	77.7698	33.9777	42.1114	2.62835	63.3734	19.777	2.12209	1
2539	MAL8P1.75a	MAL8P1.75A_v7.1_P3/3	GTPase, putative	PF3D7_0817100	MAL8P1.75a				Pf3D7_08_v3:774,299..776,791(+)	tRNA modification GTPase, putative	6.55982e-05	0.807856	0.000160102	0.208316	-2.08788	0.217847	-2.05572	0.345537	-1.73158	0.848538	1.11679	0.326877	1.76996	0.0739012	2.88183	0.0252901	4.20309	6.51999	53.6465	0.0600714	0.0706096	6.86075	40.3216	39.9645	1
281	MAL8P1.8	MAL8P1.8_v7.1_P1/2	prolyl 4-hydroxylase alpha subunit 1, putative	PF3D7_0829400	MAL8P1.8				Pf3D7_08_v3:1,257,716..1,259,041(-)	prolyl 4-hydroxylase subunit alpha, putative	6.66036e-08	0.00105912	3.04148e-07	0.495128	1.27061	0.249521	1.50212	0.83019	1.07794	0.00184206	-3.23256	0.0119425	-2.51564	0.312317	-1.42788	0.652554	-1.1837	12.7528	38.4187	12.8165	5.51578	13.3932	28.8198	14.6324	1
2116	MAL8P1.82	MAL8P1.82_v7.1_P1/6	vacuolar sorting protein VPS9, putative	PF3D7_0815800	MAL8P1.82				Pf3D7_08_v3:735,680..741,181(-)	vacuolar protein sorting-associated protein 9, putative	1.95963e-13	0.000150471	4.30507e-08	1.98085e-07	2.33849	0.936532	1.01055	0.836295	-1.02761	0.637911	-1.06409	0.000709674	-1.62758	0.0857917	-1.26045	0.533226	1.09203	33.3567	14.2571	18.192	1.11079	15.9568	4.87153	2.076	1
697	MAL8P1.84	MAL8P1.84_v7.1_P1/2	conserved Plasmodium protein, unknown function	PF3D7_0815500	MAL8P1.84				Pf3D7_08_v3:727,662..729,728(+)	conserved Plasmodium protein, unknown function	1.07076e-10	0.0289741	6.49562e-11	0.0131332	2.6468	0.0857685	1.9311	0.593771	1.2217	4.53312e-05	-5.68639	0.0436668	-2.17977	0.905162	1.04565	0.168089	1.75057	21.2662	73.4605	5.20021	2.56618	26.9036	66.3813	16.7782	1
1053	MAL8P1.86	MAL8P1.86_v7.1_P1/1	product unspecified	PF3D7_0815000	MAL8P1.86				Pf3D7_08_v3:709,333..710,600(-)	selenoprotein	1.94863e-15	4.79039e-10	3.03872e-14	0.596713	-1.15992	9.00611e-10	-10.2228	5.89787e-06	-4.42781	0.100306	-1.59867	0.496667	-1.21026	0.872563	-1.04591	0.090861	-1.67646	45.5019	87.6586	73.9463	20.3509	46.5009	63.988	9.3572	1
1495	MAL8P1.88	MAL8P1.88_v7.1_P2/3	conserved Plasmodium protein, unknown function	PF3D7_0814500	MAL8P1.88				Pf3D7_08_v3:700,376..702,652(+)	conserved Plasmodium protein, unknown function	1.57395e-13	0.225037	7.24807e-14	0.245989	-1.43987	0.452221	1.2647	0.00846202	2.37086	0.00307497	2.67597	0.494755	-1.23756	0.000587131	-3.22412	0.0783437	-1.82069	33.8627	80.6561	1.52698	0.519578	43.8112	74.5372	11.569	1
2816	MAL8P1.9	MAL8P1.9_v7.1_P1/1	u6 snRNA-associated Sm-like protein, putative	PF3D7_0829300	MAL8P1.9				Pf3D7_08_v3:1,256,555..1,257,133(+)	U6 snRNA-associated Sm-like protein LSm8, putative	6.69939e-05	3.69977e-06	4.03395e-05	0.000294405	-2.89369	3.30044e-05	-3.52347	0.00571944	-2.17519	0.171499	-1.44485	0.110265	-1.54034	0.640628	1.13212	0.00664133	-2.25761	6.50437	11.2752	30.394	7.52676	8.10831	10.0397	8.41973	1
1990	MAL8P1.91	MAL8P1.91_v7.1_P2/2	phospholipase DDHD1, putative	PF3D7_0814400	MAL8P1.91				Pf3D7_08_v3:695,215..697,522(-)	phospholipase DDHD1, putative	2.5141e-09	0.290451	4.48189e-11	0.625974	-1.15003	0.152795	1.51531	0.0109486	2.1489	0.304958	-1.34448	0.0002808	-3.16095	0.346267	-1.31184	0.275645	-1.40021	16.693	33.6732	1.15316	0.332309	27.6631	39.8588	9.79787	1
296	MAL8P1.92	MAL8P1.92_v7.1_P4/4	ATPase, putative	PF3D7_0814300	MAL8P1.92				Pf3D7_08_v3:690,541..694,143(-)	AAA family ATPase, putative	7.10738e-14	1.69841e-09	3.81617e-08	0.905495	1.01783	0.0101472	1.49503	0.00431975	1.57104	0.0319979	1.39143	8.81099e-05	1.9291	0.249634	1.18888	0.577909	-1.09278	35.7537	19.4841	66.2986	5.16137	16.1246	6.27653	2.64692	1
3179	MAL8P1.93	MAL8P1.93_v7.1_P1/1	conserved Plasmodium protein, unknown function	PF3D7_0814100	MAL8P1.93				Pf3D7_08_v3:682,518..683,572(-)	conserved Plasmodium protein, unknown function	0.0449698	0.00534685	0.172345	0.00278955	-2.6104	0.00544688	-2.41944	0.0751696	-1.72686	0.160528	-1.53259	0.271169	-1.395	0.43551	1.26472	0.00536132	-2.57667	2.35388	5.2072	8.85649	2.79888	1.6546	2.61449	10.7449	1
3491	MAL8P1.95	MAL8P1.95_v7.1_P1/1	conserved Plasmodium protein, unknown function	PF3D7_0813300	MAL8P1.95				Pf3D7_08_v3:656,078..657,630(+)	conserved Plasmodium protein, unknown function	1.01471e-08	0.00680369	1.37182e-07	0.00103182	-2.46042	0.0906209	-1.54781	0.000527009	-2.61285	0.981949	1.00573	0.665882	1.11545	0.049697	-1.66606	0.000194455	-3.06495	14.9237	23.451	8.30503	1.86436	14.4024	16.1656	7.63249	1
2629	MAL8P1.96	MAL8P1.96_v7.1_P1/1	CS domain protein, putative	PF3D7_0813200	MAL8P1.96				Pf3D7_08_v3:651,417..652,804(-)	CS domain protein, putative	2.42579e-11	0.0010535	1.0339e-08	0.161225	1.31021	0.311891	-1.21368	0.00572881	-1.74433	0.59982	-1.10508	0.0718323	-1.41983	0.671076	1.08417	0.230156	1.27945	23.7266	21.0909	12.8302	1.62928	18.019	11.4409	4.31758	1
3755	malmito_rna_1:rRNA	malmito_rna_1:rRNA_v6.4_P1/1	mitochondrial rRNA	malmito_rna_1	malmito_rna_1:rRNA				Pf_M76611:506..593(-)	unspecified product	1.03671e-06	7.80513e-11	6.96424e-05	0.107915	-1.54106	0.0380245	-1.76015	3.16157e-05	-3.51113	0.00235654	-2.36541	0.0029089	-2.31711	0.00116074	-2.53199	0.000131121	-3.34511	9.97794	17.0965	85.9578	21.0405	7.60288	9.30503	8.3224	1
2389	malmito_rna_10:rRNA	malmito_rna_10:rRNA_v6.4_P1/1	mitochondrial rRNA	malmito_rna_10	malmito_rna_10:rRNA				Pf_M76611:625..724(-)	unspecified product	0.00108104	1.88866e-08	0.000243328	0.0362146	-1.88109	0.309967	-1.34801	0.00110388	-2.8093	0.00209158	-2.62537	0.00315145	-2.51138	0.0106075	-2.18936	0.000938478	-3.07213	4.58311	9.6095	53.2361	15.9459	6.49993	9.73468	10.1841	1
1714	malmito_rna_LSUF:rRNA	malmito_rna_LSUF:rRNA_v6.4_P1/1	mitochondrial rRNA	malmito_rna_LSUF	malmito_rna_LSUF:rRNA				Pf_M76611:1,516..1,630(+)	unspecified product	2.07274e-06	5.03637e-13	0.000482382	0.0652971	-1.74944	0.00233066	-2.62843	1.83804e-05	-4.31235	0.00199548	-2.67325	3.60636e-05	-4.03483	1.52311e-05	-4.39284	1.37806e-05	-4.9169	9.34337	20.1201	126.964	39.0579	5.92701	9.11663	10.4594	1
2199	malmito_rna_LSUG:rRNA	malmito_rna_LSUG:rRNA_v6.4_P1/1	mitochondrial rRNA	malmito_rna_LSUG	malmito_rna_LSUG:rRNA				Pf_M76611:283..389(-)	unspecified product	9.36672e-11	6.16077e-12	1.502e-08	0.0307729	-1.58187	0.000286748	-2.27637	5.03116e-08	-4.12138	0.0237765	-1.61871	0.12123	-1.38185	0.00417181	-1.86832	0.00163213	-2.10557	21.4793	22.2145	105.081	15.5255	17.4625	12.9002	5.02341	1
3290	malmito_rna_RNA4:rRNA	malmito_rna_RNA4:rRNA_v6.4_P1/1	mitochondrial rRNA	malmito_rna_RNA4	malmito_rna_RNA4:rRNA				Pf_M76611:4,625..4,696(+)	unspecified product	4.69603e-09	5.98929e-08	1.24475e-06	0.824796	1.0729	0.148775	-1.59355	0.000257203	-3.62143	0.0208609	-2.1474	0.096	-1.71596	0.075502	-1.78295	0.0063503	-2.66663	15.883	39.4621	47.6091	16.8982	11.7162	20.7926	12.0678	1
2517	malmito_rna_RNA5:rRNA	malmito_rna_RNA5:rRNA_v6.4_P1/1	mitochondrial rRNA	malmito_rna_RNA5	malmito_rna_RNA5:rRNA				Pf_M76611:4,716..4,802(+)	unspecified product	6.03815e-07	1.36812e-10	0.000129919	0.176284	-1.43417	0.0204111	-1.88726	2.16514e-05	-3.61556	0.00116144	-2.52452	0.0131926	-1.97961	0.00199249	-2.39772	8.9137e-05	-3.45747	10.4906	17.863	82.1039	19.9719	7.04385	8.56715	8.27056	1
3872	malmito_rna_RNA7:rRNA	malmito_rna_RNA7:rRNA_v6.4_P1/1	mitochondrial rRNA	malmito_rna_RNA7	malmito_rna_RNA7:rRNA				Pf_M76611:5,202..5,283(-)	unspecified product	0.00520691	2.50832e-13	0.000322062	0.00064465	-2.80533	0.000605364	-2.82256	1.83184e-05	-3.92208	0.00148668	-2.58299	4.67141e-05	-3.59719	8.67898e-07	-5.18793	6.50771e-09	-9.48771	3.60569	6.7862	133.652	35.9349	6.26274	8.41928	9.14154	1
3131	malmito_rna_SSUF:rRNA	malmito_rna_SSUF:rRNA_v6.4_P1/1	mitochondrial rRNA	malmito_rna_SSUF	malmito_rna_SSUF:rRNA				Pf_M76611:5,447..5,507(-)	unspecified product	2.56924e-08	1.68512e-13	5.77493e-06	0.201999	-1.38526	0.00800174	-2.02544	1.23243e-05	-3.59761	9.03033e-05	-3.04077	0.000506441	-2.6186	5.49944e-06	-3.84895	1.20214e-06	-4.83942	13.8224	21.6607	137.594	30.8028	10.0371	11.2349	7.61149	1
832	malmito_SSUB:rRNA	malmito_SSUB:rRNA_v6.4_P1/1	mitochondrial rRNA	malmito_SSUB	malmito_SSUB:rRNA				Pf_M76611:390..505(-)	unspecified product	4.49549e-11	2.96089e-10	2.42404e-09	0.829644	1.06087	0.0835151	-1.62565	6.98461e-07	-5.2291	0.00685719	-2.19136	0.00936859	-2.11848	0.0171557	-1.97974	0.00588833	-2.35391	22.6784	42.0669	77.007	20.4061	20.2986	26.8947	9.00967	1
475	ncRNA_thermreg	NCRNA_THERMREG_v7.1_P1/3	ncRNA	?	?	?	?	?	?	?	2.4146e-08	0.0654141	5.20513e-05	0.300695	1.36728	0.126087	-1.59487	0.835599	1.06423	0.802984	-1.07772	0.000560198	3.10596	0.00141769	2.81267	0.00243784	2.83475	13.8942	30.7462	3.62486	1.14591	7.87048	12.4404	10.7483	1
3033	PF02TR002	PF02TR002_v7.1_P1/1	product unspecified	PF3D7_0211000	PF02TR002				Pf3D7_02_v3:443,824..444,608(+)	unspecified product	0.0111895	0.00431509	0.000498648	0.00336757	-1.86837	0.102539	-1.39462	0.84427	1.04002	0.438556	1.16811	0.0208434	1.61678	4.92528e-05	2.51164	0.133835	1.3847	3.15232	3.09414	9.35539	1.31182	5.89976	4.13634	4.7675	1
2557	PF03TR002	PF03TR002_v7.1_P1/1	product unspecified	PF3D7_0302400	PF03TR002				Pf3D7_03_v3:132,332..133,502(-)	unspecified product	1.82903e-09	3.1378e-19	0.000411343	3.54978e-12	-15.1565	8.63755e-12	-13.8309	8.45826e-10	-8.83813	1.74485e-09	-8.26098	2.21075e-08	-6.55516	3.73148e-05	-3.42288	1.13964e-09	-9.97122	17.1168	28.819	337.593	81.199	6.05856	7.28612	8.17779	1
2469	PF07_0004	PF07_0004_v7.1_P3/3	Plasmodium exported protein, unknown function	PF3D7_0701900	PF07_0004				Pf3D7_07_v3:79,890..82,943(-)	Plasmodium exported protein, unknown function	4.22894e-12	0.00289265	3.6674e-13	0.0376933	-2.38289	0.821775	-1.09543	0.462487	1.34768	0.158721	1.78352	0.00373386	-3.49125	2.56979e-06	-9.60586	0.00323056	-3.89675	26.9083	108.344	10.3068	5.92849	39.1471	112.587	19.5568	1
993	PF07_0005	PF07_0005_v7.1_P1/2	lysophospholipase, putative	PF3D7_0702200	PF07_0005				Pf3D7_07_v3:91,867..93,141(-)	lysophospholipase, putative	8.92859e-11	0.181283	3.69874e-11	0.389273	-1.35193	0.871288	-1.05807	0.217002	1.54484	0.351197	1.38656	0.439443	-1.31061	4.24836e-05	-5.07079	0.191632	-1.63631	21.556	64.3626	1.86266	0.794514	28.0627	59.8505	14.5026	1
2813	PF07_0006	PF07_0006_v7.1_P2/2	sporozoite threonine and asparagine-rich protein	PF3D7_0702300	PF07_0006				Pf3D7_07_v3:96,761..98,730(+)	sporozoite threonine and asparagine-rich protein	1.58183e-10	0.815545	1.32236e-08	0.504951	-1.44181	0.385791	1.61133	0.0704213	2.75719	0.64124	1.29084	0.150218	-2.22392	0.00978758	-4.42015	0.103515	-2.64086	20.6542	152.094	0.05527	0.0581425	17.6509	92.8415	35.7671	1
1326	PF07_0007	PF07_0007_v7.1_P1/1	conserved Plasmodium protein, unknown function	PF3D7_0702400	PF07_0007				Pf3D7_07_v3:101,694..102,285(+)	small exported membrane protein 1	1.50511e-12	0.269198	1.71304e-08	0.0882538	-1.51621	0.139036	-1.43227	0.942886	1.01726	0.0620647	1.58019	0.788519	1.06621	0.61576	-1.12763	0.0053593	-2.12601	28.9488	40.6628	1.2617	0.253178	17.2694	17.3267	6.82256	1
3233	PF07_0008	PF07_0008_v7.1_P1/1	Plasmodium exported protein, unknown function	PF3D7_0702500	PF07_0008				Pf3D7_07_v3:104,957..105,989(-)	Plasmodium exported protein, unknown function	4.05284e-11	0.11812	1.948e-08	0.270882	-1.40151	0.657139	-1.14459	0.514632	1.2197	0.0105983	2.26088	0.379835	1.3078	0.576378	-1.18546	0.00226313	-2.89978	22.8519	51.9127	2.57055	0.834218	17.0821	27.7182	11.034	1
2754	PF07_0009	PF07_0009_v7.1_P1/1	chitinase precursor fragment, truncated	PF3D7_0702600	PF07_0009				Pf3D7_07_v3:109,915..110,178(+)	chitinase precursor fragment, truncated	4.22929e-11	0.00666938	2.23404e-09	0.0404777	1.8204	0.00801806	2.20822	0.00423959	2.36808	0.0677437	1.70001	0.10111	-1.60628	0.0339765	-1.86148	0.867828	1.0517	22.7804	44.9996	8.35029	2.3564	20.4327	28.83	9.59461	1
51	PF07_0012	PF07_0012_v7.1_P2/5	conserved Plasmodium protein, unknown function	PF3D7_0703200	PF07_0012				Pf3D7_07_v3:122,513..127,135(-)	conserved Plasmodium protein, unknown function	1.55011e-08	0.0184333	0.000195799	0.584377	1.17154	0.336643	-1.32232	0.633631	-1.14783	0.222076	-1.42842	0.433549	-1.25508	0.386942	1.28563	0.930096	-1.02745	14.414	29.5862	6.12958	1.79736	6.68625	9.80297	9.96974	1
1404	PF07_0015	PF07_0015_v7.1_P1/4	tRNA m5C-methyltransferase, putative	PF3D7_0704200	PF07_0015				Pf3D7_07_v3:191,309..194,890(-)	tRNA m5C-methyltransferase, putative	1.42294e-11	5.37683e-09	8.12397e-10	0.0217005	-1.50883	0.266086	1.21324	0.0761151	1.36716	0.0479265	1.42019	5.29565e-06	2.51425	9.18976e-06	2.43637	0.921447	-1.01832	24.664	18.0014	59.8163	6.23685	22.1486	11.5468	3.54507	1
1139	PF07_0016	PF07_0016_v7.1_P5/6	conserved Plasmodium membrane protein, unknown function	PF3D7_0704300	PF07_0016				Pf3D7_07_v3:197,691..203,249(+)	conserved Plasmodium membrane protein, unknown function	1.24788e-13	0.0197811	2.1782e-12	0.00158815	2.45446	0.0140856	1.96805	0.267435	-1.34301	0.00114048	-2.53306	0.0456413	-1.72066	0.791406	1.07222	0.122917	1.55638	34.4058	58.7943	5.98213	1.46037	34.5084	42.1212	8.30014	1
1907	PF07_0017	PF07_0017_v7.1_P2/3	phosphoinositide-binding protein, putative	PF3D7_0704400	PF07_0017				Pf3D7_07_v3:204,718..207,750(+)	phosphoinositide-binding protein, putative	2.24378e-11	0.312007	6.14651e-05	5.49507e-05	2.02774	0.200418	1.22175	0.537225	1.10034	0.245958	-1.19853	0.382495	-1.14536	0.408446	1.13699	0.0123799	1.54215	23.8619	14.0233	1.05325	0.0884258	7.71716	3.23948	2.85448	1
1479	PF07_0018	PF07_0018_v7.1_P4/4	conserved Plasmodium membrane protein, unknown function	PF3D7_0704700	PF07_0018				Pf3D7_07_v3:233,401..237,414(+)	phosphopantetheine adenylyltransferase, putative	0.00223148	0.00616851	4.0816e-06	0.29949	1.09545	0.00862365	1.2728	0.00578605	1.29025	0.184988	-1.12419	0.719193	-1.03187	0.0894716	1.16329	0.00539839	1.31643	4.12409	0.771129	8.52814	0.227801	10.4041	1.38956	0.908197	1
533	PF07_0019	PF07_0019_v7.1_P1/4	conserved Plasmodium protein, unknown function	PF3D7_0704800	PF07_0019				Pf3D7_07_v3:238,159..242,052(-)	protein phosphatase PPM12, putative	1.78131e-13	0.0496661	8.2331e-14	0.0155902	1.80098	0.000129361	2.71151	0.566673	-1.14304	0.0307873	-1.68321	0.025365	-1.71668	0.0342017	-1.66503	0.861374	1.04442	33.5762	44.7729	4.1428	0.789189	43.4284	41.3647	6.47687	1
398	PF07_0020	PF07_0020_v7.1_P4/4	methyltransferase, putative	PF3D7_0705000	PF07_0020				Pf3D7_07_v3:246,259..250,152(-)	mRNA cap guanine-N7 methyltransferase, putative	3.90323e-06	1.07299e-06	0.000829801	0.304357	-1.24526	0.0571901	1.51294	0.0117063	1.75137	0.306519	1.24402	0.00537394	1.86919	0.00608804	1.85019	0.168513	1.37211	8.78489	9.70606	35.1227	5.54366	5.48711	4.33034	5.36645	1
1795	PF07_0021	PF07_0021_v7.1_P3/3	conserved Plasmodium protein, unknown function	PF3D7_0705100	PF07_0021				Pf3D7_07_v3:252,282..255,251(+)	conserved Plasmodium protein, unknown function	4.20208e-13	0.000270505	9.27273e-13	0.0117382	2.03229	0.509812	1.19408	0.0674127	1.65375	4.97314e-05	-3.44215	1.1939e-05	-3.91093	0.57706	-1.16176	0.721643	1.10767	31.6454	56.0375	16.505	4.17528	36.6715	46.384	8.601	1
2471	PF07_0024	PF07_0024_v7.1_P1/8	inositol phosphatase, putative	PF3D7_0705500	PF07_0024				Pf3D7_07_v3:270,022..278,706(-)	inositol-phosphate phosphatase, putative	2.68576e-14	5.51397e-09	2.30588e-14	0.0374005	1.29304	1.50101e-05	1.81951	1.86134e-08	2.37795	0.0165855	1.34853	0.140681	-1.19597	0.511935	1.08181	0.331852	1.13299	38.1918	13.4267	59.6795	2.99727	47.3839	11.8987	1.70757	1
3616	PF07_0025	PF07_0025_v7.1_P1/1	conserved Plasmodium protein, unknown function	PF3D7_0707600	PF07_0025				Pf3D7_07_v3:353,986..354,720(+)	conserved Plasmodium protein, unknown function	5.90208e-05	0.0339931	0.0352738	0.671595	-1.07732	0.872818	-1.02849	0.325293	1.18983	0.572039	1.10447	0.210962	1.24861	0.872983	1.02845	0.492375	-1.13793	6.59868	4.99811	4.88093	0.528144	2.73142	1.47778	3.679	1
2174	PF07_0026	PF07_0026_v7.1_P3/3	ubiquitin-protein ligase e3, putative	PF3D7_0707700	PF07_0026				Pf3D7_07_v3:357,700..360,585(+)	E3 ubiquitin-protein ligase, putative	0.00122963	0.60331	6.78097e-06	0.779919	-1.04279	0.837044	1.03131	0.247553	1.19126	0.497335	1.10744	0.25536	1.1878	0.0414444	-1.37061	0.0356498	-1.41612	4.50041	2.48723	0.275137	0.0217228	9.86964	3.89617	2.68439	1
1010	PF07_0027	PF07_0027_v7.1_P1/1	DNA-directed RNA polymerase 2 8.2 kDa polypeptide, putative	PF3D7_0708100	PF07_0027				Pf3D7_07_v3:372,897..373,106(-)	DNA-directed RNA polymerases I, II, and III subunit RPABC5, putative	1.97914e-07	0.935607	0.000150951	0.0183838	-1.80223	0.15749	-1.4102	0.170075	-1.3956	0.210088	1.35498	0.89836	1.03108	0.573458	1.14474	0.00135915	-2.42817	11.5996	16.3835	0.00662486	0.00133672	6.91213	6.97345	6.86032	1
1071	PF07_0029	PF07_0029_v7.1_P2/3	heat shock protein 90	PF3D7_0708400	PF07_0029				Pf3D7_07_v3:381,592..384,614(+)	heat shock protein 90	3.83203e-08	1.16468e-08	2.93643e-08	0.000376712	-1.70345	0.000105585	-1.80752	2.13436e-07	-2.39394	0.0379071	-1.33843	0.0299236	-1.35773	0.0912697	-1.26432	9.11059e-06	-2.12112	13.3664	6.07962	55.7101	3.61993	16.4933	5.3585	2.20925	1
1276	PF07_0030	PF07_0030_v7.1_P1/3	heat shock protein 86 family protein	PF3D7_0708500	PF07_0030				Pf3D7_07_v3:385,583..388,321(-)	heat shock protein 86 family protein	1.46866e-14	0.527843	3.19442e-09	1.38489e-06	-1.86074	0.384848	-1.09811	0.369216	1.10158	0.301393	-1.11802	0.973588	1.00355	0.0607631	1.229	3.37985e-05	-1.72016	39.7755	11.228	0.406854	0.0164069	19.85	4.00237	1.37109	1
1319	PF07_0032	PF07_0032_v7.1_P1/1	Cg8 protein	PF3D7_0708700	PF07_0032				Pf3D7_07_v3:391,502..392,188(-)	Cg8 protein	1.64083e-06	0.36938	0.000700986	0.0176576	2.48992	0.203597	1.60668	0.975011	-1.01161	0.92098	-1.03723	0.30803	1.46015	0.39804	1.36763	0.0742394	2.05489	9.55463	31.9295	0.827572	0.395081	5.62261	13.4211	16.2315	1
2678	PF07_0033	PF07_0033_v7.1_P3/3	Cg4 protein	PF3D7_0708800	PF07_0033				Pf3D7_07_v3:395,711..398,332(+)	heat shock protein 110	1.23667e-12	0.0843568	3.1221e-08	0.00961551	-1.37675	0.245518	-1.14761	0.170605	-1.17716	0.935552	-1.00954	0.120517	1.20388	0.336839	1.1202	0.455897	-1.0985	29.351	9.95126	3.16112	0.153108	16.4065	3.97323	1.64678	1
2508	PF07_0034	PF07_0034_v7.1_P1/1	Cg3 protein	PF3D7_0708900	PF07_0034				Pf3D7_07_v3:399,290..400,243(-)	protein SCO1, putative	6.67099e-07	0.992145	3.49422e-06	0.000398726	-1.8758	0.0997027	-1.31139	0.705627	1.06291	0.0270549	-1.44786	0.882902	-1.02405	0.164002	1.25588	0.863985	-1.03	10.3949	6.66081	9.83564e-05	9.00353e-06	10.5708	4.83825	3.11235	1
1016	PF07_0035	PF07_0035_v7.1_P4/4	Cg1 protein	PF3D7_0709100	PF07_0035				Pf3D7_07_v3:408,215..411,961(+)	Cg1 protein	3.66648e-17	4.20983e-05	3.62114e-14	0.00077456	1.99802	0.0717467	1.41683	0.000107462	-2.27314	0.00750717	-1.70394	0.0900199	-1.38696	0.852275	1.0358	0.133626	1.36064	58.9562	51.7451	22.0768	2.76807	45.9472	28.8052	4.26305	1
455	PF07_0037	PF07_0037_v7.1_P6/8	Cg2 protein	PF3D7_0709300	PF07_0037				Pf3D7_07_v3:413,560..421,749(-)	Cg2 protein	1.99495e-13	1.60713e-05	6.33205e-10	2.93567e-05	-1.64759	0.88231	-1.01557	0.0851383	1.20165	0.687617	1.04291	0.00113506	1.44522	0.00151171	1.42971	0.279396	-1.12945	33.3158	8.92932	25.2236	0.96578	22.5871	4.32416	1.30182	1
1633	PF07_0038	PF07_0038_v7.1_P2/4	Cg7 protein	PF3D7_0709400	PF07_0038				Pf3D7_07_v3:423,236..427,234(-)	Cg7 protein	3.5624e-16	0.224988	2.41155e-14	1.00494e-05	2.88902	0.0220196	1.63492	0.0198782	-1.64965	0.0116592	-1.72651	0.831383	-1.04493	0.0302408	1.58919	0.00299399	2.01409	50.8746	53.3126	1.52731	0.228643	47.2396	35.3596	5.08991	1
3212	PF07_0040	PF07_0040_v7.1_P2/2	lysophospholipase, putative	PF3D7_0709700	PF07_0040				Pf3D7_07_v3:435,089..436,195(-)	prodrug activation and resistance esterase	6.03914e-06	0.340138	5.30264e-06	0.272043	1.2882	0.0489266	1.58926	0.0236033	1.71184	0.228252	-1.3209	0.632714	-1.11559	0.65251	1.10854	0.0463858	1.65084	8.41113	10.8083	0.93601	0.171824	10.1266	9.29479	6.24141	1
1079	PF07_0041	PF07_0041_v7.1_P1/2	conserved Plasmodium protein, unknown function	PF3D7_0710100	PF07_0041				Pf3D7_07_v3:460,057..461,436(+)	conserved Plasmodium protein, unknown function	0.00522081	0.01451	0.203259	2.36912e-05	-3.06028	0.161141	-1.38751	0.651459	1.10983	0.0750071	-1.52186	0.00666624	-1.93619	0.638044	1.11464	0.00396329	-2.12877	3.60408	4.70549	6.63622	1.23775	1.54122	1.4373	6.34148	1
659	PF07_0042	PF07_0042_v7.1_P9/9	conserved Plasmodium protein, unknown function	PF3D7_0710200	PF07_0042				Pf3D7_07_v3:463,105..471,837(+)	conserved Plasmodium protein, unknown function	3.02323e-11	0.000567111	4.82435e-07	0.0760454	1.46233	0.867126	1.03563	0.437384	-1.17728	0.021608	-1.64889	0.0652207	-1.48542	0.902494	-1.02596	0.835431	1.04757	23.3482	25.1514	14.4639	2.22586	12.8292	9.87144	5.23227	1
1060	PF07_0043	PF07_0043_v7.1_P1/1	60S ribosomal protein L34a, putative	PF3D7_0710600	PF07_0043				Pf3D7_07_v3:478,468..479,138(-)	60S ribosomal protein L34	0.0154675	4.89692e-06	0.124776	0.00317725	-3.6798	0.0077091	-3.19721	0.00148025	-4.13362	0.193208	-1.72409	0.0858982	-2.0664	0.0123979	-2.95557	0.000448803	-5.49883	2.96398	12.4649	29.3713	17.6457	1.87453	5.63092	20.4266	1
1616	PF07_0044	PF07_0044_v7.1_P1/1	conserved Plasmodium protein, unknown function	PF3D7_0710700	PF07_0044				Pf3D7_07_v3:481,369..481,974(-)	conserved Plasmodium protein, unknown function	1.02666e-12	0.19331	2.08995e-06	0.000532243	-1.94287	0.133	-1.30634	0.0495093	-1.42422	0.15755	-1.28519	0.791515	1.04734	0.317502	-1.1926	0.000219954	-2.15401	29.7363	22.386	1.76127	0.189416	11.1328	5.98638	3.65654	1
206	PF07_0045	PF07_0045_v7.1_P2/2	conserved Plasmodium protein, unknown function	PF3D7_0710800	PF07_0045				Pf3D7_07_v3:482,701..483,831(-)	conserved Plasmodium protein, unknown function	1.02304e-08	5.95898e-10	5.69486e-06	0.684306	1.05566	0.00340326	1.51581	0.00138399	1.58416	0.300322	1.14904	0.0288453	1.35184	9.57166e-06	1.9863	0.0226553	1.40096	14.9137	6.49864	72.5862	4.51848	10.0517	3.12858	2.11649	1
1511	PF07_0046	PF07_0046_v7.1_P2/2	mitochondrial ribosomal protein L1 precursor, putative	PF3D7_0710900	PF07_0046				Pf3D7_07_v3:484,838..486,037(+)	50S ribosomal protein L1, mitochondrial, putative	0.00354145	5.42865e-05	0.000848757	0.0294653	1.59122	0.0385861	1.55236	0.0765999	1.4524	0.992715	1.00188	0.0670988	1.47189	0.00409404	1.87606	0.106058	1.43722	3.83922	4.00456	21.2765	3.1704	5.46905	4.0747	5.06631	1
885	PF07_0047	PF07_0047_v7.1_P4/4	AAA family ATPase, CDC48 subfamily	PF3D7_0711000	PF07_0047				Pf3D7_07_v3:487,281..490,970(-)	AAA family ATPase, CDC48 subfamily	3.86225e-12	7.56149e-07	1.6295e-10	0.0116853	-1.74046	2.17559e-05	-2.78191	0.0016437	-2.03629	0.106139	-1.41216	0.250373	-1.27526	0.299011	1.24519	0.0349116	-1.62973	27.0825	29.2431	36.5247	5.63408	25.0907	19.3517	5.24463	1
1400	PF07_0048	PF07_0048_v7.1_P4/7	erythrocyte membrane protein 1, PfEMP1	PF3D7_0711700	PF07_0048				Pf3D7_07_v3:511,950..519,425(-)	erythrocyte membrane protein 1, PfEMP1	1.73645e-07	0.118119	3.32849e-05	0.0066626	-4.32713	0.0843629	-2.4625	0.602391	-1.30545	0.696625	-1.22055	0.342207	-1.62948	0.82242	1.12147	0.000388768	-8.43887	11.7343	75.2985	2.57058	2.35646	8.28988	37.9968	31.168	1
1938	PF07_0050	PF07_0050_v7.1_P3/6	erythrocyte membrane protein 1, PfEMP1	PF3D7_0712400	PF07_0050				Pf3D7_07_v3:552,158..559,078(-)	erythrocyte membrane protein 1, PfEMP1	0.000535147	1.5278e-06	6.14748e-07	0.000659071	-1.77439	3.74706e-07	-2.61236	0.614445	-1.08085	0.420725	1.13274	0.0366654	-1.39465	0.0173947	-1.46574	0.0128848	-1.53599	5.04371	2.94613	33.7366	2.81517	12.5388	5.23155	2.83715	1
3643	PF07_0052	PF07_0052_v7.1_P1/1	conserved Plasmodium protein, unknown function	PF3D7_0713800	PF07_0052				Pf3D7_07_v3:624,379..625,300(-)	negative elongation factor A, putative	9.83923e-14	1.36119e-05	3.68285e-14	0.0422589	1.70183	0.0206793	1.84309	0.894003	1.0344	0.000736283	-2.54676	1.42152e-05	-3.58122	0.00159393	-2.3739	0.230134	-1.38974	34.9694	55.4411	25.7854	5.84009	45.8942	51.9724	7.70059	1
304	PF07_0053	PF07_0053_v7.1_P5/11	conserved Plasmodium protein, unknown function	PF3D7_0713900	PF07_0053				Pf3D7_07_v3:627,067..637,776(-)	conserved Plasmodium protein, unknown function	1.30025e-09	0.991578	7.27352e-07	0.000273731	-1.64522	0.104972	-1.2267	0.498581	-1.08754	0.366159	-1.11891	0.648029	-1.05813	0.107262	1.225	0.929262	-1.0118	17.5803	6.6078	0.000113062	6.07087e-06	12.3397	3.31289	1.82563	1
3799	PF07_0054	PF07_0054_v7.1_P1/1	histone H2B variant, putative	PF3D7_0714000	PF07_0054				Pf3D7_07_v3:643,101..643,472(-)	histone H2B variant	5.70784e-06	1.50663e-15	4.99041e-07	3.56323e-06	-3.20772	1.90164e-05	-2.8505	0.00383347	-1.92461	4.17652e-05	-2.69574	9.91368e-10	-5.80247	1.51137e-06	-3.40742	7.76576e-08	-4.64587	8.45894	9.40055	192.109	30.4992	12.7884	10.1514	5.39782	1
2864	PF07_0056	PF07_0056_v7.1_P2/4	conserved Plasmodium protein, unknown function	PF3D7_0714200	PF07_0056				Pf3D7_07_v3:650,834..654,919(+)	conserved Plasmodium protein, unknown function	0.000495757	0.0714	4.90116e-05	0.315651	1.18929	0.0301814	1.46974	0.0159975	1.53967	0.647364	1.08173	0.54628	-1.10931	0.420971	-1.14873	0.923656	-1.01772	5.09475	3.68678	3.46357	0.358055	7.92632	4.09702	3.51483	1
1270	PF07_0058	PF07_0058_v7.1_P1/2	conserved Plasmodium protein, unknown function	PF3D7_0714600	PF07_0058				Pf3D7_07_v3:667,985..669,712(+)	conserved Plasmodium protein, unknown function	0.0202671	0.848476	0.990014	0.648385	-1.27892	0.858955	1.10048	0.518309	-1.4177	0.829446	-1.12308	0.78236	-1.16054	0.8828	-1.08266	0.0122497	-4.53809	2.80812	20.0541	0.0370659	0.0378149	0.107025	0.545938	34.6871	1
3428	PF07_0059	PF07_0059_v7.1_P1/1	4-nitrophenylphosphatase	PF3D7_0715000	PF07_0059				Pf3D7_07_v3:673,451..674,419(+)	4-nitrophenylphosphatase	2.70661e-10	9.92757e-08	0.00017393	0.751492	1.05808	0.0172282	1.55715	0.108599	1.3383	0.222699	1.24564	0.0225107	1.52611	0.00184108	1.81746	0.565492	-1.11596	19.8343	15.4915	45.2642	5.0505	6.7887	3.78735	3.79366	1
3523	PF07_0060	PF07_0060_v7.1_P1/1	conserved Plasmodium protein, unknown function	PF3D7_0715100	PF07_0060				Pf3D7_07_v3:674,610..675,130(-)	C-Myc-binding protein, putative	5.55778e-10	0.000214455	9.85419e-12	0.886992	1.04298	0.0874847	1.67727	0.0346072	1.9098	0.106043	-1.62908	1.53644e-06	-5.51048	0.00748961	-2.30689	0.0317764	-2.02116	18.7753	40.5124	17.1654	5.29121	30.9403	47.6867	10.4805	1
1202	PF07_0061	PF07_0061_v7.1_P3/7	conserved Plasmodium protein, unknown function	PF3D7_0715200	PF07_0061				Pf3D7_07_v3:676,061..682,681(-)	conserved Plasmodium protein, unknown function	6.65039e-08	0.0053337	2.00521e-06	0.725264	1.13276	0.474603	1.28963	0.976177	1.01064	0.0124988	-2.52919	0.0504575	-2.04096	0.736034	-1.12701	0.820794	-1.08965	12.7545	39.4243	8.86217	3.9133	11.1787	24.6812	15.0135	1
1874	PF07_0062	PF07_0062_v7.1_P3/3	GTP-binding translation elongation factor tu family protein, putative	PF3D7_0715600	PF07_0062				Pf3D7_07_v3:691,068..693,332(+)	GTP-binding translation elongation factor tu family protein, putative	5.83217e-12	0.416914	2.24821e-09	0.0236724	2.16665	0.493161	1.25373	0.0226775	-2.17981	0.486195	-1.25836	0.194685	1.54006	0.0613955	1.88038	0.168081	1.63472	26.2981	69.982	0.675363	0.256744	20.4223	38.8185	12.9253	1
2627	PF07_0063	PF07_0063_v7.1_P1/1	conserved Plasmodium protein, unknown function	PF3D7_0715700	PF07_0063				Pf3D7_07_v3:694,523..694,882(+)	conserved Plasmodium protein, unknown function	2.90176e-13	0.00476036	1.75125e-12	1.52179e-05	4.3935	4.91553e-05	3.91309	0.0187942	-2.06388	0.703654	1.11923	0.0278441	1.96357	0.00466212	2.43373	0.000219585	3.66205	32.4665	69.9199	9.12589	2.80765	35.0507	53.9181	10.4603	1
3191	PF07_0064	PF07_0064_v7.1_P1/2	drug/metabolite exporter, drug/metabolite transporter	PF3D7_0715800	PF07_0064				Pf3D7_07_v3:695,600..696,904(-)	drug/metabolite transporter DMT1, putative	2.08511e-15	0.0368206	3.98692e-11	0.00162385	2.33556	0.0664222	-1.59958	0.181035	-1.40248	0.290669	-1.30456	0.523996	1.17289	0.0689981	1.59223	0.00537111	2.19802	45.2988	69.413	4.72306	1.0339	27.9061	30.544	7.44278	1
2888	PF07_0065	PF07_0065_v7.1_P2/2	zinc transporter, putative	PF3D7_0715900	PF07_0065				Pf3D7_07_v3:699,239..700,909(+)	cation diffusion facilitator family protein, putative	5.54146e-17	0.000152314	1.42117e-14	0.000350066	2.66039	0.150785	1.43623	1.96807e-06	-4.09481	0.0243361	-1.78685	0.732702	-1.08851	0.613181	1.13391	0.134065	1.498	57.4068	86.9758	18.1564	3.92976	48.9674	52.9925	7.35895	1
1566	PF07_0066	PF07_0066_v7.1_P3/4	conserved Plasmodium protein, unknown function	PF3D7_0716000	PF07_0066				Pf3D7_07_v3:703,207..706,584(+)	RNA-binding protein, putative	1.87444e-09	2.83169e-07	0.00141433	0.411809	-1.17828	0.000379787	2.17869	0.088196	1.41421	0.321373	1.21979	0.234464	1.26995	0.00135322	1.99227	0.823501	-1.04858	17.0839	16.6321	40.6202	5.64943	5.0663	3.52309	4.7287	1
1085	PF07_0067	PF07_0067_v7.1_P2/4	large ribosomal subunit assembling factor, putative	PF3D7_0716100	PF07_0067				Pf3D7_07_v3:707,699..710,908(-)	protein SDA1, putative	3.10354e-11	0.813593	3.69614e-06	0.112376	-1.48936	0.557213	-1.15592	0.264732	-1.31938	0.726411	1.09006	0.768377	1.07525	0.349815	-1.26075	0.000475782	-2.74538	23.3035	34.7697	0.0564691	0.0120363	10.5104	11.2013	7.24705	1
2983	PF07_0068	PF07_0068_v7.1_P1/2	cysteine desulfurase, putative	PF3D7_0716600	PF07_0068				Pf3D7_07_v3:725,296..727,219(+)	cysteine desulfurase	7.55368e-13	0.906337	1.34943e-08	0.122488	1.44989	0.290326	-1.28652	0.874912	1.0379	0.828179	1.05264	0.111397	1.4672	0.00962635	1.90322	0.221934	1.36612	30.3809	41.7448	0.0140517	0.00275826	17.6209	17.2942	6.67395	1
27	PF07_0069	PF07_0069_v7.1_P2/3	conserved Plasmodium protein, unknown function	PF3D7_0716700	PF07_0069				Pf3D7_07_v3:728,109..731,126(+)	conserved Plasmodium protein, unknown function	4.48868e-13	4.55828e-05	1.56849e-10	0.292705	-1.31249	0.0429401	-1.70757	0.00213154	-2.32987	0.23952	-1.35608	0.526127	1.177	0.83557	1.05466	0.114466	-1.5537	31.501	50.9316	21.8251	5.04107	25.164	29.0613	7.85316	1
2298	PF07_0070	PF07_0070_v7.1_P1/1	drug metabolite transporter, putative	PF3D7_0716900	PF07_0070				Pf3D7_07_v3:736,370..737,338(+)	drug/metabolite transporter DMT2	6.23872e-09	5.91805e-07	2.52197e-06	0.020638	1.53426	0.0404229	1.45599	0.0768459	1.3795	0.0469723	1.43831	0.00114683	1.87039	0.00756834	1.64988	0.306011	1.2164	15.5243	12.0539	37.5241	4.16224	10.9254	6.05933	3.77134	1
974	PF07_0071	PF07_0071_v7.1_P2/3	queuine tRNA-ribosyltransferase, putative	PF3D7_0717400	PF07_0071				Pf3D7_07_v3:751,877..754,132(+)	queuine tRNA-ribosyltransferase, putative	1.00122e-09	0.776437	4.46875e-12	0.0294659	-1.3067	0.613203	-1.06189	0.42781	-1.09906	0.0162493	1.34666	0.000786313	1.54329	0.000611606	-1.55962	0.00255651	-1.50644	17.9415	6.20683	0.0819287	0.00404902	32.7703	8.09775	1.68032	1
3629	PF07_0072	PF07_0072_v7.1_P2/2	calcium dependent protein kinase 4	PF3D7_0717500	PF07_0072				Pf3D7_07_v3:755,763..757,696(+)	calcium-dependent protein kinase 4	9.58394e-10	7.75667e-07	2.60306e-10	0.739542	1.08667	0.90423	-1.03052	0.744151	-1.08502	0.032059	-1.74084	8.58208e-05	-3.02018	0.000689177	-2.52431	0.00131135	-2.5309	18.0024	27.6511	36.4216	7.99176	24.2042	26.5549	7.4604	1
2081	PF07_0073	PF07_0073_v7.1_P1/2	seryl-tRNA synthetase, putative	PF3D7_0717700	PF07_0073				Pf3D7_07_v3:764,794..766,413(-)	serine--tRNA ligase, putative	2.27928e-06	9.52797e-06	7.31085e-08	1.00902e-07	-2.37924	1.43699e-05	-1.92016	0.0320843	-1.33402	0.0562826	-1.29023	0.188749	-1.18879	0.814155	1.03102	0.0107779	-1.4505	9.25829	3.84446	27.0114	1.60234	15.2336	4.51835	2.01691	1
1729	PF07_0075	PF07_0075_v7.1_P2/2	conserved Plasmodium membrane protein, unknown function	PF3D7_0718700	PF07_0075				Pf3D7_07_v3:831,549..832,922(-)	conserved Plasmodium membrane protein, unknown function	6.03842e-14	0.0385644	8.93053e-12	0.636543	1.15877	0.00150765	-2.90597	0.036125	-1.96267	0.932834	-1.02659	0.0798419	1.7472	0.0909744	1.71193	0.023552	2.18874	36.1524	86.2415	4.63219	1.57858	31.1635	53.1002	11.5867	1
1003	PF07_0077	PF07_0077_v7.1_P2/3	actin-like protein, putative	PF3D7_0719300	PF07_0077				Pf3D7_07_v3:844,495..847,593(+)	actin-related protein, putative	1.85062e-07	0.00141271	0.00255883	0.106372	-1.44882	0.180363	1.35759	0.34707	1.23753	0.437229	1.1921	0.329931	1.24723	0.011585	1.81574	0.164186	-1.40458	11.6686	14.56	12.0794	2.15321	4.61115	4.10982	6.0607	1
909	PF07_0078	PF07_0078_v7.1_P2/2	conserved membrane protein, unknown function	PF3D7_0719500	PF07_0078				Pf3D7_07_v3:854,652..856,654(-)	LEM3/CDC50 family protein, putative	2.31408e-12	0.0836739	1.60953e-11	0.000713284	2.48907	0.00150329	2.33037	0.033741	-1.71969	0.00595029	-2.05236	0.284389	-1.30539	0.849618	1.04793	0.131662	1.49876	28.0842	42.1121	3.17572	0.680281	29.8468	31.9679	7.28326	1
3134	PF07_0079	PF07_0079_v7.1_P1/1	60S ribosomal protein L11a, putative	PF3D7_0719600	PF07_0079				Pf3D7_07_v3:858,742..859,492(-)	60S ribosomal protein L11a, putative	0.403825	0.0558194	0.260833	0.0395627	-6.19056	0.109215	-4.05855	0.895116	-1.11976	0.632537	-1.50821	0.287339	-2.51069	0.929122	-1.0793	0.908448	-1.11124	1.06945	19.3733	3.92122	10.1477	1.36761	17.6961	87.9882	1
2327	PF07_0080	PF07_0080_v7.1_P1/1	40S ribosomal protein S10, putative	PF3D7_0719700	PF07_0080				Pf3D7_07_v3:861,583..862,487(+)	40S ribosomal protein S10, putative	4.11685e-05	0.000224941	7.18738e-05	0.297404	-1.34743	0.991415	-1.00306	0.428493	1.25334	0.0179187	2.01582	0.00539619	2.3108	0.0300174	1.89303	0.850479	1.05889	6.87032	13.6255	17.0288	4.82461	7.57415	10.7296	9.63289	1
2466	PF07_0081	PF07_0081_v7.1_P2/2	conserved Plasmodium protein, unknown function	PF3D7_0719800	PF07_0081				Pf3D7_07_v3:863,452..864,813(-)	conserved Plasmodium protein, unknown function	0.000347437	1.54942e-06	0.0102081	0.00204141	-1.88984	0.0155914	-1.62444	0.141256	-1.33242	0.127885	-1.3463	0.0547421	-1.46095	0.278498	-1.23349	0.0598222	-1.4868	5.33467	4.83771	33.6821	4.36349	3.59588	2.32922	4.40467	1
135	PF07_0082	PF07_0082_v7.1_P5/10	conserved Plasmodium membrane protein, unknown function	PF3D7_0719900	PF07_0082				Pf3D7_07_v3:865,927..876,132(+)	conserved Plasmodium membrane protein, unknown function	4.8218e-05	0.00022442	4.02068e-07	1.8788e-06	-1.70512	0.111297	-1.16418	0.123751	1.15807	0.000881374	-1.40356	0.00449622	-1.32701	0.974781	1.00297	0.01034	-1.30978	6.75048	1.45762	17.0354	0.525491	13.0502	2.01279	1.0488	1
3466	PF07_0083	PF07_0083_v7.1_P1/1	small subunit rRNA processing protein, putative	PF3D7_0720100	PF07_0083				Pf3D7_07_v3:877,865..878,632(-)	small subunit rRNA processing protein, putative	0.356652	0.00884381	0.748731	0.0530241	-6.46562	0.170557	-3.68258	0.838226	-1.21114	0.0712911	-5.66084	0.110461	-4.59968	0.920843	-1.0977	0.0249967	-10.3227	1.14966	24.8947	7.71604	23.8691	0.534361	8.26506	105.177	1
2098	PF07_0084	PF07_0084_v7.1_P1/1	conserved Plasmodium protein, unknown function	PF3D7_0720200	PF07_0084				Pf3D7_07_v3:879,454..879,946(+)	conserved Plasmodium protein, unknown function	3.59991e-07	0.0733329	3.32062e-05	0.00184917	-1.82732	0.0620542	-1.41122	0.0110653	-1.61569	0.69135	1.0741	0.727569	1.06471	0.987367	-1.00285	8.22315e-06	-2.72177	10.996	8.75298	3.4147	0.388307	8.29213	4.71474	3.86635	1
1664	PF07_0085	PF07_0085_v7.1_P2/2	ferrodoxin reductase-like protein	PF3D7_0720400	PF07_0085				Pf3D7_07_v3:882,936..884,988(+)	ferrodoxin reductase-like protein	6.07121e-09	0.960356	4.49541e-09	0.00315717	-1.78911	0.0169828	-1.58342	0.633621	-1.09205	0.893747	1.02494	0.0844165	1.38463	0.0043844	1.74866	0.518934	1.13605	15.5584	13.0244	0.00250748	0.000299869	19.3044	11.543	4.06606	1
353	PF07_0086	PF07_0086_v7.1_P7/10	conserved Plasmodium membrane protein, unknown function	PF3D7_0721000	PF07_0086				Pf3D7_07_v3:904,143..914,671(+)	conserved Plasmodium membrane protein, unknown function	4.81669e-11	9.98261e-05	3.1099e-06	0.418428	-1.06987	0.154335	-1.12763	0.131421	-1.13593	0.108287	-1.14567	0.118985	-1.14096	0.181613	1.11901	0.868557	-1.01481	22.5635	3.83109	19.41	0.470808	10.6968	1.2973	0.824704	1
562	PF07_0087	PF07_0087_v7.1_P1/1	conserved Plasmodium protein, unknown function	PF3D7_0721100	PF07_0087				Pf3D7_07_v3:916,434..917,168(+)	conserved Plasmodium protein, unknown function	3.76439e-16	0.644411	1.6616e-13	7.54745e-07	3.66382	0.0114334	-1.77621	0.182268	-1.33981	0.709251	1.08413	0.146914	1.37562	0.0134501	1.75098	0.0025341	2.11429	50.6917	58.4357	0.216862	0.035713	41.3692	34.0636	5.59915	1
3630	PF07_0088	PF07_0088_v7.1_P1/1	40S ribosomal protein S5, putative	PF3D7_0721600	PF07_0088				Pf3D7_07_v3:931,459..932,164(-)	40S ribosomal protein S5, putative	7.84664e-09	0.0413646	2.7544e-06	0.145604	-1.38594	0.45405	-1.18053	0.70476	-1.08734	0.00707358	1.87416	0.73478	1.07772	0.366135	1.22229	0.609482	-1.12838	15.239	18.2776	4.49533	0.770238	10.8289	9.27719	5.82562	1
2878	PF07_0090	PF07_0090_v7.1_P1/1	conserved Plasmodium protein, unknown function	PF3D7_0722000	PF07_0090				Pf3D7_07_v3:941,776..942,513(+)	conserved Plasmodium protein, unknown function	0.0092068	0.000702777	0.287651	0.0155317	1.59777	0.118548	1.34251	0.580629	1.10805	0.620572	1.09625	0.213941	1.26231	0.258242	1.23551	0.00438764	1.82241	3.26672	2.76021	13.8906	1.67669	1.29847	0.783669	4.10403	1
126	PF07_0090a	PF07_0090A_v7.1_P1/1	conserved Plasmodium protein, unknown function	PF3D7_0721900	PF07_0090a				Pf3D7_07_v3:939,715..940,250(-)	V-type ATPase V0 subunit e, putative	0.00212305	1.79377e-07	0.049989	1.25887e-05	2.40819	0.000407159	1.96397	0.00234621	1.76171	0.0992288	1.33891	0.0481203	1.42336	0.871812	1.02839	0.000452675	2.04361	4.15515	3.07707	42.6074	4.50752	2.49377	1.3191	3.59693	1
1209	PF07_0091	PF07_0091_v7.1_P1/1	cell cycle control protein cwf15, putative	PF3D7_0722500	PF07_0091				Pf3D7_07_v3:956,920..958,017(-)	pre-mRNA-splicing factor CWC15, putative	3.64847e-08	0.0189867	0.000630495	0.0122233	-1.31938	0.535399	-1.06776	0.336183	-1.10755	0.150766	-1.16641	0.131918	-1.17545	0.0668457	-1.21929	0.00470069	-1.40315	13.4218	3.67591	6.06766	0.237398	5.70833	1.1167	1.33026	1
1546	PF07_0092	PF07_0092_v7.1_P1/2	nucleolar rRNA processing protein, putative	PF3D7_0722600	PF07_0092				Pf3D7_07_v3:958,886..960,694(-)	U3 small nucleolar RNA-associated protein 7, putative	5.21389e-15	0.0222174	1.74836e-09	1.27361e-05	-1.57681	0.236511	-1.1136	0.521159	-1.05959	0.667955	-1.03939	0.690944	-1.03645	2.84073e-05	-1.53938	2.45804e-05	-1.5933	42.6267	8.48861	5.74137	0.163332	20.8393	2.96421	0.967242	1
481	PF07_0093	PF07_0093_v7.1_P1/1	conserved Plasmodium protein, unknown function	PF3D7_0722700	PF07_0093				Pf3D7_07_v3:962,031..962,447(+)	conserved Plasmodium protein, unknown function	3.97005e-06	3.8645e-06	0.0294223	0.654963	1.10105	0.0093587	-1.80081	0.0123693	-1.75782	0.0669446	-1.49795	0.13674	-1.38459	0.096381	-1.44066	0.871362	1.03794	8.77018	9.9856	30.234	4.91771	2.85581	2.32256	5.53027	1
1235	PF07_0097	PF07_0097_v7.1_P3/4	conserved Plasmodium protein, unknown function	PF3D7_0723400	PF07_0097				Pf3D7_07_v3:978,920..983,188(-)	conserved Plasmodium protein, unknown function	5.58108e-06	0.00060681	0.000804623	0.929007	1.02042	0.174702	1.3664	0.127064	1.42223	0.304458	1.26467	0.0298614	1.6662	0.428085	1.19797	0.350787	-1.25579	8.47801	10.739	14.2822	2.58444	5.51177	4.98691	6.15247	1
3851	PF07_0098	PF07_0098_v7.1_P1/1	dynactin 4, putative	PF3D7_0723500	PF07_0098				Pf3D7_07_v3:984,778..985,458(-)	dynactin subunit 5, putative	1.1408e-06	6.57671e-08	7.21391e-06	0.625552	1.12451	0.311234	1.27755	0.00787223	1.96005	0.0131421	1.86564	4.78272e-05	3.03239	0.0113916	1.89185	0.85278	1.04879	9.88881	14.0243	47.1696	9.55656	9.80551	9.93298	6.8884	1
3305	PF07_0099	PF07_0099_v7.1_P1/1	conserved Plasmodium protein, unknown function	PF3D7_0723600	PF07_0099				Pf3D7_07_v3:986,598..987,365(+)	proteasome assembly chaperone 4, putative	9.89697e-11	4.96221e-07	6.28521e-09	0.049598	-1.57164	0.764508	1.06936	0.043005	1.59495	0.0332004	1.63712	0.000358491	2.41174	0.000323774	2.43086	0.211389	-1.35307	21.3914	26.3454	38.2516	6.73005	18.7797	16.5206	5.98201	1
847	PF07_0100	PF07_0100_v7.1_P2/3	conserved Plasmodium protein, unknown function	PF3D7_0723700	PF07_0100				Pf3D7_07_v3:988,145..991,243(+)	metallo-hydrolase/oxidoreductase, putative	2.10407e-09	1.72708e-09	4.85199e-09	1.61124e-05	1.76312	0.00112687	1.49447	0.098438	1.21153	0.144417	1.18378	0.00238377	1.4488	5.61668e-06	1.83468	0.0010367	1.5421	16.9292	5.39267	66.2012	3.01255	19.184	4.36493	1.5472	1
375	PF07_0101	PF07_0101_v7.1_P2/7	conserved Plasmodium protein, unknown function	PF3D7_0723800	PF07_0101				Pf3D7_07_v3:993,232..1,000,233(+)	conserved Plasmodium protein, unknown function	9.47628e-12	0.000882025	6.30503e-11	0.0224481	1.88078	0.0329592	1.79889	0.25185	-1.36054	0.0101308	-2.05286	0.00812994	-2.10126	0.220079	-1.39093	0.818732	-1.06739	25.3982	44.252	13.2921	3.30845	26.964	33.5572	8.46273	1
777	PF07_0103	PF07_0103_v7.1_P1/1	mitochondrial import inner membrane translocase subunit tim14, putative	PF3D7_0724400	PF07_0103				Pf3D7_07_v3:1,023,651..1,024,121(+)	mitochondrial import inner membrane translocase subunit TIM14, putative	5.71577e-10	5.66072e-09	0.0115851	0.18592	1.26444	0.0010156	1.86789	0.0273942	1.49273	0.0146459	1.56367	0.0182073	1.53908	0.0969651	1.34533	0.924549	1.01788	18.735	14.1335	59.5371	6.4163	3.50594	1.88917	3.66417	1
1483	PF07_0104	PF07_0104_v7.1_P1/6	kinesin-like protein, putative	PF3D7_0724900	PF07_0104				Pf3D7_07_v3:1,052,465..1,058,158(+)	kinesin-19, putative	1.17996e-10	0.0372932	2.5259e-12	0.893021	-1.05539	0.0333522	2.41681	0.0320227	2.43436	0.460052	-1.34625	0.00126717	-4.04963	0.000586815	-4.51962	0.0405186	-2.47414	21.1126	83.4835	4.69797	2.65382	34.1442	96.4378	19.2061	1
2348	PF07_0105	PF07_0105_v7.1_P2/4	exonuclease I, putative	PF3D7_0725000	PF07_0105				Pf3D7_07_v3:1,058,933..1,062,976(-)	exonuclease I, putative	1.07223e-13	1.32183e-07	2.4838e-09	0.101741	1.37088	0.273106	-1.23236	0.000447158	-2.07303	0.00451043	-1.7691	0.0229228	-1.56341	0.406568	-1.17072	0.471199	1.15731	34.7647	30.5433	43.9668	5.51829	20.2588	12.7134	4.26735	1
1607	PF07_0106	PF07_0106_v7.1_P3/3	conserved Plasmodium protein, unknown function	PF3D7_0725300	PF07_0106				Pf3D7_07_v3:1,072,202..1,074,754(-)	conserved Plasmodium protein, unknown function	3.51976e-16	1.47881e-05	4.06372e-14	0.00418488	-1.52742	0.717548	1.05161	0.293591	1.15855	0.00211104	1.58266	7.07682e-07	2.30898	0.266405	-1.16869	0.00132665	-1.67523	50.9146	24.2021	25.5044	1.73192	45.5863	15.4781	2.30883	1
215	PF07_0107	PF07_0107_v7.1_P3/3	Plasmodium exported protein, unknown function	PF3D7_0726100	PF07_0107				Pf3D7_07_v3:1,093,566..1,096,122(-)	Plasmodium exported protein, unknown function	1.65635e-13	0.58279	7.70789e-12	0.0164471	-2.28211	0.66597	-1.153	0.7049	1.13299	0.140912	1.63697	0.600678	1.18855	3.00753e-05	-4.82176	0.000446274	-3.89125	33.7443	90.0795	0.307594	0.117302	31.4997	60.0626	12.966	1
3082	PF07_0109	PF07_0109_v7.1_P1/1	conserved Plasmodium protein, unknown function	PF3D7_0726700	PF07_0109				Pf3D7_07_v3:1,143,303..1,143,815(-)	conserved Plasmodium protein, unknown function	2.56325e-10	0.00197263	8.03341e-06	0.0332023	1.73676	0.257983	-1.33121	0.113488	-1.49779	0.876093	1.03984	0.314166	-1.28925	0.580861	-1.1487	0.369917	-1.27324	19.9162	30.7613	11.2428	2.4807	9.69457	10.6954	7.50204	1
3175	PF07_0109a	PF07_0109A_v7.1_P1/1	conserved Plasmodium protein, unknown function	PF3D7_0726800	PF07_0109a				Pf3D7_07_v3:1,144,046..1,144,730(-)	dolichyl-diphosphooligosaccharide--protein glycosyltransferase subunit DAD1, putative	5.36985e-10	0.441208	1.24989e-08	0.305435	1.47763	0.0750256	-1.992	0.750106	-1.12804	0.0734691	1.99978	0.146753	1.74581	0.0352095	2.27743	0.0036062	3.50574	18.825	66.1993	0.607271	0.305073	17.7348	44.5468	17.0805	1
1499	PF07_0110	PF07_0110_v7.1_P2/2	protein phosphatase, putative	PF3D7_0726900	PF07_0110				Pf3D7_07_v3:1,145,648..1,147,207(+)	mitochondrial import inner membrane translocase subunit TIM50, putative	1.52501e-07	0.00394001	6.55755e-06	0.00321546	-3.14926	0.0105559	-2.6625	0.339322	-1.41999	0.987679	-1.00564	0.757196	-1.11937	0.265665	1.50604	0.0351166	-2.33706	11.8691	38.8085	9.56934	4.46986	9.90444	23.1319	15.8815	1
453	PF07_0111	PF07_0111_v7.1_P3/4	conserved Plasmodium protein, unknown function	PF3D7_0727000	PF07_0111				Pf3D7_07_v3:1,147,570..1,151,058(-)	vacuolar protein sorting-associated protein 53, putative	6.88644e-08	0.017512	9.9123e-06	0.00226474	-1.57534	0.115686	-1.24883	0.607942	1.07387	0.0496355	-1.32339	0.927292	1.01273	0.117973	1.24704	0.628571	1.07447	12.7164	6.01717	6.23727	0.421623	9.47978	3.20404	2.29831	1
3506	PF07_0112	PF07_0112_v7.1_P1/1	proteasome subunit alpha type 5, putative	PF3D7_0727400	PF07_0112				Pf3D7_07_v3:1,162,710..1,163,831(+)	proteasome subunit alpha type-5, putative	2.49924e-06	0.105733	0.000337753	0.706779	1.05599	0.893168	-1.01962	0.347331	1.14666	0.16811	1.22415	0.262049	1.17796	0.064422	1.31585	0.176854	1.23582	9.1762	4.72664	2.76182	0.20323	6.22284	2.28955	2.5019	1
2171	PF07_0113	PF07_0113_v7.1_P1/2	conserved Plasmodium protein, unknown function	PF3D7_0727500	PF07_0113				Pf3D7_07_v3:1,164,455..1,166,578(-)	mTERF domain-containing protein, putative	9.88968e-14	0.00319705	3.33886e-10	0.0134015	2.04423	0.0153469	-2.01299	0.0334361	-1.83586	0.434968	-1.24176	0.917794	1.02891	0.289166	1.34326	0.151917	1.53638	34.9572	65.5799	10.0663	2.69776	23.7429	31.8155	9.11202	1
1842	PF07_0115	PF07_0115_v7.1_P5/6	cation transporting ATPase, putative	PF3D7_0727800	PF07_0115				Pf3D7_07_v3:1,175,944..1,181,700(+)	cation transporting ATPase, putative	2.78105e-11	0.85252	3.58578e-11	0.0356978	-1.32572	0.0219295	-1.36288	0.552032	1.08051	0.764552	-1.03969	0.0579465	1.28784	0.00723386	1.44539	0.0996079	1.26277	23.4911	9.74972	0.0350902	0.00208054	28.1277	8.33862	2.0159	1
1034	PF07_0116	PF07_0116_v7.1_P5/6	conserved Plasmodium protein, unknown function	PF3D7_0727900	PF07_0116				Pf3D7_07_v3:1,184,401..1,190,172(+)	conserved Plasmodium protein, unknown function	9.6454e-06	7.84916e-06	5.42591e-05	0.0688377	-1.38538	0.37336	1.1694	0.000437597	1.96528	0.0172961	1.54368	0.136969	1.30244	0.0142253	1.56569	0.263312	-1.23485	8.02013	6.02856	27.6887	2.97329	7.83204	4.20513	3.65101	1
2954	PF07_0117	PF07_0117_v7.1_P1/1	eukaryotic translation initiation factor 2 alpha subunit, putative	PF3D7_0728000	PF07_0117				Pf3D7_07_v3:1,191,179..1,192,289(-)	eukaryotic translation initiation factor 2 subunit alpha	5.58068e-06	0.0222146	0.000225287	1.81247e-05	-2.37369	0.164511	-1.27955	0.227731	-1.23756	0.779331	-1.05022	0.260505	-1.21963	0.798628	-1.04563	0.220492	-1.26053	8.47807	6.37516	5.74163	0.616782	6.56573	3.52654	3.65237	1
1077	PF07_0118	PF07_0118_v7.1_P16/16	conserved Plasmodium membrane protein, unknown function	PF3D7_0728100	PF07_0118				Pf3D7_07_v3:1,193,616..1,210,301(-)	conserved Plasmodium membrane protein, unknown function	1.78391e-11	0.131217	1.57584e-09	0.046433	1.88645	0.170277	1.53761	0.0952929	-1.69369	0.0391584	-1.93246	0.663366	-1.14436	0.183346	1.51753	0.112007	1.7085	24.2631	57.1482	2.39199	0.804853	21.0134	35.3527	11.4403	1
269	PF07_0120	PF07_0120_v7.1_P1/8	conserved Plasmodium protein, unknown function	PF3D7_0729100	PF07_0120				Pf3D7_07_v3:1,238,446..1,246,188(+)	conserved Plasmodium protein, unknown function	3.9805e-07	0.195473	0.0614059	0.9056	1.03142	0.460825	-1.21309	0.0998359	1.54975	0.37842	-1.25999	0.455603	-1.21585	0.187451	1.41674	0.419794	-1.25368	10.8966	18.2504	1.74384	0.417242	2.35424	2.81645	8.13505	1
2437	PF07_0121	PF07_0121_v7.1_P1/3	60S ribosomal subunit export protein, putative	PF3D7_0729300	PF07_0121				Pf3D7_07_v3:1,248,837..1,251,503(-)	60S ribosomal export protein NMD3, putative	4.75018e-13	1.20945e-07	1.04146e-06	0.82388	1.03989	0.0974586	1.34615	0.428767	1.14991	0.0782677	1.37254	0.00144216	1.83103	0.0271541	1.49588	0.203498	-1.27349	31.3775	23.8408	44.3671	4.81577	11.921	6.46976	3.69048	1
2078	PF07_0122	PF07_0122_v7.1_P1/2	BRIX protein, putative	PF3D7_0729400	PF07_0122				Pf3D7_07_v3:1,252,847..1,254,097(+)	ribosome biogenesis protein BRX1, putative	2.42268e-12	1.39106e-06	8.29355e-08	0.980815	1.00498	0.171883	1.3317	0.389246	1.19604	0.0380654	1.55734	0.000143023	2.40858	0.53471	1.13739	0.136242	-1.39775	27.9933	29.456	34.1015	5.1262	15.0646	11.3227	5.11094	1
528	PF07_0123	PF07_0123_v7.1_P2/3	mRNA (N6-adenosine)-methyltransferase, putative	PF3D7_0729500	PF07_0123				Pf3D7_07_v3:1,255,371..1,257,653(+)	mRNA (N6-adenosine)-methyltransferase, putative	2.36156e-08	0.0409518	0.000363801	0.394193	-1.14352	0.71744	-1.05835	0.814147	1.0375	0.690643	1.06437	0.130594	1.27221	0.864804	-1.02702	0.812918	1.04042	13.9199	8.39681	4.51486	0.389067	6.16072	2.6545	2.92995	1
2375	PF07_0124	PF07_0124_v7.1_P3/3	conserved Plasmodium protein, unknown function	PF3D7_0729700	PF07_0124				Pf3D7_07_v3:1,260,154..1,262,780(-)	conserved Plasmodium protein, unknown function	6.06949e-12	0.0640382	9.39314e-12	0.00711974	2.27186	0.147588	1.52897	0.010751	2.16704	0.601974	-1.16282	0.000237566	-3.24449	0.0322112	-1.89633	0.607837	1.17194	26.2232	53.7706	3.66427	1.07337	31.0488	45.4753	9.95955	1
996	PF07_0126	PF07_0126_v7.1_P1/4	transcription factor with AP2 domain(s), putative	PF3D7_0730300	PF07_0126				Pf3D7_07_v3:1,297,459..1,301,454(+)	AP2 domain transcription factor AP2-L, putative	5.01569e-11	0.138634	2.95664e-11	0.0633079	-1.46248	0.211841	1.28654	0.909282	-1.02299	0.728832	1.07166	0.578154	1.11759	4.63953e-07	-3.41816	0.00176912	-2.05086	22.4963	22.0293	2.2998	0.321723	28.5344	19.9587	4.75633	1
2449	PF07_0127	PF07_0127_v7.1_P1/1	conserved Plasmodium protein, unknown function	PF3D7_0730400	PF07_0127				Pf3D7_07_v3:1,304,347..1,305,096(+)	IMP1-like protein, putative	2.94995e-07	0.099549	1.22278e-09	0.822102	-1.12153	0.613236	1.29465	0.0306953	3.13108	0.427335	1.5018	0.00120824	-5.97776	0.0123476	-3.81016	0.243631	-1.90044	11.1946	71.6416	2.86716	2.62125	21.4428	98.0187	31.0839	1
558	PF07_0129	PF07_0129_v7.1_P1/3	acyl-coA synthetase, PfACS5	PF3D7_0731600	PF07_0129				Pf3D7_07_v3:1,368,161..1,370,596(+)	acyl-CoA synthetase	7.26369e-17	1.42051e-15	5.84169e-12	0.000230964	-1.97202	7.437e-08	-3.08261	1.44909e-07	-2.96959	0.00234507	-1.72015	0.000911101	-1.82095	0.00136237	-1.77779	0.0002341	-2.06498	56.4118	38.3229	192.89	18.7197	32.1408	15.5961	3.29966	1
2304	PF07_0132	PF07_0132_v7.1_P2/2	rifin	PF3D7_0732200	PF07_0132				Pf3D7_07_v3:1,390,711..1,392,043(+)	rifin	3.54856e-06	7.00258e-11	2.98198e-07	0.00154424	-6.50834	4.55359e-05	-12.7015	9.43854e-06	-16.9308	0.000206281	-9.5951	0.00255185	-5.88315	0.0591774	-2.89241	0.004142	-5.9774	8.86769	65.5502	86.7177	91.5744	13.4176	70.8455	35.9042	1
3073	PF07_0138	PF07_0138_v7.1_P1/1	rifin	PF3D7_0732900	PF07_0138				Pf3D7_07_v3:1,414,434..1,415,683(+)	rifin	0.00139072	5.71841e-06	5.14593e-06	0.011526	-2.98182	0.063855	-2.18938	0.000367111	-5.04473	0.0093542	-3.08669	0.0901315	-2.04125	0.978309	1.01127	0.0720024	-2.25254	4.42182	18.481	28.8129	17.2034	10.1582	30.326	20.3004	1
3190	PF08_0001	PF08_0001_v7.1_P1/1	Plasmodium exported protein, unknown function	PF3D7_0830900	PF08_0001				Pf3D7_08_v3:1,317,600..1,318,341(-)	Plasmodium exported protein, unknown function	0.000350077	8.14751e-06	1.36783e-06	0.0285531	-2.66931	8.79383e-05	-6.75343	0.0750874	-2.19973	0.727546	-1.16278	0.183865	-1.79034	0.0646722	-2.27001	0.0036225	-4.1975	5.32951	24.5359	27.5577	18.1243	11.6088	38.1745	22.3613	1
2604	PF08_0002	PF08_0002_v7.1_P6/6	surface-associated interspersed gene 8.2 (SURFIN8.2)	PF3D7_0830800	PF08_0002				Pf3D7_08_v3:1,310,637..1,316,955(+)	surface-associated interspersed protein 8.2 (SURFIN 8.2)	3.41074e-06	0.0307708	5.73415e-06	0.00856995	-3.16138	0.0620708	-2.21629	0.832694	-1.09178	0.700131	-1.17377	0.195111	-1.72491	0.742286	1.14654	0.0189424	-2.96441	8.90224	37.8327	5.07941	3.08378	10.0445	30.4908	20.6419	1
2349	PF08_0003	PF08_0003_v7.1_P1/2	tryptophan/threonine-rich antigen	PF3D7_0830500	PF08_0003				Pf3D7_08_v3:1,296,134..1,298,328(-)	sporozoite and liver stage tryptophan-rich protein, putative	1.24347e-13	0.00117416	4.70163e-14	0.0177055	-2.53103	0.293816	-1.48766	0.729145	1.13889	0.0645524	2.03734	0.00282187	-3.31817	2.7779e-07	-10.7686	0.000285359	-5.00535	34.4141	119.28	12.551	6.21457	45.1333	111.738	16.835	1
3340	PF08_0004	PF08_0004_v7.1_P1/1	conserved Plasmodium protein, unknown function	PF3D7_0830400	PF08_0004				Pf3D7_08_v3:1,294,022..1,294,722(+)	CRA domain-containing protein, putative	5.67954e-08	0.34384	5.247e-05	0.00335005	-1.70808	0.219778	-1.23631	0.259548	-1.21478	0.633297	-1.08512	0.26347	1.21281	0.0514221	-1.40861	0.00383134	-1.75609	12.9276	9.29698	0.921574	0.0946792	7.86306	4.03912	3.49304	1
3240	PF08_0005	PF08_0005_v7.1_P2/2	conserved Plasmodium protein, unknown function	PF3D7_0830300	PF08_0005				Pf3D7_08_v3:1,290,240..1,291,406(-)	sporozoite invasion-associated protein 2	0.00474303	0.0414579	7.93192e-05	0.00105096	-2.56321	0.372637	-1.26789	0.965098	1.01165	0.866682	-1.04544	0.929956	1.02354	0.028672	-1.82269	0.000123915	-3.37572	3.66189	6.31261	4.49095	1.10597	7.48467	9.21613	8.37307	1
3645	PF08_0006	PF08_0006_v7.1_P1/1	prohibitin, putative	PF3D7_0829200	PF08_0006				Pf3D7_08_v3:1,254,558..1,255,376(+)	prohibitin, putative	1.18576e-09	0.0250945	5.50983e-09	0.0150206	2.52841	0.210739	-1.58708	0.764534	1.11553	0.108704	1.81574	0.00120856	3.59314	0.0150597	2.52741	0.0469441	2.2213	17.707	57.9863	5.49159	2.56909	18.9846	44.4072	15.906	1
3820	PF08_0007	PF08_0007_v7.1_P1/1	conserved Plasmodium protein, unknown function	PF3D7_0828900	PF08_0007				Pf3D7_08_v3:1,241,966..1,242,895(-)	conserved Plasmodium protein, unknown function	9.64124e-12	0.911947	1.31214e-11	0.000155126	3.53286	0.00787657	2.31101	0.0503036	1.82575	0.0208761	-2.05176	0.0130043	-2.17621	0.74023	1.10424	0.119122	1.6603	25.3667	55.7494	0.0124121	0.00389693	30.2983	47.5627	10.6747	1
1059	PF08_0008	PF08_0008_v7.1_P2/3	GPI-anchored micronemal antigen	PF3D7_0828800	PF08_0008				Pf3D7_08_v3:1,237,285..1,239,501(-)	GPI-anchored micronemal antigen	5.25801e-14	0.017815	3.6766e-15	0.641616	1.21153	0.0152598	2.84052	0.0534282	2.26499	0.866724	1.07153	5.12981e-07	-12.4591	0.00069813	-4.58946	0.191593	-1.78958	36.4939	152.165	6.20119	3.69377	53.6373	159.747	20.2523	1
988	PF08_0009	PF08_0009_v7.1_P1/1	translation initiation factor EIF-2b alpha subunit, putative	PF3D7_0828500	PF08_0009				Pf3D7_08_v3:1,226,750..1,228,409(-)	translation initiation factor eIF-2B subunit alpha, putative	1.33121e-08	0.174172	6.74972e-07	0.0162904	2.63823	0.364391	1.42307	0.0563191	-2.13468	0.274642	-1.5313	0.407807	-1.37941	0.36817	1.41909	0.168838	1.7803	14.5957	53.6905	1.92649	1.01237	12.4279	32.6545	17.8671	1
2333	PF08_0010	PF08_0010_v7.1_P1/2	conserved Plasmodium protein, unknown function	PF3D7_0828300	PF08_0010				Pf3D7_08_v3:1,221,025..1,222,683(-)	conserved Plasmodium protein, unknown function	3.60895e-09	0.000438271	4.21987e-05	0.232601	1.20196	0.00640425	-1.55237	0.057599	-1.34642	0.403372	-1.13664	0.367713	-1.14818	0.505859	1.10713	0.0990592	1.31573	16.2208	9.28114	15.1635	1.23946	8.06602	3.29657	2.77915	1
770	PF08_0012	PF08_0012_v7.1_P6/7	SET domain protein, putative	PF3D7_0827800	PF08_0012				Pf3D7_08_v3:1,198,858..1,206,057(+)	SET domain protein, putative	0.00175883	4.21719e-05	2.16425e-06	0.00288032	-1.93033	0.14469	-1.35755	0.355441	1.21146	0.0102357	-1.74497	0.000827664	-2.1195	0.176901	-1.32626	0.00539081	-1.91695	4.27316	4.47469	22.0712	3.30174	11.094	8.29805	5.08622	1
1867	PF08_0014	PF08_0014_v7.1_P1/1	apicoplast ribosomal protein L21 precursor, putative	PF3D7_0827500	PF08_0014				Pf3D7_08_v3:1,186,175..1,187,125(+)	apicoplast ribosomal protein L21 precursor, putative	1.10117e-11	2.32411e-07	2.71162e-08	0.740715	-1.10447	0.614895	-1.16326	0.00184114	-2.73522	0.0100007	-2.25374	0.04294	-1.87076	0.174107	-1.51202	0.12412	-1.65205	25.125	55.6638	41.4734	13.1262	16.6065	26.2795	10.7609	1
3350	PF08_0015	PF08_0015_v7.1_P1/1	conserved Plasmodium protein, unknown function	PF3D7_0827400	PF08_0015				Pf3D7_08_v3:1,184,595..1,185,251(+)	conserved Plasmodium protein, unknown function	2.00267e-05	0.00048179	1.70478e-06	0.103244	-1.63025	0.432251	-1.26112	0.338061	1.32795	0.0903539	-1.66331	3.17089e-05	-4.05279	0.270156	-1.38709	0.0464545	-1.90579	7.42987	15.8117	14.9052	4.53145	11.3601	17.2683	10.3366	1
433	PF08_0016	PF08_0016_v7.1_P2/3	conserved Plasmodium protein, unknown function	PF3D7_0827300	PF08_0016				Pf3D7_08_v3:1,181,295..1,183,796(+)	conserved Plasmodium protein, unknown function	3.90387e-11	0.471067	0.000142357	1.56525e-05	-2.19607	0.764381	-1.04838	0.230994	-1.2101	0.364183	-1.15467	0.526285	-1.1053	0.979547	1.00405	1.72736e-05	-2.30588	22.9148	13.9924	0.531264	0.0463436	6.96346	3.03721	2.96591	1
2683	PF08_0018	PF08_0018_v7.1_P3/4	translation initiation factor-like protein	PF3D7_0827100	PF08_0018				Pf3D7_08_v3:1,172,394..1,176,587(+)	translation initiation factor IF-2, putative	5.11065e-12	1.86242e-05	9.01451e-09	0.00798486	-1.47669	0.00474458	-1.51888	9.38783e-06	-2.05334	0.672304	-1.06079	0.9195	1.01418	0.491261	1.10102	3.30247e-07	-2.54633	26.5474	12.6825	24.7297	1.68773	18.2263	6.21945	2.3204	1
2361	PF08_0019	PF08_0019_v7.1_P1/1	receptor for activated c kinase	PF3D7_0826700	PF08_0019				Pf3D7_08_v3:1,160,164..1,161,708(-)	receptor for activated c kinase	6.54628e-06	0.00826483	3.43007e-06	0.543926	-1.14242	0.668089	-1.0985	0.838715	-1.04555	0.532815	1.14667	0.00692321	1.86719	0.0241392	1.66969	0.96416	1.01057	8.34307	9.83002	7.86699	1.32416	10.5908	8.91309	5.72281	1
173	PF08_0020	PF08_0020_v7.1_P1/4	ubiquitination-mediated degradation component, putative	PF3D7_0826500	PF08_0020				Pf3D7_08_v3:1,152,302..1,156,282(+)	ubiquitin conjugation factor E4 B, putative	0.133573	0.00597758	0.0174047	0.00701805	-1.46162	0.3739	-1.12657	0.996927	-1.00051	0.131448	-1.22683	0.173381	-1.20193	0.569708	-1.07888	0.198076	-1.20395	1.73583	0.758429	8.60007	0.5368	3.21953	1.00478	2.12222	1
1463	PF08_0021	PF08_0021_v7.1_P2/2	SPRY domain, putative	PF3D7_0826300	PF08_0021				Pf3D7_08_v3:1,146,167..1,147,504(+)	SPRY domain, putative	6.65575e-11	0.550803	5.83799e-08	0.0242028	2.05792	0.923725	-1.02995	0.567201	-1.19335	0.271783	-1.40739	0.727548	1.11345	0.0614261	1.80715	0.042694	1.991	22.031	51.4955	0.363073	0.121235	15.5382	25.9421	11.3531	1
2787	PF08_0025	PF08_0025_v7.1_P1/1	conserved Plasmodium protein, unknown function	PF3D7_0825600	PF08_0025				Pf3D7_08_v3:1,100,816..1,101,073(-)	cytochrome c oxidase assembly protein, putative	5.13521e-14	0.37	2.89767e-13	0.0277218	1.45877	0.0229535	1.47859	0.101213	-1.31862	0.000496131	-1.88167	0.544518	1.10573	0.00889996	1.57718	0.0139954	1.57581	36.5525	24.6088	0.825404	0.0793856	39.7975	19.1382	3.27004	1
1111	PF08_0028	PF08_0028_v7.1_P3/4	conserved Plasmodium membrane protein, unknown function	PF3D7_0824800	PF08_0028				Pf3D7_08_v3:1,075,800..1,079,630(+)	conserved Plasmodium membrane protein, unknown function	0.00798307	0.0859074	0.542255	0.0399318	-1.54411	0.500784	-1.14842	0.271979	-1.25493	0.217884	-1.29085	0.11402	-1.39078	0.54035	-1.13404	0.295613	1.25977	3.35088	3.46109	3.12847	0.461624	0.82269	0.606964	5.0169	1
2559	PF08_0029	PF08_0029_v7.1_P2/2	conserved Plasmodium protein, unknown function	PF3D7_0824500	PF08_0029				Pf3D7_08_v3:1,066,154..1,067,472(+)	conserved Plasmodium protein, unknown function	8.85294e-18	1.69193e-05	2.91572e-15	0.0020484	-1.70589	0.00196914	-1.70987	0.000294614	-1.90611	0.949407	1.01028	0.0225366	1.46562	0.143044	1.271	0.0184444	-1.52699	64.5836	41.2685	25.0509	2.28676	54.476	24.8642	3.10368	1
3901	PF08_0031	PF08_0031_v7.1_P1/1	oxoglutarate/malate translocator protein, putative	PF3D7_0823900	PF08_0031				Pf3D7_08_v3:1,047,551..1,048,507(+)	dicarboxylate/tricarboxylate carrier	1.22775e-10	0.0525984	1.47258e-08	0.571281	1.17043	0.0514448	-1.74319	0.000180384	-3.18004	0.69299	1.11584	0.0732933	1.66318	0.0903907	1.61568	0.105518	-1.63126	21.05	39.837	4.03363	1.09051	17.4917	23.6449	9.19209	1
826	PF08_0032	PF08_0032_v7.1_P2/2	DnaJ protein, putative	PF3D7_0823800	PF08_0032				Pf3D7_08_v3:1,043,813..1,045,780(+)	DnaJ protein, putative	0.00327898	0.300014	0.000126481	0.202272	1.32184	0.703248	-1.08594	0.0926296	1.44968	0.327227	1.23778	0.330054	-1.23622	0.133769	1.39048	0.198081	1.35142	3.88632	4.47022	1.10766	0.182011	7.06752	5.8067	5.58691	1
821	PF08_0034	PF08_0034_v7.1_P4/5	histone acetyltransferase GCN5	PF3D7_0823300	PF08_0034				Pf3D7_08_v3:1,028,752..1,033,514(+)	histone acetyltransferase GCN5	0.00806348	0.018736	0.00269325	0.109456	-1.17984	0.598969	-1.05486	0.117411	-1.17543	0.26822	-1.11991	0.338527	-1.1026	0.546194	1.06325	0.00497396	-1.38141	3.34495	0.845708	6.09547	0.220161	4.57245	0.825757	1.22804	1
1308	PF08_0035	PF08_0035_v7.1_P4/4	conserved Plasmodium protein, unknown function	PF3D7_0822900	PF08_0035				Pf3D7_08_v3:1,007,777..1,011,307(-)	conserved Plasmodium protein, unknown function	3.5517e-12	2.46312e-08	2.66877e-12	0.311268	-1.58203	0.303609	-1.59383	0.667526	-1.21333	0.038623	-2.61215	3.19714e-09	-34.2367	0.000724856	-5.25053	0.0798989	-2.36611	27.2444	135.519	51.9069	36.8849	34.0097	120.836	24.1603	1
2090	PF08_0036	PF08_0036_v7.1_P1/3	Pfsec23	PF3D7_0822600	PF08_0036				Pf3D7_08_v3:997,055..999,529(+)	protein transport protein SEC23	4.32117e-05	0.970038	1.2435e-07	0.992752	-1.00159	0.361453	1.17439	0.0134406	1.57327	0.634981	1.08681	0.0119715	-1.58632	0.0403034	-1.44847	0.428166	-1.16064	6.83349	5.15392	0.00143169	0.000154258	14.5301	7.82775	3.66333	1
2070	PF08_0037	PF08_0037_v7.1_P1/1	RNA polymerase II mediator complex protein MED7, putative	PF3D7_0822100	PF08_0037				Pf3D7_08_v3:981,018..981,722(-)	mediator of RNA polymerase II transcription subunit 7, putative	1.42445e-11	4.49853e-05	2.06141e-08	0.178732	-1.29564	0.840508	1.039	0.688272	1.07932	0.398201	1.17516	0.000784142	2.00509	0.0133607	1.63622	0.377641	-1.19755	24.6621	21.919	21.8668	2.77638	17.0001	10.7923	4.3169	1
3686	PF08_0039	PF08_0039_v7.1_P1/1	60S ribosomal protein L22, putative	PF3D7_0821700	PF08_0039				Pf3D7_08_v3:973,586..974,267(+)	60S ribosomal protein L22, putative	6.13967e-14	0.0999221	3.46019e-12	5.12529e-07	-2.02717	0.0012437	-1.49645	0.00144765	-1.48702	0.489729	-1.08321	0.355697	1.11312	0.175748	1.17148	0.0179054	-1.35586	36.1116	11.8154	2.86059	0.133709	33.3806	7.80132	1.58922	1
2890	PF08_0040	PF08_0040_v7.1_P2/2	clp1-related protein, putative	PF3D7_0821600	PF08_0040				Pf3D7_08_v3:969,690..971,714(+)	polyribonucleotide 5'-hydroxyl-kinase Clp1, putative	3.95292e-12	0.000490521	7.5836e-07	0.000718058	-1.74921	0.672128	1.06629	0.507237	1.10601	0.832364	-1.03259	0.0105109	1.50254	0.0278185	1.41274	0.0379874	-1.41483	27.0379	15.2631	14.8563	1.19808	12.2905	4.95581	2.7419	1
3349	PF08_0041	PF08_0041_v7.1_P1/1	ribosome biogenesis protein nep1 homologue, putative	PF3D7_0821500	PF08_0041				Pf3D7_08_v3:967,901..968,740(-)	ribosomal RNA small subunit methyltransferase NEP1, putative	4.2252e-13	2.10747e-06	1.25983e-06	0.680047	-1.10255	0.0343811	1.67748	0.0789659	1.52966	0.150641	1.41211	0.00859248	1.92439	0.750058	1.07828	0.34136	-1.27393	31.6334	43.516	32.5003	6.38693	11.7025	11.4988	6.68165	1
532	PF08_0043	PF08_0043_v7.1_P1/1	conserved Plasmodium protein, unknown function	PF3D7_0821200	PF08_0043				Pf3D7_08_v3:957,498..958,073(+)	conserved Plasmodium protein, unknown function	0.304609	0.00355841	0.146921	0.00164097	-3.21932	0.00955033	-2.55707	0.254253	-1.48641	0.322068	-1.40979	0.172668	-1.60978	0.623621	1.18443	0.0523584	-2.08469	1.24854	3.64283	9.81068	4.0892	1.76354	3.67532	14.1716	1
1322	PF08_0044	PF08_0044_v7.1_P2/3	protein kinase 1	PF3D7_0821100	PF08_0044				Pf3D7_08_v3:953,448..956,314(+)	protein kinase 1	4.20228e-12	0.00220689	8.6178e-10	1.45377e-05	-2.10362	0.0257882	-1.40908	0.506729	1.10374	0.331397	-1.15597	0.014984	-1.45783	0.0102811	-1.49133	2.42503e-07	-2.74668	26.9204	14.5467	10.9658	0.846501	22.0457	8.50903	2.62461	1
653	PF08_0045	PF08_0045_v7.1_P3/3	2-oxoglutarate dehydrogenase E1 component	PF3D7_0820700	PF08_0045				Pf3D7_08_v3:932,321..935,626(+)	2-oxoglutarate dehydrogenase E1 component	3.71349e-11	0.550527	1.31493e-05	0.117346	1.46138	0.756873	1.07647	0.11527	1.46466	0.663493	-1.10919	0.374617	1.23667	0.0344633	1.68232	0.0677861	1.60992	22.9991	32.0231	0.363577	0.0723189	9.19495	9.1448	6.76291	1
1365	PF08_0046	PF08_0046_v7.1_P1/2	conserved Plasmodium protein, unknown function	PF3D7_0820400	PF08_0046				Pf3D7_08_v3:922,208..923,932(+)	conserved Plasmodium protein, unknown function	2.17806e-09	0.520675	1.02322e-08	0.134023	-1.38582	0.632975	1.10786	0.0524521	-1.53294	0.80816	-1.05339	0.00573124	1.87169	0.00373921	1.93824	0.724719	1.08403	16.8832	19.0526	0.421248	0.0679109	18.0346	14.5371	5.48126	1
2661	PF08_0047	PF08_0047_v7.1_P2/2	conserved Plasmodium protein, unknown function	PF3D7_0820300	PF08_0047				Pf3D7_08_v3:919,055..920,896(+)	conserved Plasmodium protein, unknown function	3.05691e-06	0.00125621	9.37653e-07	0.0291428	-1.72251	0.510444	-1.17209	0.920525	-1.02429	0.955596	1.01348	0.00104296	-2.35366	0.00814777	-1.95608	0.00309059	-2.25461	8.99819	12.8082	12.3781	2.51703	12.0426	12.2441	6.91377	1
1890	PF08_0048	PF08_0048_v7.1_P2/6	Snf2-related CBP activator, putative	PF3D7_0820000	PF08_0048				Pf3D7_08_v3:900,742..907,714(-)	Snf2-related CBP activator, putative	1.90929e-11	1.62927e-06	2.79911e-07	0.0986813	-1.24882	0.78831	1.03605	0.0678966	1.27992	0.117178	1.23416	0.00387553	1.50032	0.00230951	1.53907	0.309107	-1.15542	24.1437	10.3289	33.4875	2.0466	13.4963	4.12414	2.07792	1
2494	PF08_0049	PF08_0049_v7.1_P1/1	lsm3 homologue, putative	PF3D7_0819900	PF08_0049				Pf3D7_08_v3:899,004..899,657(-)	U6 snRNA-associated Sm-like protein LSm3, putative	5.07327e-05	0.258697	0.00213635	0.0118258	-1.6125	0.22857	-1.24634	0.34644	-1.18705	0.613383	-1.09591	0.930256	-1.01596	0.853398	1.03401	0.0238735	-1.57474	6.71215	5.40753	1.31951	0.151863	4.74831	2.73242	3.91307	1
2229	PF08_0052	PF08_0052_v7.1_P1/2	perforin like protein 5	PF3D7_0819200	PF08_0052				Pf3D7_08_v3:871,410..873,440(+)	perforin-like protein 5	9.16361e-09	2.26647e-08	2.05784e-05	0.0303696	1.3695	4.26861e-05	1.92171	0.00062221	1.68992	0.543691	-1.08911	0.00708742	1.49004	0.166263	1.21758	0.187512	-1.22153	15.0482	7.27875	52.3211	3.61536	8.75265	3.02402	2.34938	1
3346	PF08_0053	PF08_0053_v7.1_P1/1	BRIX domain, putative	PF3D7_0819100	PF08_0053				Pf3D7_08_v3:869,562..870,574(+)	BRIX domain, putative	0.24155	0.0116759	0.602408	0.00817044	-13.066	0.0319692	-7.73818	0.70373	1.42025	0.194605	-3.35496	0.0310688	-7.82877	0.694854	1.43608	0.0745283	-6.04563	1.38956	29.044	7.10494	21.2149	0.734927	10.9722	101.522	1
637	PF08_0054	PF08_0054_v7.1_P1/2	heat shock protein 70	PF3D7_0818900	PF08_0054				Pf3D7_08_v3:860,384..862,417(+)	heat shock protein 70	0.000198552	0.00116192	0.000435469	0.0763003	-1.44919	0.00849289	-1.76294	0.00330187	-1.89909	0.635724	-1.10186	0.48278	-1.15489	0.182882	-1.31774	0.0147741	-1.74585	5.72113	5.88454	12.5779	1.84816	6.01137	4.41647	4.99587	1
671	PF08_0055	PF08_0055_v7.1_P1/2	U3 small nucleolar ribonucleoprotein protein, putative	PF3D7_0818800	PF08_0055				Pf3D7_08_v3:855,654..856,742(-)	U3 small nucleolar ribonucleoprotein protein IMP4, putative	1.02185e-11	8.12468e-07	1.70542e-07	0.924229	-1.02072	0.390516	1.20463	0.0830382	1.46559	0.00156968	2.0869	0.00341906	1.96143	0.537333	1.14269	0.254365	-1.30382	25.2607	28.9057	36.2345	5.92327	14.1219	11.5425	5.55799	1
1534	PF08_0056	PF08_0056_v7.1_P1/1	zinc finger protein, putative	PF3D7_0818500	PF08_0056				Pf3D7_08_v3:842,317..843,215(+)	zinc finger protein, putative	2.60359e-05	7.44248e-07	5.27681e-07	0.007409	-1.83129	0.0156559	-1.71685	0.221124	-1.30313	0.98644	-1.00364	0.000601929	-2.23308	2.62333e-05	-2.80644	0.00017357	-2.60497	7.22357	8.14093	36.589	5.8908	12.7213	10.2406	5.47398	1
2089	PF08_0057	PF08_0057_v7.1_P1/1	conserved Plasmodium protein, unknown function	PF3D7_0817800	PF08_0057				Pf3D7_08_v3:815,150..815,451(+)	conserved Plasmodium protein, unknown function	1.73269e-11	0.223359	3.72088e-11	2.26464e-05	4.8119	6.7127e-05	4.27903	0.942781	1.02342	0.215425	-1.49801	0.733805	-1.11602	0.766721	1.10048	0.0314791	2.15525	24.3145	62.2467	1.53833	0.562602	28.0502	51.2932	12.4346	1
1225	PF08_0058	PF08_0058_v7.1_P1/3	conserved Plasmodium protein, unknown function	PF3D7_0817600	PF08_0058				Pf3D7_08_v3:800,920..804,034(-)	conserved Plasmodium protein, unknown function	1.29986e-12	0.0151197	3.10189e-14	0.0817568	2.01525	0.00770914	3.02393	0.0192307	2.61221	0.0376464	-2.32819	2.05248e-06	-9.30543	0.0396619	-2.30669	0.426977	-1.39904	29.2485	111.493	6.54836	3.56596	46.4356	126.434	18.515	1
1378	PF08_0059	PF08_0059_v7.1_P1/1	protein kinase c inhibitor-like protein, putative	PF3D7_0817500	PF08_0059				Pf3D7_08_v3:798,777..800,205(+)	protein kinase c inhibitor-like protein, putative	3.8827e-05	0.182137	0.013322	0.864829	-1.03879	0.161574	-1.37367	0.679641	-1.09682	0.752086	-1.07321	0.250271	-1.2963	0.103774	1.44903	0.443024	1.20213	6.91498	8.50216	1.8552	0.325859	3.40716	2.99228	5.97199	1
1443	PF08_0060	PF08_0060_v7.1_P2/7	asparagine-rich antigen	PF3D7_0817300	PF08_0060				Pf3D7_08_v3:782,909..789,616(-)	conserved Plasmodium protein, unknown function	4.8767e-16	4.70128e-05	2.08561e-14	0.0792267	1.35707	1.62453e-07	-3.02555	0.485641	-1.12632	0.43443	1.14279	0.988612	-1.00243	0.689708	1.07031	0.142283	-1.31125	49.8409	35.4448	21.7277	2.20741	47.7087	24.2346	3.4542	1
1514	PF08_0061	PF08_0061_v7.1_P3/3	conserved Plasmodium protein, unknown function	PF3D7_0817200	PF08_0061				Pf3D7_08_v3:777,257..779,647(-)	conserved Plasmodium protein, unknown function	3.7228e-07	3.58286e-11	3.2296e-07	0.0001529	1.58455	8.66914e-08	2.07921	1.10639e-05	1.74405	0.229916	1.14123	0.163725	1.16627	0.00199425	1.43604	5.05333e-06	1.86797	10.9628	3.19723	91.5203	3.81305	13.3189	2.77457	1.41656	1
1044	PF08_0063	PF08_0063_v7.1_P4/4	ClpB protein, putative	PF3D7_0816600	PF08_0063				Pf3D7_08_v3:762,118..765,330(-)	chaperone protein ClpB1	4.55263e-20	3.10411e-06	3.34749e-17	0.421481	-1.17612	2.73515e-08	-4.1751	0.00266942	-1.90797	0.764225	1.06213	0.00839978	1.74698	0.110079	1.38693	0.923217	-1.02091	90.0837	89.4254	31.0434	4.40236	73.0805	51.8189	4.82165	1
1210	PF08_0065	PF08_0065_v7.1_P2/2	nucleolar preribosomal assembly protein, putative	PF3D7_0816000	PF08_0065				Pf3D7_08_v3:746,013..747,488(-)	ribosome assembly protein RRB1, putative	1.20382e-10	3.637e-05	1.08399e-07	0.00956695	-1.79554	0.985321	-1.00396	0.181587	1.33732	0.000628733	2.23173	0.0109449	1.77484	0.346429	1.22568	0.0607126	-1.55584	21.081	23.9173	22.5428	3.65369	14.7099	11.9207	5.51064	1
1764	PF08_0068	PF08_0068_v7.1_P4/4	FAD-dependent monooxygenase, putative	PF3D7_0815300	PF08_0068				Pf3D7_08_v3:721,928..725,476(+)	FAD-dependent monooxygenase, putative	1.53671e-15	0.409875	6.58246e-12	0.00316729	1.74533	0.485965	-1.13147	0.0250228	-1.50851	0.940511	-1.01327	0.0131606	1.58214	0.0214193	1.52638	0.112339	1.35736	46.2209	35.4939	0.69624	0.0763793	31.8634	17.4775	3.72989	1
1959	PF08_0069	PF08_0069_v7.1_P1/3	importin beta, putative	PF3D7_0815200	PF08_0069				Pf3D7_08_v3:717,113..719,746(+)	importin beta, putative	5.50817e-08	0.131733	0.0109293	0.00200467	-1.81098	0.317925	-1.19703	0.25421	-1.22849	0.800674	-1.04618	0.188042	-1.26916	0.534762	-1.1177	0.000343475	-2.12722	12.9614	10.1913	2.38538	0.26794	3.54731	1.99227	3.81908	1
2963	PF08_0071	PF08_0071_v7.1_P1/1	Fe-superoxide dismutase	PF3D7_0814900	PF08_0071				Pf3D7_08_v3:708,228..708,824(+)	superoxide dismutase [Fe]	3.76051e-07	0.000313926	3.90687e-05	0.517437	-1.10578	0.938207	1.01208	0.00120921	1.72109	0.117742	1.27982	0.00829965	1.53864	0.00277436	1.64201	0.000866664	1.82243	10.9528	6.46431	16.0867	1.35633	8.13841	3.4309	2.86667	1
3580	PF08_0072	PF08_0072_v7.1_P1/1	conserved Plasmodium protein, unknown function	PF3D7_0814700	PF08_0072				Pf3D7_08_v3:706,076..706,996(+)	conserved Plasmodium protein, unknown function	0.210877	0.284534	0.760727	0.201183	-3.29937	0.478475	-1.92774	0.351866	2.37378	0.112744	-4.4417	0.462454	-1.97519	0.66094	1.49967	0.0317049	-8.96702	1.47035	30.8024	1.18231	3.53834	0.518097	7.7526	101.753	1
3742	PF08_0074	PF08_0074_v7.1_P1/1	DNA/RNA-binding protein Alba, putative	PF3D7_0814200	PF08_0074				Pf3D7_08_v3:687,340..688,086(+)	DNA/RNA-binding protein Alba 1	1.32686e-06	1.73834e-09	0.00831723	0.000155516	-1.90244	0.000285162	-1.84311	2.44397e-05	-2.09187	0.000443539	-1.80056	0.00235712	-1.64371	0.000852278	-1.73858	5.1416e-05	-2.11383	9.74907	5.56588	66.1634	5.39623	3.74243	1.52615	2.77301	1
3250	PF08_0075	PF08_0075_v7.1_P1/1	60S ribosomal protein L13-2, putative	PF3D7_0814000	PF08_0075				Pf3D7_08_v3:680,957..681,809(+)	60S ribosomal protein L13-2, putative	3.69891e-08	0.00110004	0.00192386	0.00245528	-1.93663	0.0271366	-1.5944	0.000185571	-2.33277	0.176742	-1.32139	0.0474238	-1.51519	0.441645	-1.17032	0.0133166	-1.75769	13.4063	13.6648	12.7187	1.85199	4.82848	3.51542	4.9508	1
3323	PF08_0076	PF08_0076_v7.1_P1/1	40S ribosomal protein S16, putative	PF3D7_0813900	PF08_0076				Pf3D7_08_v3:677,989..678,725(-)	40S ribosomal protein S16, putative	5.55982e-09	0.00154898	6.3601e-07	0.0398179	-1.48921	0.446487	-1.1543	0.854476	1.03503	0.0296012	1.52664	0.013174	1.62801	0.0936708	1.37892	0.226938	-1.27772	15.6691	13.5828	11.8467	1.46706	12.4984	7.7388	4.21044	1
2909	PF08_0079	PF08_0079_v7.1_P1/1	translation initiation factor SUI1, putative	PF3D7_0813600	PF08_0079				Pf3D7_08_v3:669,541..670,734(+)	translation initiation factor SUI1, putative	0.340118	0.0173358	0.622129	0.0107096	-10.8175	0.0468325	-6.16445	0.996347	1.00407	0.173115	-3.41054	0.213228	-3.06011	0.920912	1.0922	0.0635682	-6.09619	1.17972	22.906	6.25856	17.3598	0.707119	9.80694	94.3082	1
3156	PF08_0081	PF08_0081_v7.1_P2/2	conserved Plasmodium protein, unknown function	PF3D7_0813400	PF08_0081				Pf3D7_08_v3:658,493..662,095(-)	conserved Plasmodium protein, unknown function	1.6593e-10	5.83346e-08	4.30573e-07	0.196043	1.27488	0.019212	1.5725	0.0405985	1.47993	0.00326275	1.79107	0.000780365	1.97273	0.301747	1.213	0.360752	-1.20006	20.5802	17.4293	47.7333	5.77503	12.9668	7.84398	4.1135	1
52	PF08_0082	PF08_0082_v7.1_P1/2	conserved Plasmodium protein, unknown function	PF3D7_0813100	PF08_0082				Pf3D7_08_v3:647,316..649,304(-)	conserved Plasmodium protein, unknown function	1.12682e-11	0.990036	8.47128e-12	0.00141348	3.48715	0.00195856	3.34034	0.0374066	2.17826	0.16313	-1.6692	0.00274793	-3.19246	0.86271	-1.06463	0.0867648	1.96929	25.0833	80.9289	0.000158269	7.29486e-05	31.2837	72.0957	15.6711	1
1271	PF08_0083	PF08_0083_v7.1_P2/2	conserved Plasmodium protein, unknown function	PF3D7_0813000	PF08_0083				Pf3D7_08_v3:643,086..644,885(-)	conserved Plasmodium protein, unknown function	8.21684e-08	0.0261073	3.37702e-06	0.20525	1.42408	0.0764156	1.64914	0.0908533	1.61025	0.500047	1.20515	0.908195	1.03231	0.203329	-1.42628	0.411203	-1.27568	12.5248	23.441	5.41101	1.44673	10.6076	14.1806	9.09047	1
2969	PF08_0084	PF08_0084_v7.1_P1/1	RNA-binding protein (U1 snRNP-like), putative	PF3D7_0812700	PF08_0084				Pf3D7_08_v3:633,990..634,697(+)	U1 small nuclear ribonucleoprotein C, putative	1.27872e-07	4.63424e-05	0.000238842	0.897113	-1.01671	0.116151	1.22768	0.287073	1.14752	0.385344	1.11839	0.0820157	1.2561	0.0441101	1.30472	0.0945193	1.26358	12.0535	4.87333	21.773	1.25757	6.5158	1.88171	1.96378	1
417	PF08_0085	PF08_0085_v7.1_P1/1	ubiquitin conjugating enzyme, putative	PF3D7_0812600	PF08_0085				Pf3D7_08_v3:631,584..632,229(-)	ubiquitin-conjugating enzyme E2, putative	0.0982756	4.25036e-06	0.00376538	0.30876	1.22632	0.00638366	1.77527	0.00205563	1.93292	0.710308	-1.07676	0.0857541	1.41823	0.00830173	1.73924	0.0170193	1.69841	1.91105	1.8608	29.8857	4.15714	4.32141	3.00556	4.72944	1
146	PF08_0086	PF08_0086_v7.1_P1/3	RNA binding protein, putative	PF3D7_0812500	PF08_0086				Pf3D7_08_v3:626,069..628,945(-)	RNA-binding protein, putative	0.000218267	0.516019	0.138797	0.018133	-1.78392	0.322913	-1.26346	0.727971	1.0852	0.598558	-1.1319	0.251616	-1.31246	0.335878	1.25555	0.000163299	-2.8749	5.65496	7.67668	0.43079	0.0835433	1.80223	1.74754	6.59363	1
3721	PF08_0087	PF08_0087_v7.1_P2/2	karyopherin alpha	PF3D7_0812400	PF08_0087				Pf3D7_08_v3:621,805..623,442(-)	karyopherin alpha	2.80642e-06	0.0619238	3.61777e-08	0.265409	-1.16594	0.177317	-1.20537	0.200166	-1.19379	0.74016	1.04638	0.0848597	1.27208	0.00822968	1.46304	0.00253628	1.60396	9.07351	4.16601	3.7267	0.24444	16.1992	5.31266	2.23011	1
2671	PF08_0088	PF08_0088_v7.1_P2/2	conserved Plasmodium protein, unknown function	PF3D7_0812300	PF08_0088				Pf3D7_08_v3:618,843..620,228(-)	sporozoite surface protein 3, putative	1.7919e-11	1.31307e-05	6.41703e-11	0.215457	-1.28987	0.646748	-1.09773	0.262884	1.25807	0.00368588	-1.87562	2.59421e-07	-3.63715	0.00819471	-1.76173	0.923181	1.02116	24.2553	24.6359	25.9079	3.75921	26.9283	19.5363	4.93337	1
373	PF08_0089	PF08_0089_v7.1_P7/8	conserved Plasmodium protein, unknown function	PF3D7_0812100	PF08_0089				Pf3D7_08_v3:604,923..612,878(+)	conserved protein, unknown function	0.18165	0.153967	0.107521	0.54339	-1.18244	0.796019	1.07372	0.49605	1.20665	0.898024	1.03588	0.454223	1.22958	0.224466	1.40181	0.00158206	2.72436	1.55796	2.89994	2.12629	0.565401	1.97535	2.62632	9.04091	1
1597	PF08_0091	PF08_0091_v7.1_P2/4	conserved Plasmodium protein, unknown function	PF3D7_0811600	PF08_0091				Pf3D7_08_v3:582,983..586,953(-)	conserved Plasmodium protein, unknown function	5.883e-12	0.000227147	9.29738e-14	1.16697e-06	4.17102	1.34779e-06	4.12267	5.08252e-08	5.38839	0.549709	-1.15754	0.0906944	-1.52438	0.684414	1.10435	0.322041	1.29708	26.2818	38.4837	17.0009	3.55628	43.0658	45.0428	7.11217	1
40	PF08_0092	PF08_0092_v7.1_P2/3	histone-arginine methyltransferase, putative	PF3D7_0811500	PF08_0092				Pf3D7_08_v3:579,483..582,221(+)	histone-arginine methyltransferase CARM1, putative	2.6034e-11	2.90763e-10	6.88136e-05	0.156378	1.32173	0.00334736	1.83537	0.0280372	1.55527	0.0179673	1.61373	0.000144369	2.27862	0.0408032	1.50567	0.0860832	1.43862	23.6046	21.8352	77.1242	10.1918	7.6138	5.03075	4.49303	1
199	PF08_0093	PF08_0093_v7.1_P2/2	mitochondrial carrier protein, putative	PF3D7_0811100	PF08_0093				Pf3D7_08_v3:557,884..559,506(-)	mitochondrial carrier protein, putative	2.87777e-10	0.0369712	4.30343e-07	0.000481673	2.14194	0.147098	1.34008	0.801056	1.05138	0.936756	1.0159	0.284272	1.23942	0.0097133	1.71705	4.70547e-05	2.67268	19.7423	19.1935	4.71503	0.654853	12.9675	9.00504	4.72214	1
1312	PF08_0094	PF08_0094_v7.1_P3/3	cullin-like protein, putative	PF3D7_0811000	PF08_0094				Pf3D7_08_v3:554,437..557,205(+)	cullin-1, putative	1.58317e-08	0.0230812	2.58852e-07	0.104836	1.7948	0.121588	1.74601	0.781533	-1.10309	0.0213232	-2.33322	0.0935462	-1.83237	0.551191	-1.23528	0.714204	1.14863	14.389	44.2787	5.66285	2.48944	13.5938	29.8799	14.9467	1
789	PF08_0095	PF08_0095_v7.1_P2/2	dihydropteroate synthetase	PF3D7_0810800	PF08_0095				Pf3D7_08_v3:548,200..550,616(+)	hydroxymethyldihydropterin pyrophosphokinase-dihydropteroate synthase	2.50774e-14	0.0011877	1.78784e-15	0.00614838	-2.17789	1.76425e-06	-4.63959	0.103982	-1.56061	0.923108	1.02624	0.15697	1.47047	0.119137	1.531	0.101882	1.61419	38.3689	68.019	12.5216	3.17112	56.2833	71.2693	8.61057	1
810	PF08_0096	PF08_0096_v7.1_P3/3	RNA helicase, putative	PF3D7_0810600	PF08_0096				Pf3D7_08_v3:541,971..544,796(+)	ATP-dependent RNA helicase DBP1, putative	4.17181e-11	0.00034523	4.15193e-06	0.148162	-1.26987	0.26415	1.2012	0.79523	1.04314	0.871732	1.02661	0.0237069	1.46574	0.0651591	1.36031	0.0568103	-1.40545	22.8034	14.8479	15.8217	1.47171	10.3859	4.83038	3.16262	1
3099	PF08_0097	PF08_0097_v7.1_P2/2	conserved Plasmodium membrane protein, unknown function	PF3D7_0810400	PF08_0097				Pf3D7_08_v3:532,220..534,031(+)	aquaporin, putative	0.129723	0.0252173	0.236589	0.188488	-2.39329	0.0662902	-3.43442	0.903709	-1.08248	0.360167	-1.82792	0.267091	-2.08278	0.684377	1.30554	0.249899	-2.25639	1.7526	18.51	5.48163	8.27054	1.43591	10.8323	51.2983	1
3314	PF08_0099	PF08_0099_v7.1_P1/1	acyl-CoA binding protein, putative	PF3D7_0810000	PF08_0099				Pf3D7_08_v3:517,421..517,693(-)	acyl-CoA binding protein, putative	0.0337424	0.00167125	0.267223	0.012273	-2.71582	0.0189976	-2.53531	0.137552	-1.77612	0.52294	-1.2761	0.0354846	-2.28685	0.520399	1.27802	0.00216915	-3.81802	2.51687	8.9684	11.6559	5.93336	1.35057	3.43751	17.3075	1
337	PF08_0101	PF08_0101_v7.1_P1/3	conserved Plasmodium protein, unknown function	PF3D7_0809400	PF08_0101				Pf3D7_08_v3:475,573..478,125(+)	conserved Plasmodium protein, unknown function	3.82999e-12	0.837302	9.08393e-13	0.000150718	2.2935	0.00114275	1.99666	0.00496493	-1.7947	0.402166	-1.17954	0.328947	1.21262	0.528852	1.13184	0.333693	1.22637	27.0987	25.6421	0.0428181	0.00578807	36.7249	24.822	4.59606	1
853	PF08_0102	PF08_0102_v7.1_P2/4	asparagine-rich antigen Pfa55-14	PF3D7_0809200	PF08_0102				Pf3D7_08_v3:467,943..471,893(-)	asparagine-rich antigen Pfa55-14	6.26415e-14	5.19875e-11	9.40562e-11	0.213925	-1.14021	0.207116	1.14252	0.00444649	1.3712	0.0408634	1.24637	0.00112686	1.44566	1.72686e-07	1.96909	0.015443	1.32636	36.0623	9.66715	88.829	3.40174	26.1622	5.00946	1.30204	1
134	PF08_0103	PF08_0103_v7.1_P2/6	erythrocyte membrane protein 1, PfEMP1	PF3D7_0809100	PF08_0103				Pf3D7_08_v3:459,312..466,567(+)	erythrocyte membrane protein 1, PfEMP1	6.28901e-16	3.85078e-25	2.15293e-13	1.84411e-10	14.0592	2.592e-12	22.8621	9.17884e-15	46.7165	1.75298e-15	58.6804	2.66703e-13	30.1631	7.20731e-09	9.52379	3.92583e-06	5.66533	49.0176	106.784	792.285	246.569	40.6307	63.2238	10.5812	1
1669	PF08_0106	PF08_0106_v7.1_P7/7	erythrocyte membrane protein 1, PfEMP1	PF3D7_0808700	PF08_0106				Pf3D7_08_v3:440,408..448,062(+)	erythrocyte membrane protein 1, PfEMP1	0.000279978	3.76626e-08	1.1522e-06	2.46973e-05	-2.0128	1.02363e-07	-2.62028	0.202856	-1.20467	0.582769	1.08278	0.0429369	-1.35199	0.00668237	-1.51326	0.00645798	-1.56038	5.48246	2.81578	49.8245	3.65569	11.8047	4.33063	2.49462	1
644	PF08_0107	PF08_0107_v7.1_P5/7	erythrocyte membrane protein 1, PfEMP1	PF3D7_0808600	PF08_0107				Pf3D7_08_v3:431,165..439,051(+)	erythrocyte membrane protein 1, PfEMP1	6.74081e-06	0.00011931	0.00574405	0.145058	-1.26247	5.1685e-05	-2.06143	0.913783	-1.01719	0.223937	1.21357	0.60802	-1.08426	0.0375579	-1.40243	0.220934	-1.2316	8.31842	5.07345	18.8769	1.64473	4.0104	1.74712	2.9624	1
368	PF08_0108	PF08_0108_v7.1_P2/2	plasmepsin X	PF3D7_0808200	PF08_0108				Pf3D7_08_v3:416,344..418,065(-)	plasmepsin X	2.4043e-13	0.693474	7.75618e-15	0.214995	1.67743	0.00710646	3.23085	0.0334945	2.47725	0.0200443	2.71549	3.20747e-05	-7.10671	0.00227041	-3.86258	0.483974	-1.36303	32.8904	137.674	0.158016	0.0944902	51.0132	152.524	20.3313	1
2394	PF08_0109	PF08_0109_v7.1_P2/2	proteasome subunit alpha type 5, putative	PF3D7_0807800	PF08_0109				Pf3D7_08_v3:399,591..401,360(-)	26S proteasome regulatory subunit RPN10, putative	0.301698	4.7487e-06	0.192622	3.67116e-06	2.04616	0.00293398	1.51594	0.0309969	1.33927	0.233336	1.17059	0.298964	1.14673	0.0224586	1.364	0.000486046	1.70798	1.25447	0.52793	29.4826	1.77248	1.57827	0.474425	2.04407	1
2007	PF08_0110	PF08_0110_v7.1_P1/1	Rab GTPase 18	PF3D7_0807300	PF08_0110				Pf3D7_08_v3:381,564..382,847(+)	ras-related protein Rab-18	0.0430617	0.826095	0.241345	0.155988	-1.49342	0.947421	1.01853	0.0365513	-1.82521	0.0705333	1.67554	0.470073	1.22378	0.874651	-1.04492	0.0181923	-2.08196	2.37844	4.53967	0.0490238	0.0133672	1.42202	1.93869	9.2707	1
1683	PF08_0111	PF08_0111_v7.1_P1/4	RNA helicase, putative	PF3D7_0807100	PF08_0111				Pf3D7_08_v3:372,902..376,867(-)	DNA helicase PSH3	5.40195e-08	0.511212	0.000461947	0.0283128	-1.47551	0.296887	-1.19711	0.66649	1.07663	0.151974	-1.28259	0.181583	-1.26063	0.511087	1.11939	0.0618562	-1.41989	12.983	9.35223	0.440805	0.0453617	5.96264	3.06798	3.49882	1
1481	PF08_0113	PF08_0113_v7.1_P2/3	vacuolar proton translocating ATPase subunit A, putative	PF3D7_0806800	PF08_0113				Pf3D7_08_v3:363,260..366,421(-)	V-type proton ATPase subunit a, putative	2.0076e-11	0.00454886	8.17621e-13	0.308292	-1.10947	0.753891	1.03225	0.782203	1.02838	0.588711	1.05636	0.130671	-1.16832	1.81042e-06	-1.78191	0.00136579	-1.45427	24.0558	6.06109	9.23189	0.332295	36.9995	6.65885	1.2238	1
204	PF08_0114	PF08_0114_v7.1_P8/8	conserved Plasmodium membrane protein, unknown function	PF3D7_0806700	PF08_0114				Pf3D7_08_v3:354,472..362,396(+)	conserved Plasmodium membrane protein, unknown function	3.40531e-10	9.92091e-08	1.16585e-07	0.0521444	-1.28245	0.128604	1.21232	0.000346005	1.63493	0.64867	1.05847	0.0466058	1.29082	0.00155202	1.53017	0.374234	1.12636	19.4915	7.43901	45.2673	2.46807	14.6144	3.98403	1.85375	1
1350	PF08_0115	PF08_0115_v7.1_P2/2	DnaJ protein, putative	PF3D7_0806500	PF08_0115				Pf3D7_08_v3:345,427..347,454(-)	DnaJ protein, putative	3.31283e-09	0.44397	5.76294e-11	0.0222169	1.38632	0.0124758	1.43287	0.36075	1.13462	0.0579831	1.30666	0.507469	1.09562	0.000376666	-1.71274	0.242278	-1.18938	16.3317	7.58074	0.599898	0.0397795	27.1468	9.00058	2.25456	1
3411	PF08_0116	PF08_0116_v7.1_P1/2	conserved Plasmodium protein, unknown function	PF3D7_0806100	PF08_0116				Pf3D7_08_v3:330,651..332,678(+)	conserved Plasmodium protein, unknown function	0.0329247	0.0390207	0.0655564	0.0425184	-1.9647	0.953051	1.01919	0.0324124	2.0437	0.355344	1.35021	0.852727	1.06177	0.0137843	2.29854	0.566231	-1.21949	2.53082	6.49038	4.60916	1.68862	2.30996	4.23141	12.4563	1
320	PF08_0117	PF08_0117_v7.1_P1/4	AAA family ATPase, putative	PF3D7_0806000	PF08_0117				Pf3D7_08_v3:326,215..330,004(-)	AAA family ATPase, putative	5.06765e-13	0.0242037	9.55493e-11	0.000445415	-1.52186	0.544911	-1.06827	0.339695	1.11025	0.440568	1.08793	0.0132054	1.32634	0.069994	1.22391	0.0277827	-1.30398	31.2368	9.09982	5.56544	0.231615	26.131	5.43743	1.41497	1
217	PF08_0118	PF08_0118_v7.1_P4/4	conserved Plasmodium protein, unknown function	PF3D7_0805300	PF08_0118				Pf3D7_08_v3:293,113..296,871(-)	conserved Plasmodium protein, unknown function	7.56253e-12	0.0218191	8.57493e-13	0.41244	1.36829	0.0158015	2.61174	0.164027	1.71168	0.131164	-1.7941	0.000118495	-5.16886	0.00103972	-3.87796	0.577067	-1.25542	25.8133	92.0588	5.77871	2.94412	36.8751	93.935	17.3222	1
1435	PF08_0119	PF08_0119_v7.1_P1/1	conserved Plasmodium protein, unknown function	PF3D7_0805200	PF08_0119				Pf3D7_08_v3:290,902..291,183(+)	gamete release protein, putative	7.21196e-13	8.29848e-05	1.26907e-15	0.093287	1.86103	0.00028349	4.28661	9.49097e-06	6.48801	1.57222e-06	8.05146	0.0178214	-2.44904	0.00643215	-2.84214	0.473106	-1.32179	30.4791	98.4991	19.9687	9.21894	57.5809	132.917	15.6968	1
170	PF08_0120	PF08_0120_v7.1_P1/2	GTPase activator, putative	PF3D7_0804900	PF08_0120				Pf3D7_08_v3:279,711..281,186(-)	GTPase-activating protein, putative	3.2997e-07	9.34577e-07	1.38214e-06	0.000101676	1.71167	0.000255078	1.64677	0.00414692	1.45577	0.0230696	1.33743	0.746385	1.04064	0.537777	1.07901	0.00639018	1.46169	11.0826	4.13134	35.6725	1.8997	11.597	3.08791	1.81063	1
3544	PF08_0121	PF08_0121_v7.1_P1/1	peptidyl-prolyl cis-trans isomerase precursor	PF3D7_0804800	PF08_0121				Pf3D7_08_v3:278,381..279,034(+)	peptidyl-prolyl cis-trans isomerase	1.22171e-09	4.80482e-07	2.2762e-05	0.0174404	-1.5241	0.0976451	1.33269	0.0284748	1.4708	0.788591	1.04663	0.00821048	1.60542	0.000327308	1.96176	0.808127	-1.04511	17.6659	12.5451	38.3856	3.89411	8.65457	4.38991	3.4492	1
1118	PF08_0123	PF08_0123_v7.1_P2/2	U2 snRNA/tRNA pseudouridine synthase, putative	PF3D7_0804600	PF08_0123				Pf3D7_08_v3:268,856..270,696(-)	tRNA pseudouridine synthase, putative	2.53734e-10	8.4699e-08	0.00015411	0.487549	-1.09733	0.0101423	1.43375	0.276557	1.15759	0.161596	1.20846	0.000395325	1.68218	0.0338567	1.3399	0.721838	1.05209	19.9315	8.71746	45.9935	2.87374	6.89403	2.15375	2.12437	1
876	PF08_0124	PF08_0124_v7.1_P2/3	conserved Plasmodium protein, unknown function	PF3D7_0804000	PF08_0124				Pf3D7_08_v3:237,853..241,048(+)	cactin homolog, putative	0.00126338	0.101126	0.000392352	0.0069417	-1.52891	0.0176045	-1.44573	0.010687	-1.49046	0.867539	-1.02514	0.394977	1.13573	0.690732	-1.06107	0.197055	1.23096	4.48309	2.44356	2.8396	0.221108	6.0978	2.37406	2.64745	1
2835	PF08_0125	PF08_0125_v7.1_P1/2	tubulin gamma chain	PF3D7_0803700	PF08_0125				Pf3D7_08_v3:231,398..232,756(+)	tubulin gamma chain	4.18166e-12	0.416649	5.22085e-09	0.0696092	1.66351	0.900894	1.03467	0.426026	-1.24465	0.543241	1.18153	0.142857	1.50298	0.0119779	2.05695	0.0553858	1.77912	26.9298	49.631	0.67614	0.178016	19.0689	25.1025	8.9516	1
973	PF08_0126	PF08_0126_v7.1_P3/4	DNA repair protein rad54, putative	PF3D7_0803400	PF08_0126				Pf3D7_08_v3:212,252..215,971(+)	DNA repair and recombination protein RAD54, putative	8.56073e-07	0.2454	1.9572e-06	0.204349	1.7089	0.0194021	2.76255	0.913191	-1.04653	0.176428	-1.77117	0.264101	-1.60028	0.915203	-1.04542	0.487706	-1.3642	10.1577	43.4981	1.39716	0.854719	11.2057	34.2757	20.7996	1
1219	PF08_0127	PF08_0127_v7.1_P2/4	conserved Plasmodium protein, unknown function	PF3D7_0803100	PF08_0127				Pf3D7_08_v3:199,181..202,918(-)	U3 small nucleolar RNA-associated protein 14, putative	5.67514e-11	0.636959	0.00257409	0.00426342	-1.56526	0.644551	-1.07046	0.291469	-1.16968	0.344819	-1.15042	0.611197	-1.07794	0.466324	-1.11378	0.000170701	-1.93508	22.2922	11.9116	0.226792	0.0173121	4.60665	1.75823	2.59537	1
744	PF08_0128	PF08_0128_v7.1_P1/2	SYF2 splicing factor, putative	PF3D7_0803000	PF08_0128				Pf3D7_08_v3:196,581..198,614(+)	peptidyl-prolyl cis-trans isomerase	8.6801e-08	5.95168e-05	0.00655167	0.581821	-1.06942	0.0063118	1.42107	0.00783818	1.40649	0.204188	-1.16913	0.646577	-1.05743	0.00940554	1.39418	0.3269	1.13696	12.4657	4.53618	20.9901	1.09117	3.91469	1.01752	1.76748	1
2418	PF08_0129	PF08_0129_v7.1_P1/2	serine/threonine protein phosphatase, putative	PF3D7_0802800	PF08_0129				Pf3D7_08_v3:191,976..194,103(+)	serine/threonine protein phosphatase 2B catalytic subunit A	1.77728e-11	0.954761	1.0921e-12	0.00999108	2.91598	0.000987779	4.11205	0.000772954	4.25633	0.0216086	-2.57135	0.00463796	-3.28288	0.513693	-1.29544	0.417519	1.41073	24.2697	93.2397	0.00326608	0.00179252	36.2487	99.4718	18.6602	1
2019	PF08_0130	PF08_0130_v7.1_P3/4	rRNA processing WD-repeat protein, putative	PF3D7_0802300	PF08_0130				Pf3D7_08_v3:167,069..170,434(-)	periodic tryptophan protein 2, putative	1.86416e-14	1.12923e-07	1.74554e-10	0.267944	-1.1898	0.391471	1.14332	0.245382	1.20009	0.0147423	1.48658	1.9265e-05	2.15025	0.0501636	1.36799	0.0895389	-1.33416	39.1431	23.2775	44.6778	3.79555	24.959	10.6018	2.88843	1
90	PF08_0131	PF08_0131_v7.1_P1/1	1-cys peroxiredoxin	PF3D7_0802200	PF08_0131				Pf3D7_08_v3:165,416..166,078(+)	1-cys peroxiredoxin	5.07825e-12	0.269026	3.46322e-08	0.0336941	2.11162	0.0827825	-1.82879	0.269739	-1.46069	0.974108	-1.0111	0.0480245	1.99911	0.0937366	1.7902	0.134664	1.73893	26.5595	75.6592	1.26263	0.513829	16.2605	33.0863	13.8364	1
447	PF08_0132	PF08_0132_v7.1_P4/4	glutamate dehydrogenase, putative	PF3D7_0802000	PF08_0132				Pf3D7_08_v3:146,089..150,282(+)	glutamate dehydrogenase, putative	1.38259e-11	0.0958279	1.51611e-09	0.0560095	1.47149	0.619278	-1.10285	0.575544	1.1167	0.339401	1.20825	0.00560224	1.78151	0.00848358	1.72555	0.290289	1.25132	24.7154	23.5282	2.9342	0.399037	21.0784	14.3328	4.62383	1
3398	PF08_0134	PF08_0134_v7.1_P1/1	conserved Plasmodium protein, unknown function	PF3D7_0801600	PF08_0134				Pf3D7_08_v3:109,180..109,557(-)	conserved Plasmodium protein, unknown function	1.03552e-13	0.115002	9.32688e-12	0.0301035	1.82958	0.036259	1.78937	1.18791e-05	-3.92503	0.32007	-1.30905	0.261049	1.35667	0.0870527	1.60041	0.695895	1.11904	34.8475	61.9931	2.61645	0.664946	31.0649	39.4741	8.64077	1
2307	PF08_0135	PF08_0135_v7.1_P2/2	conserved Plasmodium protein, unknown function	PF3D7_0801500	PF08_0135				Pf3D7_08_v3:106,593..108,242(-)	nucleolar protein 10, putative	1.48395e-10	0.000260302	4.75397e-06	0.64057	-1.09104	0.684588	1.07872	0.740799	1.06362	0.245534	1.24427	0.00833674	1.67884	0.341738	1.19522	0.483657	-1.1503	20.7534	17.7304	16.6137	2.02767	10.2419	6.25005	4.14963	1
279	PF08_0137	PF08_0137_v7.1_P2/4	Plasmodium exported protein (PHISTc), unknown function	PF3D7_0801000	PF08_0137				Pf3D7_08_v3:84,568..88,422(-)	Plasmodium exported protein (PHISTc), unknown function	3.97778e-08	0.0777553	1.30845e-06	0.0868098	-1.65532	0.320237	1.33414	0.753751	-1.09459	0.0743706	1.69239	0.0674918	1.71563	0.328276	-1.32773	0.00635388	-2.43198	13.3243	27.183	3.30813	0.964135	11.6593	16.9901	9.90909	1
1464	PF08_0139	PF08_0139_v7.1_P1/2NU	rifin	?	?	?	?	?	?	?	0.00261032	1.45733e-15	0.00186394	0.000273477	-7.14851	0.000494207	-6.46596	2.7024e-08	-32.3263	4.82981e-08	-29.3509	4.19617e-08	-30.0437	0.000175448	-7.70074	2.85428e-06	-18.1913	4.02673	23.6182	192.55	161.339	4.85277	20.3309	28.4888	1
1222	PF08_0141	PF08_0141_v7.1_P6/9	erythrocyte membrane protein 1, PfEMP1	PF3D7_0800200	PF08_0141				Pf3D7_08_v3:29,700..39,033(-)	erythrocyte membrane protein 1, PfEMP1	0.00836058	0.389538	0.0120818	0.143212	-3.0407	0.79003	1.22038	0.00121059	13.7473	0.839603	-1.16341	0.401895	-1.87749	0.595723	1.48805	0.591349	-1.53725	3.32357	45.7147	0.759694	1.49277	3.47621	34.153	66.8086	1
1255	PF08_0142	PF08_0142_v7.1_P5/6NU	erythrocyte membrane protein 1, PfEMP1	PF3D7_0800100	PF08_0142				Pf3D7_08_v3:21,361..28,653(+)	erythrocyte membrane protein 1, PfEMP1	9.26565e-07	0.1483	0.231272	0.467932	1.12987	0.000221424	-1.9883	0.0591708	1.38366	0.0396747	1.42737	0.140856	1.28503	0.0342041	1.44341	0.00753206	1.65747	10.0832	6.96733	2.18795	0.215978	1.45174	0.716525	3.35622	1
2524	PF08_28S:rRNA	PF08_28S_p	ncRNA	?	?	?	?	?	?	?	4.14247e-13	0.379672	2.1535e-08	0.0260971	1.87032	0.224625	-1.39498	0.010523	-2.07254	0.147763	-1.48981	0.00188834	2.47632	0.00156248	2.52314	0.106499	1.61135	31.6768	57.31	0.792264	0.204768	16.9369	21.8875	8.7876	1
2824	PF08_tmp2	PF08_TMP2_v7.1_P1/1	product unspecified	PF3D7_0801200	PF08_tmp2				Pf3D7_08_v3:98,890..99,051(-)	5.8S ribosomal RNA	0.0044256	0.20391	0.111592	0.0018237	-7.53296	0.057715	-3.23108	0.87939	1.09558	0.921678	-1.06093	0.199173	2.18544	0.364616	1.73092	0.68803	-1.29498	3.70374	32.9781	1.67806	2.13449	1.9502	12.4032	43.248	1
2672	PF08TR004	PF08TR004_v7.1_P1/3	product unspecified	PF3D7_0829800	PF08TR004				Pf3D7_08_v3:1,272,718..1,275,456(+)	unspecified product	2.50907e-07	0.0106512	0.000394526	0.935068	-1.02266	0.608229	-1.15169	0.407014	1.25756	0.559339	-1.17463	0.000100388	3.32705	0.000182466	3.14609	0.446385	1.25209	11.3578	21.1372	7.30553	1.94226	6.09321	8.09976	9.03931	1
2795	PF08TR005	PF08TR005_v7.1_P2/3	product unspecified	PF3D7_0829900	PF08TR005				Pf3D7_08_v3:1,275,625..1,278,795(+)	unspecified product	4.27965e-10	0.831526	3.26384e-05	0.103147	1.66368	0.568322	-1.19137	0.0411501	-1.90623	0.511442	-1.22346	0.0206237	2.09167	0.00373458	2.57641	0.214966	1.50768	19.1548	44.1942	0.0459618	0.0151491	8.30852	13.6925	11.2064	1
1527	PF09TR005	PF09TR005_v7.1_P1/2	product unspecified	?	?	?	?	?	?	?	2.79091e-08	0.867064	2.42779e-10	0.437564	1.49518	0.0141568	3.75959	0.0178658	3.5769	0.730296	-1.1948	0.00241246	-5.35843	0.216566	-1.90546	0.24681	-1.90612	13.7271	89.894	0.0284459	0.0266117	24.3346	113.828	31.8077	1
1929	PF10_0001	PF10_0001_v7.1_P3/7	erythrocyte membrane protein 1, PfEMP1	PF3D7_1000100	PF10_0001				Pf3D7_10_v3:28,490..36,164(+)	erythrocyte membrane protein 1, PfEMP1	4.62604e-05	0.25488	0.0792016	0.909617	-1.02337	0.00483978	-1.83862	0.0103279	1.73079	0.125337	1.37366	0.239187	1.27384	0.167528	1.32966	0.191903	1.33317	6.78181	6.91347	1.34128	0.195331	2.18205	1.58887	4.95144	1
2271	PF10_0002	PF10_0002_v7.1_P2/2	rifin	PF3D7_1000200	PF10_0002				Pf3D7_10_v3:38,050..39,395(-)	rifin	0.000224144	7.22456e-13	1.69412e-05	0.000193606	-3.58298	0.031143	-1.98718	6.43522e-10	-13.378	8.55831e-08	-7.9269	0.000107765	-3.80997	0.0418917	-1.90749	4.49326e-05	-4.60418	5.63645	13.1324	123.608	41.1421	8.94336	14.8837	11.3167	1
3014	PF10_0006	PF10_0006_v7.1_P1/2	rifin	PF3D7_1000600	PF10_0006				Pf3D7_10_v3:51,349..52,599(-)	rifin	2.13473e-08	0.860596	3.91495e-08	0.146971	-1.87934	0.100779	-2.04846	0.486272	-1.34883	0.274048	1.60415	0.381127	1.4582	0.603588	1.24958	0.788882	-1.13048	14.0373	63.3551	0.0313119	0.0201887	16.0889	51.8676	21.9219	1
2808	PF10_0013	PF10_0013_v7.1_P1/1	Plasmodium exported protein (hyp12), unknown function	PF3D7_1001000	PF10_0013				Pf3D7_10_v3:63,152..64,032(+)	Plasmodium exported protein (hyp12), unknown function	1.27822e-09	0.000526602	6.31246e-10	5.51417e-05	-7.89886	0.000459003	-5.69423	0.0714252	-2.30421	0.983229	-1.00954	0.517296	-1.34113	0.722963	1.17391	0.475048	-1.41393	17.6037	88.4695	14.6639	10.5279	22.5926	81.1012	24.4101	1
2652	PF10_0015	PF10_0015_v7.1_P1/1	acyl-CoA binding protein, isoform 1, ACBP1	PF3D7_1001100	PF10_0015				Pf3D7_10_v3:67,807..68,961(-)	acyl-CoA binding protein, isoform 1, ACBP1	7.05556e-15	0.497538	2.60461e-13	0.740734	-1.11275	0.114614	1.67969	0.0409105	1.97515	0.269286	1.43285	0.368101	-1.33928	4.65738e-06	-5.70315	0.28005	-1.45619	41.7759	107.019	0.470215	0.172082	40.0949	73.3663	12.4428	1
39	PF10_0016	PF10_0016_v7.1_P1/1	acyl-CoA binding protein, isoform 2, ACBP2	PF3D7_1001200	PF10_0016				Pf3D7_10_v3:70,547..70,819(-)	acyl-CoA binding protein, isoform 2, ACBP2	2.52267e-14	0.0743148	2.35325e-12	0.00110129	3.13177	0.00107648	-3.14003	0.0903862	-1.74714	0.968079	1.01299	0.134066	1.63457	0.153839	1.59516	0.00529309	2.77281	38.3535	98.1794	3.39043	1.23986	34.3179	62.7491	12.4336	1
3706	PF10_0017	PF10_0017_v7.1_P1/1	Plasmodium exported protein (PHISTa), unknown function	PF3D7_1001300	PF10_0017				Pf3D7_10_v3:72,934..73,917(-)	Plasmodium exported protein (PHISTa), unknown function	6.00707e-13	0.110561	9.70518e-14	0.85483	1.03991	0.644671	-1.10383	3.5372e-05	-2.74554	0.0145204	-1.72779	0.118521	1.40494	0.00951946	1.79222	0.00325014	2.0517	30.8697	34.7508	2.68435	0.431692	42.9383	34.5263	5.46781	1
700	PF10_0018	PF10_0018_v7.1_P2/3	alpha/beta hydrolase, putative	PF3D7_1001400	PF10_0018				Pf3D7_10_v3:74,661..77,572(-)	exported lipase 1	2.09016e-15	6.22038e-06	2.22273e-12	0.429694	1.29267	0.353561	1.3527	0.00850617	2.45271	0.00287752	2.80609	0.00375291	2.71702	0.131312	-1.64317	0.127033	-1.71103	45.2916	116.701	28.5121	10.4951	34.4584	63.4197	12.5152	1
176	PF10_0019	PF10_0019_v7.1_P1/1	early transcribed membrane protein 10.1	PF3D7_1001500	PF10_0019				Pf3D7_10_v3:81,416..81,739(-)	early transcribed membrane protein 10.1	4.52825e-11	0.260665	1.08836e-09	0.013117	-2.9231	0.0387932	-2.41278	0.414067	-1.40329	0.312218	1.52247	0.322859	1.50841	0.00783111	-3.18374	0.00415732	-3.84228	22.6663	95.0492	1.30845	0.783843	21.6421	64.8247	20.368	1
2547	PF10_0020	PF10_0020_v7.1_P2/3	alpha/beta hydrolase, putative	PF3D7_1001600	PF10_0020				Pf3D7_10_v3:86,538..89,009(-)	exported lipase 2	1.08675e-14	5.88856e-09	1.35117e-14	0.00817784	2.03775	0.0173485	1.88493	0.000149	-2.94974	1.00806e-05	-3.71462	3.6777e-05	-3.32756	0.0111592	-1.97417	0.0962123	-1.58962	40.5868	65.099	59.3235	13.5931	49.1353	56.2931	7.79059	1
2918	PF10_0021	PF10_0021_v7.1_P1/1	Plasmodium exported protein (PHISTc), unknown function	PF3D7_1001700	PF10_0021				Pf3D7_10_v3:92,573..93,526(-)	Plasmodium exported protein (PHISTc), unknown function	0.128786	0.14124	0.177462	0.154623	-3.53715	0.442074	-1.96394	0.246266	2.78382	0.118015	-4.02183	0.199153	-3.11538	0.49445	-1.82098	0.104896	-4.69072	1.75676	33.0425	2.26877	6.0961	1.63456	21.9601	91.3569	1
3847	PF10_0022	PF10_0022_v7.1_P1/1	Plasmodium exported protein (PHISTc), unknown function	PF3D7_1001800	PF10_0022				Pf3D7_10_v3:96,113..97,031(-)	Plasmodium exported protein (PHISTc), unknown function	2.97814e-11	0.243033	2.19994e-11	0.0315424	-1.73364	0.377219	1.24547	0.0150205	1.87476	0.199643	-1.37837	0.0013953	-2.34852	0.0283831	-1.75364	0.00238028	-2.36586	23.3739	35.1385	1.41155	0.303145	29.1666	31.3192	7.30187	1
927	PF10_0023	PF10_0023_v7.1_P1/1	Plasmodium exported protein (hyp16), unknown function	PF3D7_1001900	PF10_0023				Pf3D7_10_v3:99,379..100,361(-)	Plasmodium exported protein (hyp16), unknown function	2.33547e-11	6.60832e-08	4.17343e-10	0.311707	1.32522	0.00448402	2.30395	0.000160689	3.2005	0.000763902	2.75598	0.0048596	2.28447	0.309589	-1.32688	0.538698	-1.19968	23.7924	44.6771	47.1471	12.6475	23.335	31.2988	9.12071	1
2562	PF10_0024	PF10_0024_v7.1_P1/2	Plasmodium exported protein (hyp2), unknown function	PF3D7_1002000	PF10_0024				Pf3D7_10_v3:103,118..104,683(-)	Plasmodium exported protein (hyp2), unknown function	4.05129e-13	0.0681776	1.25645e-12	0.0679546	-2.49401	0.947798	1.03249	0.255257	1.75232	0.333218	1.60935	0.0356046	-2.88874	6.42614e-06	-13.2379	0.0274871	-3.2994	31.7257	186.19	3.54843	2.97498	35.8896	150.448	28.5054	1
2153	PF10_0025	PF10_0025_v7.1_P2/2	PF70 protein	PF3D7_1002100	PF10_0025				Pf3D7_10_v3:106,653..108,662(-)	EMP1-trafficking protein	9.05358e-14	6.33902e-06	2.89973e-14	0.128964	1.60592	0.00213959	2.75002	4.60576e-05	4.14187	0.000141048	3.68848	0.218532	1.46468	0.00253418	-2.6978	0.138785	-1.6378	35.1687	81.4066	28.4448	9.40608	46.6497	77.1301	11.2431	1
2191	PF10_0026	PF10_0026_v7.1_P1/3	tryptophan-rich antigen 3	PF3D7_1002200	PF10_0026				Pf3D7_10_v3:112,929..116,015(+)	tryptophan-rich antigen 3	2.67102e-14	0.000201474	1.19678e-11	0.624075	-1.06682	0.763177	-1.04053	0.00441953	-1.49009	0.615683	-1.06851	0.449734	1.10518	0.174785	-1.19873	0.0352663	-1.35878	38.206	16.323	17.3446	1.05861	30.5035	9.30869	2.07515	1
836	PF10_0028-a	PF10_0028-A_v7.1_P1/1	RNA binding protein, putative	?	?	?	?	?	?	?	0.224056	0.0797179	0.818776	0.00781877	-12.3401	0.360692	-2.27873	0.715818	1.38586	0.134658	-3.90493	0.370787	-2.2395	0.659379	1.48478	0.00932713	-13.7277	1.43442	28.3091	3.263	9.19959	0.438056	6.1752	95.8584	1
758	PF10_0029	PF10_0029_v7.1_P1/1	conserved Plasmodium protein, unknown function	PF3D7_1002500	PF10_0029				Pf3D7_10_v3:123,770..124,882(-)	conserved Plasmodium protein, unknown function	5.71568e-07	0.0276678	3.14406e-08	0.000176846	1.9624	0.0706864	-1.34829	0.250825	-1.20574	0.369958	1.15663	0.00147793	1.74014	0.115307	1.2954	0.174532	1.26798	10.5435	6.75398	5.29331	0.484399	16.3966	7.50241	3.11139	1
1285	PF10_0030	PF10_0030_v7.1_P1/2	conserved Plasmodium protein, unknown function	PF3D7_1002600	PF10_0030				Pf3D7_10_v3:125,939..127,600(+)	conserved Plasmodium protein, unknown function	1.59147e-13	0.00904373	1.5682e-11	0.0135599	1.69214	0.229962	-1.28006	0.0097773	-1.73834	0.0485552	-1.51174	0.995699	-1.0011	0.0792017	1.44126	0.0161201	1.7277	33.837	34.4795	7.66638	1.116	29.904	21.7656	4.94938	1
1845	PF10_0031	PF10_0031_v7.1_P1/3	conserved Plasmodium protein, unknown function	PF3D7_1002700	PF10_0031				Pf3D7_10_v3:129,276..132,110(+)	conserved Plasmodium protein, unknown function	2.94628e-07	0.3596	2.97827e-08	0.328096	1.18126	0.116089	1.31092	0.000196343	2.01516	0.00769902	-1.60903	0.346503	-1.17383	0.0465933	1.41443	0.0619874	1.41396	11.1959	7.88195	0.862452	0.0867385	16.4733	8.28374	3.41945	1
1154	PF10_0033	PF10_0033_v7.1_P1/1	conserved Plasmodium protein, unknown function	PF3D7_1002900	PF10_0033				Pf3D7_10_v3:138,765..139,853(+)	conserved Plasmodium protein, unknown function	0.00481821	0.434779	9.63643e-06	0.0473413	-1.52573	0.804802	-1.05247	0.0286716	1.5986	0.619379	1.10841	0.615571	-1.10965	0.79873	1.05418	0.984162	-1.0044	3.6524	3.84508	0.624715	0.0939529	9.50848	7.15006	5.11337	1
2621	PF10_0034	PF10_0034_v7.1_P4/4	conserved Plasmodium protein, unknown function	PF3D7_1003100	PF10_0034, PF10_0034a	PF10_0034a			Pf3D7_10_v3:147,639..148,239(+)	conserved Plasmodium protein, unknown function	1.16969e-13	0.0383876	2.37006e-14	0.00612055	2.60171	0.00377276	2.76546	0.0102654	2.43255	0.00818193	-2.50606	4.47031e-05	-4.61901	0.144689	-1.62953	0.984028	1.00708	34.5585	92.3402	4.6412	1.77161	47.2954	90.2666	12.9783	1
68	PF10_0034a	PF10_0034A_v7.1_P1/1	conserved Plasmodium protein, unknown function	?	?	?	?	?	?	?	1.37953e-05	0.141982	9.4783e-05	0.208024	1.67594	0.00764537	3.12974	0.240983	1.61631	0.695901	-1.17187	0.481711	1.33137	0.305818	1.5194	0.813521	1.10766	7.72805	31.2457	2.26005	1.30539	7.32419	21.152	19.6382	1
2433	PF10_0037	PF10_0037_v7.1_P4/6	conserved Plasmodium protein, unknown function	PF3D7_1003400	PF10_0037				Pf3D7_10_v3:152,364..158,516(-)	conserved Plasmodium protein, unknown function	1.40486e-11	0.111888	1.87568e-12	0.0194049	2.39509	0.0176431	2.42969	0.00620729	2.825	0.0226411	-2.33946	1.66119e-05	-5.95109	0.290341	-1.46564	0.915859	1.04133	24.6868	78.107	2.66374	1.20398	34.8793	78.8251	15.3676	1
1116	PF10_0038	PF10_0038_v7.1_P1/1	40S ribosomal protein S20e, putative	PF3D7_1003500	PF10_0038				Pf3D7_10_v3:160,316..160,962(-)	40S ribosomal protein S20e, putative	1.23634e-07	0.0132745	2.47215e-05	0.103112	-1.39405	0.497381	-1.14575	0.76507	1.06157	0.032083	1.55787	0.227458	1.27607	0.211895	1.28705	0.437617	-1.18122	12.089	11.8779	6.82718	0.958282	8.57466	6.01781	4.77233	1
2658	PF10_0039	PF10_0039_v7.1_P1/1	membrane skeletal protein IMC1-related	PF3D7_1003600	PF10_0039				Pf3D7_10_v3:164,945..165,790(+)	inner membrane complex protein 1c, putative	9.52902e-12	3.53347e-06	1.55664e-13	0.244988	-1.61	0.525016	1.29503	0.90946	-1.0472	0.871341	1.06789	3.65583e-08	-17.2104	4.11913e-05	-6.64817	0.00560191	-3.57113	25.3881	102.751	30.5635	17.6709	41.557	120.135	19.6578	1
393	PF10_0041	PF10_0041_v7.1_P4/4	U5 small nuclear ribonuclear protein, putative	PF3D7_1003800	PF10_0041				Pf3D7_10_v3:172,723..176,430(-)	U5 small nuclear ribonucleoprotein component, putative	8.3845e-08	0.000172629	0.00027187	0.0120184	-1.80945	0.260618	1.2913	0.0790147	1.4988	0.340642	1.24107	0.0457058	1.58965	0.00172253	2.13927	0.0465873	-1.63787	12.503	15.5949	17.7913	3.17013	6.40567	5.70697	6.05829	1
1662	PF10_0043	PF10_0043_v7.1_P1/1	60S ribosomal protein L13, putative	PF3D7_1004000	PF10_0043				Pf3D7_10_v3:179,344..180,226(-)	60S ribosomal protein L13, putative	4.29863e-05	0.000608583	0.000183907	0.000171355	-3.12663	0.00134122	-2.56984	0.0112114	-2.06353	0.628983	1.14076	0.089048	-1.6045	0.39159	-1.26414	0.0161105	-2.07767	6.83746	12.4586	14.2744	3.71564	6.74037	8.77261	8.85022	1
376	PF10_0045	PF10_0045_v7.1_P1/9	conserved Plasmodium membrane protein, unknown function	PF3D7_1004200	PF10_0045				Pf3D7_10_v3:187,669..196,954(-)	WD repeat-containing protein, putative	1.3313e-15	0.00323971	2.19194e-09	1.88287e-07	2.96185	0.010029	-1.57587	0.102735	-1.32266	0.272711	-1.20433	0.418588	-1.14631	0.166225	1.26609	0.00300854	1.76777	46.6603	32.4105	10.0345	0.995721	20.4641	10.1532	3.3738	1
436	PF10_0046	PF10_0046_v7.1_P2/4	zinc finger, C3HC4 type, putative	PF3D7_1004300	PF10_0046				Pf3D7_10_v3:199,452..202,844(-)	E3 ubiquitin-protein ligase, putative	2.5976e-06	0.00739508	0.00830065	0.261329	-1.17364	0.33249	1.14775	0.0119847	1.45083	0.793454	1.03768	0.180281	-1.21138	0.222233	1.1904	0.491594	-1.10981	9.14193	4.48633	8.11657	0.569021	3.74387	1.31234	2.38361	1
1362	PF10_0047	PF10_0047_v7.1_P3/3	RNA binding protein, putative	PF3D7_1004400	PF10_0047				Pf3D7_10_v3:207,000..209,642(-)	RNA-binding protein, putative	3.75822e-13	1.28254e-06	1.4011e-12	0.121509	-1.35132	9.55978e-06	-2.678	0.000407124	-2.1025	0.737971	1.06603	0.679331	1.08225	0.96874	-1.00751	0.975304	-1.00634	31.8911	28.6269	34.4193	4.41375	35.6125	22.8338	4.35998	1
2376	PF10_0048	PF10_0048_v7.1_P1/1	conserved Plasmodium protein, unknown function	PF3D7_1004500	PF10_0048				Pf3D7_10_v3:213,986..214,594(-)	conserved Plasmodium protein, unknown function	1.09167e-16	4.11293e-05	1.45537e-13	2.56079e-06	2.38612	0.239162	1.20307	0.00439243	-1.60148	0.0018534	-1.68363	0.0182606	-1.46617	0.683508	-1.06551	0.022853	1.48182	54.9435	32.6764	22.1507	1.88195	41.7513	17.7362	2.88868	1
3746	PF10_0052	PF10_0052_v7.1_P1/1	conserved Plasmodium protein, unknown function	PF3D7_1004900	PF10_0052				Pf3D7_10_v3:224,248..225,207(+)	conserved Plasmodium protein, unknown function	3.21353e-10	0.00617555	1.1383e-08	0.0156857	2.42902	0.33478	1.40688	0.00109634	-3.47199	0.133126	-1.71064	0.8209	-1.08285	0.948398	-1.02301	0.438112	1.33998	19.5776	59.5249	8.52554	3.70309	17.8745	38.8191	14.768	1
200	PF10_0053	PF10_0053_v7.1_P2/3	methionine-tRNA ligase, putative	PF3D7_1005000	PF10_0053				Pf3D7_10_v3:225,456..227,705(-)	methionine--tRNA ligase, putative	2.463e-11	4.77677e-07	0.000981589	0.971217	1.00387	0.000183087	1.5619	0.581093	1.06097	0.952595	-1.00638	0.000499489	1.50495	0.624788	1.05383	0.461748	1.08821	23.7003	6.67955	38.41	1.54646	5.35332	1.07768	1.36891	1
1150	PF10_0054	PF10_0054_v7.1_P2/4	conserved protein, unknown function	PF3D7_1005100	PF10_0054				Pf3D7_10_v3:228,798..232,193(+)	U3 small nucleolar RNA-associated protein 25, putative	2.9741e-13	0.0401691	3.53709e-07	0.00145633	-1.78811	0.822055	1.03875	0.461673	-1.13303	0.628054	1.08547	0.0668659	1.37381	0.507123	1.11903	2.86051e-05	-2.37729	32.4113	22.78	4.55247	0.457094	13.207	6.63027	3.4138	1
2006	PF10_0056	PF10_0056_v7.1_P1/1	conserved Plasmodium protein, unknown function	PF3D7_1005400	PF10_0056				Pf3D7_10_v3:234,795..235,745(-)	conserved Plasmodium protein, unknown function	0.169871	0.737952	0.793846	0.26653	-2.10738	0.905066	-1.08252	0.090027	3.16285	0.0662745	-3.49792	0.868068	1.11678	0.277516	2.07146	0.260726	-2.24082	1.59702	17.3693	0.113783	0.176787	0.472803	3.67302	52.8266	1
1229	PF10_0057	PF10_0057_v7.1_P1/5	regulator of nonsense transcripts, putative	PF3D7_1005500	PF10_0057				Pf3D7_10_v3:237,506..242,245(-)	regulator of nonsense transcripts 1, putative	2.17911e-15	4.42629e-08	1.37951e-08	0.790643	-1.0375	9.64277e-05	-1.83621	0.147314	-1.2263	0.0649252	-1.30007	0.409889	-1.12163	0.810204	-1.03386	0.53967	1.0954	45.1669	21.3492	49.0464	3.31185	17.5882	5.9382	2.29584	1
807	PF10_0057a	PF10_0057A_v7.1_P2/3	DnaJ protein, putative	PF3D7_1005600	PF10_0057a, PF10_0058	PF10_0058			Pf3D7_10_v3:244,145..246,535(-)	DnaJ protein, putative	2.49804e-11	0.000358552	0.000117261	0.160437	-1.20223	0.0185271	1.37368	0.273918	1.15342	0.769557	-1.03863	0.101046	1.24152	0.125425	1.22342	0.309371	-1.15211	23.6759	9.7415	15.7166	0.923803	7.13447	2.09678	1.99848	1
3357	PF10_0060	PF10_0060_v7.1_P1/2	conserved Plasmodium protein, unknown function	PF3D7_1005900	PF10_0060				Pf3D7_10_v3:253,704..255,611(+)	conserved Plasmodium protein, unknown function	0.091174	0.0242739	0.228161	0.0231385	-5.80894	0.0728133	-3.93316	0.257366	2.34455	0.142177	-3.0387	0.0746632	-3.89722	0.937944	1.05973	0.189088	-2.88554	1.95366	26.6971	5.55952	10.8531	1.46117	14.2622	66.3737	1
2846	PF10_0062	PF10_0062_v7.1_P1/1	NOT family protein, putative	PF3D7_1006100	PF10_0062				Pf3D7_10_v3:259,060..260,304(-)	CCR4-NOT transcription complex subunit 5, putative	0.161985	4.89648e-06	0.555362	0.141049	1.58143	0.276784	1.39957	0.0812708	1.72711	0.0297007	1.99416	0.000283137	3.42388	0.00947887	2.30796	0.0106594	2.40777	1.62461	3.75336	29.3716	9.69393	0.803128	1.32534	11.2215	1
3177	PF10_0063	PF10_0063_v7.1_P1/1	DNA/RNA-binding protein Alba, putative	PF3D7_1006200	PF10_0063				Pf3D7_10_v3:262,150..262,997(-)	DNA/RNA-binding protein Alba 3	5.27606e-05	8.17336e-08	0.0257918	3.32183e-05	-2.3295	0.00112556	-1.877	0.000100908	-2.17936	0.00363528	-1.73824	0.0406543	-1.45736	0.00475915	-1.70682	0.0025102	-1.85416	6.68267	5.22745	46.1581	5.15809	2.9465	1.64633	3.79945	1
1882	PF10_0065	PF10_0065_v7.1_P1/1	conserved Plasmodium protein, unknown function	PF3D7_1006500	PF10_0065				Pf3D7_10_v3:270,535..271,497(+)	conserved Plasmodium protein, unknown function	0.678372	0.0139433	0.957795	0.054417	-5.88365	0.160035	-3.58828	0.947182	-1.06116	0.040182	-6.67109	0.301897	-2.54079	0.875637	1.15058	0.0470434	-7.09667	0.691711	13.6697	6.72152	18.976	0.205779	2.90476	95.9879	1
1790	PF10_0066	PF10_0066_v7.1_P1/1	thioredoxin, putative	PF3D7_1006600	PF10_0066				Pf3D7_10_v3:272,243..272,824(-)	phosducin-like protein, putative	2.39906e-10	0.000186788	1.12629e-09	0.0197019	1.47215	0.25217	1.20209	0.868211	-1.02677	0.0954832	1.31121	0.00211836	1.69152	0.000894219	1.77763	0.11928	1.30988	20.0162	12.4811	17.5628	1.56447	21.5834	9.61309	3.02867	1
945	PF10_0067	PF10_0067_v7.1_P2/2	conserved Plasmodium protein, unknown function	PF3D7_1006700	PF10_0067				Pf3D7_10_v3:274,091..275,426(+)	conserved Plasmodium protein, unknown function	3.14826e-11	7.88012e-07	2.83786e-06	0.858405	1.03526	0.0481573	1.48451	0.219096	1.27293	0.218268	1.2735	0.000723868	2.04688	0.125614	1.35345	0.606177	-1.11318	23.2791	21.5996	36.3578	4.81925	10.7963	7.15529	4.50672	1
2162	PF10_0068	PF10_0068_v7.1_P1/1	RNA binding protein, putative	PF3D7_1006800	PF10_0068				Pf3D7_10_v3:277,621..279,168(+)	single-strand telomeric DNA-binding protein GBP2, putative	0.161852	0.373458	0.636614	0.0628721	-3.92943	0.145524	-2.88656	0.38902	1.86064	0.549054	-1.53829	0.508875	-1.60815	0.856449	-1.1385	0.124385	-3.31543	1.62509	20.5532	0.813413	1.46965	0.686928	6.20562	61.4303	1
3502	PF10_0069	PF10_0069_v7.1_P1/1	PPPDE peptidase, putative	PF3D7_1006900	PF10_0069				Pf3D7_10_v3:281,459..283,104(+)	PPPDE peptidase, putative	7.95713e-09	0.0065552	5.03974e-07	0.000765995	-1.54756	0.0334331	-1.29938	0.898526	1.01529	0.0486973	-1.27322	0.990573	1.00141	0.140372	1.19524	0.0554878	1.28461	15.2218	5.30624	8.38954	0.417794	12.7766	3.18132	1.69318	1
3623	PF10_0070	PF10_0070_v7.1_P1/1	conserved Plasmodium membrane protein, unknown function	PF3D7_1007000	PF10_0070				Pf3D7_10_v3:284,577..286,302(+)	conserved membrane protein, unknown function	0.00969501	0.000707136	0.00849837	0.0143771	2.54432	0.417404	1.34603	0.0534142	2.0634	0.242319	1.53837	0.0917746	1.87401	0.062507	2.00801	0.0122765	2.78301	3.23634	10.5912	13.8742	6.48637	3.72696	8.71201	15.8954	1
1704	PF10_0071	PF10_0071_v7.1_P1/2	rhoGAP GTPase, putative	PF3D7_1007200	PF10_0071				Pf3D7_10_v3:288,383..290,826(-)	rho GTPase-activating protein, putative	5.29209e-12	0.0115648	4.54555e-12	0.156649	1.64048	0.0611378	1.9383	0.0510346	1.9961	0.00632525	-2.70366	0.00133106	-3.30395	0.126186	-1.70877	0.376794	-1.38703	26.4814	77.2409	7.12576	2.9692	32.7299	68.1905	14.1673	1
964	PF10_0072	PF10_0072_v7.1_P2/2	conserved Plasmodium protein, unknown function	PF3D7_1007300	PF10_0072				Pf3D7_10_v3:293,850..295,999(+)	RING zinc finger protein, putative	9.46168e-10	0.00173459	1.17988e-10	0.955955	-1.02736	0.754095	1.16555	0.00928847	3.81148	0.0255332	-3.1055	1.61143e-06	-16.595	0.0984671	-2.28002	0.541247	-1.37722	18.0203	105.924	11.5628	9.70944	25.716	107.971	28.5503	1
3514	PF10_0073	PF10_0073_v7.1_P1/1	conserved Plasmodium protein, unknown function	PF3D7_1007500	PF10_0073, PF10_0073a	PF10_0073a			Pf3D7_10_v3:298,361..298,687(+)	conserved Plasmodium protein, unknown function	4.1931e-05	1.69184e-08	8.09734e-06	0.725801	-1.0805	0.0910239	-1.46344	0.115586	-1.4241	0.0598877	-1.53137	5.30152e-06	-3.25663	0.00115618	-2.17457	0.00074144	-2.38172	6.85635	8.20787	53.7931	9.19953	9.68642	8.28271	5.81458	1
3431	PF10_0074	PF10_0074_v7.1_P1/1	conserved Plasmodium protein, unknown function	PF3D7_1007600	PF10_0074				Pf3D7_10_v3:299,280..299,609(+)	conserved Plasmodium protein, unknown function	0.000118319	0.0171559	0.00233223	0.000616554	-1.44309	0.0906725	-1.18442	0.60846	-1.05154	0.00235071	-1.37657	0.0720312	-1.19779	0.399729	1.08643	0.154829	-1.16322	6.08875	1.43678	6.28055	0.211721	4.68149	0.789077	1.14616	1
1413	PF10_0075	PF10_0075_v7.1_P2/5	transcription factor with AP2 domain(s), putative	PF3D7_1007700	PF10_0075				Pf3D7_10_v3:301,126..305,919(-)	AP2 domain transcription factor AP2-I	8.21225e-12	0.480334	5.84999e-08	0.00401721	2.05384	0.149018	-1.41106	0.944629	-1.01645	0.333829	1.25689	0.0659012	1.55765	0.413278	1.21309	0.782123	-1.07197	25.661	34.8594	0.509249	0.0988277	15.5354	15.0744	6.59822	1
2465	PF10_0077	PF10_0077_v7.1_P1/2	eukaryotic translation initiation factor 3 subunit 7, putative	PF3D7_1007900	PF10_0077				Pf3D7_10_v3:316,649..318,280(+)	eukaryotic translation initiation factor 3 subunit D, putative	3.44498e-09	0.036752	3.76176e-06	0.0906199	-1.26022	0.582611	-1.07647	0.369205	-1.12846	0.162542	1.20874	0.0459245	1.31673	0.440727	1.10915	0.140479	-1.23895	16.2809	7.17129	4.72672	0.297426	10.4915	3.30085	2.13943	1
814	PF10_0078	PF10_0078_v7.1_P7/7	histone deacetylase, putative	PF3D7_1008000	PF10_0078				Pf3D7_10_v3:321,011..328,150(+)	histone deacetylase 2	5.54559e-07	0.431454	2.93148e-06	0.37095	-1.06515	0.0929331	1.12787	0.00691451	1.22159	0.085424	-1.13124	0.00968688	-1.21022	0.561319	1.04168	0.0532149	1.16072	10.5727	1.27941	0.633897	0.0109583	10.761	0.930137	0.587767	1
42	PF10_0079	PF10_0079_v7.1_P4/11	conserved Plasmodium protein, unknown function	PF3D7_1008100	PF10_0079				Pf3D7_10_v3:331,246..342,807(+)	zinc finger protein, putative	3.33995e-05	0.00307689	0.0110009	0.227309	-1.10449	0.360172	-1.07786	0.0943383	-1.14925	0.329797	-1.0832	0.00272787	-1.29859	0.0341084	-1.19537	0.768989	1.02591	7.03047	1.14727	10.1582	0.236809	3.54267	0.412936	0.792614	1
2931	PF10_0081	PF10_0081_v7.1_P2/2	26S proteasome regulatory subunit 4, putative	PF3D7_1008400	PF10_0081				Pf3D7_10_v3:347,206..348,667(-)	26S protease regulatory subunit 4, putative	5.17512e-09	3.05362e-08	0.000221353	0.91295	-1.01173	0.00304973	-1.40182	0.272075	-1.12546	0.0514579	-1.23827	7.43838e-05	-1.61126	0.107478	-1.19128	0.690286	1.04653	15.7597	4.41153	50.8465	2.03332	6.58081	1.31581	1.35964	1
693	PF10_0082	PF10_0082_v7.1_P3/4	conserved Plasmodium membrane protein, unknown function	PF3D7_1008500	PF10_0082				Pf3D7_10_v3:351,703..355,593(+)	conserved Plasmodium membrane protein, unknown function	2.42105e-11	0.644729	6.56665e-13	0.502426	1.07549	0.0447413	1.25075	2.8647e-05	1.67929	0.0570767	-1.23548	0.0137838	-1.32161	0.88356	-1.01597	0.0894826	1.22217	23.73	6.83153	0.216444	0.00890159	37.5767	7.727	1.3983	1
2073	PF10_0084	PF10_0084_v7.1_P2/2	tubulin beta chain	PF3D7_1008700	PF10_0084				Pf3D7_10_v3:360,625..362,480(-)	tubulin beta chain	1.05453e-14	0.014755	1.093e-11	0.00135914	2.1167	0.020313	1.68731	0.000918091	-2.18221	0.312525	-1.24644	0.887765	-1.03103	0.726559	1.07871	0.617572	1.12273	40.6687	46.9023	6.60045	1.08745	30.7068	25.2953	5.60164	1
828	PF10_0085	PF10_0085_v7.1_P2/2	small subunit rRNA processing protein, putative	PF3D7_1008800	PF10_0085				Pf3D7_10_v3:365,737..367,146(-)	nucleolar protein 5, putative	6.41373e-09	2.5996e-05	1.17052e-06	0.363921	1.21274	0.0431357	1.55325	0.914462	-1.02294	0.00989852	1.7731	0.00231399	1.99449	0.749241	1.06987	0.135647	-1.40844	15.4897	16.996	23.6288	3.7038	11.7866	9.23771	5.32947	1
3266	PF10_0086	PF10_0086_v7.1_P1/1	adenylate kinase	PF3D7_1008900	PF10_0086				Pf3D7_10_v3:369,199..370,225(-)	adenylate kinase	4.31531e-07	0.490448	4.37804e-08	0.0137118	-1.45217	0.011388	-1.46813	0.0802554	-1.29531	0.583201	1.08275	0.110245	1.26534	0.290325	1.16667	0.462025	-1.1209	10.8172	5.56435	0.48602	0.0357155	15.9335	5.85442	2.49851	1
3632	PF10_0087	PF10_0087_v7.1_P1/1	diphthine synthase	PF3D7_1009000	PF10_0087				Pf3D7_10_v3:371,293..372,117(+)	diphthine methyl ester synthase, putative	0.00108205	0.619463	0.0279142	0.0066773	-2.82656	0.10201	-1.83015	0.69811	-1.15106	0.980264	-1.009	0.896866	-1.04809	0.329709	1.42708	0.0104906	-2.83354	4.5825	14.8032	0.251197	0.115923	2.892	6.67302	15.6904	1
2971	PF10_0089	PF10_0089_v7.1_P2/3	small subunit rRNA synthesis-associated protein, putative	PF3D7_1009200	PF10_0089				Pf3D7_10_v3:374,864..377,611(+)	small subunit rRNA synthesis-associated protein, putative	6.79199e-11	3.42545e-09	2.1066e-06	0.809734	-1.04628	0.0252578	1.54706	0.00365488	1.78969	0.0150332	1.61206	0.000799437	1.98626	0.00362442	1.79075	0.348158	-1.20877	21.998	19.0961	62.2999	7.72595	11.124	6.89753	4.21642	1
2994	PF10_0090	PF10_0090_v7.1_P2/2	conserved Plasmodium protein, unknown function	PF3D7_1009300	PF10_0090				Pf3D7_10_v3:377,906..379,708(-)	conserved Plasmodium protein, unknown function	6.06329e-06	0.0791602	0.000158099	5.67964e-06	-1.88288	0.0514579	-1.26857	0.064005	-1.25308	0.0870805	-1.23074	0.500871	-1.08348	0.0940769	1.22504	0.203883	-1.17727	8.40775	2.91604	3.2757	0.1623	6.87172	1.70236	1.68459	1
1106	PF10_0091	PF10_0091_v7.1_P1/2	zinc finger protein, putative	PF3D7_1009400	PF10_0091				Pf3D7_10_v3:381,361..382,449(+)	zinc finger protein, putative	5.54663e-05	0.202862	0.0116792	0.00217211	-1.63744	0.604394	-1.08084	0.282913	1.17608	0.37708	-1.1423	0.805117	-1.03766	0.579917	1.08662	1.23882e-05	-2.25235	6.64515	3.66755	1.68604	0.132935	3.50021	1.37987	2.68072	1
85	PF10_0092	PF10_0092_v7.1_P1/2	metallopeptidase, putative	PF3D7_1009500	PF10_0092				Pf3D7_10_v3:383,044..384,793(-)	metalloprotease, putative	0.303663	0.254452	0.0801607	0.00216574	13.2309	0.979886	1.01996	0.830285	-1.18305	0.858869	-1.14962	0.857169	1.15158	0.536259	1.62623	0.638368	1.48371	1.25046	18.916	1.34374	2.90386	2.17392	23.4894	73.4748	1
872	PF10_0093	PF10_0093_v7.1_P1/1	protein phosphatase, putative	PF3D7_1009600	PF10_0093				Pf3D7_10_v3:386,976..388,442(+)	protein phosphatase PPM10, putative	4.53081e-12	0.216622	1.21456e-10	0.00214112	-2.35418	0.0187825	-1.88875	0.505063	-1.18958	0.546121	1.17012	0.0246978	1.83242	0.0201589	1.87417	0.0940718	-1.60719	26.7764	44.4062	1.58497	0.375503	25.6594	30.3956	8.05512	1
1773	PF10_0094	PF10_0094_v7.1_P2/2	tubulin-tyrosine ligase, putative	PF3D7_1009700	PF10_0094				Pf3D7_10_v3:389,504..391,165(-)	tubulin--tyrosine ligase, putative	5.92664e-15	0.0301965	7.6756e-16	0.000948756	3.00952	0.00108741	2.96483	0.0153698	2.1746	0.0365324	-1.93983	6.71752e-08	-8.07159	0.123295	-1.61774	0.26763	1.44302	42.2645	97.8058	5.11717	1.69169	59.5326	98.4048	11.2401	1
366	PF10_0095	PF10_0095_v7.1_P3/4	conserved Plasmodium membrane protein, unknown function	PF3D7_1009800	PF10_0095				Pf3D7_10_v3:393,765..397,993(-)	conserved Plasmodium membrane protein, unknown function	5.23264e-16	1.16682e-07	1.80323e-10	0.0193883	-1.3175	0.302033	1.12495	0.064036	1.23993	0.0717904	1.23218	4.87446e-05	1.68591	0.120143	1.19615	0.00407959	-1.44764	49.6116	15.6398	44.5294	2.00538	24.8969	5.60617	1.53119	1
1345	PF10_0096	PF10_0096_v7.1_P2/3	conserved Plasmodium protein, unknown function	PF3D7_1009900	PF10_0096				Pf3D7_10_v3:399,207..401,778(+)	conserved Plasmodium protein, unknown function	2.41465e-05	2.35175e-07	0.00235423	0.49418	1.12171	0.0642498	1.37416	0.146814	1.27985	0.525204	1.11258	0.00129115	1.79143	0.00104608	1.81426	0.137682	1.31008	7.2825	5.02318	41.4221	4.08161	4.67435	2.30299	3.35027	1
3481	PF10_0097	PF10_0097_v7.1_P1/1	mitochondrial ribosomal protein L22/L43, putative	PF3D7_1010000	PF10_0097				Pf3D7_10_v3:401,876..402,711(-)	ribosomal protein L43, mitochondrial, putative	0.00122449	1.25353e-08	0.0202209	9.37925e-06	-2.78362	0.00140411	-1.9825	0.00115167	-2.01077	0.00511689	-1.80213	0.0467886	-1.50082	0.264505	-1.25014	0.00272517	-1.97403	4.50309	4.35517	55.3293	7.64455	3.11501	2.15192	4.6976	1
2735	PF10_0098	PF10_0098_v7.1_P1/1	conserved Plasmodium protein, unknown function	PF3D7_1010100	PF10_0098				Pf3D7_10_v3:403,679..404,575(+)	PI31 domain-containing protein, putative	0.0141403	0.019004	0.132602	0.511521	1.19982	0.150468	1.49772	0.118098	1.55314	0.373745	1.28082	0.606689	-1.15337	0.376772	1.2788	0.115334	-1.60702	3.01598	5.67973	6.06576	1.63188	1.83325	2.46601	9.14704	1
1914	PF10_0099	PF10_0099_v7.1_P1/6	DNA2/NAM7 helicase. putative	PF3D7_1010200	PF10_0099				Pf3D7_10_v3:405,017..410,536(-)	DNA2/NAM7 helicase, putative	2.56767e-14	0.263862	1.44422e-10	0.000332313	-1.82414	0.141719	-1.25431	0.159666	-1.24177	0.527689	1.10088	0.0076611	1.53264	0.688935	-1.0627	0.000343294	-1.89797	38.3078	21.7053	1.29071	0.104474	25.3231	10.2487	2.75206	1
2186	PF10_0100	PF10_0100_v7.1_P1/1	conserved Plasmodium protein, unknown function	PF3D7_1010300	PF10_0100				Pf3D7_10_v3:414,732..415,328(+)	succinate dehydrogenase subunit 4, putative	1.04239e-14	0.17956	2.37579e-15	0.488812	-1.15088	0.0021477	1.94839	0.000583546	2.14187	0.483717	1.1528	0.00382643	-1.86532	0.0182629	-1.64535	0.251245	-1.28476	40.7002	40.9919	1.87785	0.270187	55.2264	39.7302	4.89196	1
2667	PF10_0103	PF10_0103_v7.1_P1/1	eukaryotic translation initiation factor 2 beta subunit, putative	PF3D7_1010600	PF10_0103				Pf3D7_10_v3:420,185..421,056(-)	eukaryotic translation initiation factor 2 subunit beta	7.88456e-07	1.6026e-08	0.000114798	0.192477	1.29759	0.0850023	1.41564	0.873915	-1.03182	0.00132242	1.98502	0.000701177	2.0758	0.00208058	1.9214	0.00960773	1.77682	10.2356	9.81273	54.0687	7.405	7.1533	4.89842	4.65649	1
3832	PF10_0105	PF10_0105_v7.1_P1/1	ribosomal protein, putative	PF3D7_1010800	PF10_0105				Pf3D7_10_v3:424,866..425,765(-)	50S ribosomal protein L22, mitochondrial, putative	0.000834518	0.551931	0.0132235	0.0488865	-2.62502	0.290635	-1.66051	0.875648	1.07733	0.603997	-1.28061	0.563425	1.31739	0.137794	2.05039	0.801484	1.13653	4.75084	26.4839	0.36101	0.287497	3.41239	13.5876	27.0765	1
2183	PF10_0111	PF10_0111_v7.1_P1/1	20S proteasome beta subunit, putative	PF3D7_1011400	PF10_0111				Pf3D7_10_v3:441,140..441,955(-)	proteasome subunit beta type-5	0.00937522	0.996819	0.0310695	0.820124	-1.07801	0.350486	-1.36386	0.767218	-1.10276	0.0337305	2.06544	0.768422	-1.10218	0.58762	1.19658	0.517989	1.25724	3.25606	8.73853	1.61303e-05	6.18431e-06	2.81839	5.40281	13.0355	1
913	PF10_0112	PF10_0112_v7.1_P1/1	conserved Plasmodium membrane protein, unknown function	PF3D7_1011500	PF10_0112				Pf3D7_10_v3:443,874..444,401(-)	conserved Plasmodium membrane protein, unknown function	1.66397e-07	0.00342716	7.97861e-09	0.000297884	2.64963	0.001155	2.359	0.0927465	1.51942	0.17592	1.39694	0.0680644	1.57738	0.0365366	-1.6929	0.462062	-1.21206	11.7785	17.2066	9.90016	2.0661	18.4123	19.2126	7.09557	1
2504	PF10_0114	PF10_0114_v7.1_P1/2	DNA repair protein RAD23, putative	PF3D7_1011700	PF10_0114				Pf3D7_10_v3:449,154..450,323(+)	DNA repair protein RAD23, putative	2.59055e-06	0.0437028	3.03363e-05	0.757874	1.03927	0.851914	1.02359	0.653876	1.05767	0.859531	1.02235	0.273838	1.14782	0.284314	1.14435	0.108886	1.2438	9.14434	3.50897	4.38865	0.24058	8.37819	2.29641	1.86384	1
3359	PF10_0115	PF10_0115_v7.1_P3/4	QF122 antigen	PF3D7_1011800	PF10_0115				Pf3D7_10_v3:455,398..458,817(+)	PRE-binding protein	4.6163e-08	1.05049e-14	8.57184e-05	2.29542e-08	-2.52734	5.65273e-06	-1.99163	9.43087e-09	-2.62934	0.000135753	-1.73599	4.79787e-06	-2.00566	2.90628e-06	-2.04915	9.19862e-09	-2.81419	13.1575	5.40594	167.82	9.85018	7.41457	2.17598	1.99562	1
2772	PF10_0116	PF10_0116_v7.1_P1/1	conserved Plasmodium protein, unknown function	PF3D7_1011900	PF10_0116				Pf3D7_10_v3:460,335..461,993(-)	heme oxygenase	1.19628e-14	6.71826e-05	1.02811e-08	2.43744e-05	2.25517	0.759622	-1.05272	0.130125	-1.2948	0.0711	-1.36386	0.0611707	-1.38059	0.289087	-1.19647	0.438301	1.14987	40.3265	27.941	20.6154	2.04054	18.0274	8.9219	3.36537	1
1492	PF10_0117	PF10_0117_v7.1_P3/3	ubiquitin-protein ligase e3, putative	PF3D7_1012000	PF10_0117				Pf3D7_10_v3:463,493..467,006(+)	RING zinc finger protein, putative	3.20601e-10	0.01867	0.00860653	0.000169902	1.75513	0.218308	-1.18182	0.269043	1.16144	0.389045	-1.12324	0.147059	-1.21853	0.606209	-1.07176	0.0212762	1.41035	19.581	8.6765	6.10285	0.386317	3.71789	1.17673	2.15224	1
666	PF10_0118	PF10_0118_v7.1_P1/2	conserved Plasmodium protein, unknown function	PF3D7_1012100	PF10_0118				Pf3D7_10_v3:468,071..469,536(-)	conserved Plasmodium protein, unknown function	2.88344e-10	0.000378492	7.37968e-10	0.0520329	1.66077	0.547078	1.1656	0.000289403	-2.76661	0.584601	-1.14919	0.623851	-1.13279	0.0299965	-1.76943	0.620793	-1.14394	19.7393	31.2937	15.5668	3.52553	22.3169	25.2715	7.70025	1
2051	PF10_0119	PF10_0119_v7.1_P1/1	conserved Plasmodium protein, unknown function	PF3D7_1012200	PF10_0119				Pf3D7_10_v3:470,979..471,933(+)	rhoptry associated adhesin	1.68461e-11	1.48287e-08	1.77646e-12	0.766653	-1.13737	0.557286	-1.29052	0.931575	1.03792	0.0023188	-4.12475	3.97309e-09	-29.1892	0.00304781	-3.94708	0.149611	-1.97027	24.3642	112.673	54.4651	35.9821	35.015	115.662	22.4619	1
2861	PF10_0120	PF10_0120_v7.1_P1/1	ubiquinol-cytochrome c reductase complex subunit, putative	PF3D7_1012300	PF10_0120				Pf3D7_10_v3:472,546..473,386(-)	cytochrome b-c1 complex subunit 7, putative	4.67252e-05	0.00040715	0.00128494	0.347588	-1.60124	0.92654	1.04698	0.250714	-1.78173	0.0507844	-2.72067	0.0548544	-2.67212	0.239494	-1.80718	0.388074	-1.58724	6.77424	41.3365	15.3656	13.3944	5.14119	22.4083	29.6383	1
1960	PF10_0121	PF10_0121_v7.1_P1/1	hypoxanthine phosphoribosyltransferase	PF3D7_1012400	PF10_0121				Pf3D7_10_v3:475,327..476,563(-)	hypoxanthine-guanine phosphoribosyltransferase	2.472e-13	1.28671e-06	3.11469e-13	1.13144e-05	-2.65956	2.24149e-06	-2.94772	0.00264052	-1.85426	0.246345	-1.25169	0.904574	-1.02325	0.419063	1.16844	0.321765	-1.22699	32.8275	29.696	34.4066	4.44635	39.5971	25.5856	4.39381	1
3442	PF10_0122	PF10_0122_v7.1_P1/2	phosphoglucomutase, putative	PF3D7_1012500	PF10_0122				Pf3D7_10_v3:478,758..480,539(-)	phosphoglucomutase, putative	6.39536e-05	0.000534646	3.05885e-06	0.0844579	-1.42748	0.4974	-1.14724	0.356927	1.20565	0.125907	1.36915	0.000367643	2.20807	0.00417231	1.8498	0.122856	1.40315	6.53886	6.54899	14.6229	2.09223	10.7147	7.66523	4.86467	1
2966	PF10_0123	PF10_0123_v7.1_P2/2	GMP synthetase	PF3D7_1012600	PF10_0123				Pf3D7_10_v3:482,527..484,194(-)	GMP synthase [glutamine-hydrolyzing]	6.99365e-12	0.0325846	1.10999e-06	0.0165812	-1.62468	0.367437	-1.1923	0.569528	-1.11693	0.516044	1.13471	0.0621923	1.44964	0.519101	1.13366	0.00950664	-1.76091	25.9584	24.0386	4.96504	0.656832	11.8476	7.83668	4.49791	1
877	PF10_0126	PF10_0126_v7.1_P2/2	conserved Plasmodium protein, unknown function	PF3D7_1012900	PF10_0126				Pf3D7_10_v3:496,331..497,573(-)	autophagy-related protein 18	0.00384306	0.00334209	0.29783	0.0362605	1.49434	0.298715	1.21463	0.748679	1.06131	0.624189	1.09537	0.166036	1.29794	0.726606	1.06711	0.0145701	1.66039	3.78939	3.21274	9.96014	1.20635	1.27373	0.771353	4.118	1
3835	PF10_0127	PF10_0127_v7.1_P1/2	conserved Plasmodium protein, unknown function	PF3D7_1013000	PF10_0127				Pf3D7_10_v3:500,210..502,221(+)	zinc finger protein, putative	1.27602e-05	0.000944975	4.40924e-06	0.0638504	1.19085	0.00661135	-1.30185	0.0315273	-1.22692	0.933713	-1.00767	0.00250741	-1.34662	0.915902	-1.00975	0.00209321	1.3836	7.79123	1.61775	13.1122	0.388941	10.3218	1.53085	1.00852	1
520	PF10_0128	PF10_0128_v7.1_P4/4	U3 snoRNA-associated small subunit rRNA processing protein, putative	PF3D7_1013100	PF10_0128				Pf3D7_10_v3:502,634..506,392(-)	U3 small nucleolar RNA-associated protein 13, putative	3.41923e-15	4.50542e-06	1.42219e-06	0.18527	-1.17612	0.0524954	1.27261	0.0739803	1.24755	0.634741	1.0592	0.0143159	1.36307	0.628341	1.06036	0.00499248	-1.46978	43.839	15.7612	29.6735	1.52405	11.5645	2.96982	1.74627	1
1165	PF10_0129	PF10_0129_v7.1_P2/3	conserved Plasmodium protein, unknown function	PF3D7_1013200	PF10_0129				Pf3D7_10_v3:511,084..514,278(+)	conserved Plasmodium protein, unknown function	5.97174e-09	0.00399625	5.9295e-08	0.0128921	1.55595	0.79872	-1.04424	0.0550368	-1.39743	0.981202	-1.00401	0.743913	-1.05704	0.110403	-1.31793	0.948314	-1.01183	15.5791	11.0372	9.53591	0.965112	15.517	7.85222	3.44108	1
1321	PF10_0132	PF10_0132_v7.1_P1/4	phosphoinositide specific phospholipase c, putative	PF3D7_1013500	PF10_0132				Pf3D7_10_v3:526,840..531,448(+)	phosphoinositide-specific phospholipase C	4.03633e-06	0.00533202	0.0290221	0.0149069	1.29209	0.194531	1.14136	0.0294082	1.25506	0.699945	1.0396	0.0673572	1.20779	0.00932082	1.31709	0.0135971	1.32052	8.75585	2.18301	8.8629	0.315672	2.86522	0.510256	1.21099	1
522	PF10_0134	PF10_0134_v7.1_P1/1	conserved Plasmodium protein, unknown function	PF3D7_1013700	PF10_0134				Pf3D7_10_v3:540,622..541,694(+)	conserved Plasmodium protein, unknown function	1.13565e-15	0.104322	2.61279e-14	3.34546e-08	4.03413	0.78301	1.05605	0.180769	-1.30795	0.696536	1.08034	0.0362884	1.5346	0.0144239	1.65965	0.00196969	2.02256	47.1513	45.4579	2.78521	0.383598	46.9823	32.3536	4.68271	1
1354	PF10_0135	PF10_0135_v7.1_P1/2	conserved Plasmodium protein, unknown function	PF3D7_1013800	PF10_0135				Pf3D7_10_v3:542,359..544,779(+)	conserved Plasmodium protein, unknown function	5.22883e-14	0.0243855	1.30459e-14	0.0127852	2.75943	0.00600722	3.10115	0.025688	2.4622	0.00315839	-3.41111	2.64825e-06	-8.77721	0.175823	-1.70559	0.441542	1.37918	36.5077	135.989	5.55014	2.95343	49.2522	131.044	18.0926	1
894	PF10_0136	PF10_0136_v7.1_P1/4	initiation factor 2 subunit family, putative	PF3D7_1013900	PF10_0136				Pf3D7_10_v3:545,679..548,903(-)	translation initiation factor eIF-2B subunit delta, putative	1.20152e-10	0.00112921	5.70083e-07	1.23003e-06	-2.01403	0.819532	-1.02775	0.000287282	1.61799	0.445709	-1.09621	0.518682	1.08074	0.0794431	1.24019	0.860738	-1.02275	21.0841	7.46418	12.6513	0.639829	12.6288	3.19345	1.71953	1
978	PF10_0138	PF10_0138_v7.1_P4/5	conserved Plasmodium protein, unknown function	PF3D7_1014100	PF10_0138				Pf3D7_10_v3:555,160..559,527(+)	merozoite surface protein MSA180, putative	3.88158e-16	0.00946778	4.50618e-17	0.141703	1.85893	0.0014936	4.15351	0.0384885	2.42868	0.564553	-1.27095	1.04861e-09	-30.7811	0.0115945	-3.0032	0.757949	-1.14668	50.5902	214.604	7.56485	4.58431	71.6852	217.207	20.6041	1
743	PF10_0140	PF10_0140_v7.1_P3/7	conserved protein, unknown function	PF3D7_1014300	PF10_0140				Pf3D7_10_v3:565,805..573,060(+)	SPRY domain-containing protein, putative	4.86429e-11	5.18279e-05	2.51119e-08	0.473385	1.2059	0.873487	1.0423	0.0280622	-1.80849	0.00696345	-2.09971	0.0623989	-1.64467	0.79997	-1.06817	0.666019	-1.12772	22.5471	37.5501	21.4215	5.09649	16.7161	19.8851	8.08912	1
2407	PF10_0141	PF10_0141_v7.1_P1/1	MO15-related protein kinase	PF3D7_1014400	PF10_0141				Pf3D7_10_v3:574,129..575,103(+)	MO15-related protein kinase	1.90416e-09	8.43853e-07	8.38192e-08	0.0552082	-1.35125	0.655413	1.07064	0.0522308	1.35664	0.147597	1.25191	0.000172486	1.89564	0.00612281	1.5577	0.151506	1.26847	17.0628	9.79661	36.0819	2.95949	15.0505	6.17231	2.78873	1
920	PF10_0142	PF10_0142_v7.1_P1/4	conserved Plasmodium protein, unknown function	PF3D7_1014500	PF10_0142				Pf3D7_10_v3:576,579..580,478(+)	conserved Plasmodium protein, unknown function	0.0646301	0.384397	0.683245	0.634791	-1.19064	0.620371	1.1996	0.397002	1.36655	0.91053	1.04208	0.489696	1.28948	0.178007	-1.6499	0.329106	-1.47012	2.1486	7.11236	0.776511	0.367204	0.622954	1.47294	16.0782	1
1399	PF10_0143	PF10_0143_v7.1_P1/8	transcriptional coactivator ADA2	PF3D7_1014600	PF10_0143				Pf3D7_10_v3:581,354..589,090(-)	transcriptional coactivator ADA2	0.0431024	7.55046e-05	0.0282091	0.607108	-1.05241	0.28921	1.11178	0.227286	-1.12864	0.0981021	-1.18221	0.000148445	-1.5223	0.0369348	-1.23831	0.0124827	-1.31991	2.37791	0.575244	20.2568	0.700052	2.88477	0.498471	1.175	1
3537	PF10_0144	PF10_0144_v7.1_P1/1	prohibitin, putative	PF3D7_1014700	PF10_0144				Pf3D7_10_v3:595,308..596,222(+)	prohibitin, putative	2.65714e-11	0.00977982	5.57073e-11	0.0276051	-2.34127	7.4373e-05	-5.28744	0.0923424	-1.89671	0.705473	1.15127	0.429345	1.34396	0.0673351	2.01064	0.28371	-1.53782	23.5695	80.4123	7.49321	3.6521	27.216	66.3237	16.5712	1
854	PF10_0146	PF10_0146_v7.1_P3/7	conserved Plasmodium protein, unknown function	PF3D7_1014900	PF10_0146				Pf3D7_10_v3:600,970..607,809(-)	conserved Plasmodium protein, unknown function	5.67199e-15	0.0034043	4.96944e-16	0.00326667	2.38568	9.5569e-05	3.36881	0.0615554	1.70096	0.00170891	-2.5492	2.81896e-07	-5.76342	0.0663761	-1.68397	0.969835	1.01125	42.3883	79.9214	9.91612	2.67092	61.2672	82.5119	9.15793	1
2511	PF10_0147	PF10_0147_v7.1_P1/1	FAD synthetase, putative	PF3D7_1015000	PF10_0147				Pf3D7_10_v3:611,213..612,199(+)	FAD synthetase, putative	4.588e-10	0.494059	1.0723e-08	8.45045e-07	2.95931	0.0316856	1.49893	0.319036	-1.20042	0.806644	1.04557	0.219297	-1.25366	0.208937	-1.26031	0.0395506	1.51194	19.0532	15.5275	0.477921	0.0556406	17.9641	10.4571	3.95835	1
2069	PF10_0148	PF10_0148_v7.1_P2/2	conserved protein, unknown function	PF3D7_1015100	PF10_0148				Pf3D7_10_v3:612,685..613,875(-)	CWC16 domain-containing protein, putative	0.571984	0.00281643	0.0263932	0.0588837	1.31273	0.0427609	1.34048	0.341108	1.14386	0.845629	-1.02769	0.793426	-1.03742	0.0310809	1.36769	0.00208433	1.64208	0.827183	0.400372	10.3713	0.71713	2.9306	1.01319	2.35095	1
1774	PF10_0149	PF10_0149_v7.1_P1/2	cysteinyl-tRNA synthetase, putative	PF3D7_1015200	PF10_0149				Pf3D7_10_v3:614,872..617,736(-)	cysteine--tRNA ligase	1.20939e-12	9.19873e-05	1.12741e-12	0.000299033	-1.73654	0.0749276	-1.28627	0.324311	-1.14687	0.171846	1.21076	1.32862e-06	2.23059	9.57139e-05	1.83243	0.0833239	-1.29868	29.397	13.7853	19.6565	1.3168	36.1669	12.1142	2.27769	1
1371	PF10_0150	PF10_0150_v7.1_P1/2	methionine aminopeptidase 1b, putative	PF3D7_1015300	PF10_0150				Pf3D7_10_v3:618,440..619,993(+)	methionine aminopeptidase 1b, putative	3.96022e-14	1.41844e-05	2.02483e-11	0.0169907	-1.53324	0.718249	-1.0639	0.276193	1.20735	0.0566648	1.39924	1.65589e-05	2.34761	0.0210799	1.50954	0.000653637	-1.97995	37.2022	26.9357	25.6455	2.65262	29.3459	15.1768	3.51675	1
1705	PF10_0151	PF10_0151_v7.1_P3/3	conserved Plasmodium protein, unknown function	PF3D7_1015400	PF10_0151				Pf3D7_10_v3:621,305..623,626(+)	conserved Plasmodium protein, unknown function	1.29896e-13	0.213762	1.74096e-11	0.00357398	2.3445	0.718134	1.10414	0.00332922	-2.36172	0.261606	-1.3644	0.400196	1.26098	0.0993709	1.58586	0.0131969	2.14038	34.3114	63.4864	1.60531	0.424331	29.6748	39.2195	8.98719	1
2820	PF10_0153	PF10_0153_v7.1_P1/2	heat shock protein 60	PF3D7_1015600	PF10_0153				Pf3D7_10_v3:627,044..629,040(-)	heat shock protein 60	5.87796e-14	7.02989e-06	4.93619e-13	0.0284286	-1.94442	6.96902e-07	-5.83454	0.00110205	-2.81776	0.752326	1.09684	0.630343	1.15153	0.329612	1.3329	0.779406	-1.09165	36.2187	76.3577	28.0776	8.45632	38.3394	57.7348	10.24	1
1327	PF10_0153a-a	PF10_0153A-A_v7.1_P1/1	tubulin binding cofactor c, putative	?	?	?	?	?	?	?	1.41918e-11	0.270104	2.78951e-10	1.89508e-05	4.94621	0.00640002	2.54782	0.0187486	-2.21335	0.69366	-1.13639	0.0478367	1.9362	0.0930303	1.74404	0.0158893	2.39487	24.6687	63.8217	1.25685	0.464524	24.0753	44.4903	12.5662	1
2695	PF10_0154	PF10_0154_v7.1_P1/1	ribonucleotide reductase small subunit, putative	PF3D7_1015800	PF10_0154				Pf3D7_10_v3:633,682..635,286(+)	ribonucleoside-diphosphate reductase small chain, putative	0.00248189	0.0707475	0.177297	0.388825	-1.75384	0.276224	-2.03849	0.718945	1.26306	0.286412	-2.00778	0.33352	-1.88017	0.681037	1.30582	0.654311	-1.36455	4.05798	41.9812	3.4804	5.14371	1.6352	12.0834	50.2488	1
441	PF10_0155	PF10_0155_v7.1_P1/2	enolase	PF3D7_1015900	PF10_0155				Pf3D7_10_v3:637,138..639,011(+)	enolase	4.71943e-09	0.0496652	3.04015e-10	0.0020692	-2.07557	0.0232435	-1.6826	0.60373	-1.12154	0.460899	1.17738	0.0211526	1.6976	0.00166187	2.1126	0.221585	1.33835	15.8766	19.0078	4.14284	0.708553	23.9158	20.4517	5.81505	1
1469	PF10_0158	PF10_0158_v7.1_P2/2	conserved Plasmodium protein, unknown function	PF3D7_1016200	PF10_0158				Pf3D7_10_v3:646,054..647,736(+)	Rab3 GTPase-activating protein non-catalytic subunit, putative	1.40882e-06	1.40652e-12	0.00535042	0.0223002	1.40257	0.00384216	1.55024	0.000915488	1.67064	0.000111202	1.85381	5.30372e-06	2.1424	0.00066957	1.69723	0.0351317	1.39299	9.69396	4.83299	117.597	8.37551	4.06227	1.44662	2.42156	1
567	PF10_0159	PF10_0159_v7.1_P2/3	glycophorin binding protein	PF3D7_1016300	PF10_0159				Pf3D7_10_v3:650,898..653,567(-)	GBP130 protein	4.64036e-08	1.14236e-05	3.34013e-08	0.000267584	-2.28428	0.00727037	-1.78623	0.0529812	-1.50274	0.0182841	-1.65472	0.430948	-1.17576	0.945243	-1.01415	0.598464	-1.12237	13.1517	13.5552	26.3844	3.88484	16.3114	12.0084	5.00616	1
1742	PF10_0160	PF10_0160_v7.1_P2/2	serine/threonine protein kinase, FIKK family	PF3D7_1016400	PF10_0160				Pf3D7_10_v3:656,709..659,027(-)	serine/threonine protein kinase, FIKK family	6.52542e-12	0.351141	3.8186e-09	0.00600747	-1.66597	0.0202257	-1.52856	0.0199932	-1.52987	0.701361	-1.06968	0.338603	1.18417	0.966156	1.00747	0.0132324	-1.62699	26.0876	19.7641	0.893721	0.0967267	19.5636	10.5868	3.67979	1
3710	PF10_0161a	PF10_0161A_v7.1_P1/1	Plasmodium exported protein, unknown function	?	?	?	?	?	?	?	1.82966e-08	0.93581	4.99086e-08	0.0157773	-1.81311	0.441779	-1.19991	0.0464448	1.62245	0.159432	-1.40051	0.0677662	-1.55548	0.888916	-1.0335	0.994081	1.00187	14.218	19.4709	0.00658285	0.00128784	15.7527	15.409	6.65162	1
1660	PF10_0162	PF10_0162_v7.1_P2/3	Plasmodium exported protein (PHISTc), unknown function	PF3D7_1016700	PF10_0162				Pf3D7_10_v3:669,202..671,853(-)	Plasmodium exported protein (PHISTc), unknown function	3.85688e-09	0.0308616	1.41893e-08	0.0997774	-1.92722	0.792274	-1.1084	0.216094	-1.63022	0.52446	1.2832	0.580812	-1.24132	0.000119618	-5.38852	0.00196161	-4.01769	16.135	60.5856	5.07351	2.72151	17.5465	47.0611	18.2381	1
3749	PF10_0163	PF10_0163_v7.1_P1/1	Plasmodium exported protein (PHISTc), unknown function	PF3D7_1016800	PF10_0163				Pf3D7_10_v3:675,293..676,417(-)	Plasmodium exported protein (PHISTc), unknown function	0.263449	0.0546159	0.362929	0.118172	-4.36222	0.166789	-3.66272	0.496008	1.88201	0.223416	-3.12522	0.121713	-4.29931	0.822257	-1.23123	0.0607938	-6.71948	1.33731	28.2004	3.96236	11.9366	1.13092	17.0344	102.425	1
2301	PF10_0164	PF10_0164_v7.1_P1/1	early transcribed membrane protein 10.3	PF3D7_1016900	PF10_0164				Pf3D7_10_v3:682,182..682,508(-)	early transcribed membrane protein 10.3	0.305945	0.0198146	0.448359	0.0484026	-3.79953	0.0497496	-3.76782	0.866217	1.11702	0.426608	-1.6898	0.108998	-2.92436	0.870145	-1.11337	0.0303422	-4.83156	1.24583	13.2265	5.9786	9.06745	0.972676	7.37605	51.5661	1
28	PF10_0165	PF10_0165_v7.1_P4/4	DNA polymerase delta catalytic subunit	PF3D7_1017000	PF10_0165				Pf3D7_10_v3:685,578..688,862(+)	DNA polymerase delta catalytic subunit	1.15573e-11	0.0127084	2.37241e-09	0.781128	-1.08202	0.490217	-1.21693	0.0076406	-2.22169	0.257274	-1.38308	0.709915	1.11136	0.158257	1.50092	0.694258	1.1267	25.0375	49.5448	6.9212	1.95655	20.3339	28.7409	9.61144	1
464	PF10_0166	PF10_0166_v7.1_P1/1	conserved Plasmodium protein, unknown function	PF3D7_1017100	PF10_0166				Pf3D7_10_v3:689,888..690,820(-)	rhoptry neck protein 12	1.99193e-06	0.000197621	9.25742e-07	0.633798	-1.27409	0.95281	-1.0305	0.591475	1.31393	0.0564691	-2.70486	0.00105288	-6.08025	0.0497861	-2.78727	0.0732492	-2.70675	9.37913	59.4817	17.4002	15.7644	12.0574	54.6195	30.8036	1
1450	PF10_0167	PF10_0167_v7.1_P1/2	enoyl-CoA hydratase-related protein, putative	PF3D7_1017200	PF10_0167				Pf3D7_10_v3:692,426..694,218(+)	enoyl-CoA hydratase-related protein, putative	0.00878052	0.63287	0.00891814	0.446449	1.69908	0.501761	1.59558	0.0393977	-4.36846	0.9575	1.03764	0.636653	1.38822	0.686949	1.32275	0.785313	1.22384	3.29465	38.9701	0.232357	0.392627	3.69239	31.1962	57.4517	1
2543	PF10_0169	PF10_0169_v7.1_P1/1	phosphomannomutase, putative	PF3D7_1017400	PF10_0169				Pf3D7_10_v3:697,970..699,823(-)	phosphomannomutase, putative	4.52405e-05	9.30773e-05	3.87369e-09	8.57969e-05	-2.59777	0.000221445	-2.42295	0.109231	-1.4223	0.286014	1.26132	0.289058	1.25945	0.00325044	-1.97031	9.20525e-06	-3.29573	6.79869	7.7894	19.6209	3.21144	19.5408	15.9916	5.56493	1
3639	PF10_0170	PF10_0170_v7.1_P1/1	conserved Plasmodium protein, unknown function	PF3D7_1017500	PF10_0170				Pf3D7_10_v3:701,746..702,422(+)	myosin essential light chain ELC	4.21048e-13	0.512075	3.09679e-15	0.235541	1.56301	0.00219916	3.40483	0.0164503	2.54309	0.0490778	2.12725	2.71661e-05	-6.00322	7.82616e-05	-5.25956	0.0681076	-2.10639	31.6411	108.095	0.438995	0.214248	54.257	132.399	16.5935	1
2260	PF10_0171	PF10_0171_v7.1_P3/3	conserved Plasmodium protein, unknown function	PF3D7_1017600	PF10_0171				Pf3D7_10_v3:705,537..708,452(+)	conserved Plasmodium protein, unknown function	7.59789e-08	3.39262e-09	0.0816337	0.111067	1.31478	0.0173465	1.51959	0.035716	1.44173	0.25912	1.21165	0.0255846	1.47786	0.000499131	1.90357	0.00485061	1.71417	12.6095	8.81269	62.3536	6.22549	2.16161	1.07909	3.39462	1
2387	PF10_0173	PF10_0173_v7.1_P1/4	conserved Plasmodium protein, unknown function	PF3D7_1017800	PF10_0173				Pf3D7_10_v3:711,016..714,658(-)	conserved Plasmodium protein, unknown function	4.82715e-09	1.23287e-06	1.18627e-08	0.520314	1.08037	0.11381	1.21307	0.068476	1.25097	0.0498352	1.27384	0.000232259	1.63195	0.0020929	1.48651	0.00506794	1.46412	15.8479	5.60594	34.5744	1.74716	17.8127	4.50068	1.71813	1
2236	PF10_0174	PF10_0174_v7.1_P2/2	26s proteasome regulatory subunit p55, putative	PF3D7_1017900	PF10_0174				Pf3D7_10_v3:715,878..717,437(+)	26S proteasome regulatory subunit p55, putative	0.000268051	0.503412	1.11941e-05	0.544672	-1.07367	0.71533	-1.04365	0.472595	-1.08804	0.416487	-1.10027	0.606107	1.06233	0.010213	1.37159	0.000482552	1.6151	5.51246	1.85807	0.457409	0.0220253	9.35666	2.25273	1.63718	1
893	PF10_0175	PF10_0175_v7.1_P1/2	tRNA pseudouridine synthase, putative	PF3D7_1018000	PF10_0175				Pf3D7_10_v3:718,454..720,136(+)	tRNA pseudouridine synthase, putative	2.97982e-10	0.226305	2.62461e-07	0.172284	1.20636	0.136074	1.22805	0.631488	-1.06729	0.780169	-1.03858	0.0444168	1.32428	0.00479544	1.50095	0.165119	1.22637	19.6901	8.90384	1.51847	0.0980928	13.5765	4.3852	2.19639	1
1518	PF10_0177a	PF10_0177A_v7.1_P7/7	serine/threonine protein phosphatase, putative	PF3D7_1018200	PF10_0177a				Pf3D7_10_v3:721,734..728,331(-)	serine/threonine protein phosphatase 8, putative	1.7241e-09	0.0184396	2.84032e-10	0.288914	1.64312	0.148975	1.97517	0.0235847	2.98202	0.00169265	-4.8141	0.000703237	-5.57251	0.399689	-1.48162	0.645139	-1.2573	17.1964	91.2577	6.12887	4.64637	24.0418	91.1318	25.7758	1
2445	PF10_0177b	PF10_0177B_v7.1_P1/3	conserved Plasmodium protein, unknown function	PF3D7_1018300	PF10_0177b				Pf3D7_10_v3:729,809..732,856(-)	conserved Plasmodium protein, unknown function	2.2875e-09	0.00659045	1.99343e-09	0.671291	1.06923	0.0383373	1.4007	0.0249668	1.4431	0.312988	1.17369	0.0132508	1.50486	0.0128474	-1.50786	0.0101816	-1.576	16.818	10.2714	8.37734	0.730912	20.621	8.99578	2.96645	1
919	PF10_0178	PF10_0178_v7.1_P1/1	conserved Plasmodium protein, unknown function	PF3D7_1018400	PF10_0178				Pf3D7_10_v3:734,722..735,738(+)	conserved Plasmodium protein, unknown function	0.00131409	0.00967758	0.00555098	0.740396	1.06819	0.729271	1.07134	0.699732	1.07983	0.712585	1.07611	0.00189228	1.94479	0.61337	1.10595	0.860737	1.03802	4.45795	4.34176	7.51641	1.04579	4.03536	2.80728	4.73055	1
842	PF10_0179	PF10_0179_v7.1_P3/6	conserved Plasmodium protein, unknown function	PF3D7_1018600	PF10_0179				Pf3D7_10_v3:737,692..743,406(-)	tRNA wybutosine-synthesizing protein, putative	2.36374e-08	0.228711	1.3658e-07	0.0106082	-1.36392	0.357776	1.11292	0.454894	-1.09062	0.304596	1.12707	0.04665	1.26736	0.125921	-1.19728	0.0332124	-1.313	13.9188	4.57819	1.50249	0.0706003	14.4081	3.38509	1.59762	1
3791	PF10_0179a	PF10_0179A_v7.1_P1/1	PHF5-like protein, putative	?	?	?	?	?	?	?	1.18151e-09	0.00389913	1.59061e-08	0.00112218	-1.61401	0.541013	-1.08661	0.243367	1.17315	0.348894	1.13628	0.000377856	1.70024	0.303349	1.15093	0.896673	-1.01899	17.712	8.00355	9.59397	0.619321	17.3781	5.60907	2.19481	1
1245	PF10_0180	PF10_0180_v7.1_P1/2	conserved Plasmodium protein, unknown function	PF3D7_1018700	PF10_0180				Pf3D7_10_v3:747,028..748,887(+)	conserved Plasmodium protein, unknown function	5.12663e-08	0.0316397	5.36366e-07	0.00267294	-1.48918	0.202954	-1.17299	0.550121	-1.07701	0.286413	1.14238	0.000328701	1.63393	0.942508	1.00897	0.402878	-1.11773	13.0409	4.92028	5.02372	0.270776	12.7017	3.42308	1.83258	1
1677	PF10_0182	PF10_0182_v7.1_P1/3	conserved Plasmodium protein, unknown function	PF3D7_1018900	PF10_0182				Pf3D7_10_v3:752,760..754,910(-)	conserved Plasmodium protein, unknown function	0.338048	0.436461	0.0203959	0.496137	-1.10983	0.448264	-1.12323	0.817853	1.03578	0.466632	-1.11798	0.0244877	1.42843	0.417145	1.13249	0.142515	-1.2752	1.18357	0.678256	0.620113	0.0507659	3.10902	1.27261	2.78343	1
1108	PF10_0183	PF10_0183_v7.1_P5/7	eukaryotic translation initiation factor subunit eIF2A, putative	PF3D7_1019000	PF10_0183				Pf3D7_10_v3:757,795..765,158(+)	eukaryotic translation initiation factor subunit eIF2A, putative	1.12795e-05	9.83147e-12	0.00103541	4.60777e-05	-1.58455	8.83659e-05	-1.55042	0.000492303	-1.4622	0.00288346	-1.37257	1.33031e-06	-1.78122	1.83168e-05	-1.6338	3.40985e-06	-1.79325	7.89168	1.9165	101.343	3.51587	5.31104	0.921278	1.17956	1
2414	PF10_0184	PF10_0184_v7.1_P1/6	conserved Plasmodium protein, unknown function	PF3D7_1019100	PF10_0184				Pf3D7_10_v3:766,168..771,954(-)	conserved Plasmodium protein, unknown function	1.60235e-11	0.0027043	1.47943e-11	0.00406368	3.59649	0.415035	1.40879	0.219734	1.68086	0.000759179	-4.64868	6.45423e-05	-6.62939	0.290794	-1.56159	0.976823	-1.01308	24.4528	105.363	10.4697	6.44457	30.0324	92.4319	20.9286	1
3067	PF10_0186	PF10_0186_v7.1_P1/5	conserved Plasmodium protein, unknown function	PF3D7_1019300	PF10_0186				Pf3D7_10_v3:774,929..780,487(-)	zinc finger protein, putative	3.89265e-09	0.568967	7.13861e-08	0.00776581	2.25005	0.0326395	1.89344	0.0796072	1.67851	0.0562038	-1.76224	0.377806	-1.2919	0.153501	1.51953	0.156104	1.55954	16.1231	33.0771	0.330814	0.0969535	15.2657	22.37	9.96458	1
1018	PF10_0187	PF10_0187_v7.1_P1/1	60S ribosomal protein L30e, putative	PF3D7_1019400	PF10_0187				Pf3D7_10_v3:786,503..787,008(+)	60S ribosomal protein L30e, putative	2.53049e-06	0.000511407	0.00105664	0.627006	-1.14601	0.752167	1.09251	0.670127	-1.12684	0.00323382	2.41227	0.225273	1.40952	0.126815	1.54493	0.35701	1.31973	9.16516	17.6812	14.7432	4.06317	5.295	7.29642	9.37028	1
1840	PF10_0188	PF10_0188_v7.1_P2/4	conserved Plasmodium membrane protein, unknown function	PF3D7_1019500	PF10_0188				Pf3D7_10_v3:787,745..795,220(-)	conserved Plasmodium membrane protein, unknown function	2.21837e-13	0.252148	1.9581e-12	0.0019776	2.28086	7.29564e-05	3.03427	0.512923	-1.17662	0.0514024	-1.64328	0.444135	-1.20979	0.673239	-1.11031	0.867388	1.04524	33.0733	49.9818	1.35711	0.292988	34.7723	37.5353	7.34033	1
510	PF10_0189	PF10_0189_v7.1_P1/4	conserved Plasmodium protein, unknown function	PF3D7_1019600	PF10_0189				Pf3D7_10_v3:796,291..799,923(+)	conserved Plasmodium protein, unknown function	2.24587e-09	0.144189	1.25242e-09	0.0690299	1.93661	0.0265934	2.26139	0.0925056	1.83923	0.00739798	-2.72588	0.0109701	-2.5785	0.665916	-1.16569	0.678291	1.17052	16.8424	52.1231	2.23445	0.987866	21.402	47.31	15.0317	1
1257	PF10_0190	PF10_0190_v7.1_P1/4	conserved Plasmodium protein, unknown function	PF3D7_1019700	PF10_0190				Pf3D7_10_v3:800,278..803,502(-)	conserved Plasmodium protein, unknown function	7.51503e-12	0.00280256	3.96575e-10	0.0557886	1.60918	0.127376	1.45555	0.495212	1.18012	0.00522474	-2.0483	0.00629156	-2.013	0.671877	-1.10809	0.695832	-1.10655	25.825	37.2175	10.3832	2.13768	23.4279	24.1164	6.99984	1
1177	PF10_0191	PF10_0191_v7.1_P4/4	tRNA methyltransferase, putative	PF3D7_1019800	PF10_0191				Pf3D7_10_v3:804,328..807,582(-)	tRNA methyltransferase, putative	1.27443e-10	0.0362684	1.25911e-11	0.000652685	2.20678	0.0698792	1.48396	0.000632154	-2.21207	0.143874	-1.37094	0.255999	-1.2759	0.895181	-1.02839	0.0479351	1.58823	20.9914	23.3175	4.75282	0.754214	30.3901	24.1127	5.39538	1
1857	PF10_0193	PF10_0193_v7.1_P1/1	microtubule-associated protein 1 light chain 3, putative	PF3D7_1019900	PF10_0193				Pf3D7_10_v3:808,618..808,992(-)	autophagy-related protein 8	3.45966e-11	0.377801	5.32683e-12	0.00133744	2.3879	0.000727583	2.52185	0.37519	-1.25077	0.741518	1.08633	0.0748557	-1.5803	0.0153523	-1.88821	0.755651	1.0871	23.1188	35.8043	0.798578	0.176681	32.3565	35.7934	7.5223	1
3782	PF10_0194	PF10_0194_v7.1_P1/1	large subunit rRNA processing RRM protein, putative	PF3D7_1020000	PF10_0194				Pf3D7_10_v3:811,106..813,484(-)	RNA-binding protein 34, putative	0.00426503	0.001782	0.069025	0.0627995	-1.56604	0.38239	-1.22918	8.95251e-05	-2.81777	0.891768	1.03248	0.582394	-1.13821	0.110953	-1.46462	0.00070279	-2.53209	3.72612	5.05996	11.4954	2.23007	2.27507	2.20676	6.59586	1
2891	PF10_0197	PF10_0197_v7.1_P2/2	methyltransferase, putative	PF3D7_1020400	PF10_0197				Pf3D7_10_v3:822,602..824,593(-)	rRNA (cytosine-C(5))-methyltransferase, putative	1.10427e-13	4.74531e-09	1.02626e-08	0.127992	-1.28474	0.442563	1.1329	0.0661424	1.35649	0.00790929	1.57344	5.35629e-05	2.09913	0.000850494	1.79969	0.0399976	-1.44291	34.6948	22.3504	60.4979	5.56755	18.0302	8.29646	3.12898	1
2792	PF10_0198	PF10_0198_v7.1_P1/2	conserved Plasmodium protein, unknown function	PF3D7_1020500	PF10_0198				Pf3D7_10_v3:825,451..826,971(+)	ribosomal silencing factor RsfS, putative	4.22696e-07	0.0233334	1.79311e-07	0.000205915	-1.98946	0.88483	-1.02444	0.716951	1.06236	0.768208	1.05039	0.00315308	1.69188	0.000630394	1.86467	0.138065	-1.3082	10.8375	7.41085	5.64052	0.551011	14.0577	6.86636	3.32139	1
2023	PF10_0200	PF10_0200_v7.1_P4/4	ribosomal processing ATPase, putative	PF3D7_1020700	PF10_0200				Pf3D7_10_v3:835,292..839,700(+)	N-acetyltransferase, GNAT family, putative	1.48504e-15	3.65586e-06	4.18543e-09	0.0488249	-1.36781	0.536576	1.10043	0.304418	1.17332	0.121416	1.2757	0.00258815	1.64622	0.105342	1.2905	0.00248279	-1.70821	46.3253	27.1843	30.438	2.55163	19.4176	8.13891	2.85023	1
2124	PF10_0203	PF10_0203_v7.1_P1/1	ADP-ribosylation factor	PF3D7_1020900	PF10_0203				Pf3D7_10_v3:845,086..846,192(-)	ADP-ribosylation factor	0.000198458	1.35441e-10	0.174901	0.371874	-1.17555	0.000211327	-2.09887	0.00141081	-1.86128	0.0104705	-1.62307	0.000160604	-2.13467	0.00476405	-1.71578	0.113774	-1.36363	5.72146	4.56484	82.172	9.36579	1.64452	0.937196	3.87525	1
356	PF10_0205	PF10_0205_v7.1_P3/5	conserved Plasmodium protein, unknown function	PF3D7_1021100	PF10_0205				Pf3D7_10_v3:851,000..856,285(-)	conserved Plasmodium protein, unknown function	2.61922e-11	2.29879e-10	1.2453e-06	0.181054	-1.13259	0.077427	1.18061	1.26445e-07	1.83302	0.110339	1.16124	0.146001	1.1453	0.00340348	1.3326	0.424595	1.08197	23.5942	4.89933	78.6524	2.33316	11.7157	1.73769	1.00858	1
2601	PF10_0206	PF10_0206_v7.1_P2/2	conserved Plasmodium protein, unknown function	PF3D7_1021200	PF10_0206				Pf3D7_10_v3:857,673..859,742(-)	conserved Plasmodium protein, unknown function	0.5178	0.002439	0.648823	0.0754211	-3.79365	0.183142	-2.68558	0.624947	-1.43141	0.0538967	-4.27051	0.0412113	-4.67701	0.806739	-1.19631	0.0302606	-5.79735	0.899943	11.8803	10.7208	20.2182	0.670044	6.3181	64.1198	1
2990	PF10_0207	PF10_0207_v7.1_P2/2	conserved Plasmodium membrane protein, unknown function	PF3D7_1021300	PF10_0207				Pf3D7_10_v3:860,960..862,449(-)	apicoplast integral membrane protein, putative	4.99311e-08	0.38626	1.19658e-05	0.273604	1.58848	0.413876	1.41061	0.0602521	2.24411	0.185305	-1.75462	0.752888	1.1411	0.0427615	2.39981	0.313763	1.57553	13.0702	56.4588	0.77038	0.475398	9.28951	28.6626	20.9813	1
2609	PF10_0208	PF10_0208_v7.1_P2/2	endomembrane protein 70, putative	PF3D7_1021400	PF10_0208				Pf3D7_10_v3:863,907..866,742(+)	endomembrane protein 70, putative	0.00919669	1.06442e-05	6.36272e-05	0.495319	1.11465	0.337622	1.16551	8.97808e-05	2.01265	0.0501204	1.37691	0.03903	1.40222	0.0501843	1.37678	0.388172	1.15853	3.26737	2.02359	26.6277	2.35592	7.68546	3.3999	3.00819	1
2648	PF10_0209	PF10_0209_v7.1_P1/2	RNA helicase, putative	PF3D7_1021500	PF10_0209				Pf3D7_10_v3:867,635..869,677(-)	ATP-dependent RNA helicase ROK1, putative	1.26918e-07	0.000217987	0.000975269	0.371581	-1.20207	0.381562	1.19744	0.18115	1.31981	0.420866	1.18011	0.230315	1.2818	0.0247951	1.61183	0.53911	1.14432	12.0614	12.4452	17.1186	2.52334	5.35844	3.94927	5.01172	1
2567	PF10_0210	PF10_0210_v7.1_P2/2	deoxyribose-phosphate aldolase, putative	PF3D7_1021600	PF10_0210				Pf3D7_10_v3:871,095..871,886(+)	deoxyribose-phosphate aldolase, putative	6.90325e-12	0.171484	1.47774e-12	0.000302045	-1.63132	0.0158131	-1.36196	0.418484	-1.10473	0.889029	1.01724	0.0019803	1.50319	8.80217e-05	1.71771	0.0148617	1.39601	25.9827	9.59738	1.95144	0.102973	35.4777	9.36044	1.79411	1
504	PF10_0211	PF10_0211_v7.1_P18/20	conserved Plasmodium membrane protein, unknown function	PF3D7_1021700	PF10_0211				Pf3D7_10_v3:873,208..894,869(-)	conserved Plasmodium membrane protein, unknown function	7.14716e-10	9.38621e-05	1.59627e-10	0.01062	1.59743	0.137432	-1.3015	0.182398	-1.26591	0.735899	1.06068	0.035713	-1.46059	0.000310347	-2.0046	0.726446	-1.0675	18.4155	13.8009	19.5955	2.09789	25.1303	13.4522	3.64004	1
1743	PF10_0212a	PF10_0212A_v7.1_P2/6	conserved Plasmodium protein, unknown function	PF3D7_1021800	PF10_0212a				Pf3D7_10_v3:896,865..903,608(-)	schizont egress antigen-1	4.44979e-12	0.00233616	6.46036e-12	0.0219792	1.85667	0.00583762	2.13453	0.602446	-1.14513	0.0139068	-1.95133	0.00165384	-2.4132	0.129397	-1.4927	0.953114	-1.01645	26.8109	44.4863	10.8262	2.56621	31.9068	37.8155	8.05927	1
822	PF10_0213	PF10_0213_v7.1_P1/7	conserved Plasmodium protein (10b antigen), unknown function	PF3D7_1021900	PF10_0213				Pf3D7_10_v3:905,473..912,345(-)	PHAX domain-containing protein, putative	9.62998e-15	3.15954e-07	2.71851e-12	0.114504	1.37689	0.912876	-1.022	4.34232e-05	-2.52349	0.0168621	-1.64255	0.0286689	-1.57015	0.60874	-1.1074	0.905359	-1.02561	40.9166	39.8399	40.1514	5.58498	33.9646	23.622	4.72933	1
645	PF10_0214	PF10_0214_v7.1_P2/5	RNA binding protein, putative	PF3D7_1022000	PF10_0214				Pf3D7_10_v3:919,772..924,213(+)	RNA-binding protein, putative	3.62978e-09	0.0168028	1.09124e-09	0.000261162	-1.6809	0.14629	-1.20863	0.992063	-1.00128	0.962004	1.00614	0.0266562	1.34353	3.56781e-05	1.83297	0.744734	-1.04574	16.2133	6.57757	6.32444	0.366537	21.6376	6.2701	1.97049	1
1383	PF10_0215	PF10_0215_v7.1_P2/2	conserved Plasmodium membrane protein, unknown function	PF3D7_1022200	PF10_0215				Pf3D7_10_v3:926,831..929,020(-)	conserved Plasmodium membrane protein, unknown function	4.37263e-10	0.255949	1.93218e-08	0.174825	1.511	0.0178369	-2.09923	0.673007	1.13519	0.418243	1.27644	0.0534399	1.8148	0.00305854	2.58569	0.00268065	2.80487	19.1234	42.3747	1.33514	0.422641	17.094	27.0556	10.7627	1
2573	PF10_0215a	PF10_0215A_v7.1_P1/1	conserved Plasmodium protein, unknown function	?	?	?	?	?	?	?	3.76905e-14	0.000860593	6.33771e-10	0.00122352	-2.15711	0.888067	1.03139	0.21446	1.31742	0.127214	1.40593	0.00470381	1.93346	0.853614	-1.04135	0.00104964	-2.30427	37.327	44.2725	13.3564	2.2631	22.5855	19.1343	5.76091	1
3044	PF10_0216	PF10_0216_v7.1_P1/1	zinc transporter, putative	PF3D7_1022300	PF10_0216				Pf3D7_10_v3:932,697..934,381(+)	ZIP domain-containing protein, putative	1.03664e-06	0.352676	5.03912e-07	0.366105	1.57659	0.114856	2.23504	0.0790716	-2.4591	0.66965	-1.23849	0.128707	2.16817	0.147719	2.08807	0.03114	3.30238	9.978	61.5589	0.88797	0.782614	12.7767	56.3039	29.966	1
3220	PF10_0217	PF10_0217_v7.1_P1/2	pre-mRNA splicing factor, putative	PF3D7_1022400	PF10_0217				Pf3D7_10_v3:939,938..942,234(-)	serine/arginine-rich splicing factor 4	2.19891e-05	0.143144	0.0014257	0.0121944	-1.76653	0.149612	-1.37277	0.367854	-1.21669	0.791978	-1.05879	0.810918	-1.05318	0.914995	-1.02338	0.00228324	-2.13377	7.35604	8.48541	2.24651	0.370202	5.06006	4.16924	5.60286	1
1393	PF10_0218	PF10_0218_v7.1_P2/2	citrate synthase, mitochondrial precursor, putative	PF3D7_1022500	PF10_0218				Pf3D7_10_v3:944,398..946,089(-)	citrate synthase, mitochondrial, putative	1.52533e-10	0.120737	2.32459e-11	0.0282241	1.81132	7.55253e-05	3.21083	0.161652	1.44892	0.37194	-1.2643	0.903156	1.03228	0.364418	-1.26906	0.790974	1.07683	20.7107	34.7507	2.5331	0.607189	29.0479	34.8141	8.14986	1
391	PF10_0219	PF10_0219_v7.1_P2/3	kelch protein, putative	PF3D7_1022600	PF10_0219				Pf3D7_10_v3:948,477..951,152(+)	kelch protein K10	1.51754e-15	1.39754e-07	3.84193e-11	0.353211	-1.15754	0.04798	1.37558	0.0421577	1.38845	0.0324829	1.41418	4.39537e-05	2.07102	0.952781	1.00932	0.00516935	-1.64324	46.2592	27.9125	43.717	3.76836	27.9833	12.0607	2.93076	1
3245	PF10_0220	PF10_0220_v7.1_P1/1	phospholipid scramblase 1, putative	PF3D7_1022700	PF10_0220				Pf3D7_10_v3:951,752..952,579(-)	phospholipid scramblase, putative	5.00592e-14	0.0449461	3.09332e-14	9.68715e-06	5.98959	8.42697e-06	6.08654	0.00200429	3.17099	0.870772	-1.05814	0.0136316	-2.4525	0.558678	-1.22585	0.0350643	2.24606	36.6159	108.717	4.33445	1.8385	46.4444	98.4992	14.4214	1
2326	PF10_0221	PF10_0221_v7.1_P1/3	GcpE protein	PF3D7_1022800	PF10_0221				Pf3D7_10_v3:955,883..958,357(+)	4-hydroxy-3-methylbut-2-en-1-yl diphosphate synthase (ferredoxin), putative	5.92199e-14	0.59659	8.45398e-13	0.0231991	1.79502	0.0178708	1.84492	0.00709993	-2.02383	0.0732755	-1.57586	0.321797	1.28069	0.0570538	1.62368	0.0534442	1.69272	36.2003	54.7455	0.285509	0.0616818	36.9122	39.8729	7.34542	1
2837	PF10_0222	PF10_0222_v7.1_P1/1	PfMNL-3 mitoNEET-like iron-sulfur protein, putative	PF3D7_1022900	PF10_0222				Pf3D7_10_v3:958,939..959,896(-)	CDGSH iron-sulfur domain-containing protein, putative	5.75158e-11	0.333306	6.47021e-12	0.000469883	3.28416	2.65045e-06	5.63151	0.0616233	-1.81114	0.298393	-1.38337	0.888166	1.0445	0.612414	1.17016	0.0379307	2.03303	22.2702	52.5268	0.963232	0.324557	31.9033	53.7483	11.4562	1
1132	PF10_0223	PF10_0223_v7.1_P1/2	conserved Plasmodium membrane protein, unknown function	PF3D7_1023000	PF10_0223				Pf3D7_10_v3:961,066..962,307(-)	conserved Plasmodium membrane protein, unknown function	3.40981e-14	0.385721	1.85539e-15	0.0459554	1.44038	0.000389139	2.00024	0.027609	1.49994	0.80693	1.04434	0.00308101	-1.75299	1.65076e-05	-2.41833	0.781477	-1.05406	37.5808	29.1234	0.77215	0.0854827	56.1444	31.078	3.76405	1
2228	PF10_0225	PF10_0225_v7.1_P1/1	orotidine monophosphate decarboxylase	PF3D7_1023200	PF10_0225				Pf3D7_10_v3:982,231..983,202(+)	orotidine 5'-phosphate decarboxylase	1.99886e-13	0.109878	2.95168e-11	1.23939e-05	-2.27253	0.0559906	-1.37426	0.677193	-1.06979	0.835187	1.03426	0.014116	1.51547	0.011821	1.53334	0.00483589	-1.67838	33.3113	21.4769	2.69507	0.248229	28.5379	13.1424	3.13157	1
534	PF10_0226	PF10_0226_v7.1_P1/1	conserved Plasmodium protein, unknown function	PF3D7_1023300	PF10_0226				Pf3D7_10_v3:984,228..985,330(-)	conserved Plasmodium protein, unknown function	1.07669e-08	0.879133	3.11601e-11	0.000106139	4.02633	0.0312188	2.04191	0.000514676	-3.3838	0.164409	-1.57053	0.734685	1.11465	0.0741581	1.79543	0.00269026	3.00259	14.8516	37.4306	0.0234753	0.00845217	28.4233	51.1682	12.2415	1
3794	PF10_0227	PF10_0227_v7.1_P1/1	HORMA domain protein, putative	PF3D7_1023400	PF10_0227				Pf3D7_10_v3:985,350..986,988(+)	HORMA domain protein, putative	2.95254e-13	0.112141	3.82921e-11	9.85025e-07	3.52066	0.00180258	2.04565	0.253807	-1.27806	0.878871	-1.03299	0.536946	1.14092	0.0249128	1.64209	0.0010204	2.25228	32.4276	36.1812	2.65985	0.423962	27.9903	22.3073	5.41937	1
1203	PF10_0229	PF10_0229_v7.1_P2/2	conserved Plasmodium protein, unknown function	?	?	?	?	?	?	?	0.0124576	0.00937037	0.275104	0.155262	-2.38174	0.171131	-2.30432	0.995922	1.00308	0.15781	-2.36872	0.154546	-2.38544	0.97836	1.01645	0.0824774	-3.13338	3.08966	27.5105	7.58773	9.65165	1.33006	8.45923	43.2483	1
878	PF10_0232	PF10_0232_v7.1_P1/10	chromodomain-helicase-DNA-binding protein 1 homolog, putative	PF3D7_1023900	PF10_0232				Pf3D7_10_v3:997,475..1,007,461(-)	chromodomain-helicase-DNA-binding protein 1 homolog, putative	0.110606	0.0175212	0.00111827	0.370875	-1.19862	0.863718	1.03516	0.21987	-1.28365	0.691993	-1.08309	0.376695	-1.19596	0.0512265	-1.4974	0.000361868	-2.33034	1.84375	1.83798	6.23617	0.888095	5.25027	3.73847	4.84195	1
3534	PF10_0235	PF10_0235_v7.1_P1/1	RNA binding protein, putative	PF3D7_1024200	PF10_0235				Pf3D7_10_v3:1,021,292..1,021,774(-)	RNA-binding protein, putative	3.13434e-09	0.263456	1.10359e-06	0.181751	1.6829	0.860413	1.06999	0.137492	-1.78738	0.0394773	2.26523	0.125239	1.82241	0.0321731	2.34651	0.120279	1.91643	16.4038	59.7264	1.29295	0.672521	11.8542	30.8296	17.6849	1
439	PF10_0237	PF10_0237_v7.1_P2/2	conserved Plasmodium protein, unknown function	PF3D7_1024400	PF10_0237				Pf3D7_10_v3:1,023,205..1,024,869(-)	conserved Plasmodium protein, unknown function	0.000394276	0.0215322	0.000152153	0.619149	-1.27062	0.899857	1.0624	0.307784	1.63942	0.00626899	-4.01982	0.0148571	-3.40494	0.882713	1.07355	0.755489	-1.17378	5.24883	29.8829	5.80607	4.72221	6.9052	28.0808	27.653	1
2825	PF10_0238	PF10_0238_v7.1_P1/1	conserved Plasmodium protein, unknown function	PF3D7_1024500	PF10_0238				Pf3D7_10_v3:1,026,120..1,026,914(+)	conserved Plasmodium protein, unknown function	0.338982	0.327815	0.786789	0.0807974	-5.31267	0.685747	-1.46044	0.524973	1.815	0.158721	-3.80876	0.283312	-2.75021	0.600216	1.63388	0.219584	-3.45839	1.18183	25.4213	0.985677	3.02885	0.48252	7.41358	104.477	1
1332	PF10_0241	PF10_0241_v7.1_P2/2	conserved Plasmodium protein, unknown function	PF3D7_1024700	PF10_0241				Pf3D7_10_v3:1,030,044..1,031,534(+)	conserved Plasmodium protein, unknown function	3.67631e-11	0.000517933	2.4857e-10	0.082555	1.7223	0.696487	1.127	0.000483315	-3.23168	0.00931807	-2.31139	0.447196	-1.26329	0.560571	1.19558	0.738934	-1.11535	23.0161	53.0974	14.7088	4.84756	24.2904	40.0267	11.2053	1
2698	PF10_0242	PF10_0242_v7.1_P5/5	conserved Plasmodium protein, unknown function	PF3D7_1024800	PF10_0242				Pf3D7_10_v3:1,034,685..1,039,079(+)	exported protein 3	2.34875e-14	4.3807e-05	1.1343e-09	0.608408	-1.08681	0.36699	1.15857	0.0100602	1.5509	0.16058	1.25976	0.0515048	1.38391	0.73455	-1.05658	0.0247452	-1.49832	38.5387	24.9452	21.9507	2.02974	21.5712	9.97322	3.14391	1
745	PF10_0244	PF10_0244_v7.1_P3/3	formin 2, putative	PF3D7_1025000	PF10_0244				Pf3D7_10_v3:1,045,608..1,049,760(-)	EF-hand calcium-binding domain-containing protein, putative	4.52929e-15	0.289544	4.64265e-16	0.817858	1.02442	0.0304557	1.26458	0.000235231	1.53316	0.0199133	1.28909	0.00101529	-1.45311	0.000176729	-1.54898	0.898562	-1.01437	43.0278	11.6115	1.15758	0.0446263	61.5426	11.8628	1.31075	1
2197	PF10_0248	PF10_0248_v7.1_P4/4	conserved Plasmodium membrane protein, unknown function	PF3D7_1025400	PF10_0248				Pf3D7_10_v3:1,061,399..1,067,085(-)	conserved Plasmodium membrane protein, unknown function	1.21658e-13	0.640822	3.69191e-14	0.000164439	3.73244	0.000270077	3.53856	0.00128458	2.97938	0.140281	-1.59941	0.00209989	-2.81695	0.464818	-1.25851	0.234557	1.49537	34.4656	83.2694	0.22161	0.0764876	45.8865	79.1873	11.7349	1
782	PF10_0250	PF10_0250_v7.1_P2/17	conserved Plasmodium protein, unknown function	PF3D7_1025500	PF10_0250				Pf3D7_10_v3:1,067,652..1,086,992(-)	conserved Plasmodium protein, unknown function	0.316385	0.29685	0.0829758	0.481579	-1.5189	0.0262166	3.91699	0.218959	2.08691	0.341691	-1.762	0.841445	1.12571	0.296708	1.86364	0.748364	-1.22518	1.22502	10.5572	1.1225	1.38195	2.15058	13.2383	41.8586	1
3096	PF10_0252	PF10_0252_v7.1_P1/1	cytochrome c oxidase copper chaperone, putative	PF3D7_1025600	PF10_0252				Pf3D7_10_v3:1,088,214..1,088,417(+)	cytochrome c oxidase copper chaperone, putative	3.16905e-06	0.032026	6.06524e-05	0.163509	-2.1438	0.456042	-1.4974	0.0111301	-4.21099	0.349726	-1.66148	0.881649	1.08363	0.21536	1.96601	0.665884	-1.28318	8.96657	64.2093	4.9995	5.11446	7.72939	39.5356	34.7818	1
1199	PF10_0253	PF10_0253_v7.1_P1/1	conserved Plasmodium protein, unknown function	PF3D7_1025700	PF10_0253				Pf3D7_10_v3:1,088,931..1,089,494(+)	conserved Plasmodium protein, unknown function	4.27327e-14	0.280941	3.31833e-13	0.00295456	2.59676	0.0326355	1.94208	3.28035e-06	-5.23175	0.72533	-1.11134	0.259738	1.4071	0.121668	1.60484	0.0168694	2.22684	37.0109	82.0789	1.20041	0.380305	39.4221	62.4473	10.7717	1
3825	PF10_0253b	PF10_0253B_v7.1_P1/1	conserved Plasmodium protein, unknown function	PF3D7_1025800	PF10_0253b				Pf3D7_10_v3:1,089,997..1,090,538(-)	conserved Plasmodium protein, unknown function	3.56989e-13	0.117916	3.38642e-12	1.06241e-05	5.74747	0.000140073	4.27851	0.514838	-1.24986	0.172789	-1.603	0.616002	1.1871	0.195929	1.56362	0.0021434	3.33175	32.0048	91.7836	2.57352	1.05434	33.4324	68.4841	13.9293	1
1965	PF10_0254	PF10_0254_v7.1_P1/4	conserved Plasmodium protein, unknown function	PF3D7_1025900	PF10_0254				Pf3D7_10_v3:1,091,436..1,097,277(-)	conserved Plasmodium protein, unknown function	7.10172e-14	5.65248e-05	5.62869e-14	0.0142073	2.04377	0.0371135	1.8221	0.218324	1.41458	0.000112077	-3.34475	1.1958e-06	-5.09801	0.0990188	-1.59842	0.899295	1.03841	35.7557	68.293	21.1505	5.77105	44.5795	60.8189	9.27711	1
1188	PF10_0257	PF10_0257_v7.1_P2/2	conserved Plasmodium protein, unknown function	PF3D7_1026000	PF10_0257				Pf3D7_10_v3:1,098,455..1,099,882(-)	conserved Plasmodium protein, unknown function	2.01777e-11	0.106558	9.22634e-11	0.35894	-1.14853	0.0830998	-1.30457	0.737829	-1.05154	0.292475	1.1726	0.0751134	1.31442	0.0612509	1.33408	0.683624	-1.06762	24.047	13.3175	2.7483	0.217434	26.2004	10.3643	2.68994	1
2408	PF10_0259	PF10_0259_v7.1_P2/2	conserved Plasmodium protein, unknown function	PF3D7_1026200	PF10_0259				Pf3D7_10_v3:1,103,464..1,105,230(-)	conserved Plasmodium protein, unknown function	1.13742e-18	0.000942942	2.06298e-17	0.0536658	-1.57826	1.53249e-07	-4.49194	0.000387929	-2.45649	0.998548	-1.00042	0.00340577	2.05204	0.00179881	2.16673	0.11484	1.4843	73.5855	95.7824	13.1178	2.43925	75.4056	70.1082	6.32229	1
3337	PF10_0261a	PF10_0261A_v7.1_P1/1	conserved Plasmodium protein, unknown function	PF3D7_1026500	PF10_0261a				Pf3D7_10_v3:1,112,423..1,112,635(-)	conserved Plasmodium protein, unknown function	3.22645e-14	0.0154269	1.39579e-14	0.663544	1.14725	0.0177324	2.18166	0.103289	1.68879	0.0133974	-2.26297	0.000182979	-3.72103	0.00339117	-2.68084	0.706512	-1.13549	37.7216	92.309	6.50554	2.27426	49.0272	85.6967	11.886	1
2788	PF10_0262	PF10_0262_v7.1_P4/5	conserved Plasmodium protein, unknown function	PF3D7_1026600	PF10_0262				Pf3D7_10_v3:1,113,495..1,118,573(-)	conserved Plasmodium protein, unknown function	8.45517e-13	0.0004018	8.35229e-14	0.447478	-1.34342	0.104365	1.89838	0.418218	1.36998	0.710784	-1.15447	8.72708e-06	-7.44635	1.6717e-05	-6.84956	0.0698445	-2.15698	30.1427	111.092	15.402	8.10924	43.3854	114.213	17.9012	1
1969	PF10_0264	PF10_0264_v7.1_P1/1	40S ribosomal protein S2B, putative	PF3D7_1026800	PF10_0264				Pf3D7_10_v3:1,122,962..1,124,037(+)	40S ribosomal protein S2	0.382372	1.75105e-05	0.407101	0.00511593	-4.16132	0.0488507	-2.64667	0.100518	-2.23499	0.0124151	-3.51774	0.0257479	-3.03742	0.0573769	-2.55249	0.0125296	-3.82955	1.10499	6.26305	24.9358	20.1908	1.04582	4.23404	27.5302	1
650	PF10_0266	PF10_0266_v7.1_P1/3	small subunit rRNA processing stabilizing factor, putative	PF3D7_1027100	PF10_0266				Pf3D7_10_v3:1,133,838..1,136,156(-)	U3 small nucleolar ribonucleoprotein protein MPP10, putative	2.57097e-06	0.0680986	0.00403581	0.00154161	-2.82453	0.0766022	-1.7344	0.0830138	-1.71349	0.748694	-1.10228	0.604537	-1.17072	0.751798	-1.10091	0.000245511	-3.74493	9.15107	20.7799	3.55057	1.15179	4.26993	6.92571	11.0294	1
2037	PF10_0267	PF10_0267_v7.1_P2/2	mitochondrial ribosomal protein S22 precursor, putative	PF3D7_1027200	PF10_0267				Pf3D7_10_v3:1,138,002..1,139,564(+)	mitochondrial ribosomal protein S22 precursor, putative	5.96924e-11	0.00266378	5.78578e-08	0.00253419	-1.66961	0.393082	-1.1457	0.898286	-1.02046	0.719699	1.05855	0.00114961	1.74762	0.00918874	1.54397	0.00139288	-1.79514	22.2091	13.7142	10.5063	0.92681	15.5504	6.85889	2.99931	1
1724	PF10_0268	PF10_0268_v7.1_P2/2	merozoite capping protein 1	PF3D7_1027300	PF10_0268				Pf3D7_10_v3:1,140,589..1,142,602(-)	peroxiredoxin	1.14628e-11	5.56345e-14	3.91004e-14	0.000561438	-2.07651	0.0111287	-1.67429	0.33769	-1.20522	1.97396e-05	-2.58776	1.13838e-10	-5.76861	6.65941e-08	-3.734	1.62573e-06	-3.27924	25.0523	23.0538	149.075	19.5976	45.7067	30.0432	4.46967	1
3546	PF10_0269	PF10_0269_v7.1_P1/1	DNA-directed RNA polymerase II, putative	PF3D7_1027400	PF10_0269				Pf3D7_10_v3:1,145,823..1,146,795(-)	DNA-directed RNA polymerase II subunit RPB7, putative	2.35751e-06	0.895371	1.97144e-05	0.0040291	-2.06082	0.0668084	-1.55873	0.363057	-1.24123	0.167285	1.39205	0.374626	1.23477	0.923611	1.0229	0.0227369	-1.81836	9.22817	12.6638	0.017556	0.00344174	8.79453	8.62054	6.66547	1
2516	PF10_0270	PF10_0270_v7.1_P1/1	conserved Plasmodium protein, unknown function	PF3D7_1027500	PF10_0270				Pf3D7_10_v3:1,147,866..1,148,213(+)	conserved Plasmodium protein, unknown function	0.0251981	0.0216588	0.155025	0.00122882	-13.3817	0.012036	-7.03998	0.429838	1.79991	0.197485	-2.62983	0.232988	-2.44308	0.654021	1.39461	0.0393753	-5.39267	2.68331	36.2643	5.79395	11.1863	1.72696	16.671	65.6431	1
630	PF10_0271	PF10_0271_v7.1_P1/1	centrin-3	PF3D7_1027700	PF10_0271				Pf3D7_10_v3:1,150,663..1,151,853(-)	centrin-3	5.02516e-12	0.02244	4.09086e-08	0.0939102	1.65948	0.539139	-1.20002	0.634148	-1.15159	0.0383002	-1.88417	0.429792	-1.26473	0.526557	1.2069	0.043613	1.93194	26.5794	57.3456	5.72083	1.76326	16.0277	24.7001	10.4794	1
3722	PF10_0272	PF10_0272_v7.1_P2/2	60S ribosomal protein L3, putative	PF3D7_1027800	PF10_0272				Pf3D7_10_v3:1,153,271..1,154,431(-)	60S ribosomal protein L3	0.000738591	0.10239	0.00321835	0.00473271	-1.99368	0.0948288	-1.48021	0.057095	-1.56751	0.536592	-1.15314	0.786196	1.06439	0.875215	-1.03677	0.156204	-1.42447	4.8307	6.28486	2.81787	0.523731	4.43853	4.12474	6.31927	1
1237	PF10_0274	PF10_0274_v7.1_P2/2	methyltransferase, putative	PF3D7_1028000	PF10_0274				Pf3D7_10_v3:1,160,031..1,163,421(+)	methyltransferase, putative	1.35792e-14	0.669845	1.1231e-13	4.25969e-05	-2.27551	0.0283595	-1.49338	0.377528	-1.16953	0.0841486	1.36562	0.01593	1.55949	0.34026	1.18459	0.000251408	-2.14987	39.9853	30.6331	0.184976	0.0202445	42.5073	23.2609	3.7211	1
3401	PF10_0276	PF10_0276_v7.1_P1/1	zinc finger, C3HC4 type, putative	PF3D7_1028200	PF10_0276				Pf3D7_10_v3:1,166,046..1,166,870(-)	RING zinc finger protein, putative	3.95467e-14	0.555148	9.695e-13	8.54407e-07	5.75237	9.70751e-06	4.54049	0.0819005	-1.68634	0.0788317	-1.69577	0.745788	1.09995	0.19501	1.47007	0.0592585	1.83698	37.2057	78.9469	0.355171	0.107663	36.556	55.406	10.3064	1
516	PF10_0277	PF10_0277_v7.1_P1/1	nucleolar preribosomal assembly protein, putative	PF3D7_1028300	PF10_0277				Pf3D7_10_v3:1,168,010..1,168,957(-)	rRNA-processing protein EBP2, putative	2.77219e-15	3.33759e-09	7.00941e-08	0.47064	1.13649	0.0090978	1.62439	0.0254584	1.50659	0.11424	1.3288	0.000294741	2.02831	0.221454	1.24411	0.305231	-1.2155	44.453	34.1436	62.445	6.85185	15.2903	8.38874	3.73069	1
3351	PF10_0278	PF10_0278_v7.1_P1/2	nucleolar preribosomal assembly protein, putative	PF3D7_1028400	PF10_0278				Pf3D7_10_v3:1,169,940..1,171,391(+)	nucleolar preribosomal assembly protein, putative	2.83266e-11	0.0103949	3.85413e-06	0.00675779	-1.67776	0.658763	-1.0832	0.197497	-1.26592	0.169156	1.28661	0.0404957	1.46535	0.176199	1.2812	0.00517998	-1.77373	23.4596	18.8564	7.35896	0.844999	10.4655	6.00853	3.90408	1
1933	PF10_0279	PF10_0279_v7.1_P2/3	conserved Plasmodium protein, unknown function	PF3D7_1028500	PF10_0279				Pf3D7_10_v3:1,172,129..1,174,997(-)	partial CSTF domain-containing protein, putative	7.03315e-10	0.000428438	5.31783e-05	0.313915	-1.14788	0.0141201	1.41778	0.0716092	1.28519	0.0957986	1.26003	0.713386	1.05124	0.904523	-1.01644	0.0129495	-1.45987	18.4384	8.38343	15.2257	0.988957	7.85065	2.54963	2.20841	1
3030	PF10_0280	PF10_0280_v7.1_P1/1	conserved Plasmodium protein, unknown function	PF3D7_1028600	PF10_0280				Pf3D7_10_v3:1,176,461..1,177,849(-)	conserved Plasmodium protein, unknown function	0.014594	3.86188e-05	0.0100477	0.0337072	-3.50063	0.397913	-1.6237	0.293634	-1.82925	0.00910171	-4.78811	0.0113113	-4.55587	0.201827	-2.08938	0.0356099	-3.76032	2.99766	23.9985	22.3511	25.5625	3.60717	20.6272	38.8851	1
94	PF10_0281	PF10_0281_v7.1_P1/2	merozoite TRAP-like protein	PF3D7_1028700	PF10_0281				Pf3D7_10_v3:1,181,005..1,182,501(+)	merozoite TRAP-like protein	2.36194e-13	0.00719991	1.4091e-14	0.559854	1.20494	0.00430628	2.63429	0.228687	1.47417	0.0809242	-1.76741	0.000707642	-3.25174	0.000294489	-3.5854	0.0611023	-1.92623	32.9307	82.4423	8.17692	2.92443	48.9957	87.6151	12.1599	1
2938	PF10_0282	PF10_0282_v7.1_P1/1	conserved Plasmodium protein, unknown function	PF3D7_1028800	PF10_0282				Pf3D7_10_v3:1,183,487..1,183,995(-)	conserved Plasmodium protein, unknown function	7.59318e-14	0.225679	1.31407e-12	0.00842131	1.99463	0.00387207	2.14938	0.0355503	-1.71658	0.230577	-1.35164	0.683269	-1.10691	0.723363	-1.09209	0.361163	1.27666	35.5931	54.1602	1.52266	0.330994	35.7753	38.884	7.39088	1
2323	PF10_0285	PF10_0285_v7.1_P2/2	conserved Plasmodium protein, unknown function	PF3D7_1029200	PF10_0285				Pf3D7_10_v3:1,195,677..1,197,344(+)	WD repeat-containing protein, putative	6.76193e-13	8.35065e-05	4.43662e-09	0.000362333	-2.29064	0.585647	1.12207	0.0481398	1.5357	0.115305	1.40242	0.00869262	1.79091	0.0449124	1.54611	8.09747e-05	-2.72248	30.6163	33.4859	19.9496	3.11706	19.3252	15.0975	5.31239	1
1893	PF10_0286	PF10_0286_v7.1_P2/3	conserved Plasmodium protein, unknown function	PF3D7_1029300	PF10_0286				Pf3D7_10_v3:1,197,825..1,200,032(-)	conserved Plasmodium protein, unknown function	3.49165e-10	0.329221	1.04532e-10	0.848947	-1.03612	0.335308	1.19805	0.00333189	-1.79266	0.790244	-1.05082	0.00477078	1.7478	0.0265922	1.53507	0.45949	1.15937	19.4544	16.6089	0.979882	0.119509	25.9536	15.8268	4.14672	1
775	PF10_0287	PF10_0287_v7.1_P2/2	conserved Plasmodium protein, unknown function	PF3D7_1029400	PF10_0287				Pf3D7_10_v3:1,200,894..1,202,399(-)	LEM3/CDC50 family protein, putative	0.0041651	0.420777	0.118076	0.714867	1.04452	0.204096	1.16546	0.578413	1.0686	0.800072	1.03064	0.883488	-1.01761	0.294318	-1.13423	0.618681	1.06556	3.7405	1.30632	0.664133	0.0331343	1.91194	0.476945	1.6963	1
392	PF10_0289	PF10_0289_v7.1_P1/2	adenosine deaminase, putative	PF3D7_1029600	PF10_0289				Pf3D7_10_v3:1,206,302..1,207,405(+)	adenosine deaminase	2.79092e-05	1.16247e-09	0.00267641	0.000193941	-3.57555	0.000194381	-3.5747	0.000303434	-3.41029	0.00181037	-2.80732	0.00110412	-2.96601	0.0123849	-2.23793	3.30213e-05	-4.752	7.16944	16.6545	68.5298	22.742	4.57719	7.59483	11.2831	1
2202	PF10_0291	PF10_0291_v7.1_P1/2	RAP protein, putative	PF3D7_1029800	PF10_0291				Pf3D7_10_v3:1,211,658..1,212,971(-)	RAP protein, putative	7.49828e-13	0.2097	6.70473e-10	0.0109778	1.98157	0.422972	1.22894	0.293426	-1.31159	0.317943	1.29386	0.0977485	1.54155	0.0312261	1.77037	0.0362431	1.80846	30.3965	49.0482	1.6348	0.376847	22.4859	25.9168	7.83756	1
788	PF10_0292	PF10_0292_v7.1_P2/5	conserved Plasmodium protein, unknown function	PF3D7_1029900	PF10_0292				Pf3D7_10_v3:1,217,348..1,222,441(+)	conserved Plasmodium protein, unknown function	2.28311e-07	2.92432e-06	7.59957e-08	0.429976	-1.48268	0.660941	-1.24381	0.537736	1.35929	0.000152467	-8.17309	6.98857e-05	-9.3201	0.108941	-2.25172	0.133776	-2.24723	11.4536	69.5506	31.2656	27.1225	15.1816	65.849	29.4945	1
3581	PF10_0293	PF10_0293_v7.1_P1/1	transcription factor, putative	PF3D7_1030000	PF10_0293				Pf3D7_10_v3:1,223,375..1,224,167(+)	transcription elongation factor SPT4, putative	9.43003e-08	0.909465	1.21965e-05	0.0115159	-1.63221	0.932293	1.01582	0.394992	1.17119	0.819524	1.04308	0.808769	1.04575	0.0892614	-1.3783	0.0124467	-1.67788	12.3768	10.3997	0.0131248	0.00157546	9.27032	5.56392	4.08126	1
2167	PF10_0294	PF10_0294_v7.1_P4/4	RNA helicase, putative	PF3D7_1030100	PF10_0294				Pf3D7_10_v3:1,224,519..1,229,092(-)	pre-mRNA-splicing factor ATP-dependent RNA helicase PRP22, putative	4.12612e-10	0.962125	4.00414e-06	3.0356e-06	-1.75245	0.463254	-1.07745	0.371482	-1.09535	0.801958	1.02574	0.151207	1.15911	0.944649	1.00706	3.18044e-05	-1.67407	19.2083	4.85109	0.00228851	8.25667e-05	10.4246	1.88053	1.22668	1
2526	PF10_0295	PF10_0295_v7.1_P2/2	conserved Plasmodium protein, unknown function	PF3D7_1030200	PF10_0295				Pf3D7_10_v3:1,230,561..1,231,913(-)	claudin-like apicomplexan microneme protein, putative	9.07826e-13	0.134234	1.46309e-13	0.175419	1.61586	0.056833	1.98116	0.00878642	2.62248	0.814427	1.08548	1.24469e-05	-5.87791	0.0428225	-2.07442	0.887427	-1.05429	29.9933	90.0762	2.35377	1.00984	41.736	89.5299	14.587	1
989	PF10_0296	PF10_0296_v7.1_P3/4	conserved Plasmodium protein, unknown function	PF3D7_1030300	PF10_0296				Pf3D7_10_v3:1,233,667..1,237,002(-)	conserved Plasmodium protein, unknown function	2.10362e-13	0.742453	4.40516e-14	0.419477	-1.15103	0.0774388	1.36807	0.0038372	1.70602	0.75873	1.05474	0.00242911	-1.75736	0.00265587	-1.74731	0.00288647	-1.80555	33.1944	24.5604	0.109758	0.0116014	45.3351	23.9595	3.59378	1
3641	PF10_0299	PF10_0299_v7.1_P1/2	glycoprotease, putative	PF3D7_1030600	PF10_0299				Pf3D7_10_v3:1,245,880..1,247,676(-)	tRNA N6-adenosine threonylcarbamoyltransferase	7.06758e-10	0.665166	8.6425e-06	0.000212762	-2.10728	0.187411	-1.27365	0.375479	-1.17523	0.603969	-1.09871	0.3209	1.19855	0.141287	1.31099	0.000549295	-2.08166	18.4314	14.8813	0.190615	0.0219857	9.61959	5.54767	3.92159	1
2561	PF10_0300	PF10_0300_v7.1_P1/1	RNA methyltransferase, putative	PF3D7_1030700	PF10_0300				Pf3D7_10_v3:1,248,533..1,249,306(+)	RNA methyltransferase, putative	2.05954e-11	4.41704e-09	2.48674e-05	0.292352	1.26679	0.0268513	1.66797	0.0246268	1.68195	0.0358405	1.62128	0.0019447	2.10126	0.00659425	1.89631	0.753563	1.07768	24.0111	29.3186	60.8913	10.6215	8.56898	7.47362	5.93077	1
3837	PF10_0304	PF10_0304_v7.1_P1/1	conserved Plasmodium protein, unknown function	PF3D7_1031100	PF10_0304				Pf3D7_10_v3:1,254,843..1,255,586(-)	conserved Plasmodium protein, unknown function	1.63638e-05	0.161247	0.000610735	0.0252261	-2.07508	0.619706	-1.16903	0.818313	1.07485	0.415837	1.29285	0.185706	1.52375	0.521849	-1.22361	0.923625	-1.03272	7.5907	18.4334	2.05089	0.711491	5.73418	9.94644	11.7952	1
900	PF10_0307	PF10_0307_v7.1_P3/3	conserved Plasmodium protein, unknown function	PF3D7_1031300	PF10_0307				Pf3D7_10_v3:1,260,310..1,263,069(+)	conserved Plasmodium protein, unknown function	9.44145e-09	2.10589e-10	6.27366e-09	0.426987	-1.14362	1.37145e-06	-2.65249	5.46196e-05	-2.15882	0.0319284	-1.45272	0.0447983	-1.41588	0.0724857	-1.3626	0.00155022	-1.84801	15.0116	10.4456	79.2279	7.87562	18.7825	9.33534	3.37976	1
2867	PF10_0308	PF10_0308_v7.1_P3/3	OTU-like cysteine protease, putative	PF3D7_1031400	PF10_0308				Pf3D7_10_v3:1,265,079..1,268,785(+)	OTU-like cysteine protease	3.36403e-13	0.000199945	1.70408e-13	0.179922	1.47163	0.0791981	1.66641	0.309162	1.33822	0.0172619	-2.02683	7.89181e-06	-4.4123	0.00770291	-2.22421	0.482586	-1.23883	32.1366	63.9182	17.3665	4.93447	41.2967	58.6696	9.66065	1
1181	PF10_0309	PF10_0309_v7.1_P1/3	DEAD/DEAH box helicase, putative	PF3D7_1031500	PF10_0309				Pf3D7_10_v3:1,270,528..1,274,144(+)	DEAD/DEAH box helicase, putative	0.109284	0.826155	0.0716711	0.0141349	-2.60418	0.609205	-1.21034	0.0347435	2.25638	0.452238	-1.32491	0.44757	-1.32881	0.201857	1.61851	0.0596392	-2.1613	1.85061	6.32708	0.0489894	0.0239273	2.24962	5.49375	16.6062	1
891	PF10_0310	PF10_0310_v7.1_P3/3	conserved Plasmodium protein, unknown function	PF3D7_1031600	PF10_0310				Pf3D7_10_v3:1,275,863..1,278,577(+)	conserved Plasmodium protein, unknown function	4.0949e-07	1.74529e-11	1.43251e-06	1.57211e-07	-2.16783	1.41037e-05	-1.81562	0.00475221	-1.42722	0.000859498	-1.53774	0.000285502	-1.60976	0.138192	-1.19572	0.00112662	-1.56481	10.8687	3.76257	96.8908	4.79171	11.5563	2.85758	1.68146	1
1713	PF10_0311	PF10_0311_v7.1_P1/1	protein phosphatase inhibitor, putative	PF3D7_1031700	PF10_0311				Pf3D7_10_v3:1,281,252..1,281,989(+)	protein phosphatase inhibitor 3	3.66869e-08	0.000858568	7.83538e-05	0.251953	-1.10219	0.126947	1.13954	0.925122	1.00794	0.584282	1.0472	0.0265979	-1.21352	0.0100099	-1.25578	0.395371	-1.07986	13.4155	2.33554	13.3626	0.332333	7.49576	0.932111	0.845592	1
1577	PF10_0312	PF10_0312_v7.1_P1/2	conserved Plasmodium protein, unknown function	PF3D7_1031800	PF10_0312				Pf3D7_10_v3:1,282,405..1,284,057(-)	conserved Plasmodium protein, unknown function	7.29089e-08	0.515213	5.35848e-07	0.0887166	2.03842	0.251931	1.60584	0.415556	1.39789	0.0191714	-2.71661	0.356275	-1.46238	0.623953	1.22271	0.229153	1.70237	12.6543	52.199	0.432459	0.254842	12.7029	37.4283	20.0358	1
1599	PF10_0314	PF10_0314_v7.1_P1/4	dcp1 homologue, putative	PF3D7_1032100	PF10_0314				Pf3D7_10_v3:1,293,499..1,297,071(+)	mRNA-decapping enzyme subunit 1, putative	6.88303e-08	0.842214	0.00163531	0.00325882	-1.66545	0.377185	-1.1551	0.707799	-1.0628	0.499712	1.11621	0.710055	-1.06228	0.710908	-1.06208	0.00779745	-1.6277	12.7169	8.24762	0.0402362	0.00372791	4.95364	2.29479	3.15012	1
1249	PF10_0315	PF10_0315_v7.1_P3/3	conserved Plasmodium protein, unknown function	PF3D7_1032300	PF10_0315				Pf3D7_10_v3:1,299,794..1,302,409(+)	conserved Plasmodium protein, unknown function	3.17159e-19	0.862256	9.42825e-19	0.00042572	-1.5316	0.00219748	-1.43585	0.00589735	-1.37821	0.304025	1.1207	3.90253e-07	1.98206	2.54554e-06	1.85078	0.436325	-1.09631	79.7617	23.7521	0.0305629	0.00130018	91.8887	19.5452	1.4464	1
634	PF10_0316	PF10_0316_v7.1_P1/2	N-acetylglucosaminyl-phosphatidylinositol biosynthetic protein, putative	PF3D7_1032400	PF10_0316				Pf3D7_10_v3:1,302,594..1,304,881(-)	phosphatidylinositol N-acetylglucosaminyltransferase subunit A, putative	2.3554e-13	0.0252268	5.00344e-11	0.00382417	2.73009	0.234266	1.47951	0.00103427	-3.19255	0.0501493	-1.92886	0.937566	1.02585	0.448914	1.28122	0.0808238	1.86317	32.937	86.0795	5.48086	2.04629	27.4361	51.2165	12.6939	1
2675	PF10_0317	PF10_0317_v7.1_P1/1	DER1-like protein, putative	PF3D7_1032500	PF10_0317				Pf3D7_10_v3:1,306,241..1,307,532(-)	DER1-like protein, putative	0.00082949	0.00123994	0.0286048	0.00419221	1.9974	0.162397	1.37968	0.0075831	1.8962	0.124932	1.42556	0.173497	1.36796	0.0755808	1.5115	0.0787845	1.5475	4.75478	6.03225	12.4114	2.24942	2.87518	2.60547	6.16212	1
3248	PF10_0318	PF10_0318_v7.1_P1/1	conserved protein, unknown function	PF3D7_1032600	PF10_0318				Pf3D7_10_v3:1,308,873..1,309,925(+)	conserved protein, unknown function	2.27365e-08	0.0171921	1.96749e-07	0.946991	-1.00679	0.0517816	1.2258	0.00199138	1.40257	0.382746	-1.09343	0.215844	1.13585	0.0380926	1.24352	0.0507809	1.24439	13.9639	3.55793	6.2761	0.228445	13.9396	2.53694	1.23757	1
3258	PF10_0319	PF10_0319_v7.1_P2/2	conserved Plasmodium protein, unknown function	PF3D7_1032700	PF10_0319				Pf3D7_10_v3:1,310,421..1,312,082(-)	conserved Plasmodium protein, unknown function	0.123056	3.25512e-10	0.132587	6.32956e-06	-2.3047	0.00420731	-1.61658	0.0474425	-1.37984	0.0027562	-1.65763	0.000723913	-1.78919	0.00632574	-1.57711	0.000265198	-1.97588	1.78283	1.09113	76.3974	6.67955	1.83333	0.801455	2.97268	1
1372	PF10_0320	PF10_0320_v7.1_P3/5	conserved Plasmodium protein, unknown function	PF3D7_1032900	PF10_0320				Pf3D7_10_v3:1,315,718..1,320,949(-)	RNA polymerase II-associated protein 1, putative	8.85227e-12	0.000935987	5.91594e-07	0.0312462	-1.51979	0.560207	1.11583	0.234912	1.25266	0.146552	1.31888	0.0287921	1.53009	0.151731	1.31412	0.000100464	-2.40356	25.523	22.1221	13.1371	1.62665	12.5846	7.79119	4.20993	1
1429	PF10_0321	PF10_0321_v7.1_P2/2	conserved Plasmodium protein, unknown function	PF3D7_1033000	PF10_0321				Pf3D7_10_v3:1,321,694..1,323,379(+)	conserved Plasmodium protein, unknown function	0.305354	0.10321	0.0451492	0.420689	-1.23222	0.464322	1.20877	0.124492	1.49708	0.196372	-1.40159	0.352707	1.27302	0.0273982	1.80491	0.839363	1.05754	1.24703	2.04415	2.80392	0.656605	2.563	3.00095	7.96193	1
3171	PF10_0322	PF10_0322_v7.1_P5/5	S-adenosylmethionine decarboxylase/ornithine decarboxylase	PF3D7_1033100	PF10_0322				Pf3D7_10_v3:1,324,132..1,328,436(-)	S-adenosylmethionine decarboxylase/ornithine decarboxylase	4.98887e-07	0.00279189	0.133843	0.195944	1.16404	0.211314	1.158	0.449648	1.09206	0.576155	-1.06715	0.443996	1.09328	0.810499	1.02822	0.0131616	1.37999	10.6754	3.53541	10.3925	0.491672	1.82693	0.432163	1.60856	1
3473	PF10_0323	PF10_0323_v7.1_P1/1	early transcribed membrane protein 10.2	PF3D7_1033200	PF10_0323				Pf3D7_10_v3:1,335,222..1,336,289(+)	early transcribed membrane protein 10.2	1.97036e-09	0.000776309	2.2293e-09	0.144894	1.30235	0.00052552	-1.97013	0.0804971	-1.37568	0.561126	1.10951	0.753989	-1.05753	0.99673	1.00073	0.30413	1.21833	17.017	13.3225	13.6273	1.52411	20.4362	11.4282	3.80264	1
3741	PF10_0324	PF10_0324_v7.1_P1/1	conserved Plasmodium protein, unknown function	PF3D7_1033300	PF10_0324				Pf3D7_10_v3:1,338,124..1,338,818(-)	conserved Plasmodium protein, unknown function	5.97823e-10	1.22481e-06	4.03223e-07	0.472924	-1.14467	0.358205	1.18934	0.224996	1.25868	0.202128	1.27396	0.0204342	1.57262	2.63143e-06	2.85051	0.249405	-1.26266	18.6705	16.1611	34.6002	4.27854	13.0467	8.06653	4.20432	1
2496	PF10_0325	PF10_0325_v7.1_P1/1	haloacid dehalogenase-like hydrolase, putative	PF3D7_1033400	PF10_0325				Pf3D7_10_v3:1,339,762..1,340,628(+)	haloacid dehalogenase-like hydrolase	5.94061e-09	0.153781	1.34893e-07	0.00477049	-2.26567	0.0329039	-1.82622	0.0127371	-2.03847	0.968906	1.01069	0.814759	1.06603	0.153637	1.4847	0.00267184	-2.55503	15.5857	28.5486	2.12828	0.556914	14.4242	18.8722	8.8969	1
389	PF10_0326	PF10_0326_v7.1_P1/2	WD-repeat protein, putative	PF3D7_1033500	PF10_0326				Pf3D7_10_v3:1,341,646..1,343,775(+)	WD repeat-containing protein 70, putative	0.0555684	0.699817	0.0907593	0.00107747	-5.54349	0.694073	1.20937	0.857124	-1.09082	0.802973	1.12806	0.950859	1.0302	0.322958	1.61711	0.492426	-1.42691	2.23407	12.8141	0.151199	0.123892	2.08997	8.56255	27.8594	1
1103	PF10_0327	PF10_0327_v7.1_P1/3	Myb2 protein	PF3D7_1033600	PF10_0327				Pf3D7_10_v3:1,344,150..1,346,897(-)	pre-mRNA-splicing factor CEF1, putative	1.58162e-08	0.000162306	0.0381431	0.44673	-1.12537	0.180112	1.23366	0.523132	1.10406	0.992402	1.00147	0.162697	1.24477	0.0908759	1.30604	0.440335	1.13663	14.3901	8.46142	17.9707	1.50954	2.67796	1.12474	2.856	1
2533	PF10_0328	PF10_0328_v7.1_P2/2	bromodomain protein, putative	PF3D7_1033700	PF10_0328				Pf3D7_10_v3:1,348,433..1,350,280(+)	bromodomain protein 1	0.000467438	1.87557e-09	0.501619	0.263571	1.30128	0.00191509	2.17991	0.00356878	2.06543	0.0289374	1.69622	0.00729686	1.93713	0.000249319	2.57976	0.116452	1.49024	5.13415	6.8816	65.7229	12.5846	0.88526	0.847546	6.51031	1
429	PF10_0329	PF10_0329_v7.1_P2/2	plasmepsin VII	PF3D7_1033800	PF10_0329				Pf3D7_10_v3:1,351,197..1,353,284(+)	plasmepsin VII	0.306935	0.203541	0.536965	0.155201	-3.60336	0.383693	-2.17757	0.188958	3.2612	0.242236	-2.85613	0.199949	-3.16644	0.63012	1.53497	0.0435998	-7.21288	1.24383	24.1565	1.68086	4.66343	0.830665	11.5231	94.3306	1
3739	PF10_0330	PF10_0330_v7.1_P1/1	ubiquitin conjugating enzyme, putative	PF3D7_1033900	PF10_0330				Pf3D7_10_v3:1,354,454..1,355,571(-)	ubiquitin-conjugating enzyme E2, putative	3.17816e-11	0.045342	7.92847e-12	0.0597703	1.59557	0.144946	1.43036	0.00239785	2.19692	0.00715072	-1.98711	0.00107237	-2.35799	0.395377	-1.22939	0.848431	1.05063	23.263	33.4423	4.31754	0.886684	31.4351	32.2788	6.98251	1
1863	PF10_0332	PF10_0332_v7.1_P1/1	apicoplast ribosomal protein L27 precursor, putative	PF3D7_1034200	PF10_0332				Pf3D7_10_v3:1,363,474..1,364,118(+)	ribosomal protein L27, putative	3.45458e-07	0.000377052	0.00911276	0.372511	-1.54083	0.690985	-1.21142	0.114903	-2.16848	0.540563	-1.34412	0.109204	-2.19658	0.389291	-1.51768	0.4193	-1.51909	11.0369	63.0861	15.5773	12.7198	3.67693	15.0121	27.7629	1
29	PF10_0334	PF10_0334_v7.1_P1/2	flavoprotein subunit of succinate dehydrogenase	PF3D7_1034400	PF10_0334				Pf3D7_10_v3:1,367,294..1,369,189(-)	flavoprotein subunit of succinate dehydrogenase	9.48516e-12	0.690882	1.01147e-09	0.00539043	2.87851	0.0922263	1.85187	0.0510624	-2.05288	0.837212	1.07641	0.0828913	1.88789	0.103831	1.81197	0.230638	1.59053	25.3965	80.2303	0.160853	0.0725933	21.7682	49.1201	15.3442	1
[truncated: 2,896 more rows]

## Sheet: Non-apicoplast genes
Column #	PrimaryAccession	ProbeID	Description	New Gene ID	Aliaes	Alias 2	Alias 3	Alias 4	Genomic Location (Gene)	Product Description	p-value(Time)	p-value(Treatment)	p-value(Time * Treatment)	p-value(Time 08 * PyrkII CLD vs. Time 0 * Control)	Fold-Change(Time 08 * PyrkII CLD vs. Time 0 * Control)	p-value(Time 16 * PyrkII CLD vs. Time 08 * Control)	Fold-Change(Time 16 * PyrkII CLD vs. Time 08 * Control)	p-value(Time 24 * PyrkII CLD vs. Time 16 * Control)	Fold-Change(Time 24 * PyrkII CLD vs. Time 16 * Control)	p-value(Time 32 * PyrkII CLD vs. Time 24 * Control)	Fold-Change(Time 32 * PyrkII CLD vs. Time 24 * Control)	p-value(Time 40 * PyrkII CLD vs. Time 32 * Control)	Fold-Change(Time 40 * PyrkII CLD vs. Time 32 * Control)	p-value(Time 48 * PyrkII CLD vs. Time 40 * Control)	Fold-Change(Time 48 * PyrkII CLD vs. Time 40 * Control)	p-value(Time 56 * PyrkII CLD vs. Time 48 * Control)	Fold-Change(Time 56 * PyrkII CLD vs. Time 48 * Control)	F(Time)	SS(Time)	F(Treatment)	SS(Treatment)	F(Time * Treatment)	SS(Time * Treatment)	SS(Error)	F(Error)
[truncated: 3,895 more rows]

[truncated: 2 more sheets: Apicoplast genes, Apicoplast gene analysis]
