# Supplementary figures and images for: The NTP generating activity of pyruvate kinase II is critical for apicoplast maintenance in Plasmodium falciparum
Source: eLife journal article supplement (doi:10.7554/elife.50807), 2020-08-20

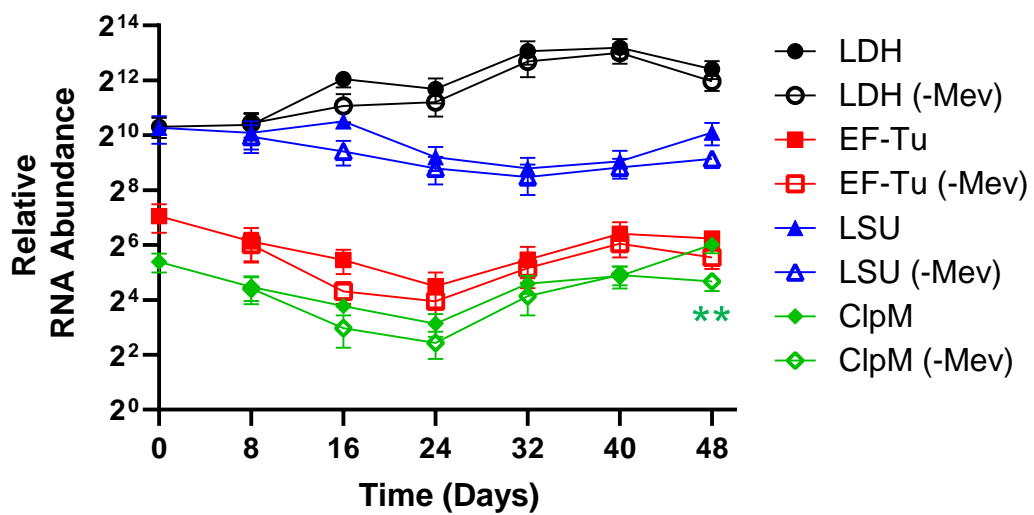

Supplement: supp [file elife-50807-supp-v1.zip]

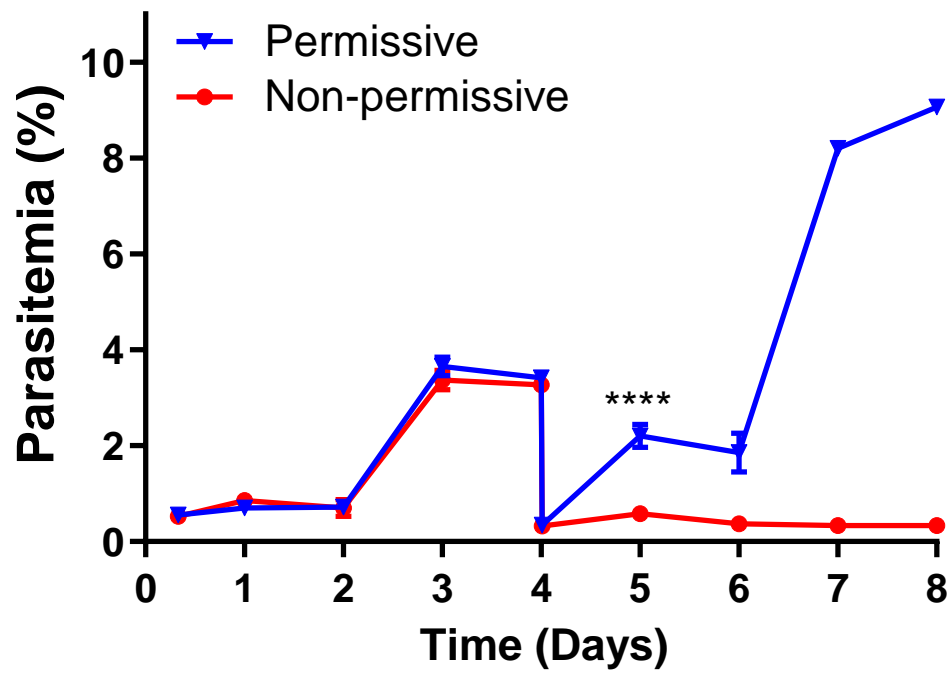

Supplement: supp [file elife-50807-supp-v1.zip]

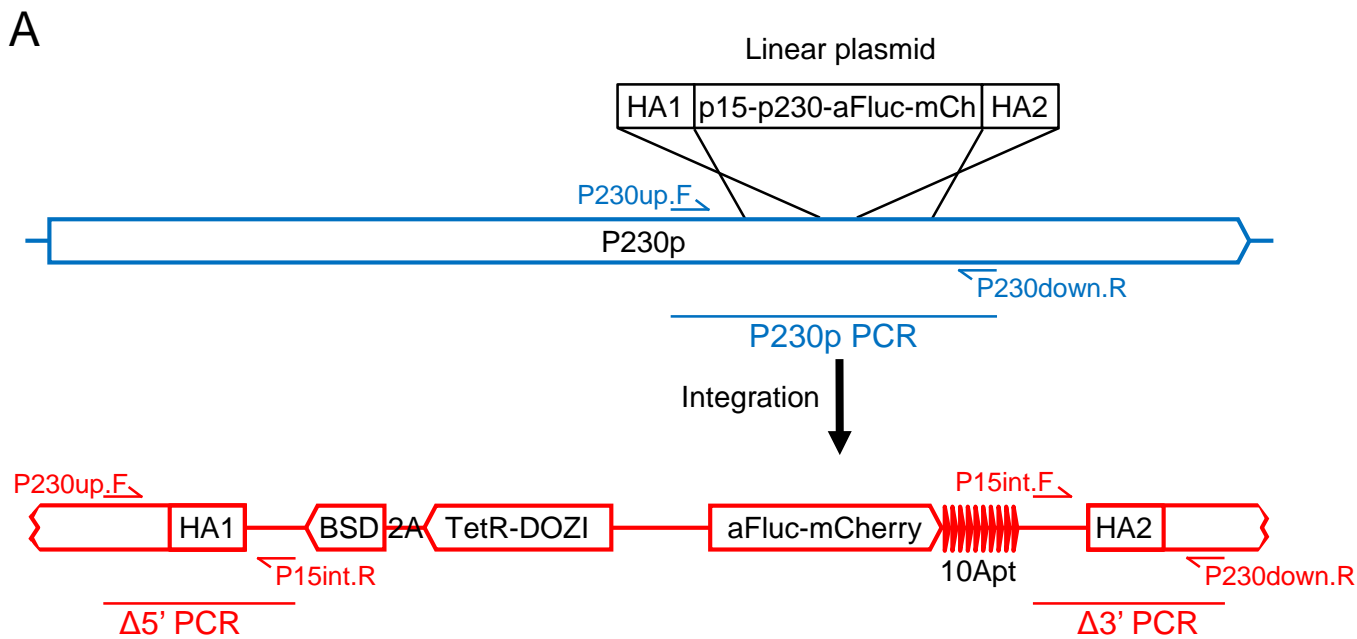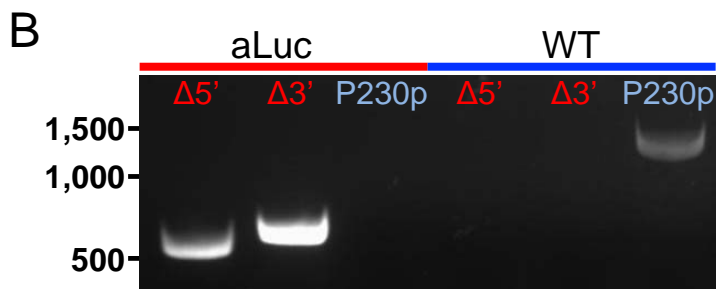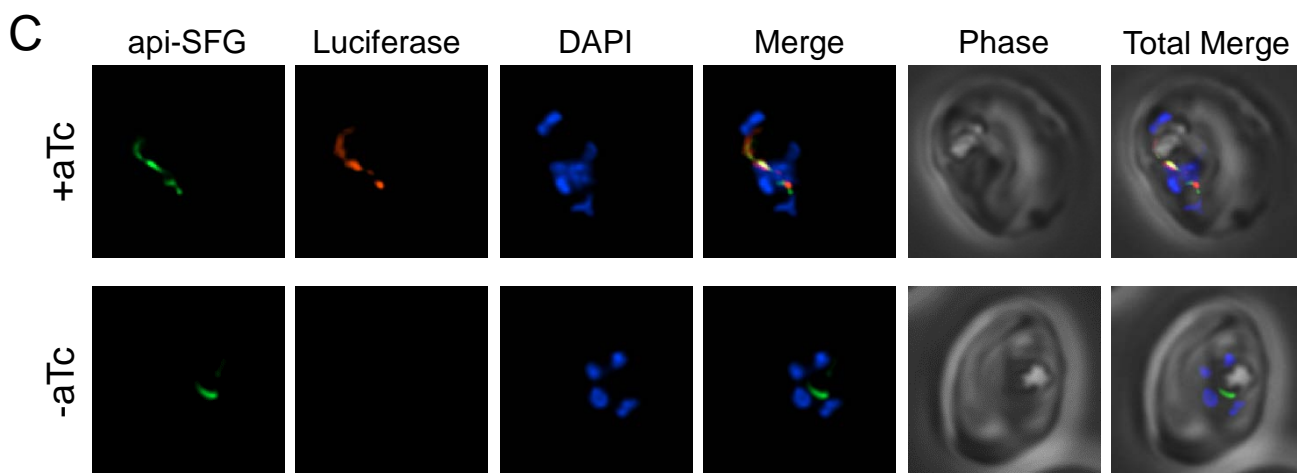

Supplement: supp [file elife-50807-supp-v1.zip]
